# Supplementary material for: Organocatalytic asymmetric vinylogous Michael addition of 3-alkylidene oxindoles to α-substituted β-nitroacrylates: facile construction of a chiral all-carbon quaternary center
Source: Royal Society of Chemistry journal article supplement (doi:10.1039/c4ra09128k), 2014-09-25
Supplement: c4ra09128k1.pdf [file c4ra09128k1.pdf]

**Organocatalytic asymmetric vinylogous Michael addition of  
3-alkylidene oxindoles to  $\alpha$ -substituted  $\beta$ -nitroacrylates: Facile  
construction of chiral all-carbon quaternary center**

Yuan Zhong,<sup>§ab</sup> Shixiong Ma,<sup>§ab</sup> Zhaoqing Xu,<sup>\*b</sup> Min Chang<sup>a</sup> and Rui Wang<sup>\*ab</sup>

<sup>a</sup> School of Life Sciences, Lanzhou University, Lanzhou, 730000, P.R. China

<sup>b</sup> Key Laboratory of Preclinical Study for New Drugs of Gansu Province, School of Basic Medical Sciences, Lanzhou University, Lanzhou, 730000, P.R. China

*E-mail: zqxu@lzu.edu.cn, wangrui@lzu.edu.cn*

**Supporting Information**

**Table of Content:**

|                                                                                                                                                     |         |
|-----------------------------------------------------------------------------------------------------------------------------------------------------|---------|
| 1. General methods                                                                                                                                  | S2      |
| 2. Characterization of substrates <b>1b-1d</b> , <b>1g</b> , <b>1h</b> , <b>2b</b> and <b>2c</b>                                                    | S3-S4   |
| 3. General procedure for Michael addition of $\alpha$ -substituted $\beta$ -nitroacrylates <b>1</b> and 3-alkylidene oxindole <b>2</b>              | S5      |
| 4. Characterization of products <b>4</b> and <b>5</b>                                                                                               | S6-S15  |
| 5. In-situ ESI-HRMS analysis experiment                                                                                                             | S16     |
| 6. References                                                                                                                                       | S17     |
| 7. Crystal data and the absolute configuration for enantiopure compound <b>5</b>                                                                    | S18     |
| 8. <sup>1</sup> H and <sup>13</sup> C NMR Spectra of compounds <b>1b-1d</b> , <b>1g</b> , <b>1h</b> , <b>2b</b> , <b>2c</b> , <b>4</b> and <b>5</b> | S19-S73 |
| 9. HPLC Chromatogram of compounds <b>4</b> and <b>5</b>                                                                                             | S74-S92 |

## 1. General methods

Unless stated otherwise, all reactions were carried out in flame dried glassware. All solvents were purified and dried according to standard methods prior to use.  $\alpha$ -substituted  $\beta$ -Nitroacrylates **1**<sup>1</sup>, 3-alkylidene oxindoles **2**<sup>2</sup> and catalysts **3**<sup>3</sup> were prepared according to literature procedures. Reactions were monitored by thin layer chromatography (TLC), column chromatography purifications were carried out using silica gel GF254. <sup>1</sup>H, <sup>13</sup>C and <sup>19</sup>F spectra were recorded on a Varian instrument (300 MHz, 75 MHz and 282 MHz, respectively) and internally referenced to tetramethylsilane signal or residual protio solvent signals. Data are presented as follows: chemical shift, integration, multiplicity (s = singlet, d = doublet, dd = doublet of doublets, t = triplet, m = multiplet) and coupling constant in Hertz (Hz). Optical rotations were recorded on a Perkin-Elmer 341 polarimeter. HRMS was measured with an APEX II 47e mass spectrometer. The ee values determination was carried out using chiral high-performance liquid chromatography (HPLC) with Daicel Chiracel OD-H column, Chiracel IC-H column or Chiracel IB-H column on Waters with a 2998 UV-detector.

## 2. Characterization of substrates **1b-1d**, **1g**, **1h**, **2b** and **2c**

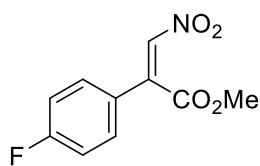

(*Z*)-methyl 2-(4-fluorophenyl)-3-nitroacrylate (**1b**): 64% yield; Yellow solid;  $^1\text{H NMR}$  (300 MHz,  $\text{CDCl}_3$ ):  $\delta$  (ppm) 7.54-7.49 (m, 2H), 7.33 (s, 1H), 7.17 (t,  $J = 8.5$  Hz, 2H), 4.00 (s, 3H);  $^{13}\text{C NMR}$  (75 MHz,  $\text{CDCl}_3$ ):  $\delta$  (ppm) 165.2, 165 ( $J_{\text{C-F}} = 253.5$  Hz), 163.3, 142.0, 134.5, 129.8 ( $J_{\text{C-F}} = 9.0$  Hz), 125.5 ( $J_{\text{C-F}} = 3.0$  Hz), 117.0 ( $J_{\text{C-F}} = 22.5$  Hz), 53.6;  $^{19}\text{F NMR}$  (282 MHz,  $\text{CDCl}_3$ )  $\delta$  (ppm) -105.84; **ESI-HRMS**: calcd. for  $\text{C}_{10}\text{H}_8\text{FNO}_4 + \text{Na}^+$  248.0330, found 248.0332.

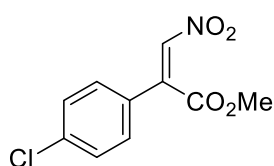

(*Z*)-methyl 2-(4-chlorophenyl)-3-nitroacrylate (**1c**): 68% yield; Yellow solid;  $^1\text{H NMR}$  (300 MHz,  $\text{CDCl}_3$ ):  $\delta$  (ppm) 7.45 (s, 4H), 7.35 (s, 1H), 4.00 (s, 3H);  $^{13}\text{C NMR}$  (75 MHz,  $\text{CDCl}_3$ ):  $\delta$  (ppm) 165.0, 141.9, 138.7, 134.9, 129.9, 128.8, 127.8, 53.6; **ESI-HRMS**: calcd. for  $\text{C}_{10}\text{H}_8\text{ClNO}_4 + \text{Na}^+$  264.0034, found 264.0039.

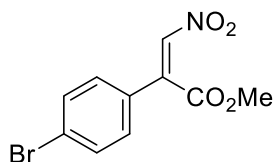

(*Z*)-methyl 2-(4-bromophenyl)-3-nitroacrylate (**1d**): 61% yield; Yellow solid;  $^1\text{H NMR}$  (300 MHz,  $\text{CDCl}_3$ ):  $\delta$  (ppm) 7.64-7.59 (m, 2H), 7.39-7.37 (m, 1H), 7.35 (s, 2H), 3.99 (s, 3H);  $^{13}\text{C NMR}$  (75 MHz,  $\text{CDCl}_3$ ):  $\delta$  (ppm) 164.9, 142.0, 134.8, 132.9, 128.9, 128.2, 127.1, 53.6; **ESI-HRMS**: calcd. for  $\text{C}_{10}\text{H}_8\text{BrNO}_4 + \text{Na}^+$  307.9529, found 307.9535.

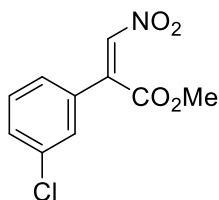

(*Z*)-methyl 2-(3-chlorophenyl)-3-nitroacrylate (**1g**): 52% yield; Yellow oil;  $^1\text{H NMR}$  (300 MHz,  $\text{CDCl}_3$ ):  $\delta$  (ppm) 7.52-7.49 (m, 2H), 7.42-7.40 (m, 2H), 7.34 (s, 1H), 4.00 (s, 3H);  $^{13}\text{C NMR}$  (75 MHz,  $\text{CDCl}_3$ ):  $\delta$  (ppm) 164.8, 141.6, 135.7, 135.6, 132.1, 131.1, 130.8, 127.4, 125.6, 53.7; **ESI-HRMS**: calcd. for  $\text{C}_{10}\text{H}_8\text{ClNO}_4 + \text{Na}^+$  264.0034, found 264.0041.

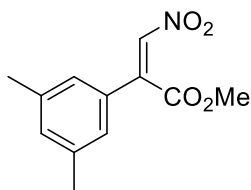

(*Z*)-methyl 2-(3,5-dimethylphenyl)-3-nitroacrylate (**1b**): 62% yield; Yellow solid; **<sup>1</sup>H NMR** (300 MHz, CDCl<sub>3</sub>): δ (ppm) 7.34 (s, 1H), 7.16 (s, 1H), 7.09 (s, 2H), 3.99 (s, 3H), 2.35 (s, 6H); **<sup>13</sup>C NMR** (75 MHz, CDCl<sub>3</sub>): δ (ppm) 165.5, 143.5, 139.4, 134.3, 134.1, 129.2, 125.2, 53.4, 21.2; **ESI-HRMS**: calcd. for C<sub>12</sub>H<sub>13</sub>NO<sub>4</sub>+Na<sup>+</sup> 258.0737, found 258.0745.

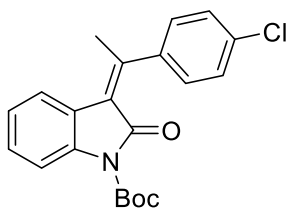

(*Z*)-tert-butyl 3-(1-(4-chlorophenyl)ethylidene)-2-oxoindoline-1-carboxylate (**2b**): 54% yield; Yellow oil; **<sup>1</sup>H NMR** (300 MHz, CDCl<sub>3</sub>): δ (ppm) 7.82 (d, *J* = 8.2 Hz, 1H), 7.47 (d, *J* = 8.2 Hz, 2H), 7.19 (m, 3H), 6.78 (t, *J* = 7.6 Hz, 1H), 6.27 (d, *J* = 7.7 Hz, 1H), 2.75 (s, 3H), 1.67 (s, 9H); **<sup>13</sup>C NMR** (75 MHz, CDCl<sub>3</sub>): δ (ppm) 166.0, 154.7, 149.5, 141.2, 138.3, 134.6, 129.7, 128.6, 128.0, 123.4, 122.8, 122.7, 122.6, 114.6, 84.2, 28.2, 23.7; **ESI-HRMS**: calcd. for C<sub>21</sub>H<sub>20</sub>ClNO<sub>3</sub>+Na<sup>+</sup> 392.1024, found 392.1030.

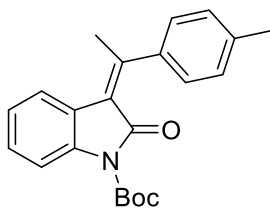

(*Z*)-tert-butyl 2-oxo-3-(1-(*p*-tolyl)ethylidene)indoline-1-carboxylate (**2c**): 68% yield; Yellow oil; **<sup>1</sup>H NMR** (300 MHz, CDCl<sub>3</sub>): δ (ppm) 7.81 (d, *J* = 8.1 Hz, 1H), 7.28 (d, *J* = 7.9 Hz, 2H), 7.17-7.13 (m, 3H), 6.77-6.72 (m, 1H), 6.30 (d, *J* = 7.7 Hz, 1H), 2.77 (s, 3H), 2.45 (s, 3H), 1.68 (s, 9H); **<sup>13</sup>C NMR** (75 MHz, CDCl<sub>3</sub>): δ (ppm) 166.3, 157.1, 149.6, 143.5, 139.9, 138.6, 138.1, 130.0, 128.1, 126.4, 123.2, 122.6, 122.2, 114.4, 84.0, 28.2, 23.9, 21.4; **ESI-HRMS**: calcd. for C<sub>22</sub>H<sub>23</sub>NO<sub>3</sub>+H<sup>+</sup> 350.1751, found 350.1757.

### 3. General procedure for Michael addition of $\alpha$ -substituted $\beta$ -nitroacrylates **1** and 3-alkylidene oxindole **2**

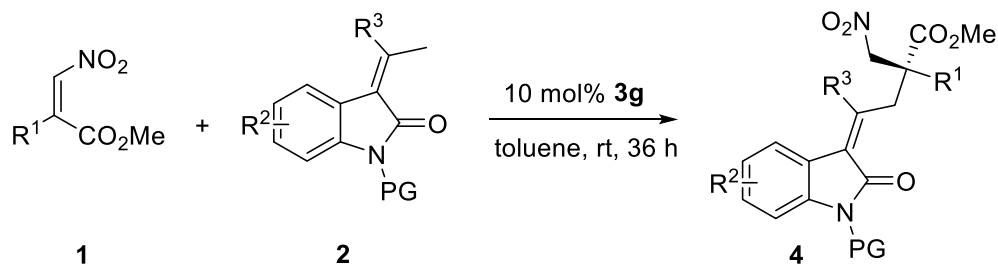

An ordinary vial equipped with a magnetic stirring bar was charged with  $\alpha$ -substituted  $\beta$ -nitroacrylates **1** (0.3 mmol) and 3-alkylidene oxindole **2** (0.45mmol) in toluene (1.2 mL), and then quinine-derived squaramide **3g** (18.9 mg, 10mol %) was added. The stirring was maintained at room temperature for 36 hours. The reaction mixture was directly charged onto silica gel and purified through flash chromatography (PE/EtOAc = 10:1) to furnish the corresponding products **4**.

#### 4. Characterization of products 4 and 5

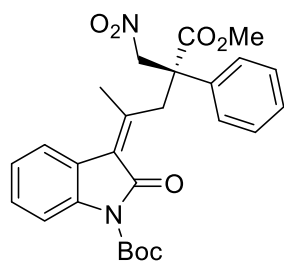

(*S,Z*)-tert-butyl 3-(5-methoxy-4-(nitromethyl)-5-oxo-4-phenylpentan-2-ylidene)-2-oxoindoline-1-carboxylate (**4a**): 99% yield; Yellow solid;  $[\alpha]_{\text{D}}^{27} = +59$  ( $c = 1.00$  in  $\text{CHCl}_3$ ); 95% ee, determined by HPLC analysis [Daicel chiralpak OD-H, n-hexane/*i*-PrOH = 95/5, 0.5 mL/min,  $\lambda = 254$  nm,  $t$  (minor) = 22.44 min,  $t$  (major) = 25.09 min]; *Z:E* > 20:1;  $^1\text{H NMR}$  (300 MHz,  $\text{CDCl}_3$ ):  $\delta$  (ppm) 7.73 (d,  $J = 8.2$  Hz, 1H), 7.40 (d,  $J = 7.7$  Hz, 1H), 7.32 (m, 4H), 7.26-7.20 (m, 2H), 7.07-7.04 (m, 1H), 5.37 (d,  $J = 15.7$  Hz, 1H), 5.06 (d,  $J = 15.7$  Hz, 1H), 4.15 (d,  $J = 12.7$  Hz, 1H), 3.76 (s, 3H), 3.65 (d,  $J = 12.9$  Hz, 1H), 2.10 (s, 3H), 1.60 (s, 9H);  $^{13}\text{C NMR}$  (75 MHz,  $\text{CDCl}_3$ ):  $\delta$  (ppm) 172.8, 166.3, 154.7, 149.0, 138.6, 138.1, 128.9, 128.7, 128.0, 126.4, 125.6, 124.5, 123.9, 123.4, 114.5, 84.6, 78.2, 55.2, 52.9, 43.1, 28.2, 25.5; **ESI-HRMS**: calcd. for  $\text{C}_{26}\text{H}_{28}\text{N}_2\text{O}_7 + \text{Na}^+$  503.1789, found 503.1794.

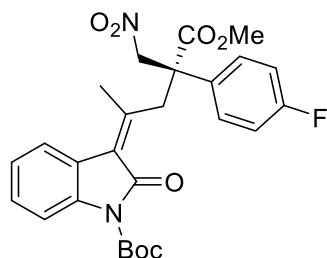

(*S,Z*)-tert-butyl 3-(4-(4-fluorophenyl)-5-methoxy-4-(nitromethyl)-5-oxopentan-2-ylidene)-2-oxoindoline-1-carboxylate (**4b**): 83% yield; Yellow solid;  $[\alpha]_{\text{D}}^{27} = +91$  ( $c = 1.00$  in  $\text{CHCl}_3$ ); 96% ee, determined by HPLC analysis [Daicel chiralpak OD-H, n-hexane/*i*-PrOH = 95/5, 0.5 mL/min,  $\lambda = 254$  nm,  $t$  (minor) = 24.21 min,  $t$  (major) = 31.63 min]; *Z:E* > 20:1;  $^1\text{H NMR}$  (300 MHz,  $\text{CDCl}_3$ ):  $\delta$  (ppm) 7.80 (d,  $J = 7.7$  Hz, 1H), 7.50 (d,  $J = 7.6$  Hz, 1H), 7.46-7.39 (m, 2H), 7.40-7.29 (m, 1H), 7.18-7.13 (m, 1H), 7.10-7.01 (m, 2H), 5.40 (d,  $J = 15.6$  Hz, 1H), 5.11 (d,  $J = 15.6$  Hz, 1H), 4.28 (d,  $J = 12.7$  Hz, 1H), 3.84 (s, 3H), 3.59 (d,  $J = 12.7$  Hz, 1H), 2.22 (s, 3H), 1.68 (s, 9H);  $^{13}\text{C NMR}$  (75 MHz,  $\text{CDCl}_3$ ):  $\delta$  (ppm) 172.7, 166.4, 162.1 ( $J_{\text{C-F}} = 246.8$  Hz), 154.0, 148.9, 138.1, 134.5 ( $J_{\text{C-F}} = 3.8$  Hz), 128.8, 128.5 ( $J_{\text{C-F}} = 8.3$  Hz), 125.8, 124.5, 124.0, 123.2, 115.7 ( $J_{\text{C-F}} = 21.8$  Hz), 114.6, 84.7, 78.2, 54.7, 53.0, 43.4, 28.2, 25.4;  $^{19}\text{F NMR}$  (282 MHz,  $\text{CDCl}_3$ )  $\delta$  (ppm) -113.8; **ESI-HRMS**:

calcd. for  $C_{26}H_{27}FN_2O_7+Na^+$  521.1695, found 521.1717.

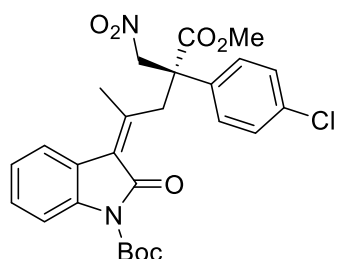

(*S,Z*)-tert-butyl 3-(4-(4-chlorophenyl)-5-methoxy-4-(nitromethyl)-5-oxopentan-2-ylidene)-2-oxoindoline-1-carboxylate (**4c**): 81% yield; Yellow solid;  $[\alpha]_D^{27} = +114$  ( $c = 1.00$  in  $CHCl_3$ ); 95% ee, determined by HPLC analysis [Daicel chiralpak OD-H, n-hexane/*i*-PrOH = 95/5, 0.5 mL/min,  $\lambda = 254$  nm,  $t$  (minor) = 23.74 min,  $t$  (major) = 28.07 min]; *Z:E* = 17:1;  **$^1H$  NMR** (300 MHz,  $CDCl_3$ ):  $\delta$  (ppm) 7.80 (d,  $J = 7.7$  Hz, 1H), 7.50 (d,  $J = 7.6$  Hz, 1H), 7.43-7.37 (m, 2H), 7.36-7.29 (m, 3H), 7.18-7.13 (m, 1H), 5.39 (d,  $J = 15.7$  Hz, 1H), 5.10 (d,  $J = 15.7$  Hz, 1H), 4.29 (d,  $J = 12.7$  Hz, 1H), 3.84 (s, 3H), 3.57 (d,  $J = 12.7$  Hz, 1H), 2.22 (s, 3H), 1.68 (s, 9H);  **$^{13}C$  NMR** (75 MHz,  $CDCl_3$ ):  $\delta$  (ppm) 172.4, 166.4, 153.7, 148.9, 138.1, 137.2, 134.0, 128.9, 128.9, 128.1, 125.9, 124.5, 124.0, 123.2, 114.6, 84.7, 78.0, 54.8, 53.0, 43.3, 28.2, 25.4; **ESI-HRMS**: calcd. for  $C_{26}H_{27}ClN_2O_7+Na^+$  537.1399, found 537.1421.

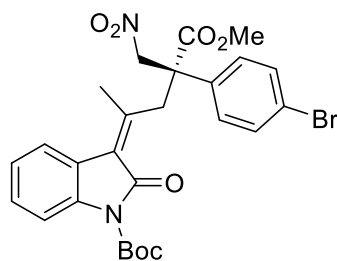

(*S,Z*)-tert-butyl 3-(4-(4-bromophenyl)-5-methoxy-4-(nitromethyl)-5-oxopentan-2-ylidene)-2-oxoindoline-1-carboxylate (**4d**): 82% yield; Yellow solid;  $[\alpha]_D^{27} = +129$  ( $c = 1.00$  in  $CHCl_3$ ); 96% ee, determined by HPLC analysis [Daicel chiralpak OD-H, n-hexane/*i*-PrOH = 95/5, 0.5 mL/min,  $\lambda = 254$  nm,  $t$  (minor) = 23.39 min,  $t$  (major) = 27.41 min]; *Z:E* > 20:1;  **$^1H$  NMR** (300 MHz,  $CDCl_3$ ):  $\delta$  (ppm) 7.80 (d,  $J = 7.7$  Hz, 1H), 7.56-7.44 (m, 3H), 7.38-7.28 (m, 3H), 7.19-7.14 (m, 1H), 5.38 (d,  $J = 15.7$  Hz, 1H), 5.10 (d,  $J = 15.7$  Hz, 1H), 4.28 (d,  $J = 12.7$  Hz, 1H), 3.84 (s, 3H), 3.56 (d,  $J = 12.7$  Hz, 1H), 2.22 (s, 3H), 1.68 (s, 9H);  **$^{13}C$  NMR** (75 MHz,  $CDCl_3$ ):  $\delta$  (ppm) 172.4, 166.4, 153.6, 148.9, 138.2, 137.8, 131.9, 128.9, 128.4, 125.9, 124.6, 124.0, 123.2, 122.2, 114.6, 84.7, 77.9, 54.8, 53.0, 43.3, 28.2, 25.4; **ESI-HRMS**: calcd. for  $C_{26}H_{27}BrN_2O_7+H^+$  559.1074,

found 559.1098; C<sub>26</sub>H<sub>27</sub>BrN<sub>2</sub>O<sub>7</sub>+Na<sup>+</sup> 581.0894, found 581.0919.

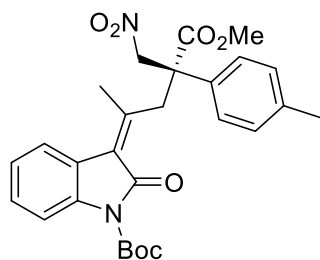

(*S,Z*)-tert-butyl 3-(5-methoxy-4-(nitromethyl)-5-oxo-4-(*p*-tolyl)pentan-2-ylidene)-2-oxoindoline-1-carboxylate (**4e**): 53% yield; Yellow oil;  $[\alpha]_{\text{D}}^{27} = +50$  ( $c = 1.00$  in CHCl<sub>3</sub>); 95% ee, determined by HPLC analysis [Daicel chiralpak IC-H, n-hexane/*i*-PrOH = 90/10, 1.0 mL/min,  $\lambda = 254$  nm,  $t$  (minor) = 27.67 min,  $t$  (major) = 35.13 min]; *Z:E* = 11:1; **<sup>1</sup>H NMR** (300 MHz, CDCl<sub>3</sub>):  $\delta$  (ppm) 7.71 (d,  $J = 8.1$  Hz, 1H), 7.38 (d,  $J = 7.7$  Hz, 1H), 7.21-7.16 (m, 3H), 7.08-7.02 (m, 3H), 5.31 (d,  $J = 15.6$  Hz, 1H), 5.01 (d,  $J = 15.6$  Hz, 1H), 4.08 (d,  $J = 12.7$  Hz, 1H), 3.72 (s, 3H), 3.64 (d,  $J = 12.7$  Hz, 1H), 2.23 (s, 3H), 2.06 (s, 3H), 1.58 (s, 9H); **<sup>13</sup>C NMR** (75 MHz, CDCl<sub>3</sub>):  $\delta$  (ppm) 172.9, 166.2, 155.0, 149.1, 138.1, 137.9, 135.6, 129.6, 128.6, 126.2, 125.5, 124.5, 123.9, 123.4, 114.5, 84.5, 78.2, 54.9, 52.8, 43.1, 28.2, 25.6, 21.0; **ESI-HRMS**: calcd. for C<sub>27</sub>H<sub>30</sub>N<sub>2</sub>O<sub>7</sub>+Na<sup>+</sup> 517.1945, found 517.1961.

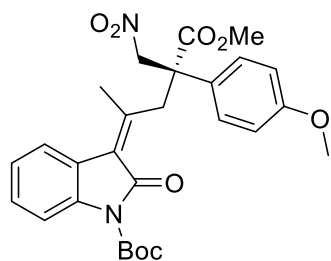

(*S,Z*)-tert-butyl 3-(5-methoxy-4-(4-methoxyphenyl)-4-(nitromethyl)-5-oxopentan-2-ylidene)-2-oxoindoline-1-carboxylate (**4f**): 36% yield; Yellow oil;  $[\alpha]_{\text{D}}^{27} = +58$  ( $c = 1.00$  in CHCl<sub>3</sub>); 92% ee, determined by HPLC analysis [Daicel chiralpak IC-H, n-hexane/*i*-PrOH = 80/20, 1.0 mL/min,  $\lambda = 254$  nm,  $t$  (minor) = 26.23 min,  $t$  (major) = 35.91 min]; *Z:E* = 9:1; **<sup>1</sup>H NMR** (300 MHz, CDCl<sub>3</sub>):  $\delta$  (ppm) 7.80 (d,  $J = 8.1$  Hz, 1H), 7.50 (d,  $J = 7.7$  Hz, 1H), 7.32-7.30 (m, 3H), 7.17-7.11 (m, 1H), 6.87 (d,  $J = 8.7$  Hz, 2H), 5.40 (d,  $J = 15.6$  Hz, 1H), 5.09 (d,  $J = 15.6$  Hz, 1H), 4.19 (d,  $J = 12.7$  Hz, 1H), 3.82 (s, 3H), 3.79 (s, 3H), 3.71 (d,  $J = 13.5$  Hz, 1H), 2.17 (s, 3H), 1.67 (s, 9H); **<sup>13</sup>C NMR** (75 MHz, CDCl<sub>3</sub>):  $\delta$  (ppm) 173.0, 166.2, 159.0, 154.9, 149.0, 138.1, 132.2, 130.5, 128.6, 127.6, 125.6, 124.5, 123.9, 123.4, 114.1, 84.6, 78.3, 55.3, 54.6, 52.8, 43.1, 28.2, 25.6; **ESI-HRMS**: calcd. for



C<sub>27</sub>H<sub>30</sub>N<sub>2</sub>O<sub>8</sub>+Na<sup>+</sup> 533.1894, found 533.1920.

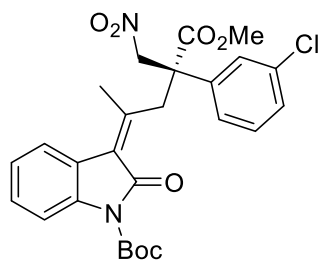

(*S,Z*)-tert-butyl 3-(4-(3-chlorophenyl)-5-methoxy-4-(nitromethyl)-5-oxopentan-2-ylidene)-2-oxoindoline-1-carboxylate (**4g**): 68% yield; Yellow oil; [ $\alpha$ ]<sub>D</sub><sup>27</sup> = +23 (c = 1.00 in CHCl<sub>3</sub>); 86% ee, determined by HPLC analysis [Daicel chiralpak IC-H, n-hexane/*i*-PrOH = 90/10, 1.0 mL/min,  $\lambda$  = 254 nm, t (minor) = 16.00 min, t (major) = 19.08 min]; *Z:E* > 20:1; **<sup>1</sup>H NMR** (300 MHz, CDCl<sub>3</sub>):  $\delta$  (ppm) 7.74 (d, *J* = 8.1 Hz, 1H), 7.43 (d, *J* = 7.7 Hz, 1H), 7.36 (s, 1H), 7.30-7.21 (m, 4H), 7.11-7.06 (m, 1H), 5.33 (d, *J* = 15.7 Hz, 1H), 5.06 (d, *J* = 15.7 Hz, 1H), 4.19 (d, *J* = 12.6 Hz, 1H), 3.77 (s, 3H), 3.52 (d, *J* = 12.7 Hz, 1H), 2.16 (s, 3H), 1.61 (s, 9H); **<sup>13</sup>C NMR** (75 MHz, CDCl<sub>3</sub>):  $\delta$  (ppm) 172.2, 166.3, 153.5, 149.0, 140.7, 138.2, 134.7, 130.1, 128.9, 128.3, 126.9, 126.0, 124.7, 124.5, 124.0, 123.2, 114.6, 84.7, 77.8, 54.9, 53.1, 43.3, 28.2, 25.4; **ESI-HRMS**: calcd. for C<sub>26</sub>H<sub>27</sub>ClN<sub>2</sub>O<sub>7</sub>+Na<sup>+</sup> 537.1399, found 537.1398.

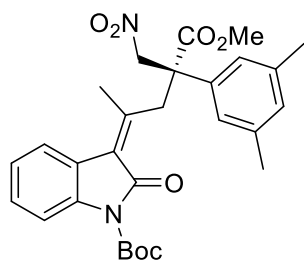

(*S,Z*)-tert-butyl 3-(4-(3,5-dimethylphenyl)-5-methoxy-4-(nitromethyl)-5-oxopentan-2-ylidene)-2-oxoindoline-1-carboxylate (**4h**): 56% yield; Yellow oil; [ $\alpha$ ]<sub>D</sub><sup>27</sup> = +68 (c = 1.00 in CHCl<sub>3</sub>); 96% ee, determined by HPLC analysis [Daicel chiralpak IC-H, n-hexane/*i*-PrOH = 90/10, 1.0 mL/min,  $\lambda$  = 254 nm, t (minor) = 19.23 min, t (major) = 26.34 min]; *Z:E* = 11:1; **<sup>1</sup>H NMR** (300 MHz, CDCl<sub>3</sub>):  $\delta$  (ppm) 7.74 (d, *J* = 8.1 Hz, 1H), 7.39 (d, *J* = 7.7 Hz, 1H), 7.24-7.18 (m, 1H), 7.08-7.03 (m, 1H), 6.85 (d, *J* = 4.2 Hz, 3H), 5.33 (d, *J* = 15.7 Hz, 1H), 5.05 (d, *J* = 15.6 Hz, 1H), 4.03 (d, *J* = 12.6 Hz, 1H), 3.72 (s, 3H), 3.66 (d, *J* = 1.3 Hz, 1H), 2.21 (s, 6H), 2.08 (s, 3H), 1.59 (s, 9H); **<sup>13</sup>C NMR** (75 MHz, CDCl<sub>3</sub>):  $\delta$  (ppm) 172.9, 166.1, 155.1, 149.2, 138.5, 138.4, 138.1, 129.7, 128.6, 125.5, 124.4, 123.9, 123.7, 123.5, 114.5, 84.4, 78.1, 54.9, 52.8, 42.9, 29.7, 28.1, 25.7, 21.5; **ESI-HRMS**: calcd.

for  $C_{28}H_{32}N_2O_7+H^+$  509.2282, found 509.2302.

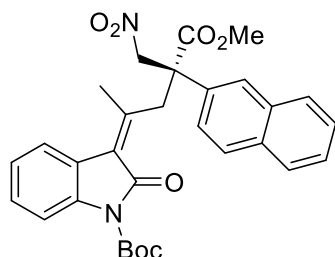

(*S,Z*)-tert-butyl 3-(5-methoxy-4-(naphthalen-2-yl)-4-(nitromethyl)-5-oxopentan-2-ylidene)-2-oxoindoline-1-carboxylate (**4i**): 86% yield; Yellow solid;  $[\alpha]_D^{27} = +92$  ( $c = 1.00$  in  $CHCl_3$ ); 92% ee, determined by HPLC analysis [Daicel chiralpak IC-H, n-hexane/*i*-PrOH = 90/10, 1.0 mL/min,  $\lambda = 254$  nm,  $t$  (minor) = 32.11 min,  $t$  (major) = 41.13 min];  $Z:E = 18:1$ ;  **$^1H$  NMR** (300 MHz,  $CDCl_3$ ):  $\delta$  (ppm) 7.77-7.68 (m, 5H), 7.50 (d,  $J = 8.6$  Hz, 1H), 7.39 (dd,  $J = 6.1, 3.1$  Hz, 2H), 7.34 (d,  $J = 7.8$  Hz, 1H), 7.20 (t,  $J = 8.0$  Hz, 1H), 7.02 (t,  $J = 7.6$  Hz, 1H), 5.45 (d,  $J = 15.6$  Hz, 1H), 5.17 (d,  $J = 15.7$  Hz, 1H), 4.19 (d,  $J = 12.7$  Hz, 1H), 3.75 (s, 3H), 3.68 (d,  $J = 26.8$  Hz, 1H), 2.04 (s, 3H), 1.58 (s, 9H);  **$^{13}C$  NMR** (75 MHz,  $CDCl_3$ ):  $\delta$  (ppm) 172.8, 166.2, 154.5, 149.1, 138.2, 136.0, 133.0, 132.5, 128.7, 128.3, 127.5, 126.6, 125.8, 125.4, 124.5, 124.2, 123.9, 123.3, 114.6, 84.6, 78.1, 55.3, 53.0, 43.1, 28.2, 25.7; **ESI-HRMS**: calcd. for  $C_{30}H_{30}N_2O_7+Na^+$  553.1945, found 553.1967.

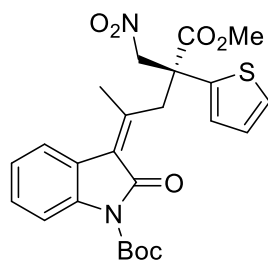

(*S,Z*)-tert-butyl 3-(5-methoxy-4-(nitromethyl)-5-oxo-4-(thiophen-2-yl)pentan-2-ylidene)-2-oxoindoline-1-carboxylate (**4j**): 29% yield; Yellow oil;  $[\alpha]_D^{27} = +16$  ( $c = 1.00$  in  $CHCl_3$ ); 86% ee, determined by HPLC analysis [Daicel chiralpak IC-H, n-hexane/*i*-PrOH = 80/20, 1.0 mL/min,  $\lambda = 254$  nm,  $t$  (minor) = 16.91 min,  $t$  (major) = 27.45 min];  $Z:E = 6:1$ ;  **$^1H$  NMR** (300 MHz,  $CDCl_3$ ):  $\delta$  (ppm) 7.82 (d,  $J = 8.1$  Hz, 1H), 7.48 (d,  $J = 7.8$  Hz, 1H), 7.30-7.26 (m, 2H), 7.18-7.13 (m, 1H), 7.06 (d,  $J = 3.1$  Hz, 1H), 6.97-6.94 (m, 1H), 5.48 (d,  $J = 15.7$  Hz, 1H), 5.19 (d,  $J = 15.6$  Hz, 1H), 4.04 (d,  $J = 12.4$  Hz, 1H), 3.86 (s, 3H), 3.75 (d,  $J = 12.9$  Hz, 1H), 2.05 (s, 3H), 1.67 (s, 9H);  **$^{13}C$  NMR** (75 MHz,  $CDCl_3$ ):  $\delta$  (ppm) 173.9, 167.9, 154.2, 151.0, 142.7, 140.4, 131.0, 128.4, 128.3, 127.9, 127.3, 126.6, 126.0, 125.2, 116.7, 86.7, 80.7, 55.3, 54.8, 47.1, 30.2, 27.1; **ESI-HRMS**:

calcd. for C<sub>24</sub>H<sub>26</sub>N<sub>2</sub>O<sub>7</sub>S+Na<sup>+</sup> 509.1353, found 509.1366

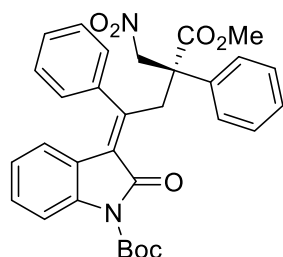

(*S,E*)-tert-butyl 3-(4-methoxy-3-(nitromethyl)-4-oxo-1,3-diphenylbutylidene)-2-oxoindoline-1-carboxylate (**4k**): 87% yield; Yellow solid;  $[\alpha]_{\text{D}}^{27} = -10$  ( $c = 1.00$  in CHCl<sub>3</sub>); 97% ee, determined by HPLC analysis [Daicel chiralpak IC-H, n-hexane/*i*-PrOH = 90/10, 1.0 mL/min,  $\lambda = 254$  nm,  $t$  (minor) = 35.95 min,  $t$  (major) = 40.69 min]; *Z:E* > 20:1; **<sup>1</sup>H NMR** (300 MHz, CDCl<sub>3</sub>):  $\delta$  (ppm) 7.71 (d,  $J = 8.1$  Hz, 1H), 7.43 (m, 2H), 7.42-7.34 (m, 3H), 7.33-7.27 (m, 2H), 7.25-7.20 (d, 1H), 7.20-7.10 (m, 2H), 7.04 (s, 1H), 6.70-6.65 (m, 1H), 5.99 (d,  $J = 7.3$  Hz, 1H), 5.24 (d,  $J = 15.1$  Hz, 1H), 5.07 (d,  $J = 11.7$  Hz, 1H), 5.02 (d,  $J = 10.3$  Hz, 1H), 3.69 (d,  $J = 13.7$  Hz, 1H), 3.35 (s, 3H), 1.70 (s, 9H); **<sup>13</sup>C NMR** (75 MHz, CDCl<sub>3</sub>):  $\delta$  (ppm) 171.8, 166.4, 153.5, 148.8, 139.3, 138.4, 138.1, 129.3, 129.2, 128.8, 128.4, 128.2, 127.7, 126.9, 126.6, 123.4, 123.1, 122.3, 114.3, 84.6, 78.3, 54.7, 52.3, 40.8, 28.1; **ESI-HRMS**: calcd. for C<sub>31</sub>H<sub>30</sub>N<sub>2</sub>O<sub>7</sub>+Na<sup>+</sup> 565.1945, found 565.1958.

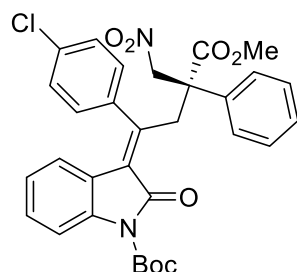

(*S,E*)-tert-butyl 3-(1-(4-chlorophenyl)-4-methoxy-3-(nitromethyl)-4-oxo-3-phenylbutylidene)-2-oxoindoline-1-carboxylate (**4l**): 86% yield; Yellow oil;  $[\alpha]_{\text{D}}^{27} = -4$  ( $c = 1.00$  in CHCl<sub>3</sub>); 95% ee, determined by HPLC analysis [Daicel chiralpak IC-H, n-hexane/*i*-PrOH = 90/10, 1.0 mL/min,  $\lambda = 254$  nm,  $t$  (minor) = 29.32 min,  $t$  (major) = 35.51 min]; *Z:E* > 20:1; **<sup>1</sup>H NMR** (300 MHz, CDCl<sub>3</sub>):  $\delta$  (ppm) 7.65 (d,  $J = 8.1$  Hz, 1H), 7.27 (d,  $J = 8.7$  Hz, 2H), 7.22-7.08 (m, 5H), 7.10 (dd,  $J = 11.6$ , 4.3 Hz, 1H), 7.01 (d,  $J = 7.2$  Hz, 1H), 6.79 (d,  $J = 7.6$  Hz, 1H), 6.64 (dd,  $J = 11.3$ , 4.2 Hz, 1H), 6.00 (d,  $J = 7.6$  Hz, 1H), 5.16-5.04 (m, 2H), 4.77 (d,  $J = 13.7$  Hz, 1H), 3.70 (d,  $J = 13.7$  Hz, 1H), 3.38 (s, 3H), 1.61 (s, 9H); **<sup>13</sup>C NMR** (75 MHz, CDCl<sub>3</sub>):  $\delta$  (ppm) 171.8, 166.3, 152.1, 148.9, 138.6, 138.0, 137.8, 137.3, 135.1, 129.6, 129.0, 128.5, 127.8, 126.9, 126.1, 123.6, 123.1, 122.1, 114.6,

84.8, 78.7, 54.8, 52.6, 40.7, 28.2; **ESI-HRMS**: calcd. for C<sub>31</sub>H<sub>29</sub>ClN<sub>2</sub>O<sub>7</sub>+Na<sup>+</sup> 599.1556, found 599.1569.

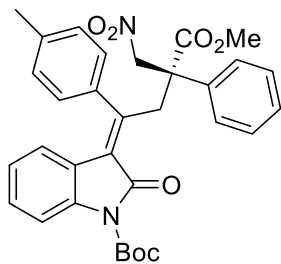

(*S,E*)-tert-butyl 3-(4-methoxy-3-(nitromethyl)-4-oxo-3-phenyl-1-(*p*-tolyl)butylidene)-2-oxoindoline-1-carboxylate (**4m**): 82% yield; Yellow solid;  $[\alpha]_D^{27} = -24$  ( $c = 1.00$  in CHCl<sub>3</sub>); 94% ee, determined by HPLC analysis [Daicel chiralpak OD-H, n-hexane/*i*-PrOH = 90/10, 0.5 mL/min,  $\lambda = 254$  nm,  $t$  (minor) = 15.05 min,  $t$  (major) = 16.84 min]; *Z:E* > 20:1; **<sup>1</sup>H NMR** (300 MHz, CDCl<sub>3</sub>):  $\delta$  (ppm) 7.63 (d,  $J = 8.2$  Hz, 1H), 7.33 (d,  $J = 7.0$  Hz, 2H), 7.23-7.14 (m, 4H), 7.11-7.05 (m, 2H), 6.90 (m, 2H), 6.62 (t,  $J = 7.7$  Hz, 1H), 6.04 (d,  $J = 7.8$  Hz, 1H), 5.15 (d,  $J = 15.1$  Hz, 1H), 4.97 (d,  $J = 7.9$  Hz, 1H), 4.92 (d,  $J = 6.4$  Hz, 1H), 3.58 (d,  $J = 13.7$  Hz, 1H), 3.28 (s, 3H), 2.35 (s, 3H), 1.61 (s, 9H); **<sup>13</sup>C NMR** (75 MHz, CDCl<sub>3</sub>):  $\delta$  (ppm) 171.9, 166.5, 154.0, 149.0, 139.5, 138.4, 136.3, 130.2, 129.6, 129.2, 128.4, 127.7, 127.1, 126.4, 126.2, 123.5, 123.2, 122.6, 114.4, 84.7, 78.3, 54.8, 52.4, 41.0, 28.2, 21.4; **ESI-HRMS**: calcd. for C<sub>32</sub>H<sub>32</sub>N<sub>2</sub>O<sub>7</sub>+Na<sup>+</sup> 579.2102, found 579.2119.

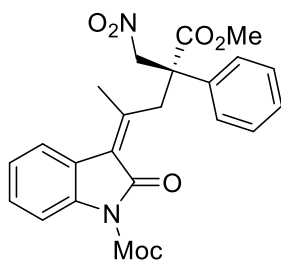

(*S,Z*)-methyl 3-(5-methoxy-4-(nitromethyl)-5-oxo-4-phenylpentan-2-ylidene)-2-oxoindoline-1-carboxylate (**4p**): 45% yield; Yellow oil;  $[\alpha]_D^{27} = +225$  ( $c = 1.00$  in CHCl<sub>3</sub>); 85% ee, determined by HPLC analysis [Daicel chiralpak IC-H, n-hexane/*i*-PrOH = 80/20, 1.0 mL/min,  $\lambda = 254$  nm,  $t$  (minor) = 38.27 min,  $t$  (major) = 53.22 min]; *Z:E* = 9:1; **<sup>1</sup>H NMR** (300 MHz, CDCl<sub>3</sub>):  $\delta$  (ppm) 7.85 (d,  $J = 8.1$  Hz, 1H), 7.38 (d,  $J = 7.7$  Hz, 1H), 7.30-7.25 (m, 4H), 7.24-7.18 (m, 2H), 7.07 (t,  $J = 7.5$  Hz, 1H), 5.33 (d,  $J = 15.6$  Hz, 1H), 5.06 (d,  $J = 15.6$  Hz, 1H), 4.10 (d,  $J = 12.7$  Hz, 1H), 3.94 (s, 3H), 3.73 (s, 3H), 3.65 (d,  $J = 12.7$  Hz, 1H), 2.09 (s, 3H); **<sup>13</sup>C NMR** (75 MHz, CDCl<sub>3</sub>):  $\delta$

(ppm)171.5, 164.7, 154.5, 150.4, 137.3, 136.6, 127.8, 127.7, 127.0, 125.2, 124.3, 123.3, 123.2, 122.4, 113.6, 77.1, 52.8, 51.8, 41.8, 28.6, 24.4; **ESI-HRMS**: calcd. for  $C_{23}H_{22}N_2O_7+Na^+$  461.1319, found 461.1320.

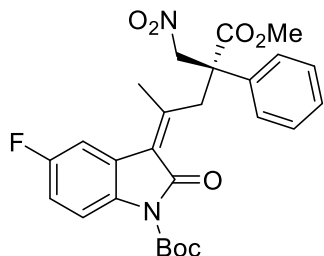

(*S,Z*)-tert-butyl 5-fluoro-3-(5-methoxy-4-(nitromethyl)-5-oxo-4-phenylpentan-2-ylidene)-2-oxoindoline-1-carboxylate (**4q**): 62% yield; Yellow solid;  $[\alpha]_D^{27} = +39$  ( $c = 1.00$  in  $CHCl_3$ ); 97% ee, determined by HPLC analysis [Daicel chiralpak IC-H, n-hexane/*i*-PrOH = 80/20, 1.0 mL/min,  $\lambda = 254$  nm,  $t$  (minor) = 13.31 min,  $t$  (major) = 17.85 min]; *Z:E* = 13:1; **<sup>1</sup>H NMR** (300 MHz,  $CDCl_3$ ):  $\delta$  (ppm) 7.70 (dd,  $J = 9.0, 4.9$  Hz, 1H), 7.29-7.27 (m, 4H), 7.23-7.19 (m, 1H), 7.10 (dd,  $J = 9.3, 2.5$  Hz, 1H), 6.92 (td,  $J = 8.8, 2.6$  Hz, 1H), 5.35 (d,  $J = 15.6$  Hz, 1H), 5.05 (d,  $J = 15.7$  Hz, 1H), 4.10 (d,  $J = 12.7$  Hz, 1H), 3.74 (s, 3H), 3.68 (d,  $J = 12.6$  Hz, 1H), 2.07 (s, 3H), 1.58 (s, 9H); **<sup>13</sup>C NMR** (75 MHz,  $CDCl_3$ ):  $\delta$  (ppm) 172.7, 165.9, 159.3 ( $J_{C-F} = 240$  Hz), 156.9, 148.2, 138.4, 134.1, 134.1, 129.0, 128.2, 126.2, 125.2 ( $J_{C-F} = 3.0$  Hz), 124.5 ( $J_{C-F} = 9.0$  Hz), 115.6 ( $J_{C-F} = 8.3$  Hz), 114.9 ( $J_{C-F} = 23.3$  Hz), 111.8 ( $J_{C-F} = 25.5$  Hz), 84.7, 78.2, 55.3, 52.9, 42.9, 28.1, 25.4; **<sup>19</sup>F NMR** (282 MHz,  $CDCl_3$ )  $\delta$  (ppm) -118.3; **ESI-HRMS**: calcd. for  $C_{26}H_{27}FN_2O_7+Na^+$  521.1695, found 521.1711.

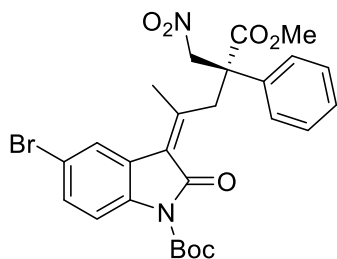

(*S,Z*)-tert-butyl 5-bromo-3-(5-methoxy-4-(nitromethyl)-5-oxo-4-phenylpentan-2-ylidene)-2-oxoindoline-1-carboxylate (**4r**): 51% yield; Yellow oil liquid;  $[\alpha]_D^{27} = +8$  ( $c = 1.00$  in  $CHCl_3$ ); 97% ee, determined by HPLC analysis [Daicel chiralpak IC-H, n-hexane/*i*-PrOH = 80/20, 1.0 mL/min,  $\lambda = 254$  nm,  $t$  (minor) = 16.22 min,  $t$  (major) = 20.20 min]; *Z:E* = 9:1; **<sup>1</sup>H NMR** (300 MHz,  $CDCl_3$ ):  $\delta$  (ppm) 7.63 (d,  $J = 8.7$  Hz, 1H), 7.49 (d,  $J = 1.8$  Hz, 1H), 7.34 (dd,  $J = 8.7, 1.9$  Hz,

1H), 7.29-7.24 (m, 4H), 7.22-7.19 (m, 1H), 5.34 (d,  $J = 15.7$  Hz, 1H), 5.05 (d,  $J = 15.6$  Hz, 1H), 4.08 (d,  $J = 12.7$  Hz, 1H), 3.75 (s, 3H), 3.70 (d,  $J = 12.7$  Hz, 1H), 2.09 (s, 3H), 1.59 (s, 9H);  $^{13}\text{C}$  NMR (75 MHz,  $\text{CDCl}_3$ ):  $\delta$  (ppm) 172.6, 165.5, 157.2, 148.8, 138.4, 137.0, 131.3, 129.0, 128.2, 127.1, 126.2, 126.0, 125.1, 124.7, 116.1, 84.9, 78.2, 55.3, 52.9, 42.9, 28.1, 25.7 ; **ESI-HRMS**: calcd. for  $\text{C}_{26}\text{H}_{27}\text{BrN}_2\text{O}_7+\text{Na}^+$  581.0894, found 581.0910.

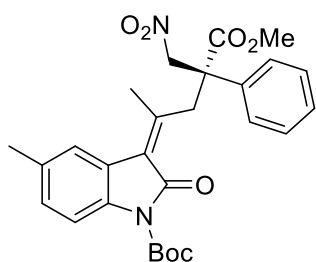

(*S,Z*)-tert-butyl 3-(5-methoxy-4-(nitromethyl)-5-oxo-4-phenylpentan-2-ylidene)-5-methyl-2-oxindoline-1-carboxylate (**4s**): 81% yield; Yellow oil;  $[\alpha]_{\text{D}}^{27} = +66$  ( $c = 1.00$  in  $\text{CHCl}_3$ ); 94% ee, determined by HPLC analysis [Daicel chiralpak IC-H, n-hexane/*i*-PrOH = 80/20, 1.0 mL/min,  $\lambda = 254$  nm,  $t$  (minor) = 14.97 min,  $t$  (major) = 20.30 min];  $Z:E > 20:1$ ;  $^1\text{H}$  NMR (300 MHz,  $\text{CDCl}_3$ ):  $\delta$  (ppm) 7.67 (d,  $J = 8.3$  Hz, 1H), 7.42-7.36 (m, 3H), 7.33-7.28 (m, 3H), 7.11 (d,  $J = 8.2$  Hz, 1H), 5.44 (d,  $J = 15.7$  Hz, 1H), 5.13 (d,  $J = 15.7$  Hz, 1H), 4.23 (d,  $J = 12.7$  Hz, 1H), 3.83 (s, 3H), 3.68 (d,  $J = 12.7$  Hz, 1H), 2.35 (s, 3H), 2.18 (s, 3H), 1.67 (s, 3H);  $^{13}\text{C}$  NMR (75 MHz,  $\text{CDCl}_3$ ):  $\delta$  (ppm) 172.8, 166.5, 154.3, 149.1, 138.7, 135.9, 133.3, 129.2, 128.9, 128.0, 126.4, 125.8, 125.2, 123.4, 114.4, 84.4, 78.1, 55.2, 52.8, 43.2, 28.2, 25.6, 21.4; **ESI-HRMS**: calcd. for  $\text{C}_{27}\text{H}_{30}\text{N}_2\text{O}_7+\text{Na}^+$  517.1945, found 517.1959.

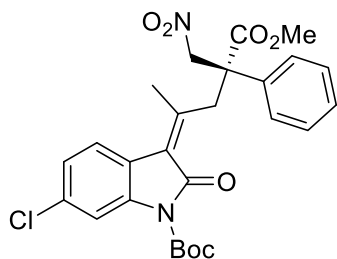

(*S,Z*)-tert-butyl 6-chloro-3-(5-methoxy-4-(nitromethyl)-5-oxo-4-phenylpentan-2-ylidene)-2-oxindoline-1-carboxylate (**4t**): 64% yield; Yellow oil;  $[\alpha]_{\text{D}}^{27} = +20$  ( $c = 1.00$  in  $\text{CHCl}_3$ ); 94% ee, determined by HPLC analysis [Daicel chiralpak IC-H, n-hexane/*i*-PrOH = 80/20, 1.0 mL/min,  $\lambda = 254$  nm,  $t$  (minor) = 15.55 min,  $t$  (major) = 19.58 min];  $Z:E = 14:1$ ;  $^1\text{H}$  NMR (300 MHz,  $\text{CDCl}_3$ ):  $\delta$  (ppm) 7.87 (d,  $J = 1.9$  Hz, 1H), 7.40-7.36 (m, 1H), 7.35-7.15 (m, 4H), 7.13-7.10 (m, 2H), 5.42 (d,

$J = 15.7$  Hz, 1H), 5.12 (d,  $J = 15.7$  Hz, 1H), 4.16 (d,  $J = 12.7$  Hz, 1H), 3.82 (s, 3H), 3.73 (d,  $J = 12.0$  Hz, 1H), 2.15 (s, 3H), 1.68 (s, 9H);  $^{13}\text{C NMR}$  (75 MHz,  $\text{CDCl}_3$ ):  $\delta$  (ppm) 172.7, 165.8, 155.7, 148.7, 138.8, 138.5, 134.4, 129.0, 128.1, 126.2, 125.1, 124.8, 123.9, 121.8, 115.3, 85.1, 78.2, 55.2, 52.9, 42.9, 28.1, 25.6; **ESI-HRMS**: calcd. for  $\text{C}_{26}\text{H}_{27}\text{ClN}_2\text{O}_7+\text{Na}^+$  537.1399, found 537.1414.

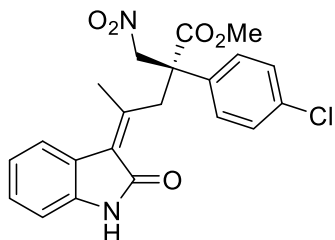

(*S,Z*)-methyl-2-(4-chlorophenyl)-2-(nitromethyl)-4-(2-oxoindolin-3-ylidene)pentanoate (**5**): 92% yield; Yellow solid;  $[\alpha]_{\text{D}}^{27} = +23$  ( $c = 1.00$  in  $\text{CHCl}_3$ ); 100% ee, determined by HPLC analysis [Daicel chiralpak IB-H, n-hexane/*i*-PrOH = 95/5, 1.0 mL/min,  $\lambda = 254$  nm,  $t$  (major) = 23.90 min]; *Z:E* > 20:1;  $^1\text{H NMR}$  (300 MHz,  $\text{CDCl}_3$ ):  $\delta$  (ppm) 8.55 (s, 1H), 7.39 (d,  $J = 8.0$  Hz, 1H), 7.37-7.29 (m, 4H), 7.24 (d,  $J = 7.8$  Hz, 1H), 7.02 (m, 1H), 6.95 (d,  $J = 7.7$  Hz, 1H), 5.35 (d,  $J = 15.7$  Hz, 1H), 5.10 (d,  $J = 15.7$  Hz, 1H), 4.07 (d,  $J = 12.7$  Hz, 1H), 3.87 (d,  $J = 12.7$  Hz, 1H), 3.83 (s, 3H), 2.02 (s, 3H);  $^{13}\text{C NMR}$  (75 MHz,  $\text{CDCl}_3$ ):  $\delta$  (ppm) 172.5, 169.5, 152.3, 139.8, 137.2, 134.1, 129.1, 128.9, 127.8, 127.4, 124.9, 123.5, 122.1, 109.9, 78.6, 54.2, 53.1, 42.2, 25.1; **ESI-HRMS**: calcd. for  $\text{C}_{21}\text{H}_{19}\text{ClN}_2\text{O}_5+\text{H}^+$  415.1055, found 415.1065.

## 5. In-situ ESI-HRMS analysis experiment

An ordinary vial equipped with a magnetic stirring bar was charged with  $\alpha$ -substituted  $\beta$ -nitroacrylates **1a** (0.1 mmol) and 3-alkylidene oxindole **2a** (0.15mmol) in toluene (0.4 mL), and then quinine-derived squaramide **3g** (6.3 mg, 10mol %) was added. After stirring for 12 hours at room temperature, the reaction mixture was directly injected to electrospray ionization high resolution mass spectrometry (ESI-HRMS).

### Using **3g** as catalyst

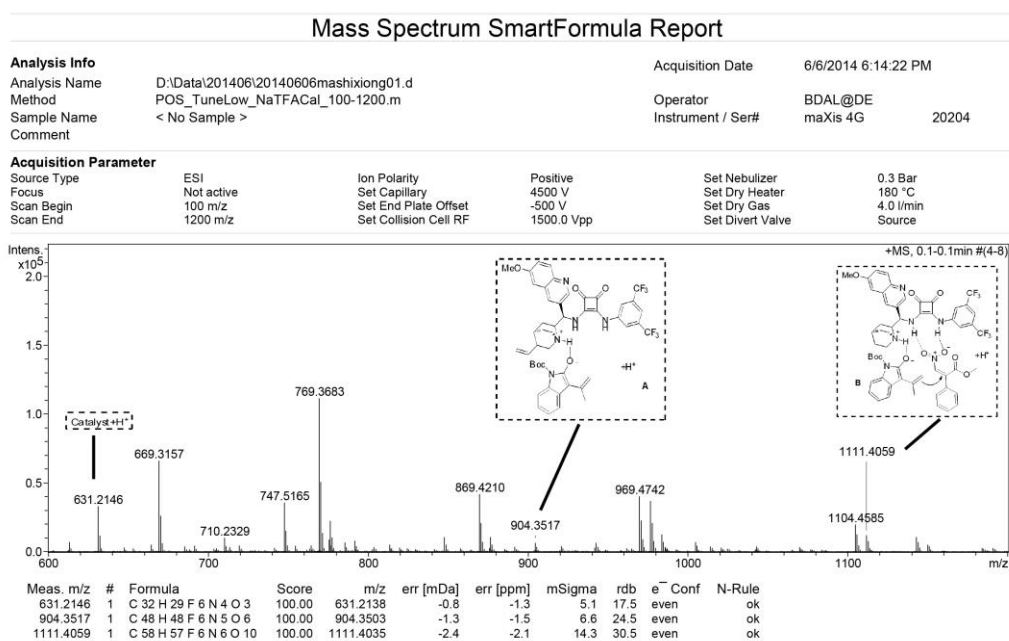



## 6. Reference

1. K. Mori, M. Wakazawa and T. Akiyama, *Chem. Sci.*, **2014**, 5, 1799.
2. (a) B. M. Trost, N. Cramer and S. M. Silverman, *J. Am. Chem. Soc.*, **2007**, 129, 12396. (b) G. Rassu, V. Zambrano, R. Tanca, A. Sartori, L. Battistini, F. Zanardi, C. Curti and G. Casiraghi, *Eur. J. Org. Chem.*, **2012**, 466.
3. (a) K. Asano and S. Matsubara, *J. Am. Chem. Soc.*, **2011**, 133, 16711. (b) M. X. Zhao, Z. W. Zhang, M. X. Chen, W. H. Tang and M. Shi, *Eur. J. Org. Chem.*, **2011**, 3001. (c) C. J. Wang, Z. H. Zhang, X. Q. Dong, X. J. Wu, *Chem. Comm.*, **2008**, 48, 1431. (d) B. Tan, N. R. Candeias, C. F. Barbas III, *Nat. Chem.*, **2011**, 3, 473. (e) Y. Zhu, J. P. Malerich, V. H. Rawal, *Angew. Chem. Int. Ed.*, **2010**, 49, 153. (f) W. Yang, D. M. Du, *Org. Lett.*, **2010**, 12, 5450.



# 8. <sup>1</sup>H and <sup>13</sup>C NMR Spectra of compounds 1b-1d, 1g, 1h, 2b, 2c, 4 and 5

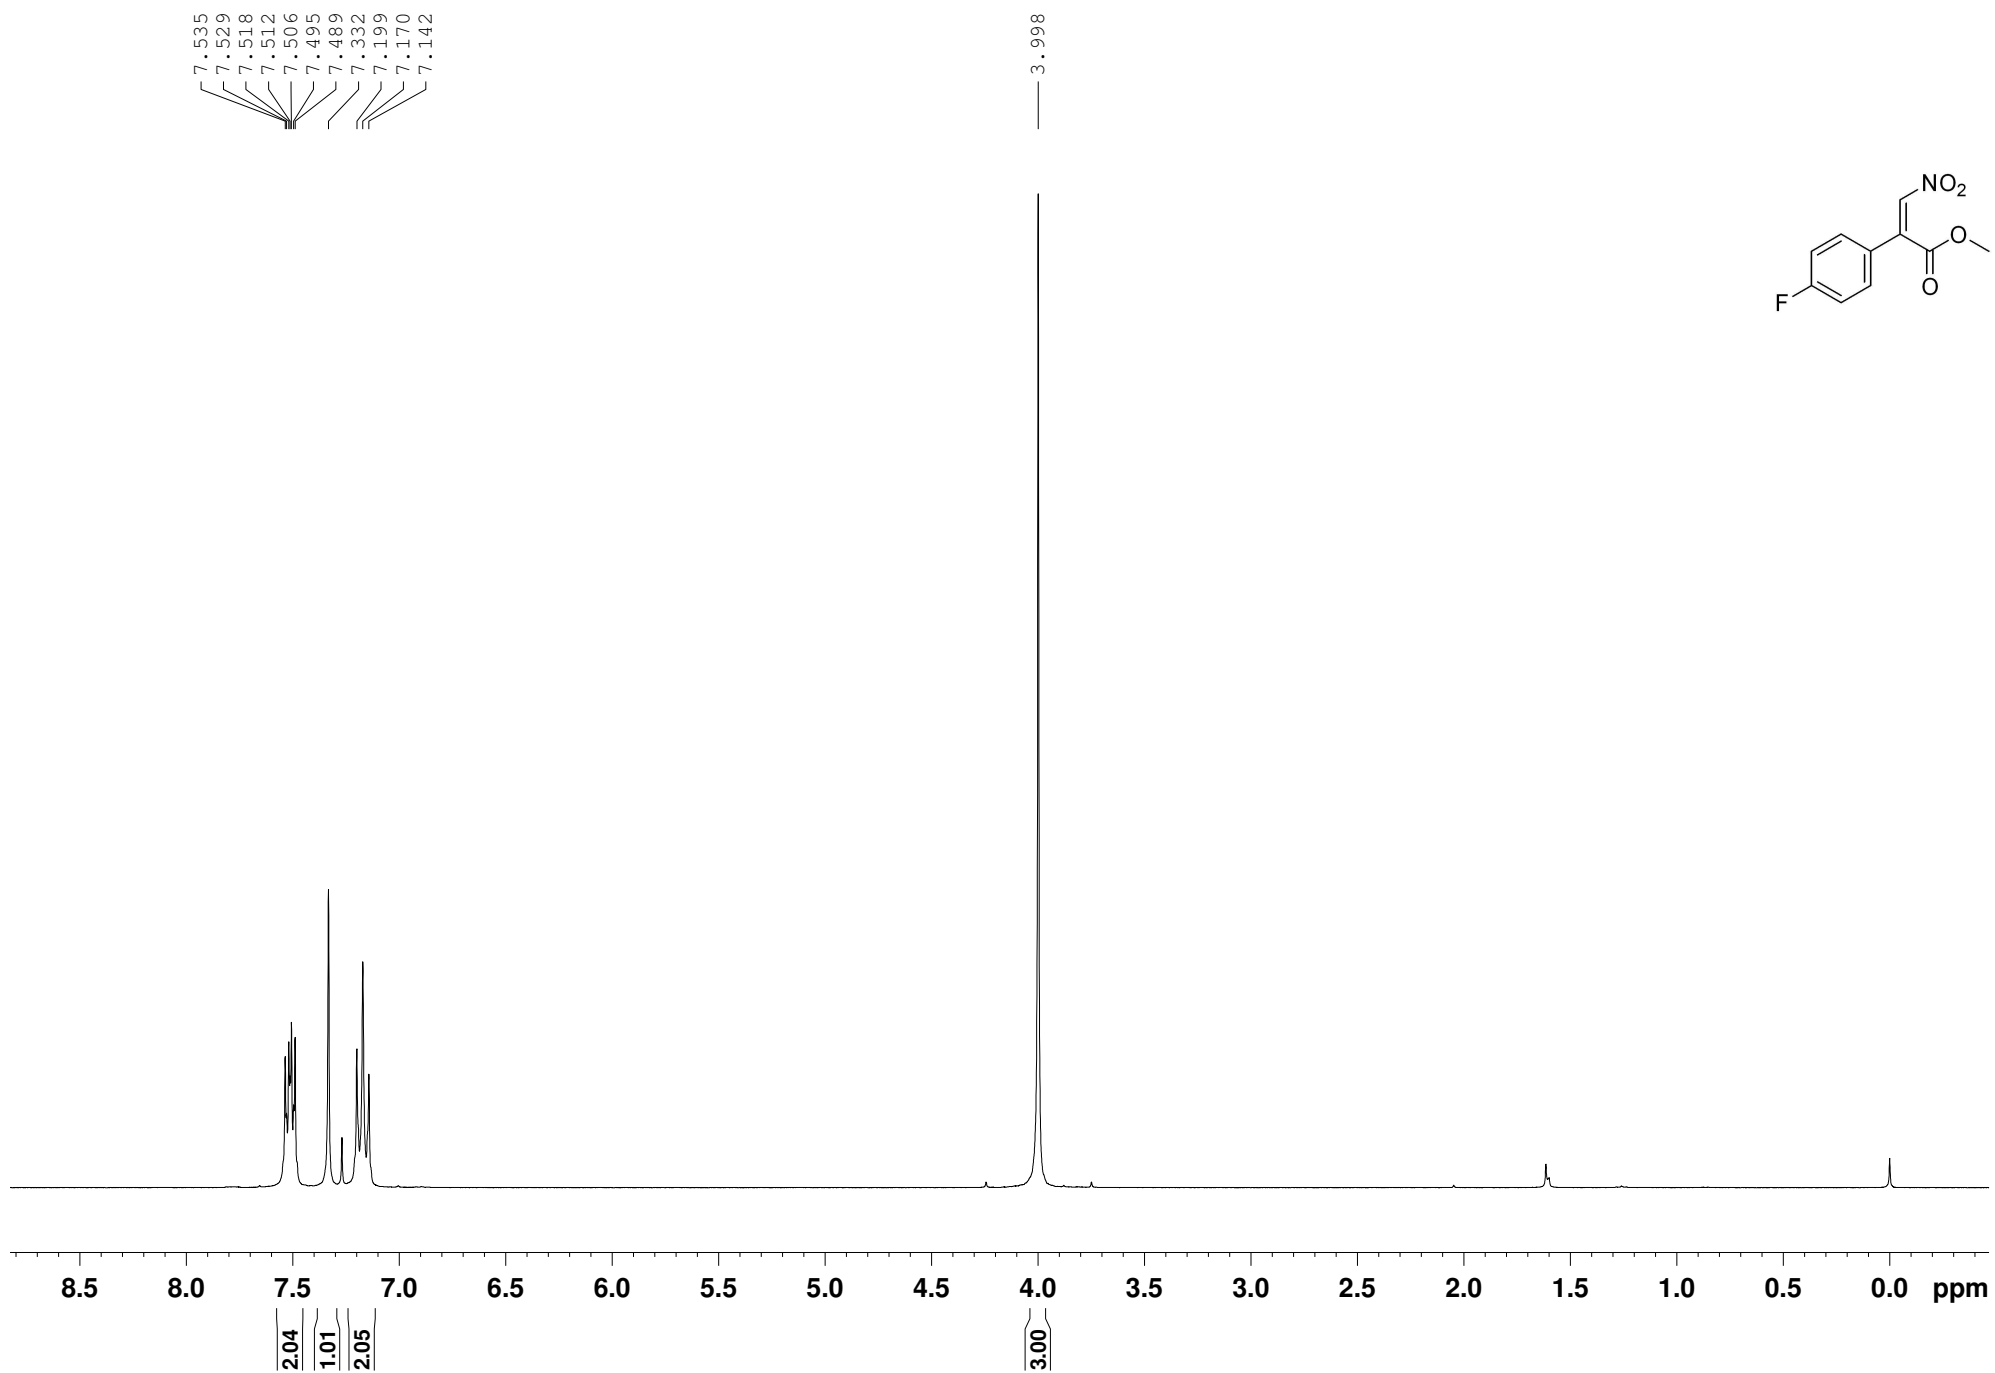

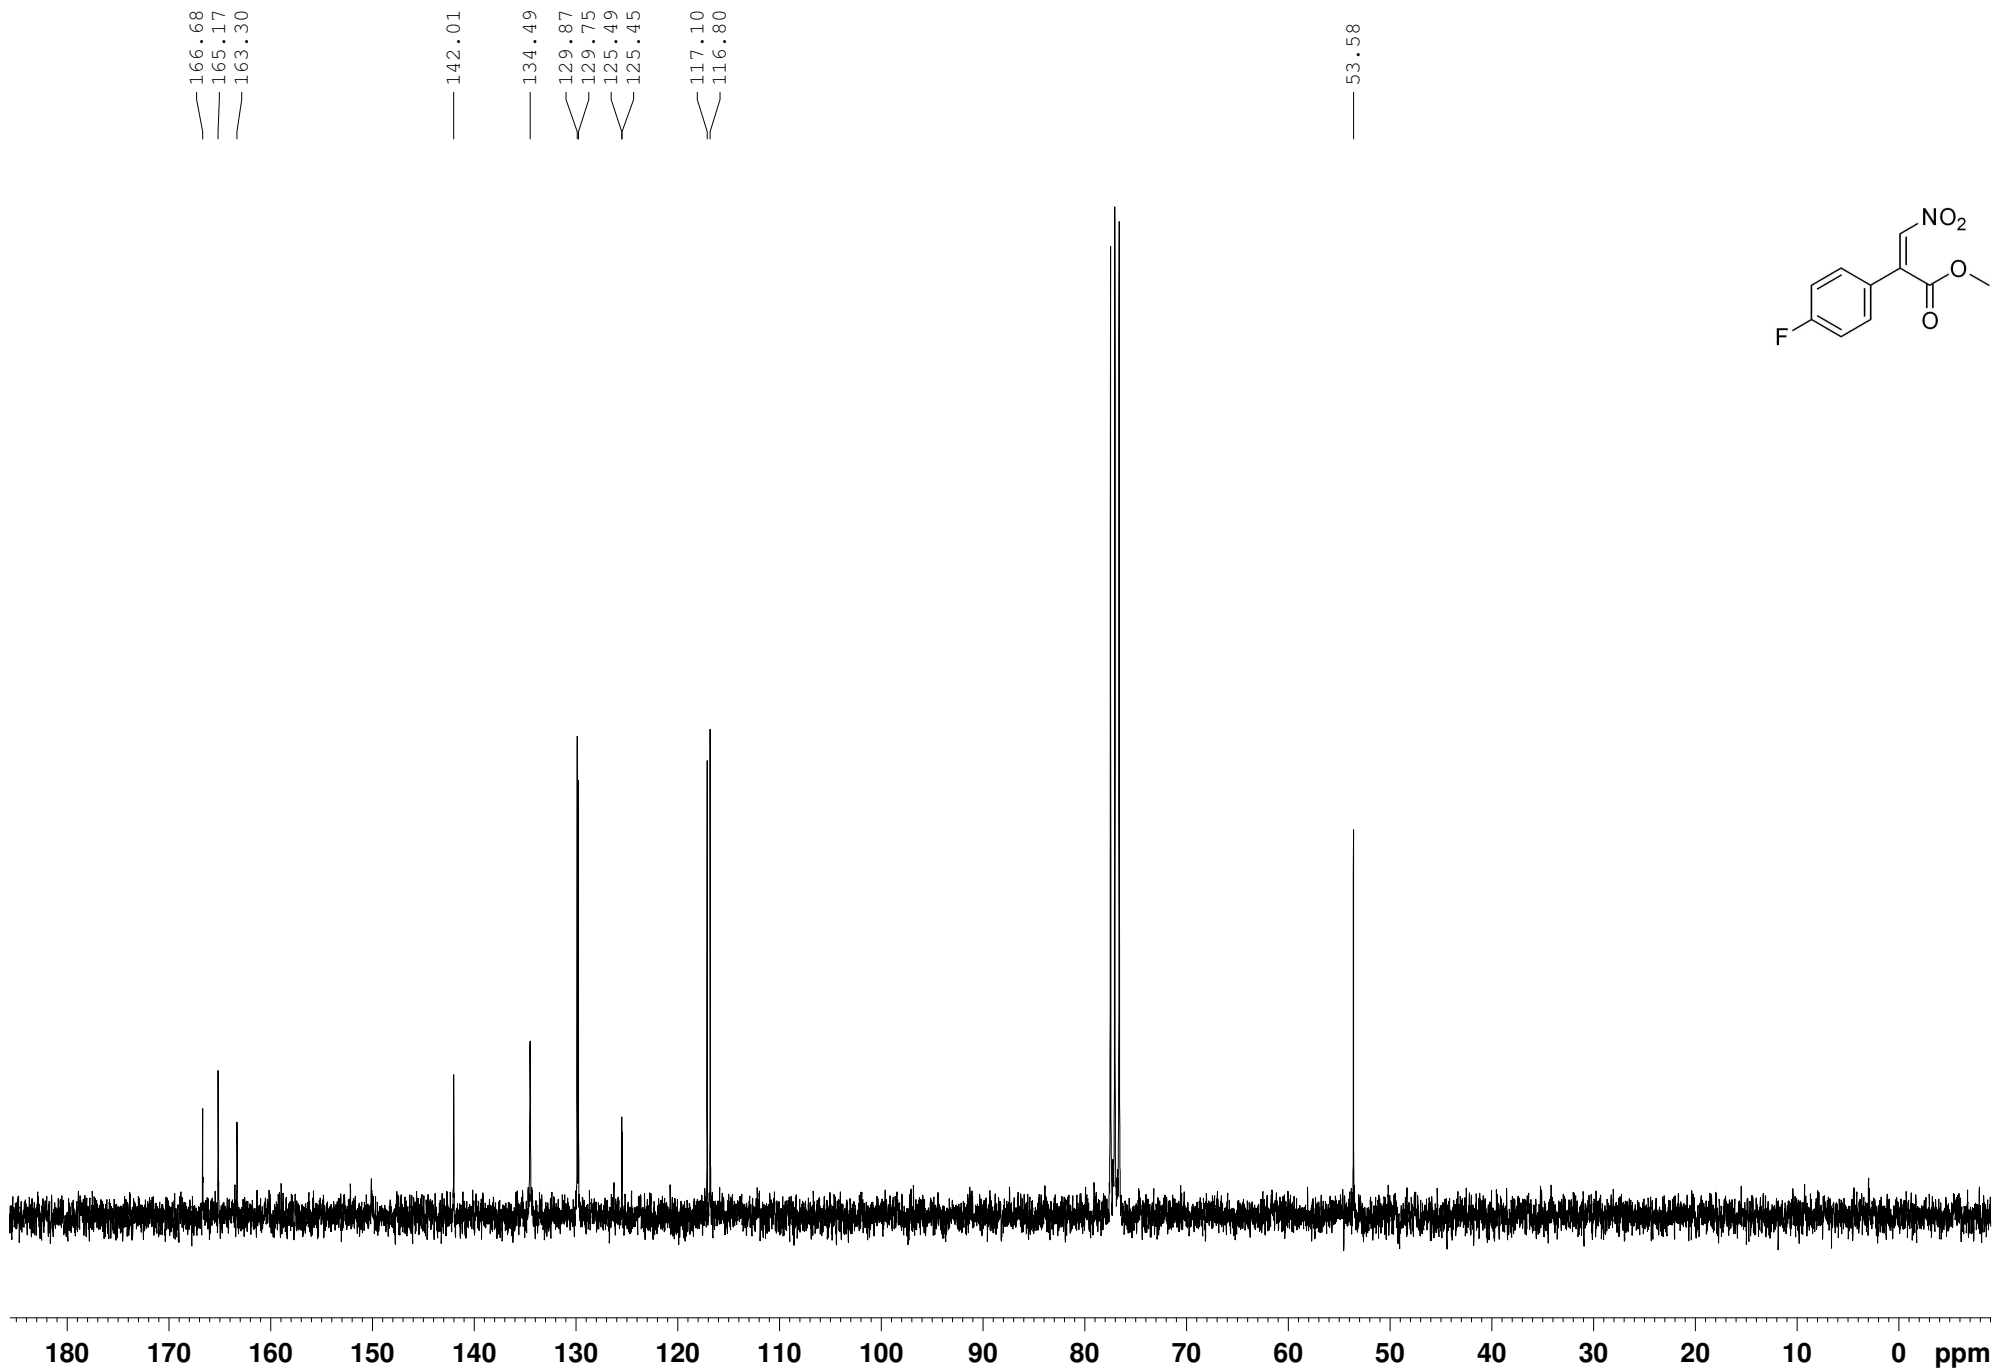

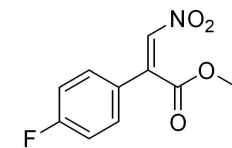

-105.844

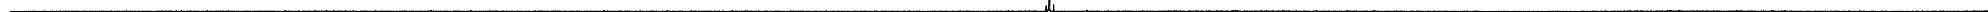

0

-20

-40

-60

-80

-100

-120

-140

-160

-180

-200

ppm

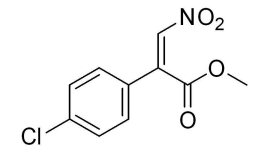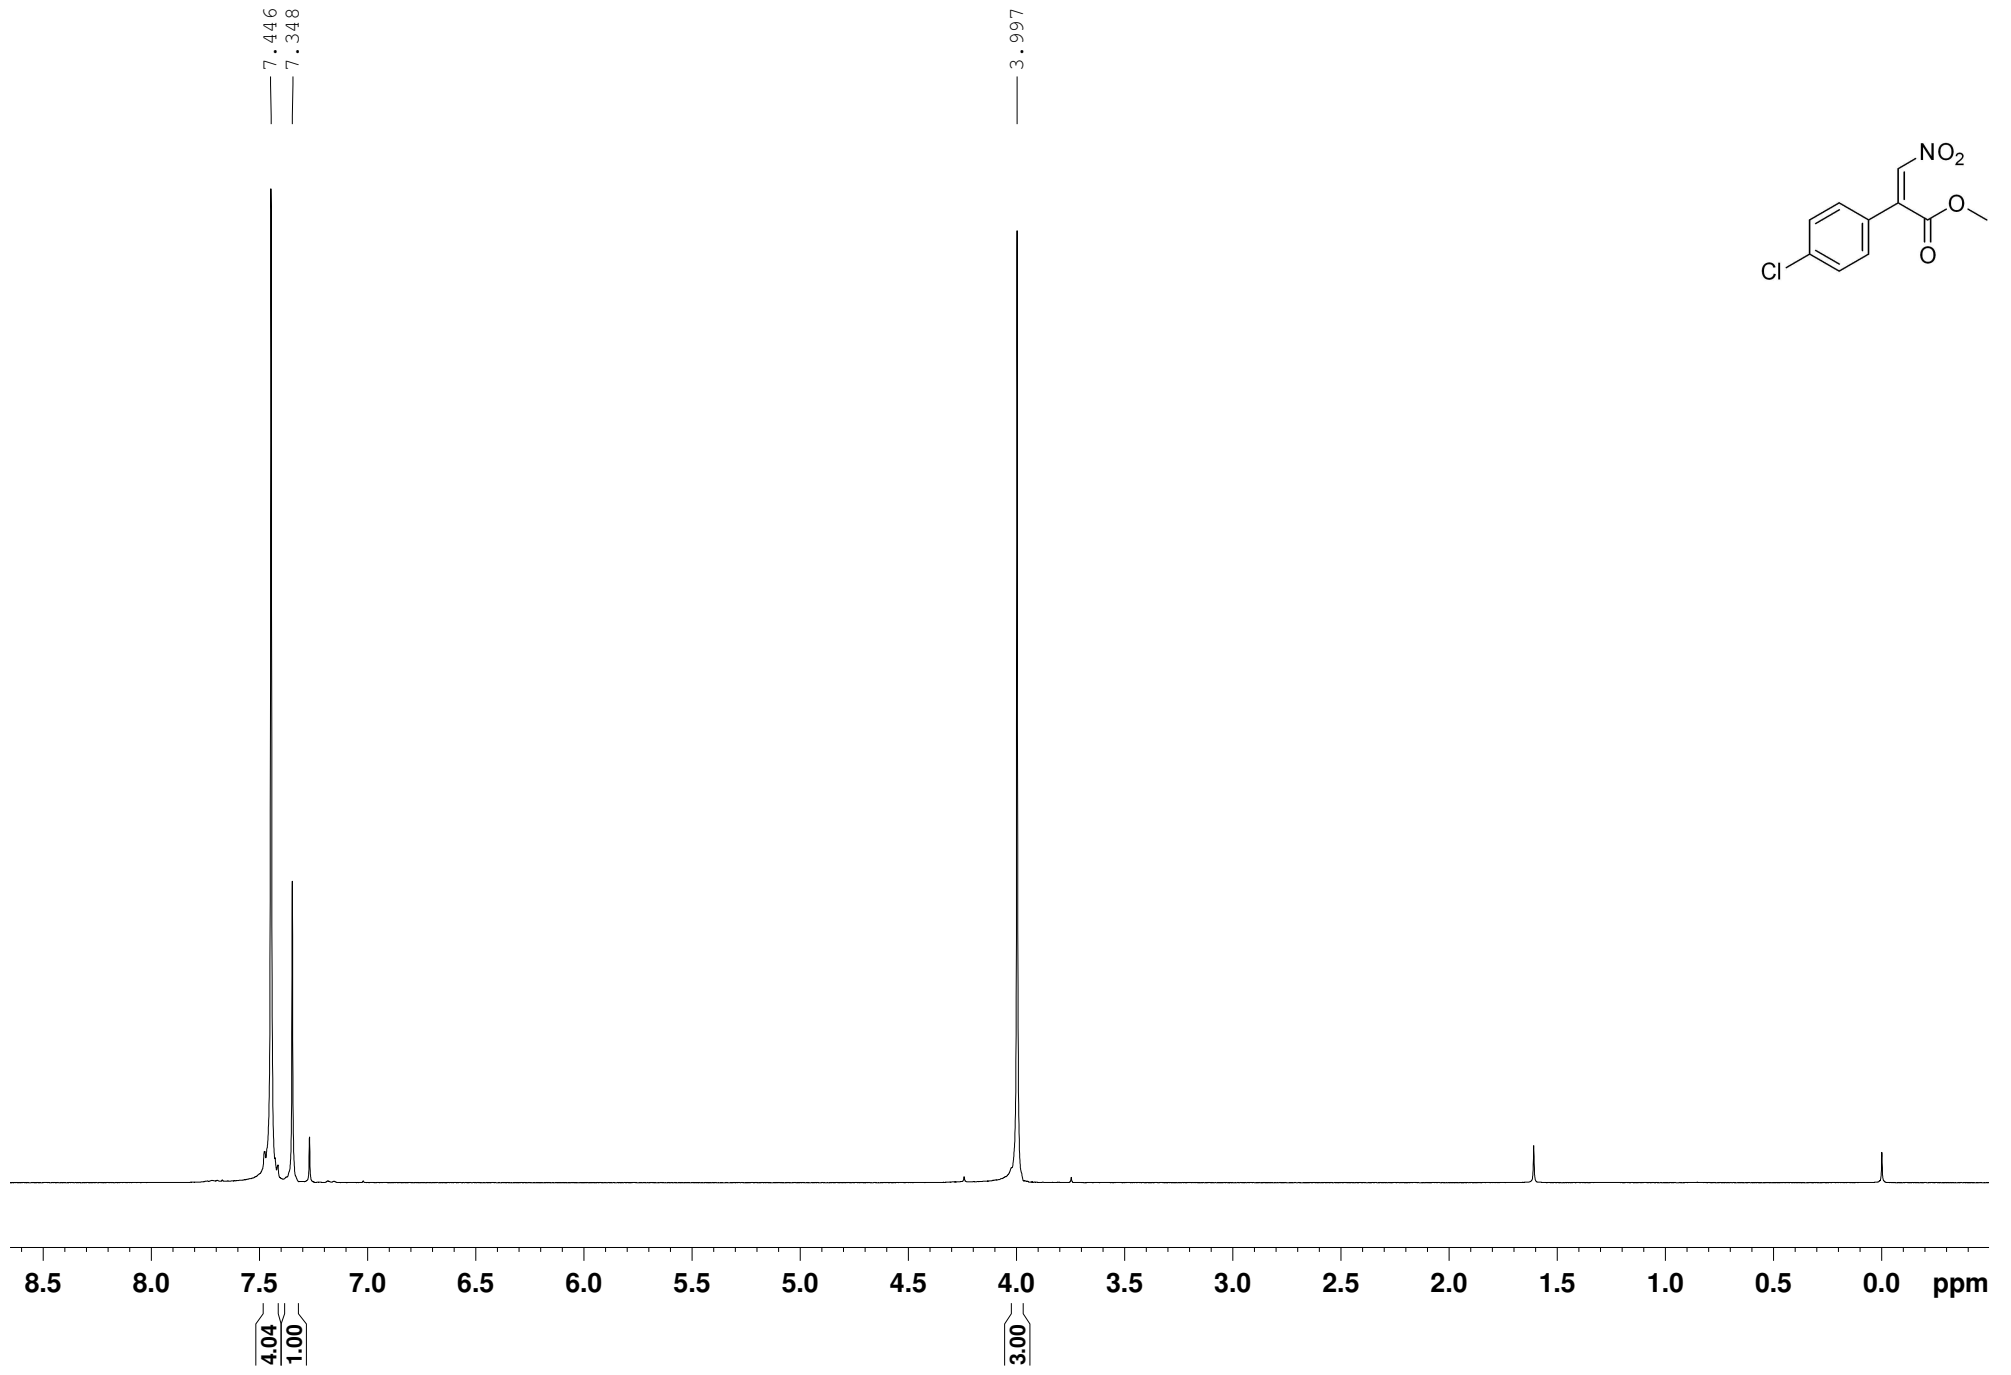

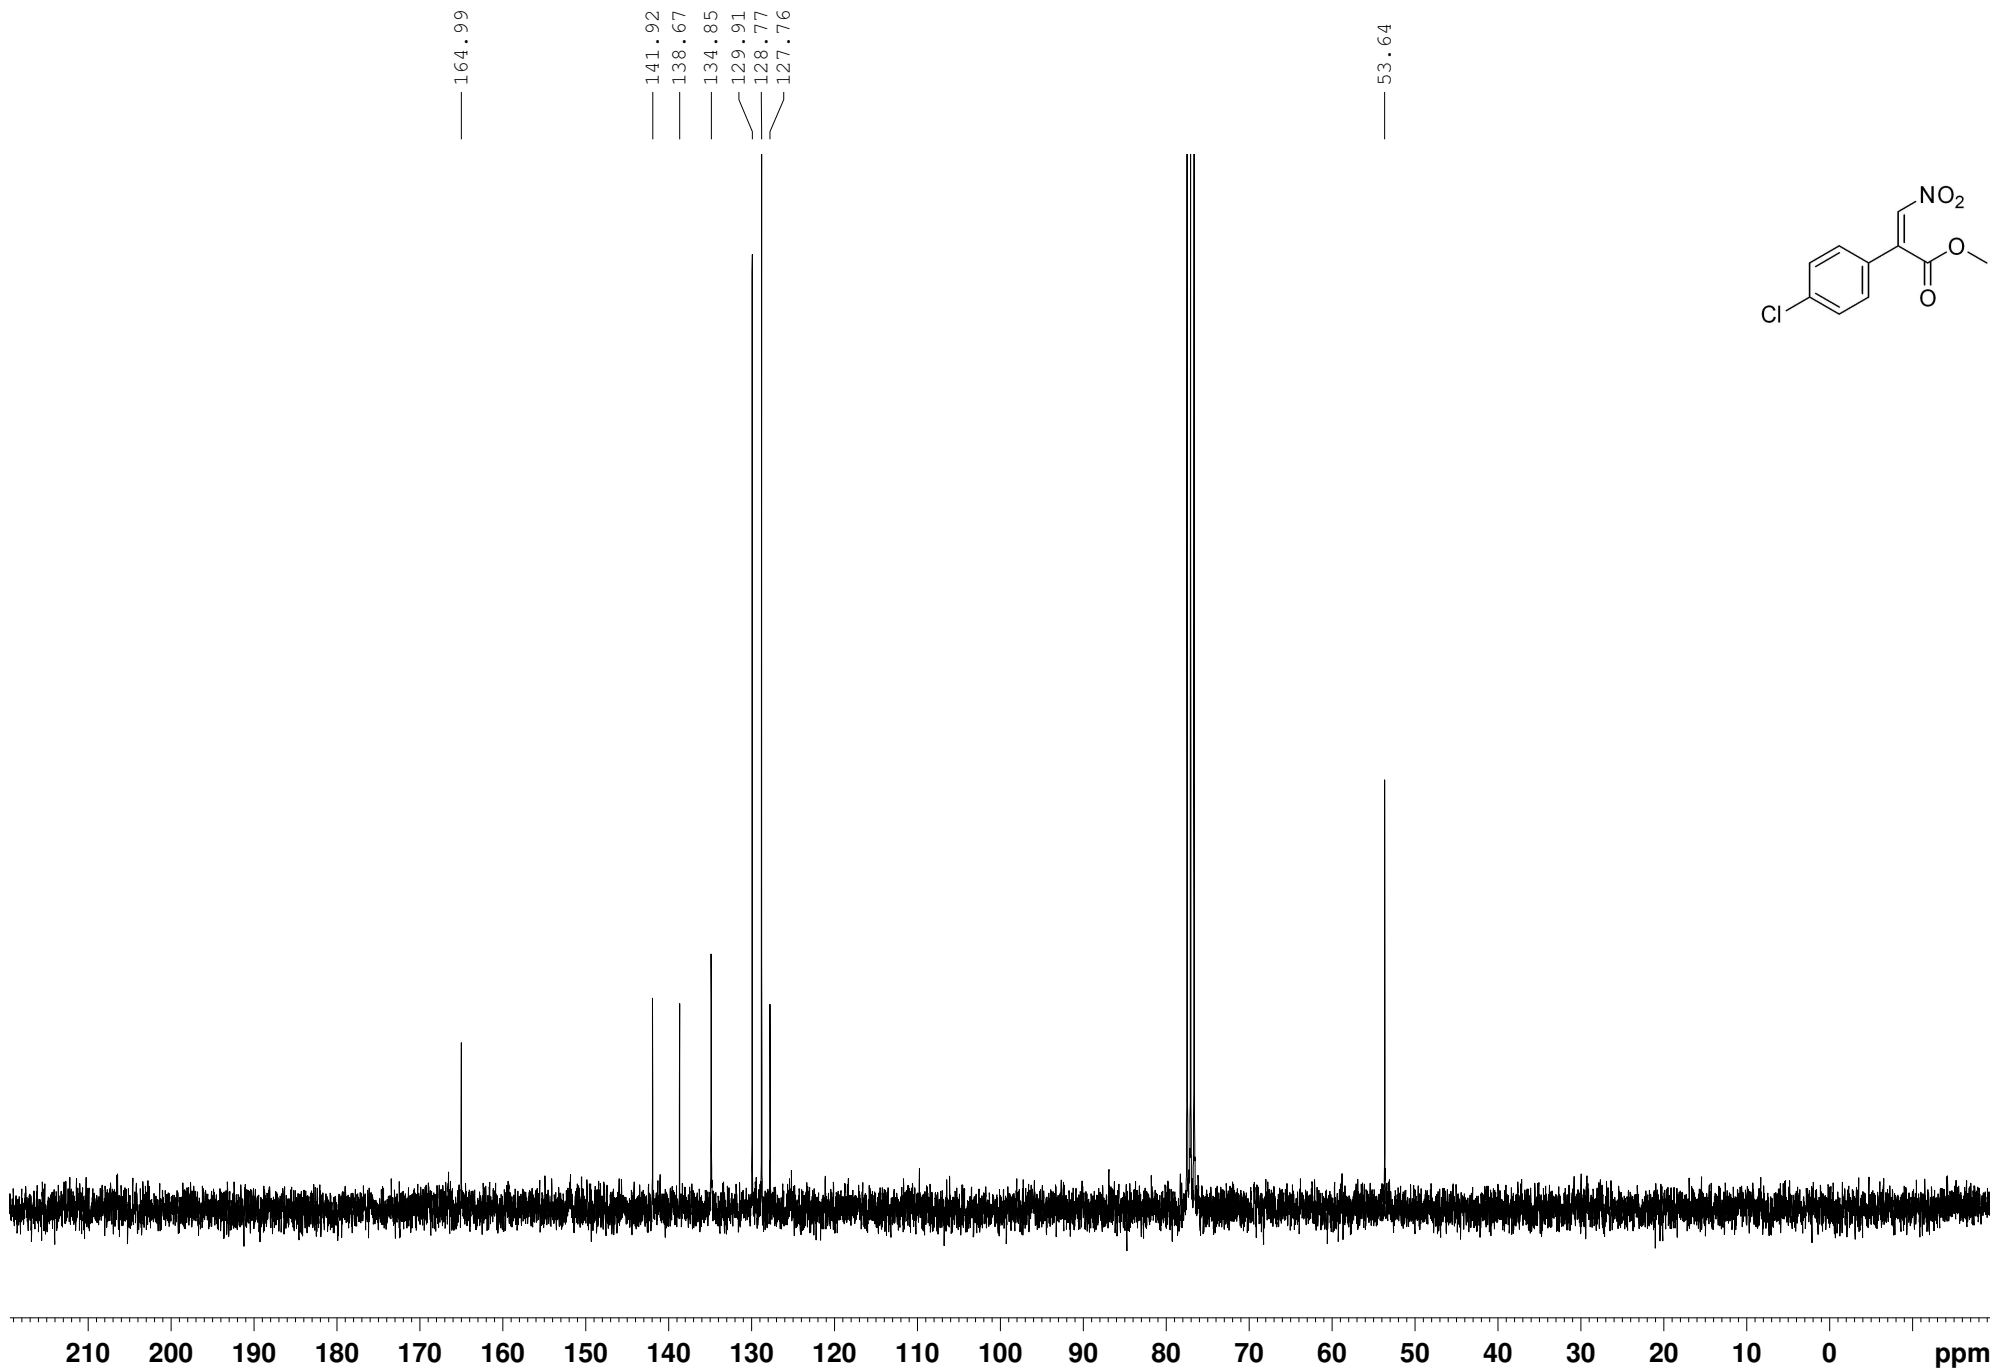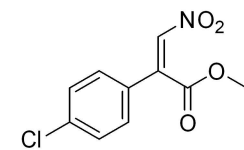

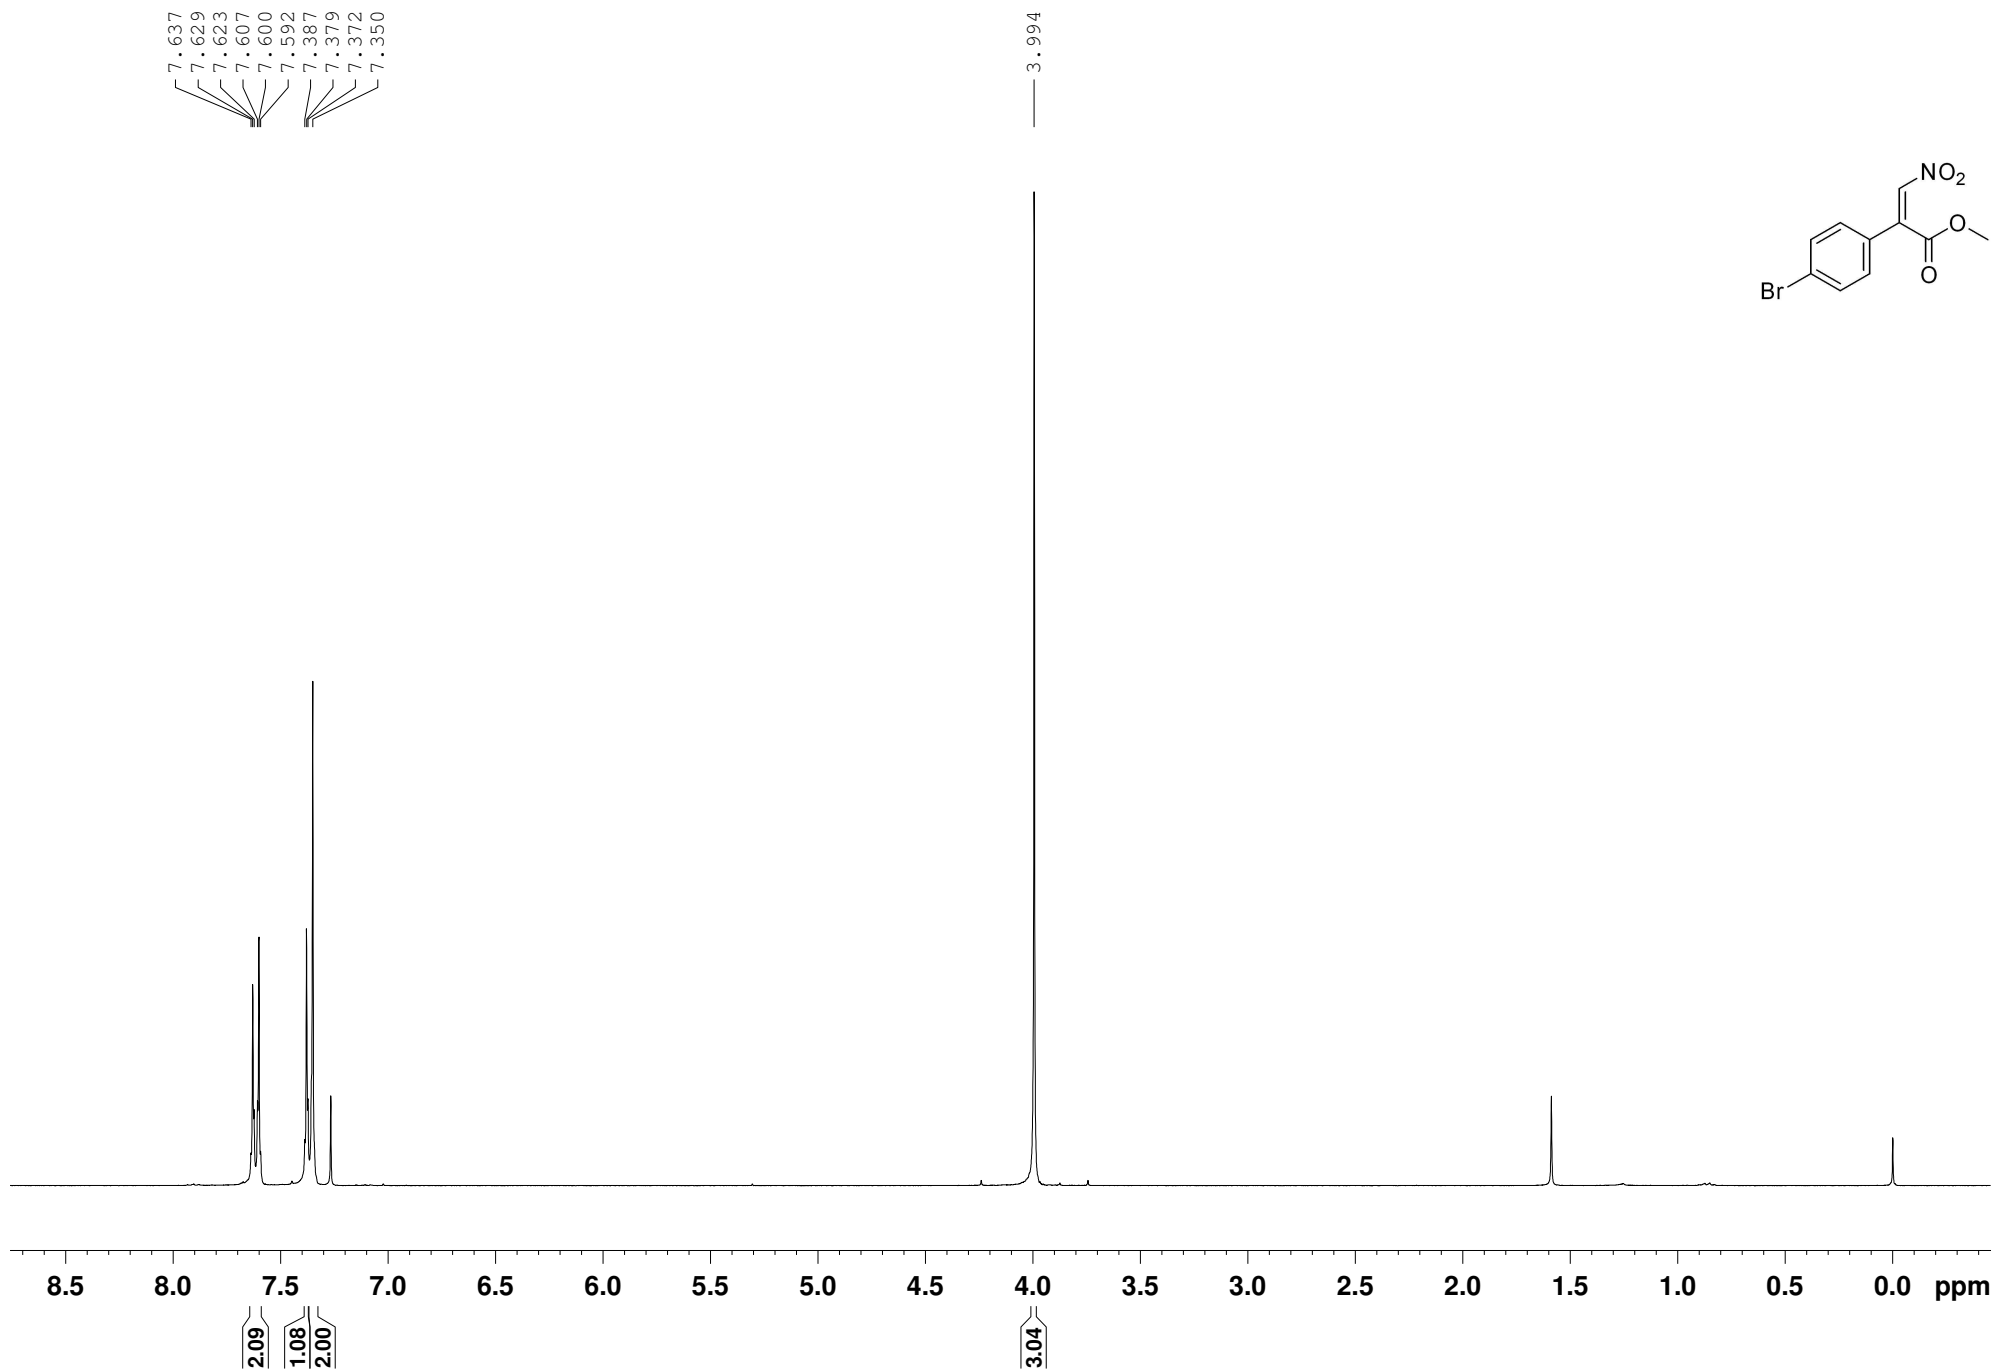



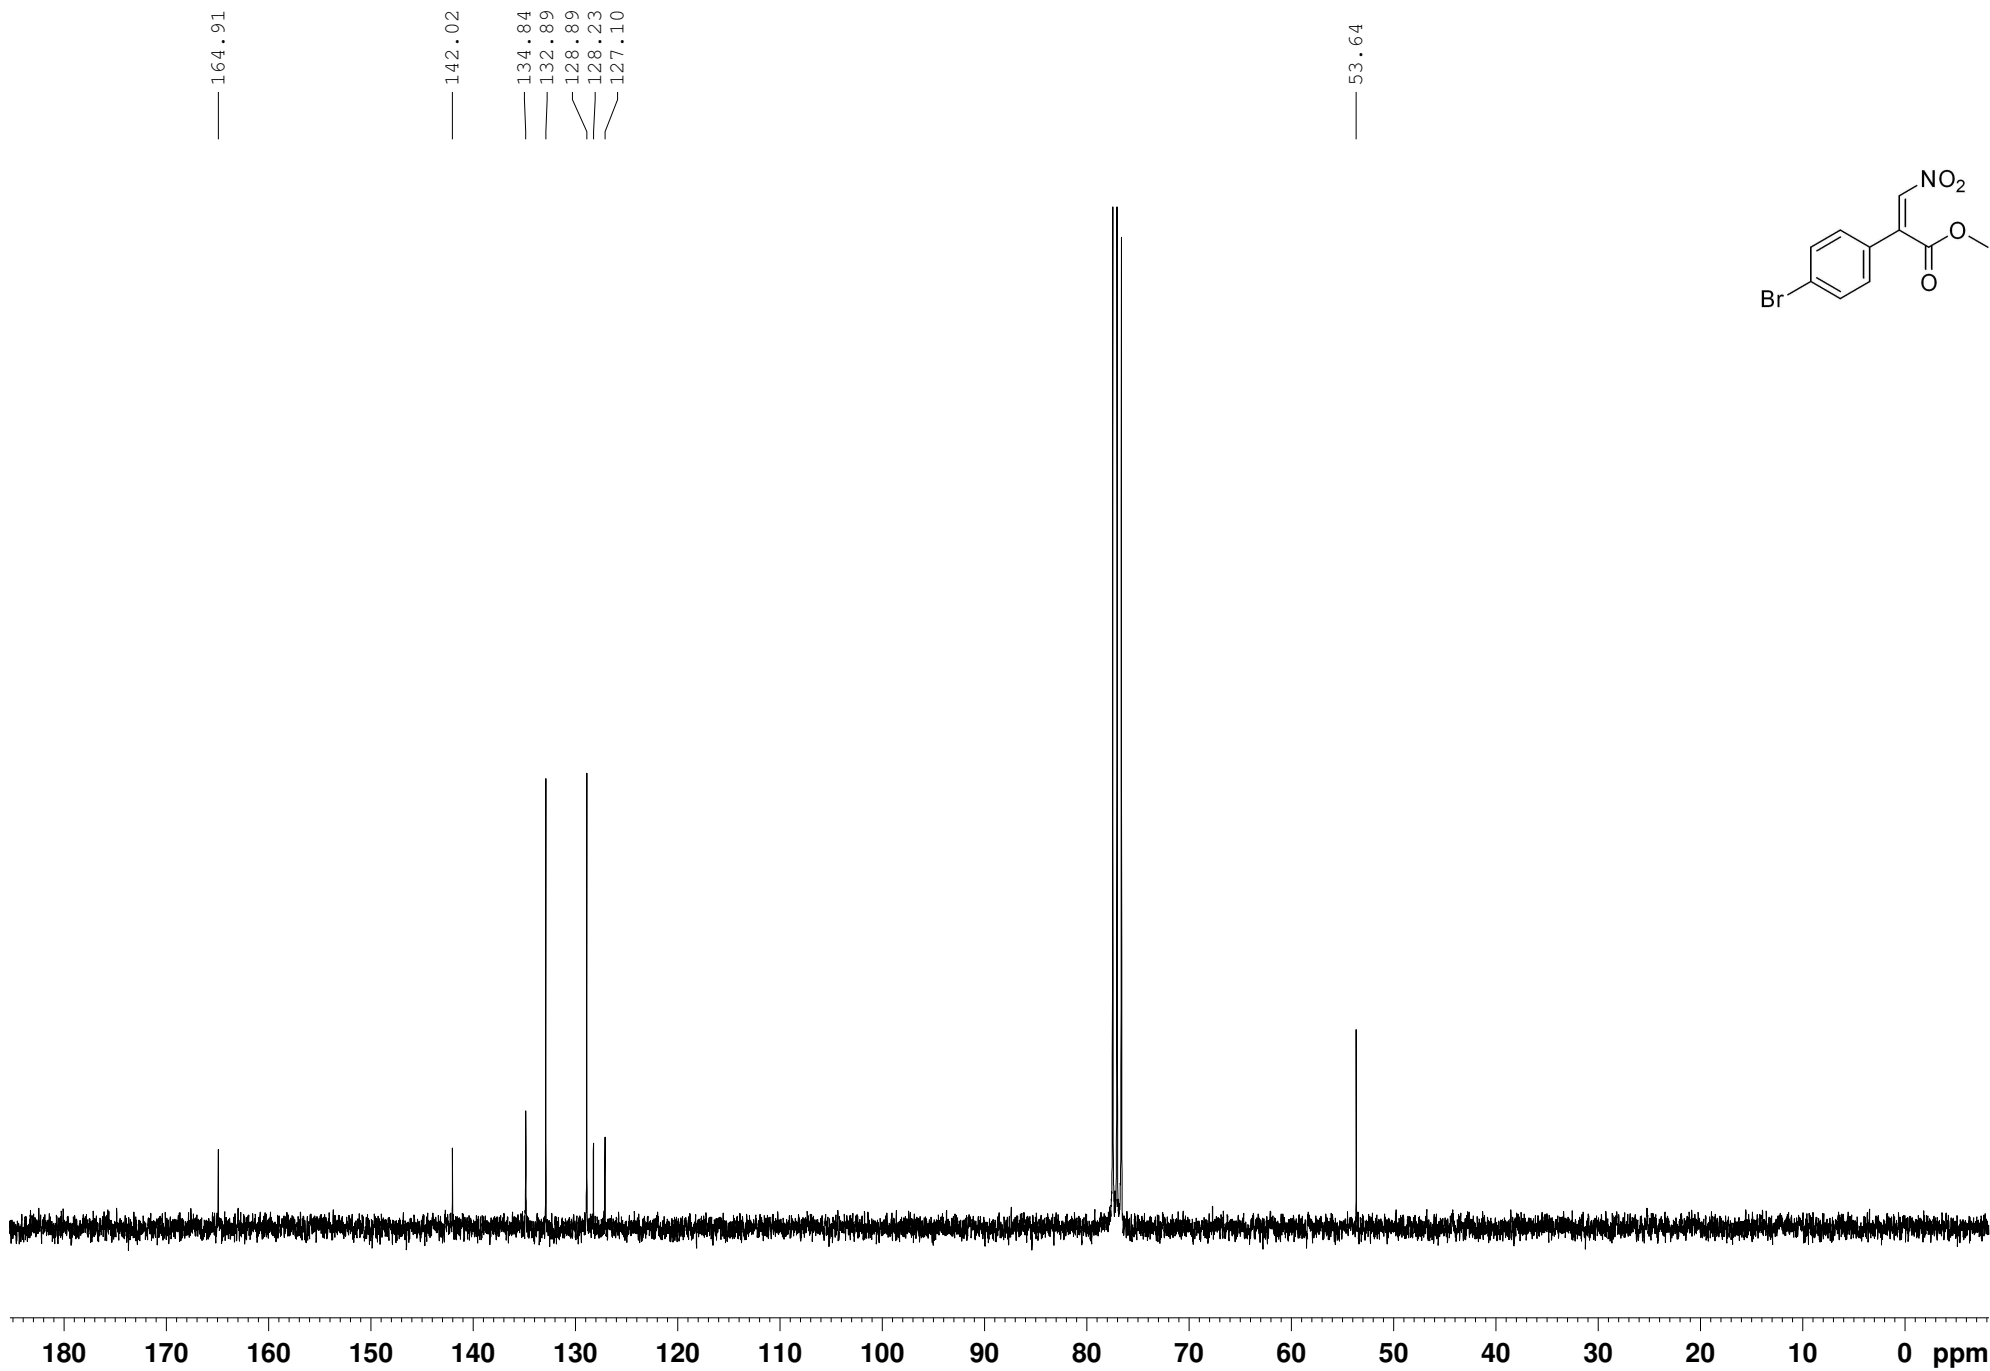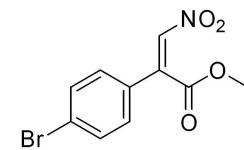

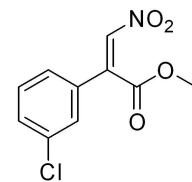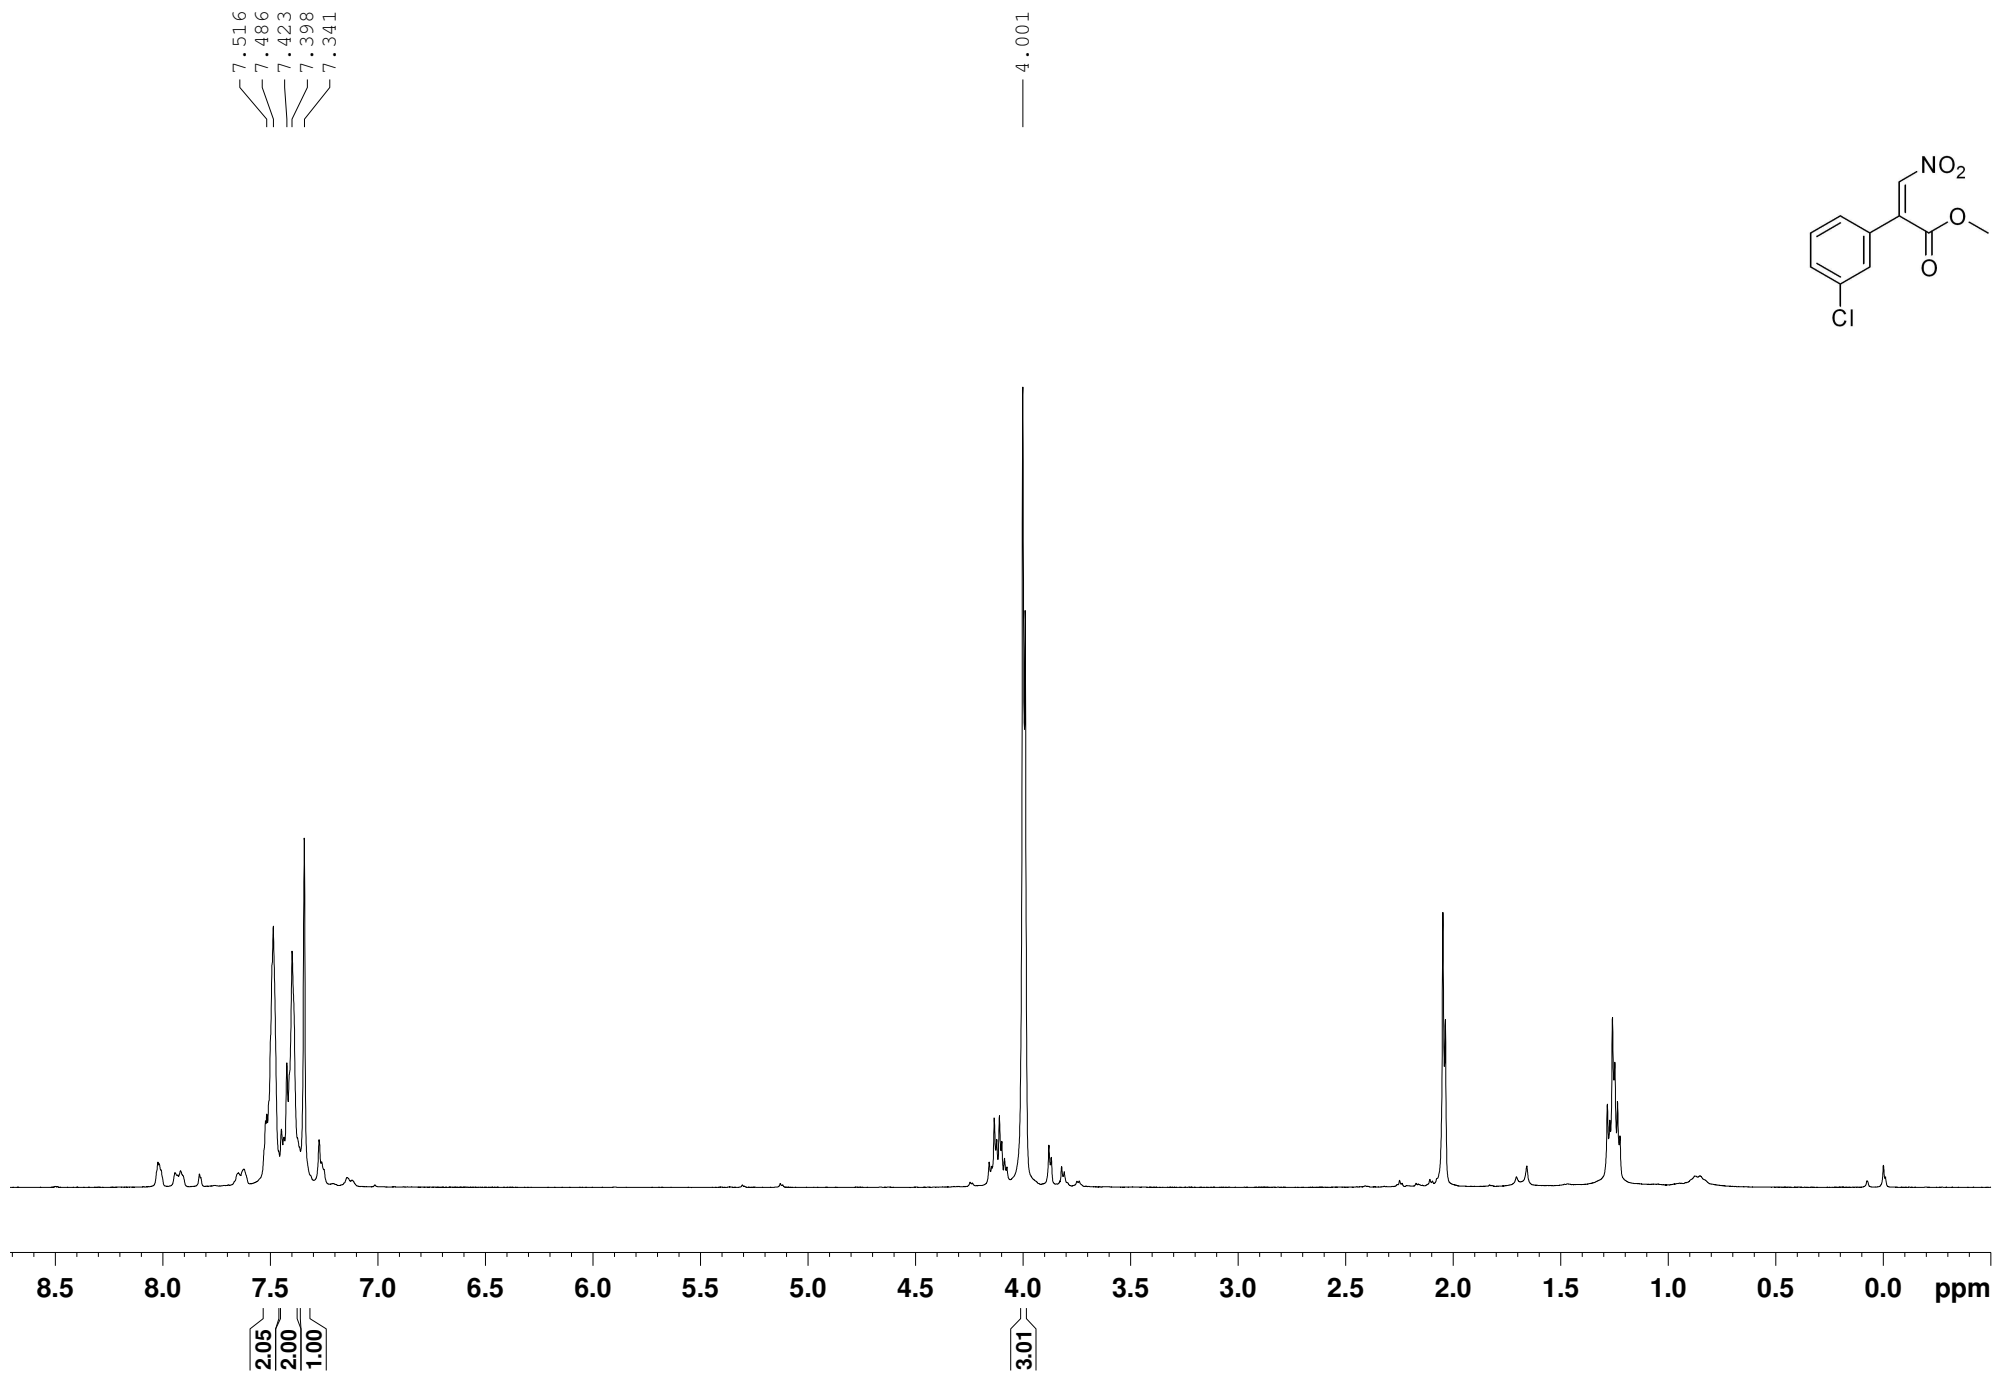

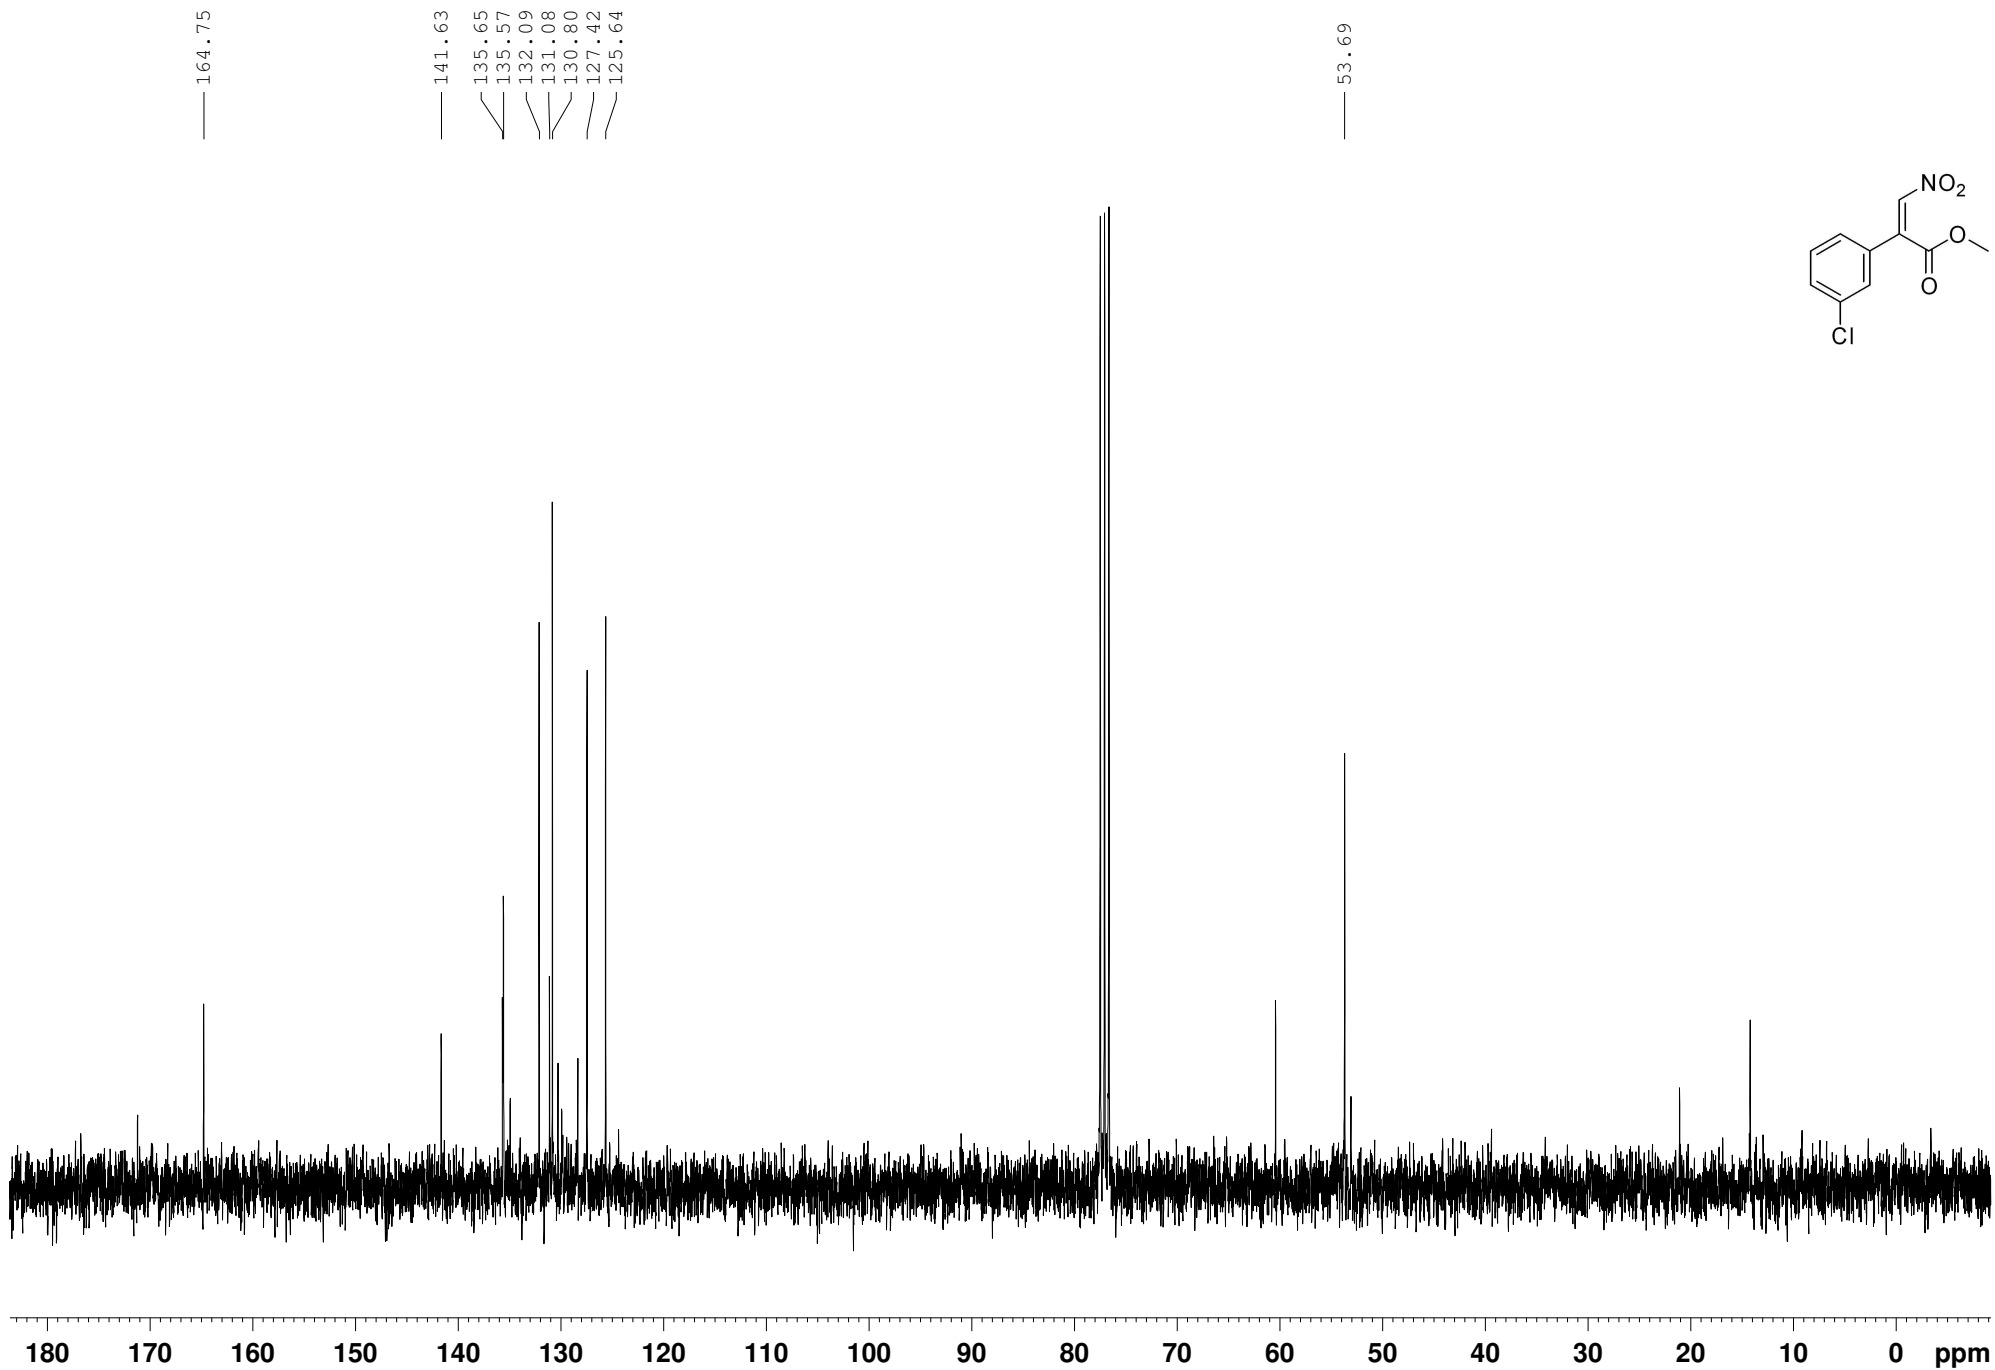

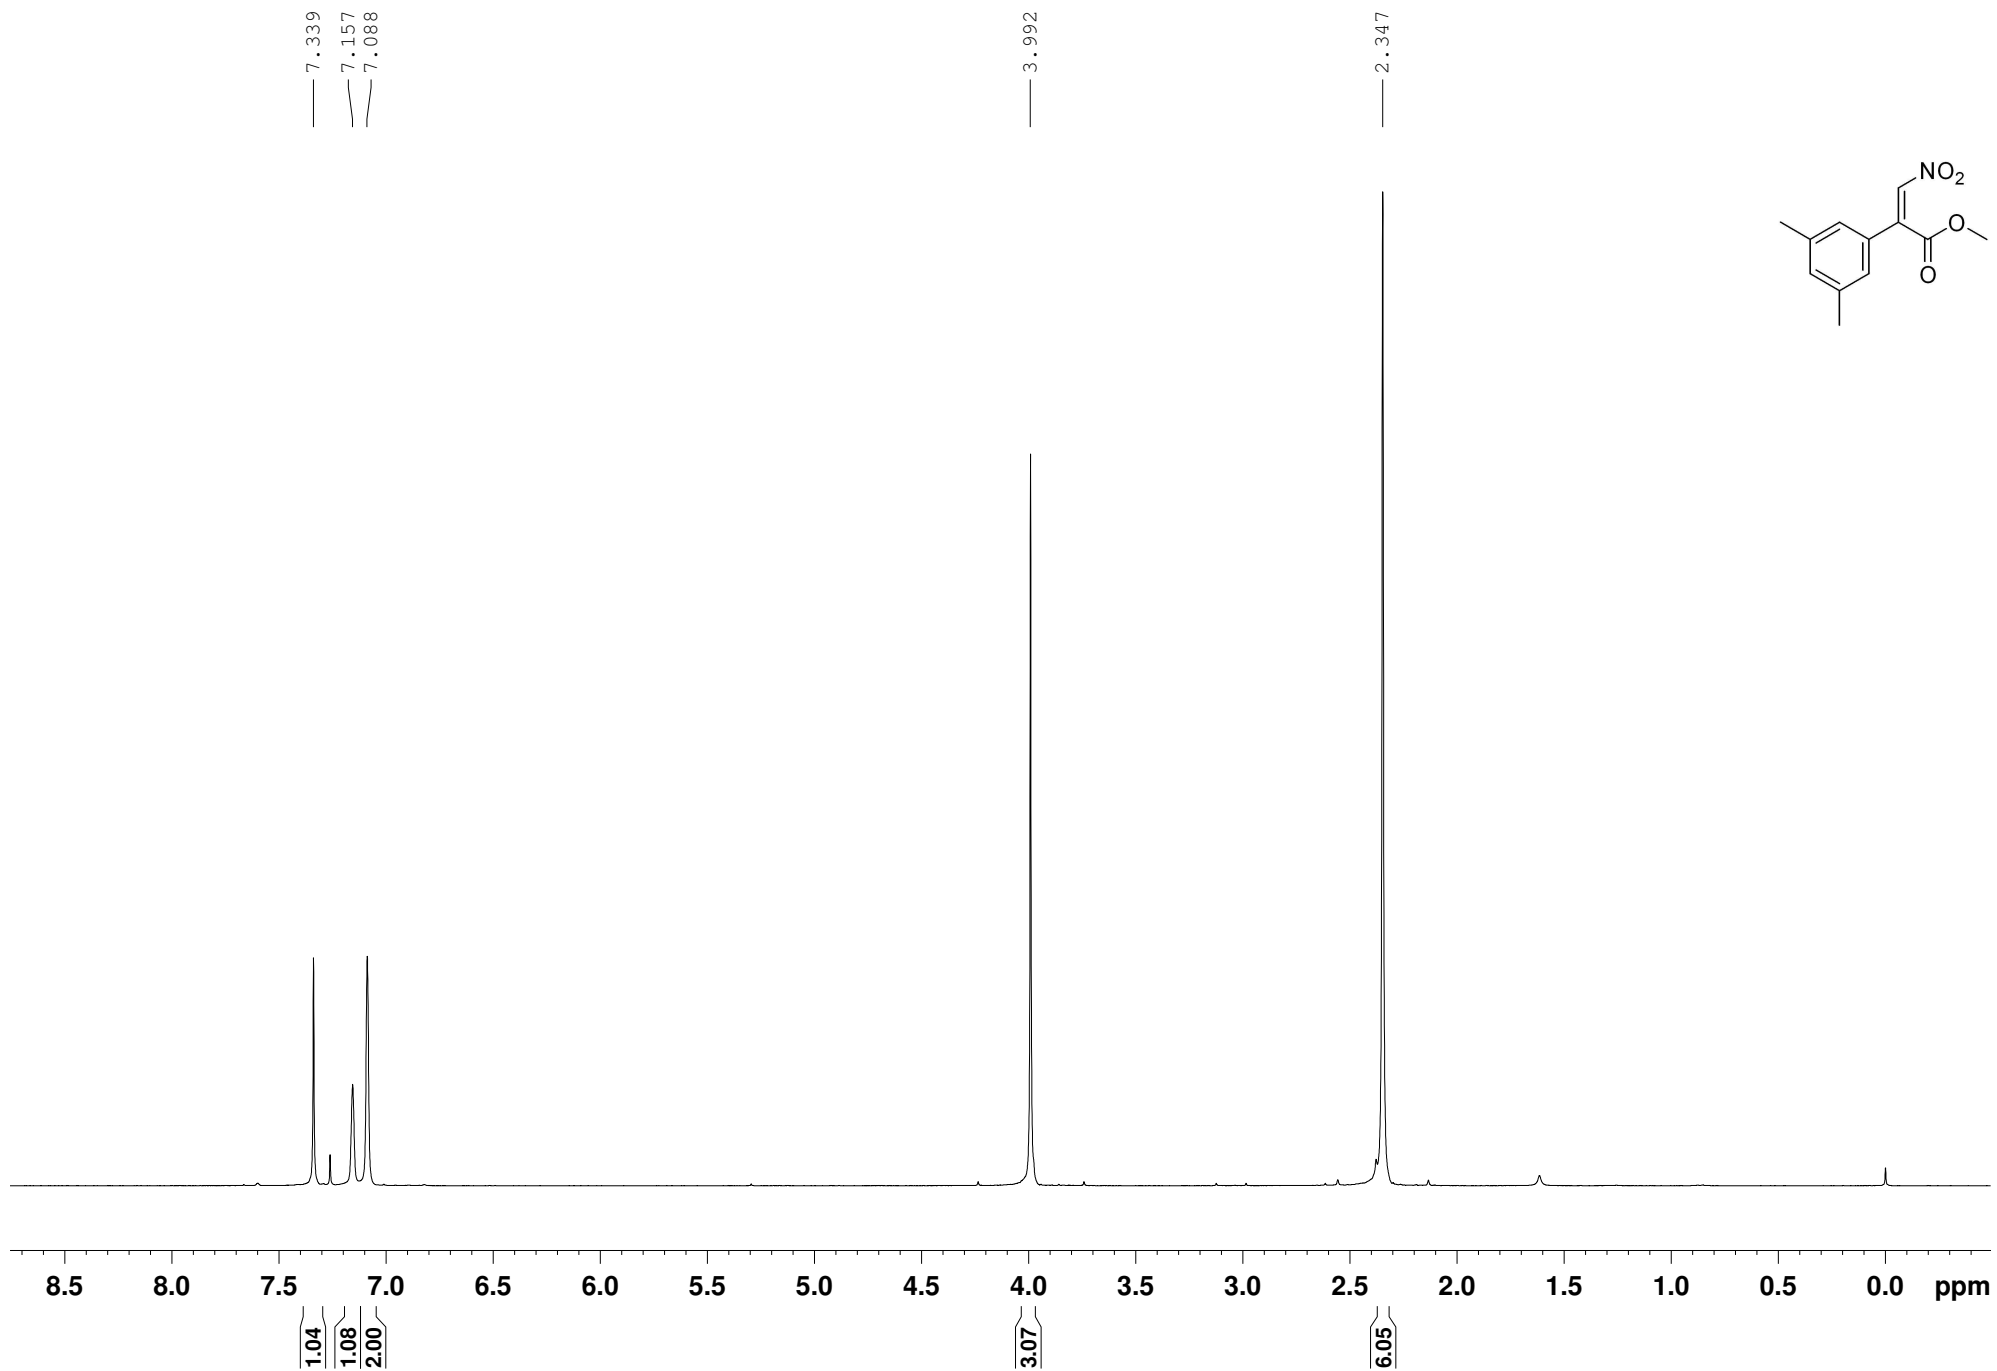

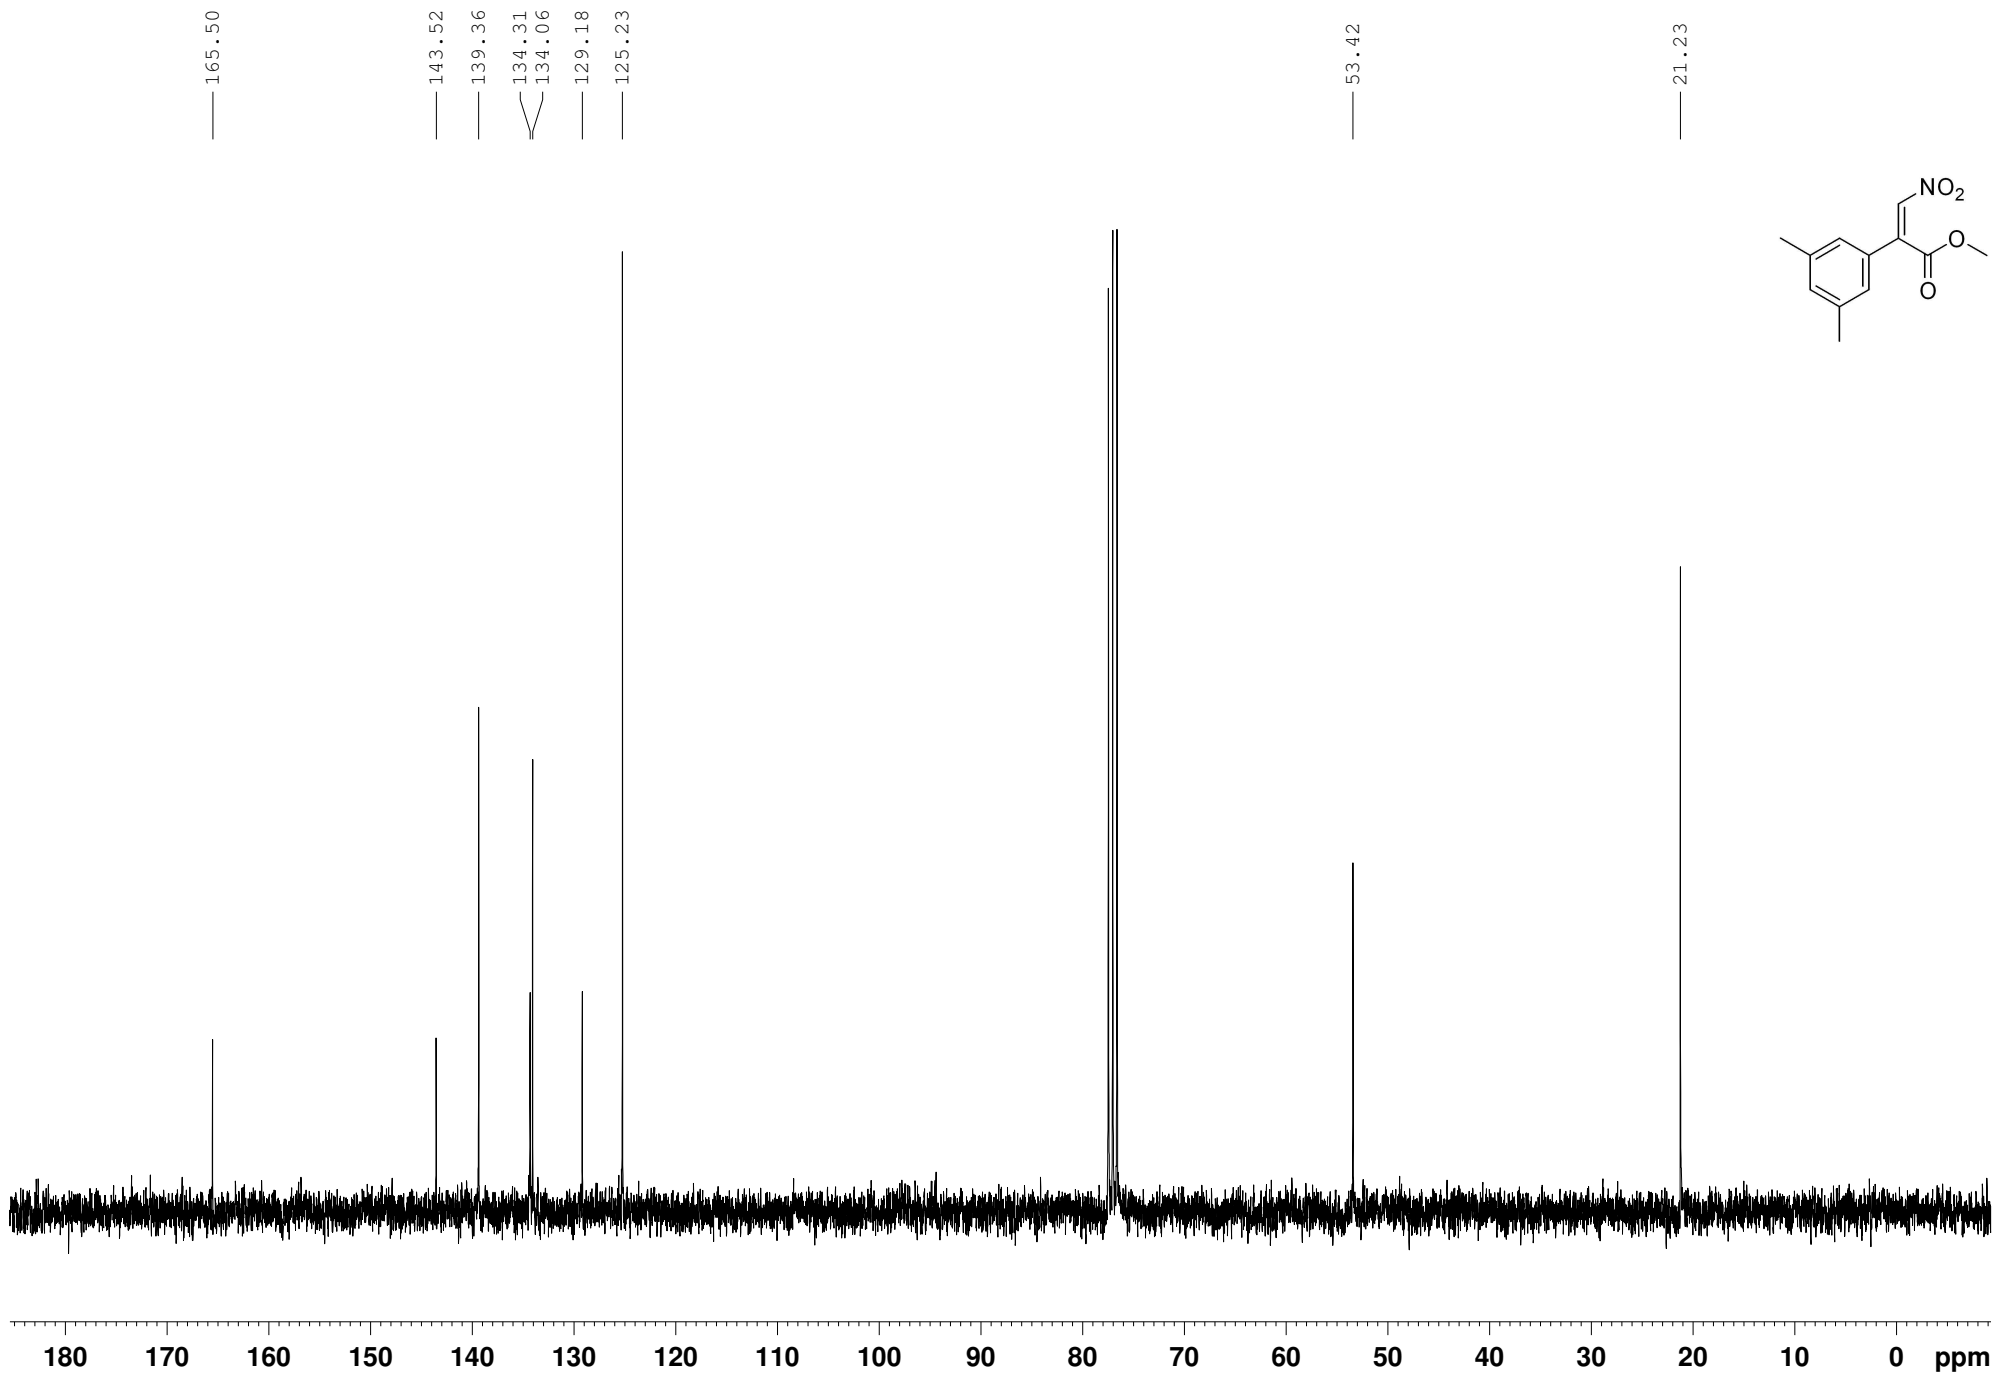

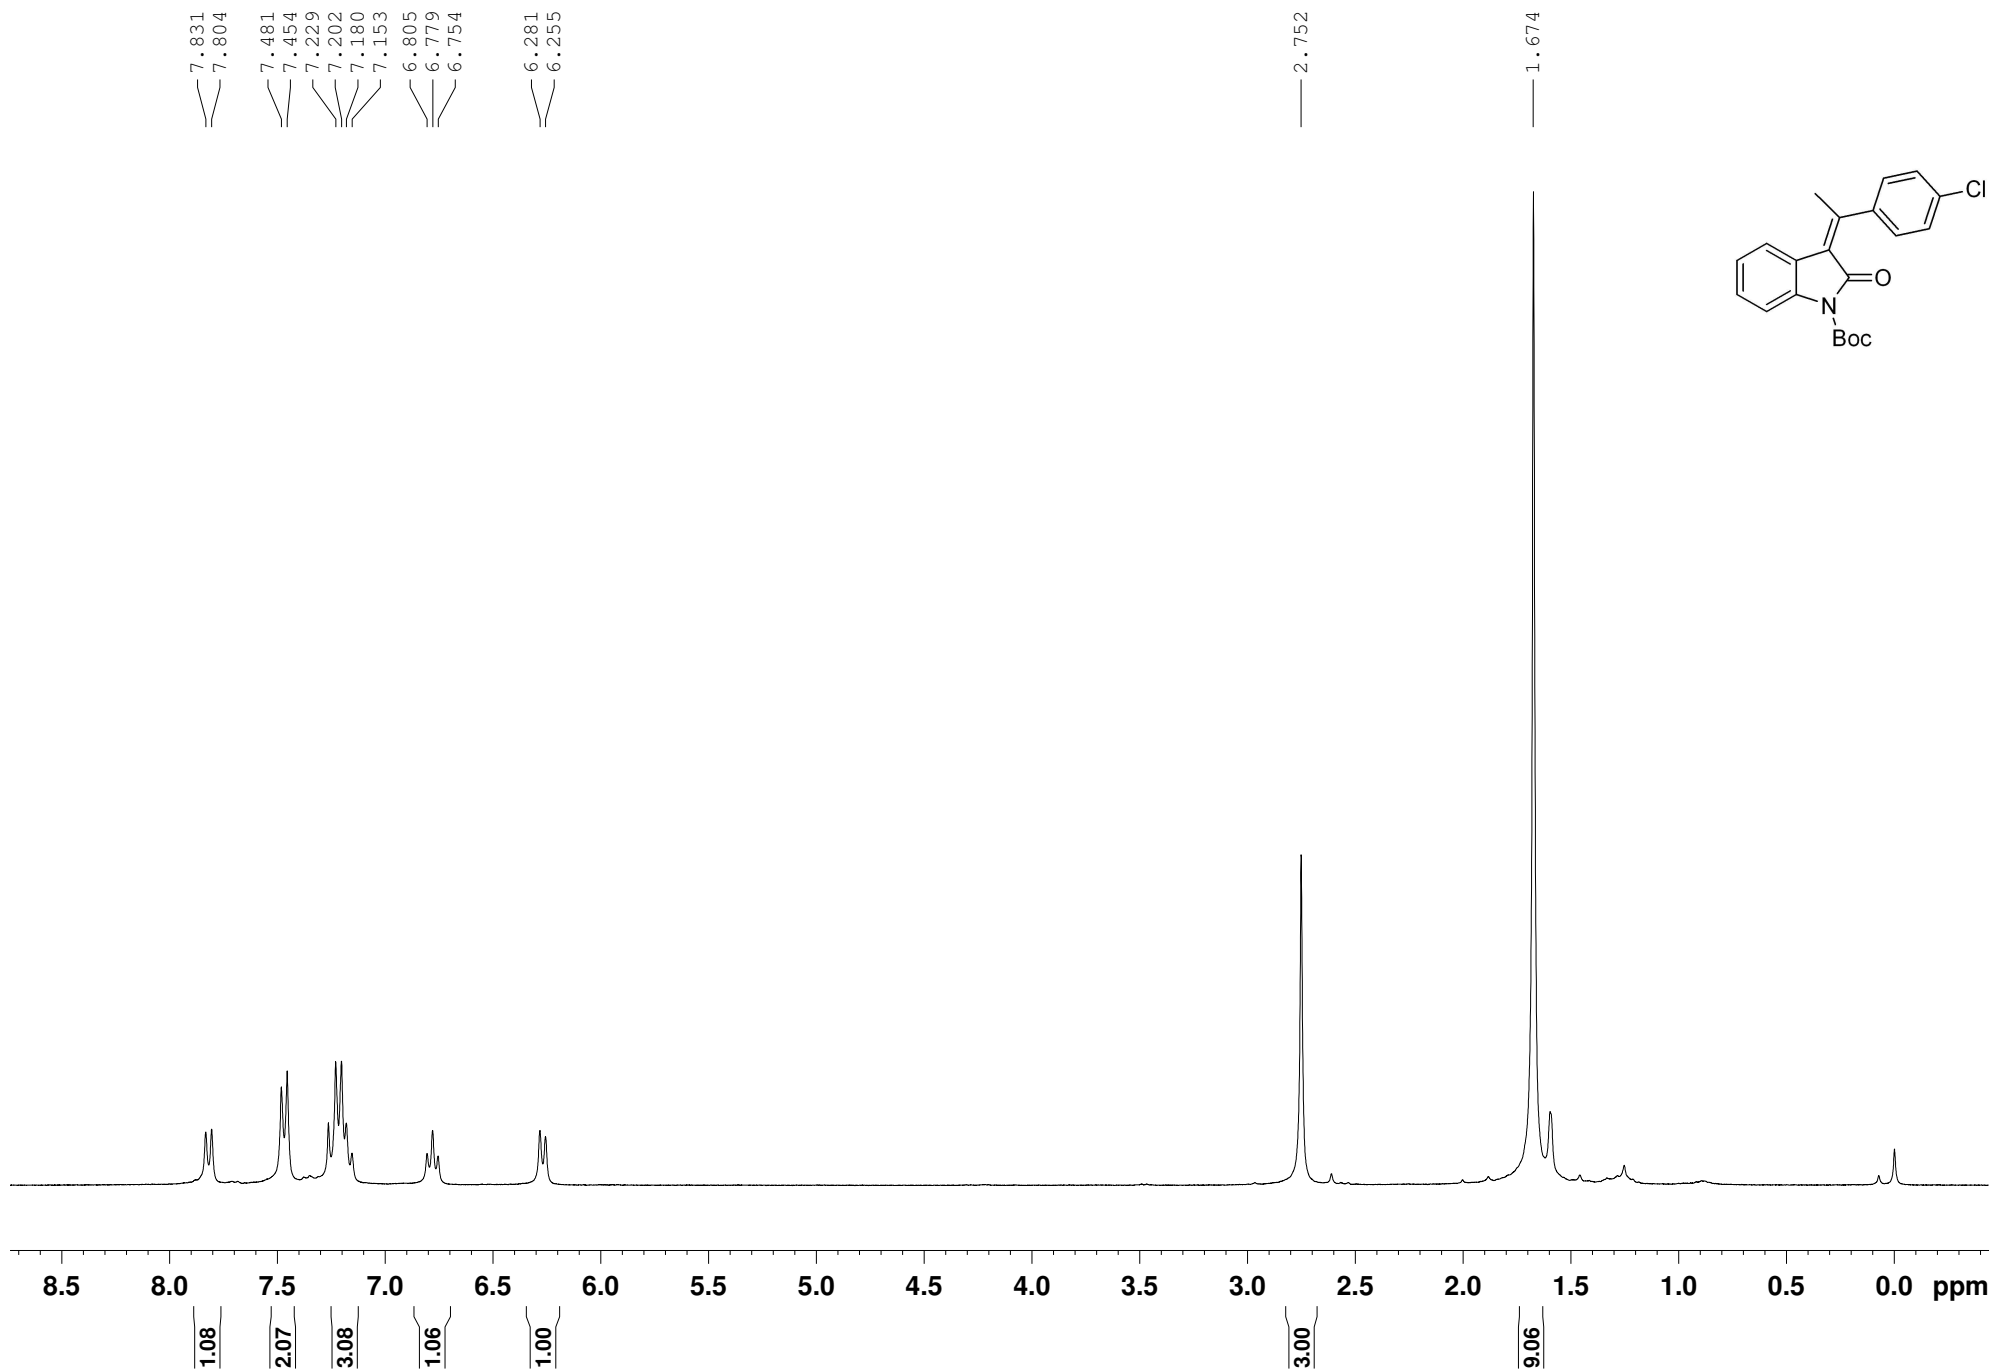

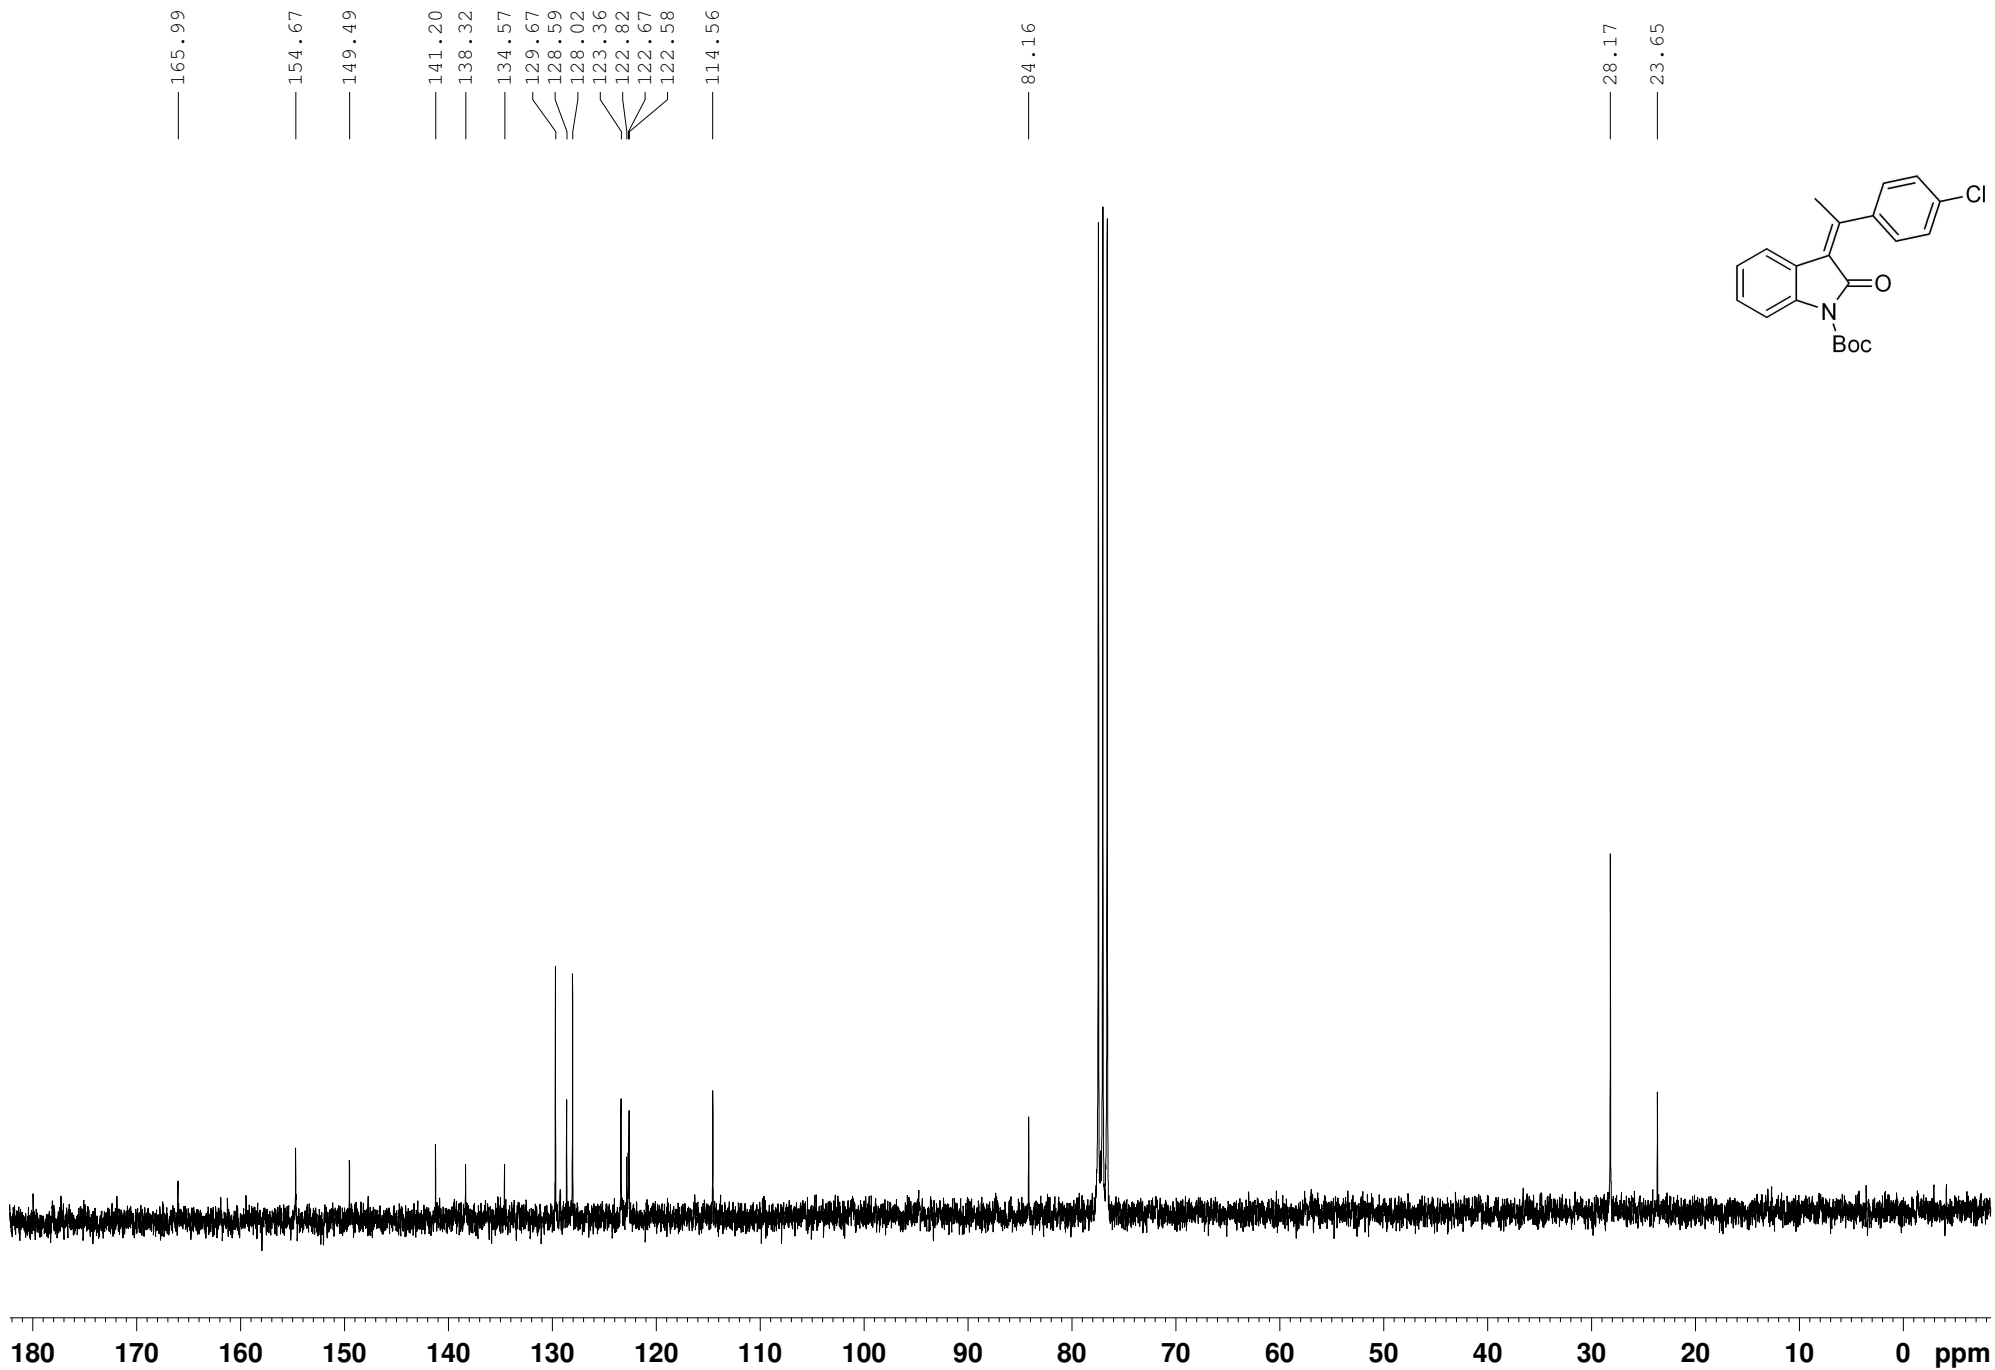

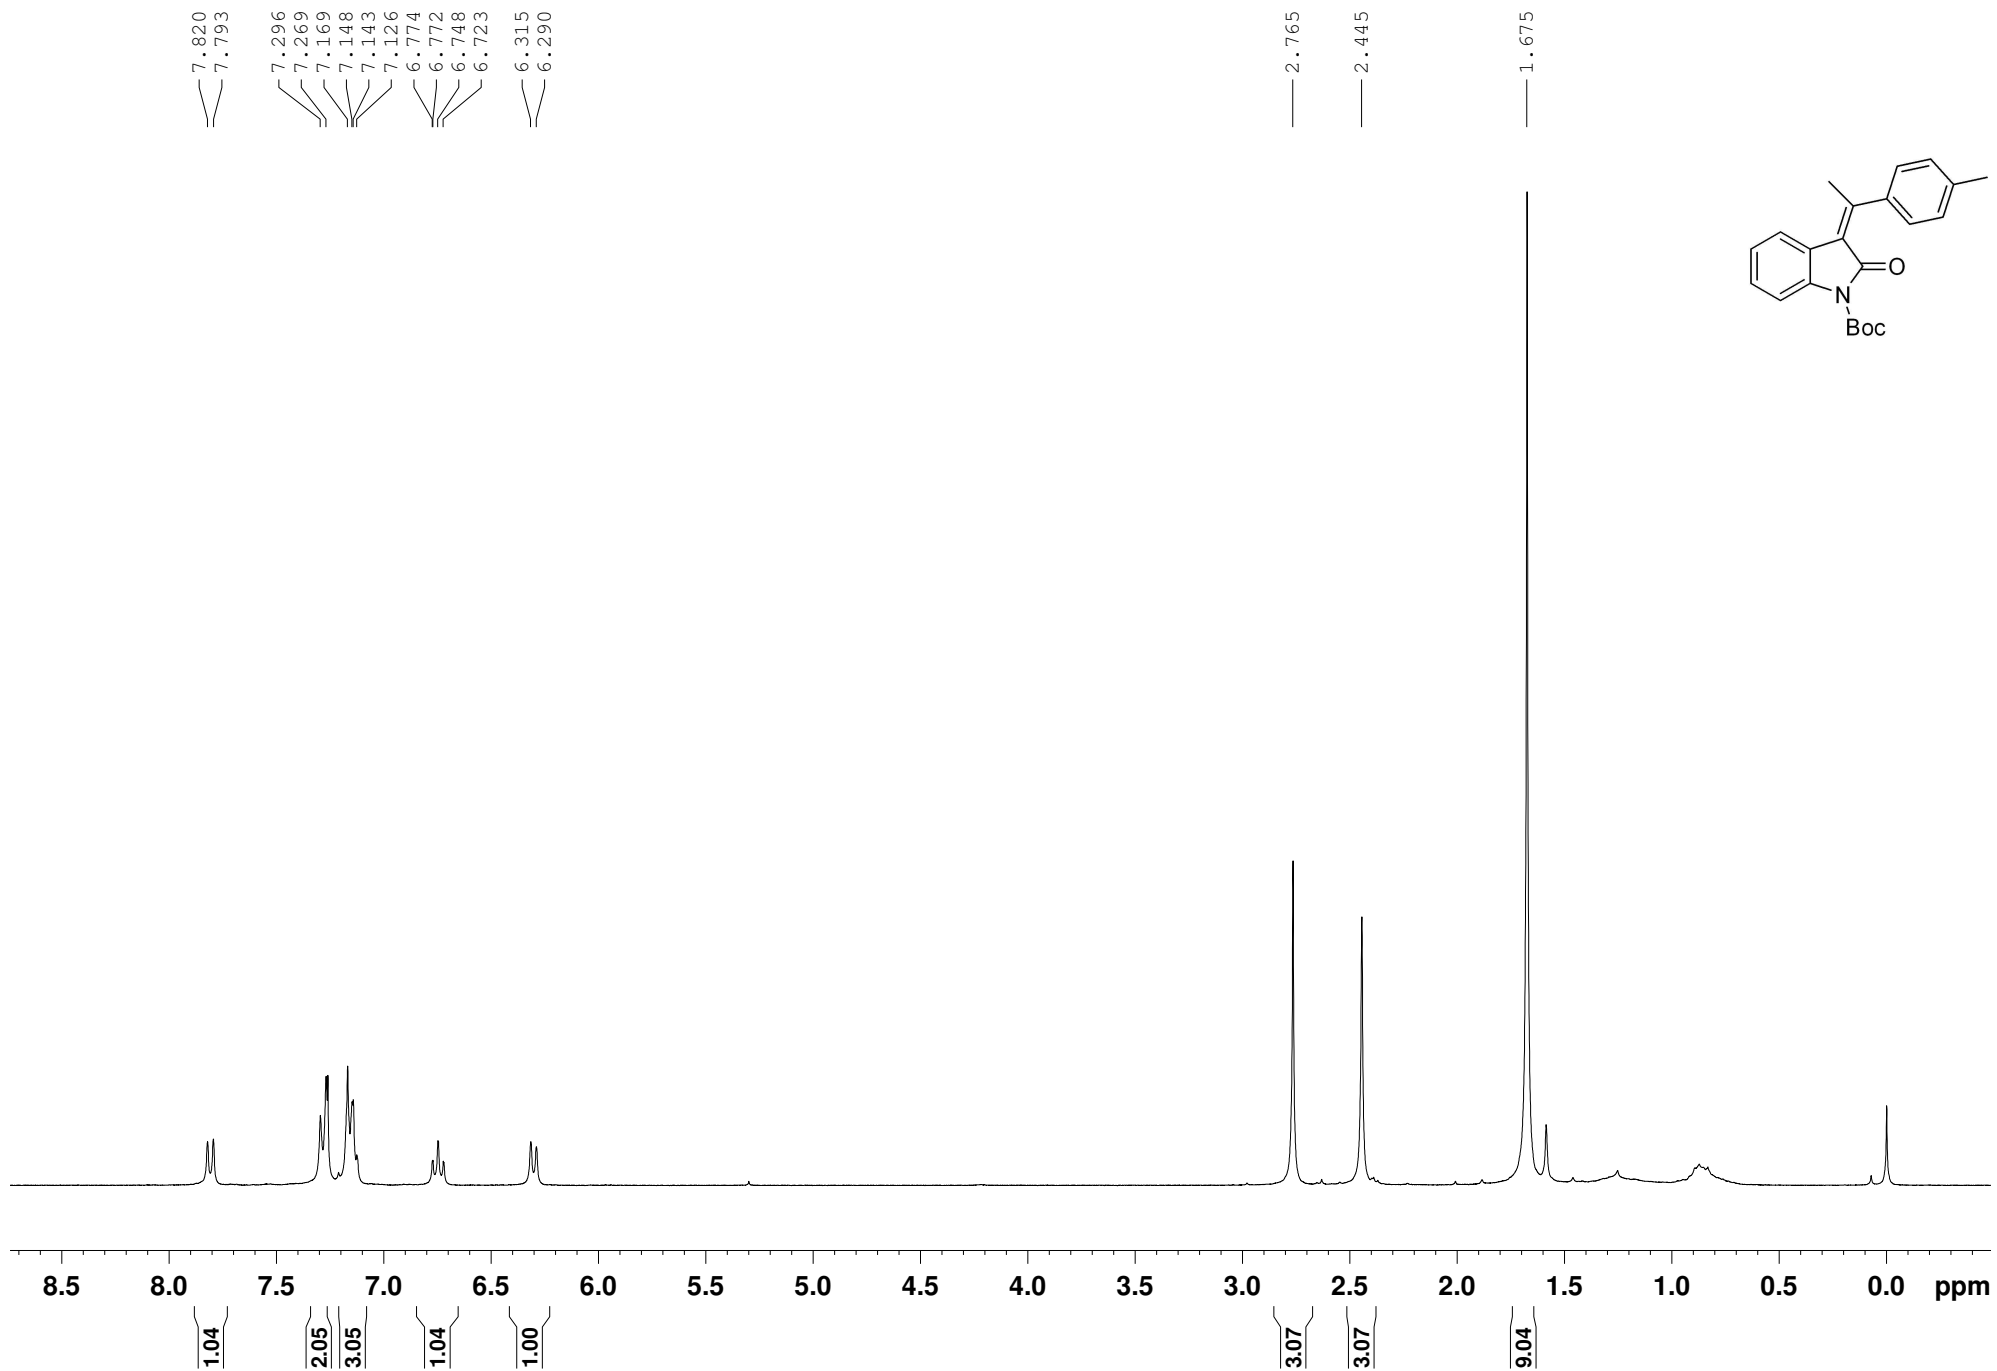



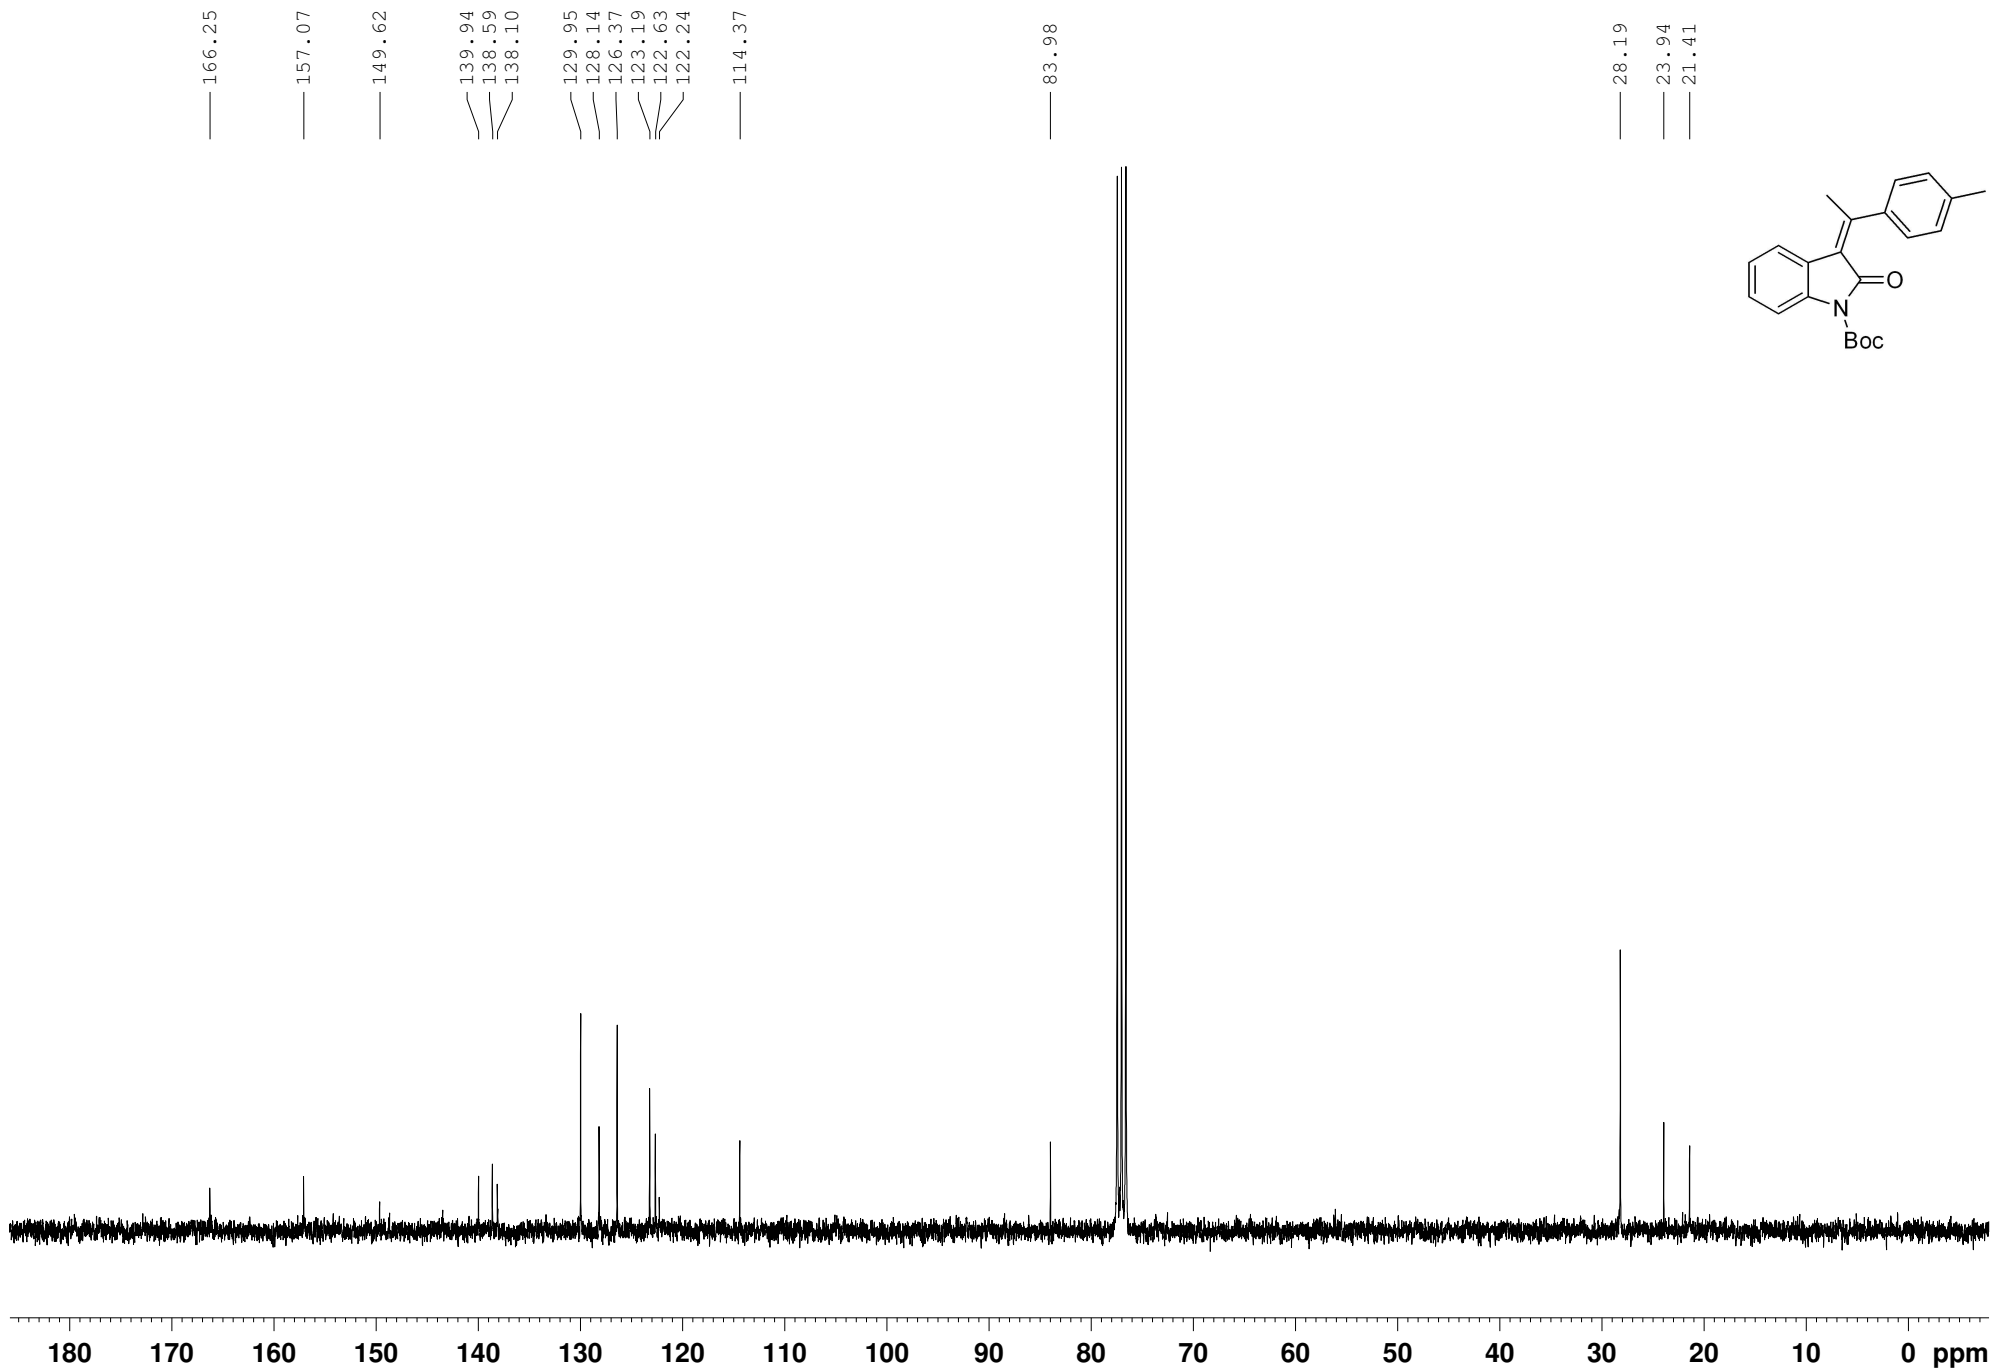

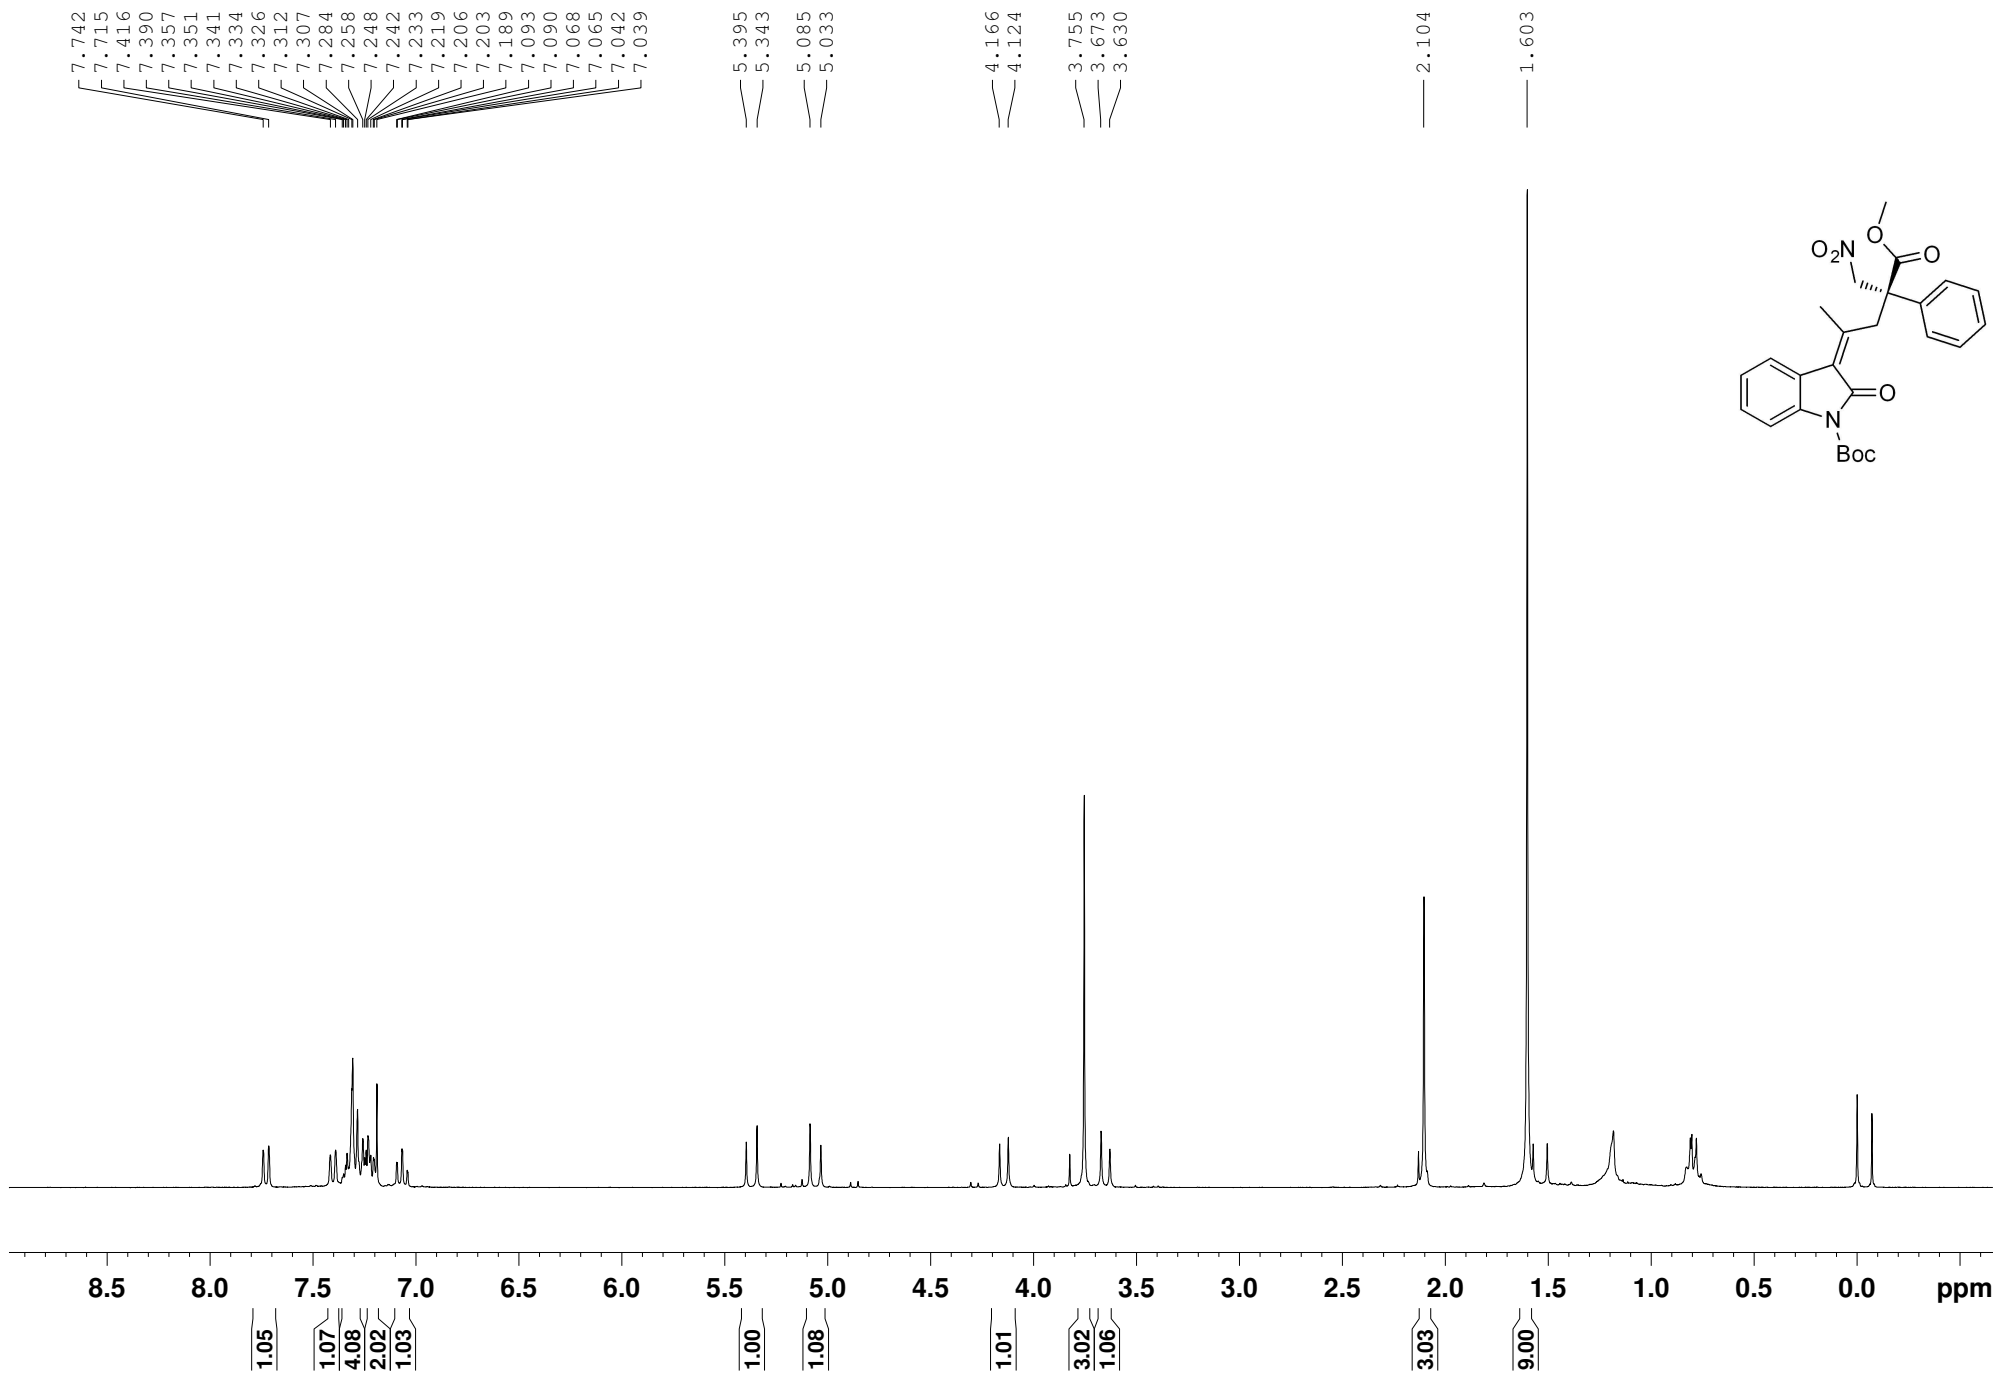

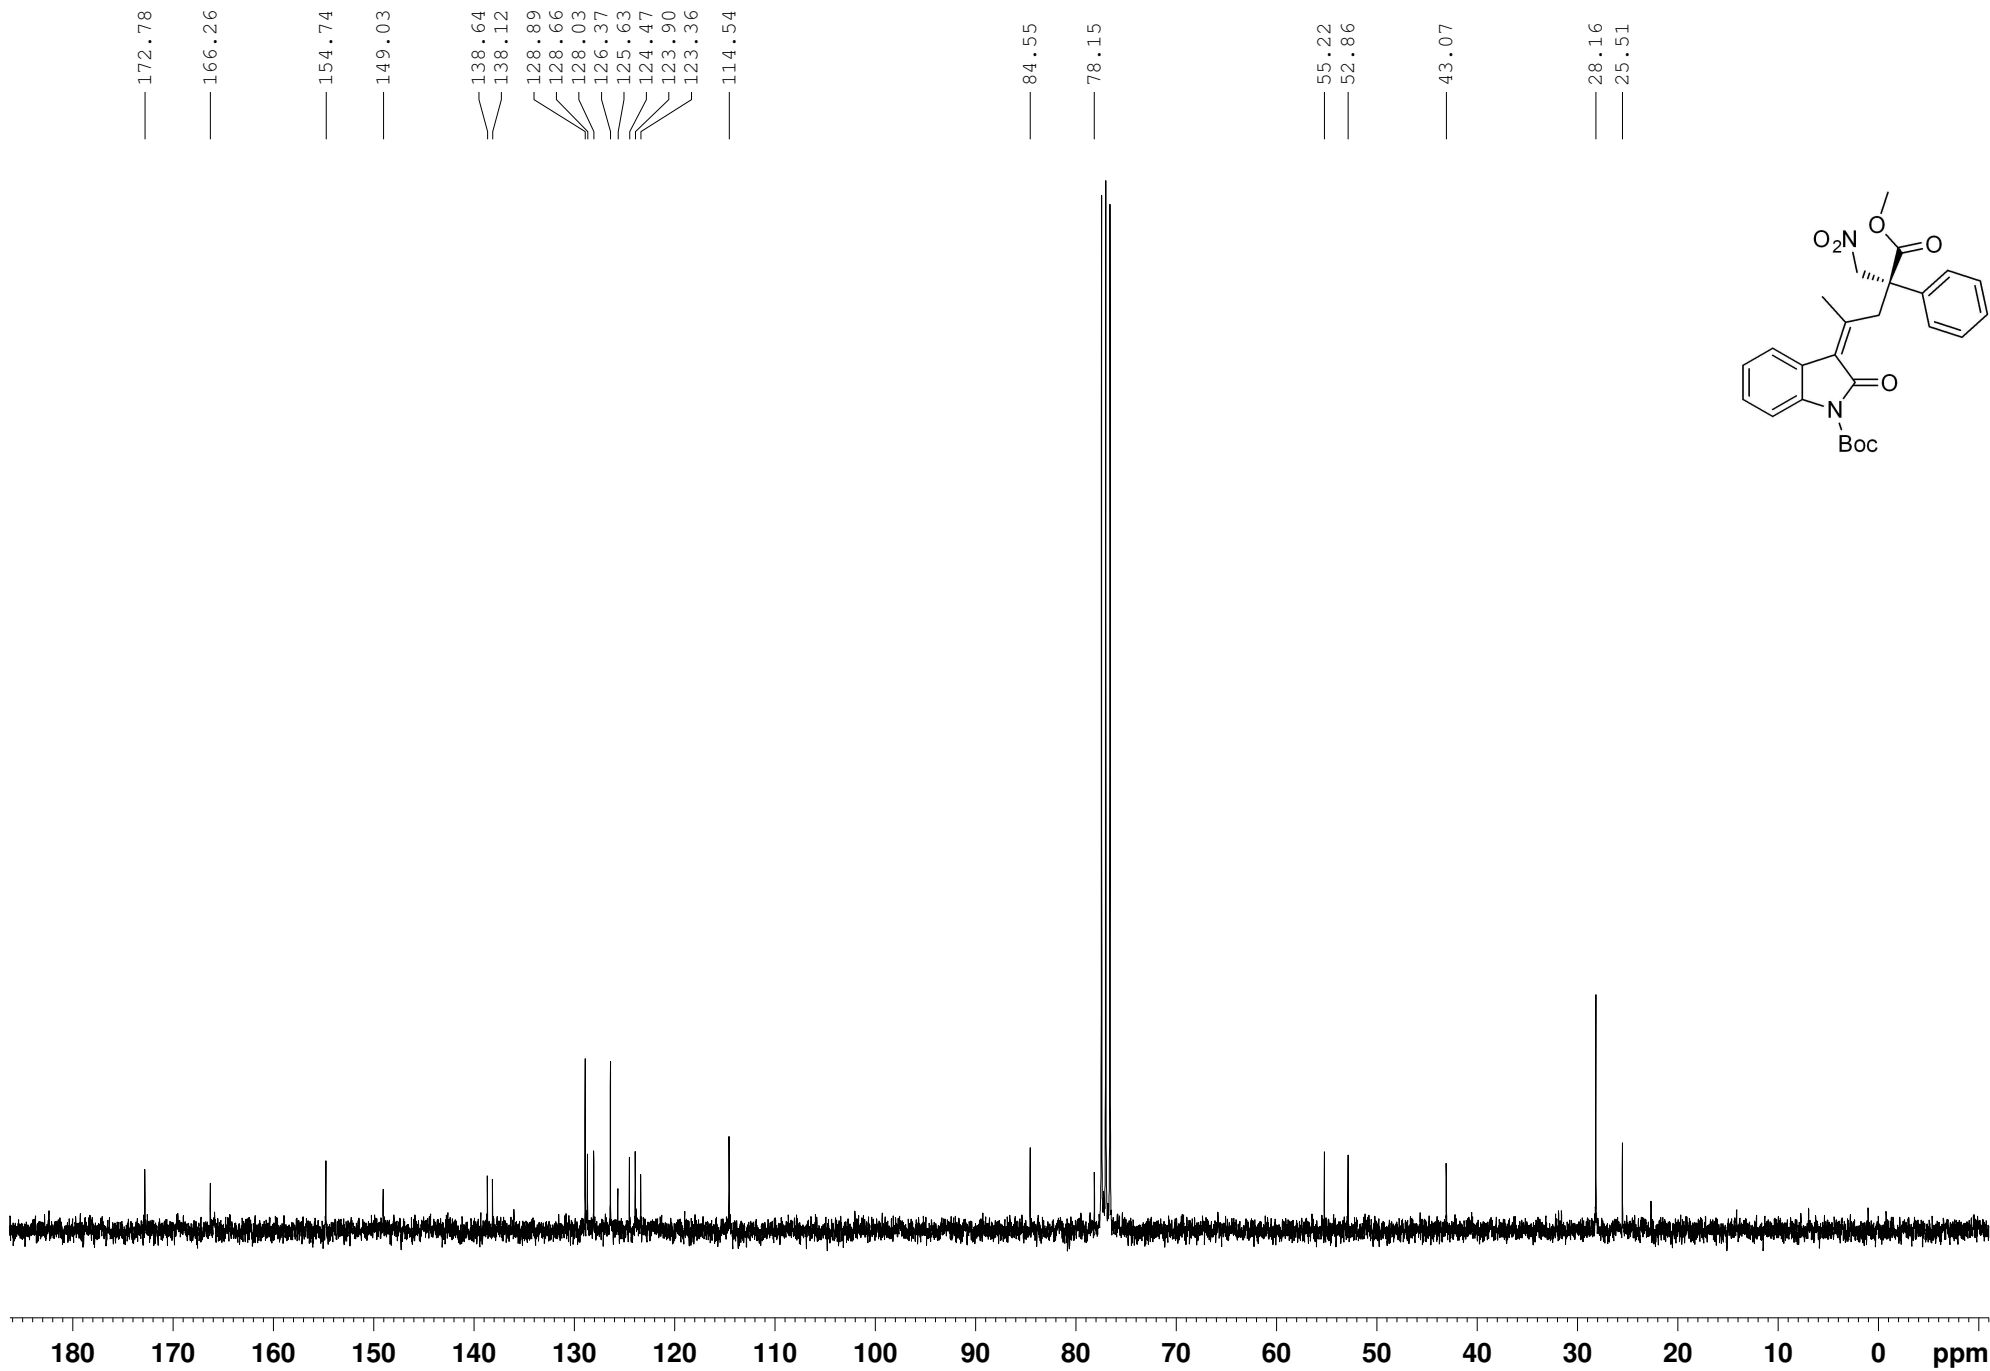

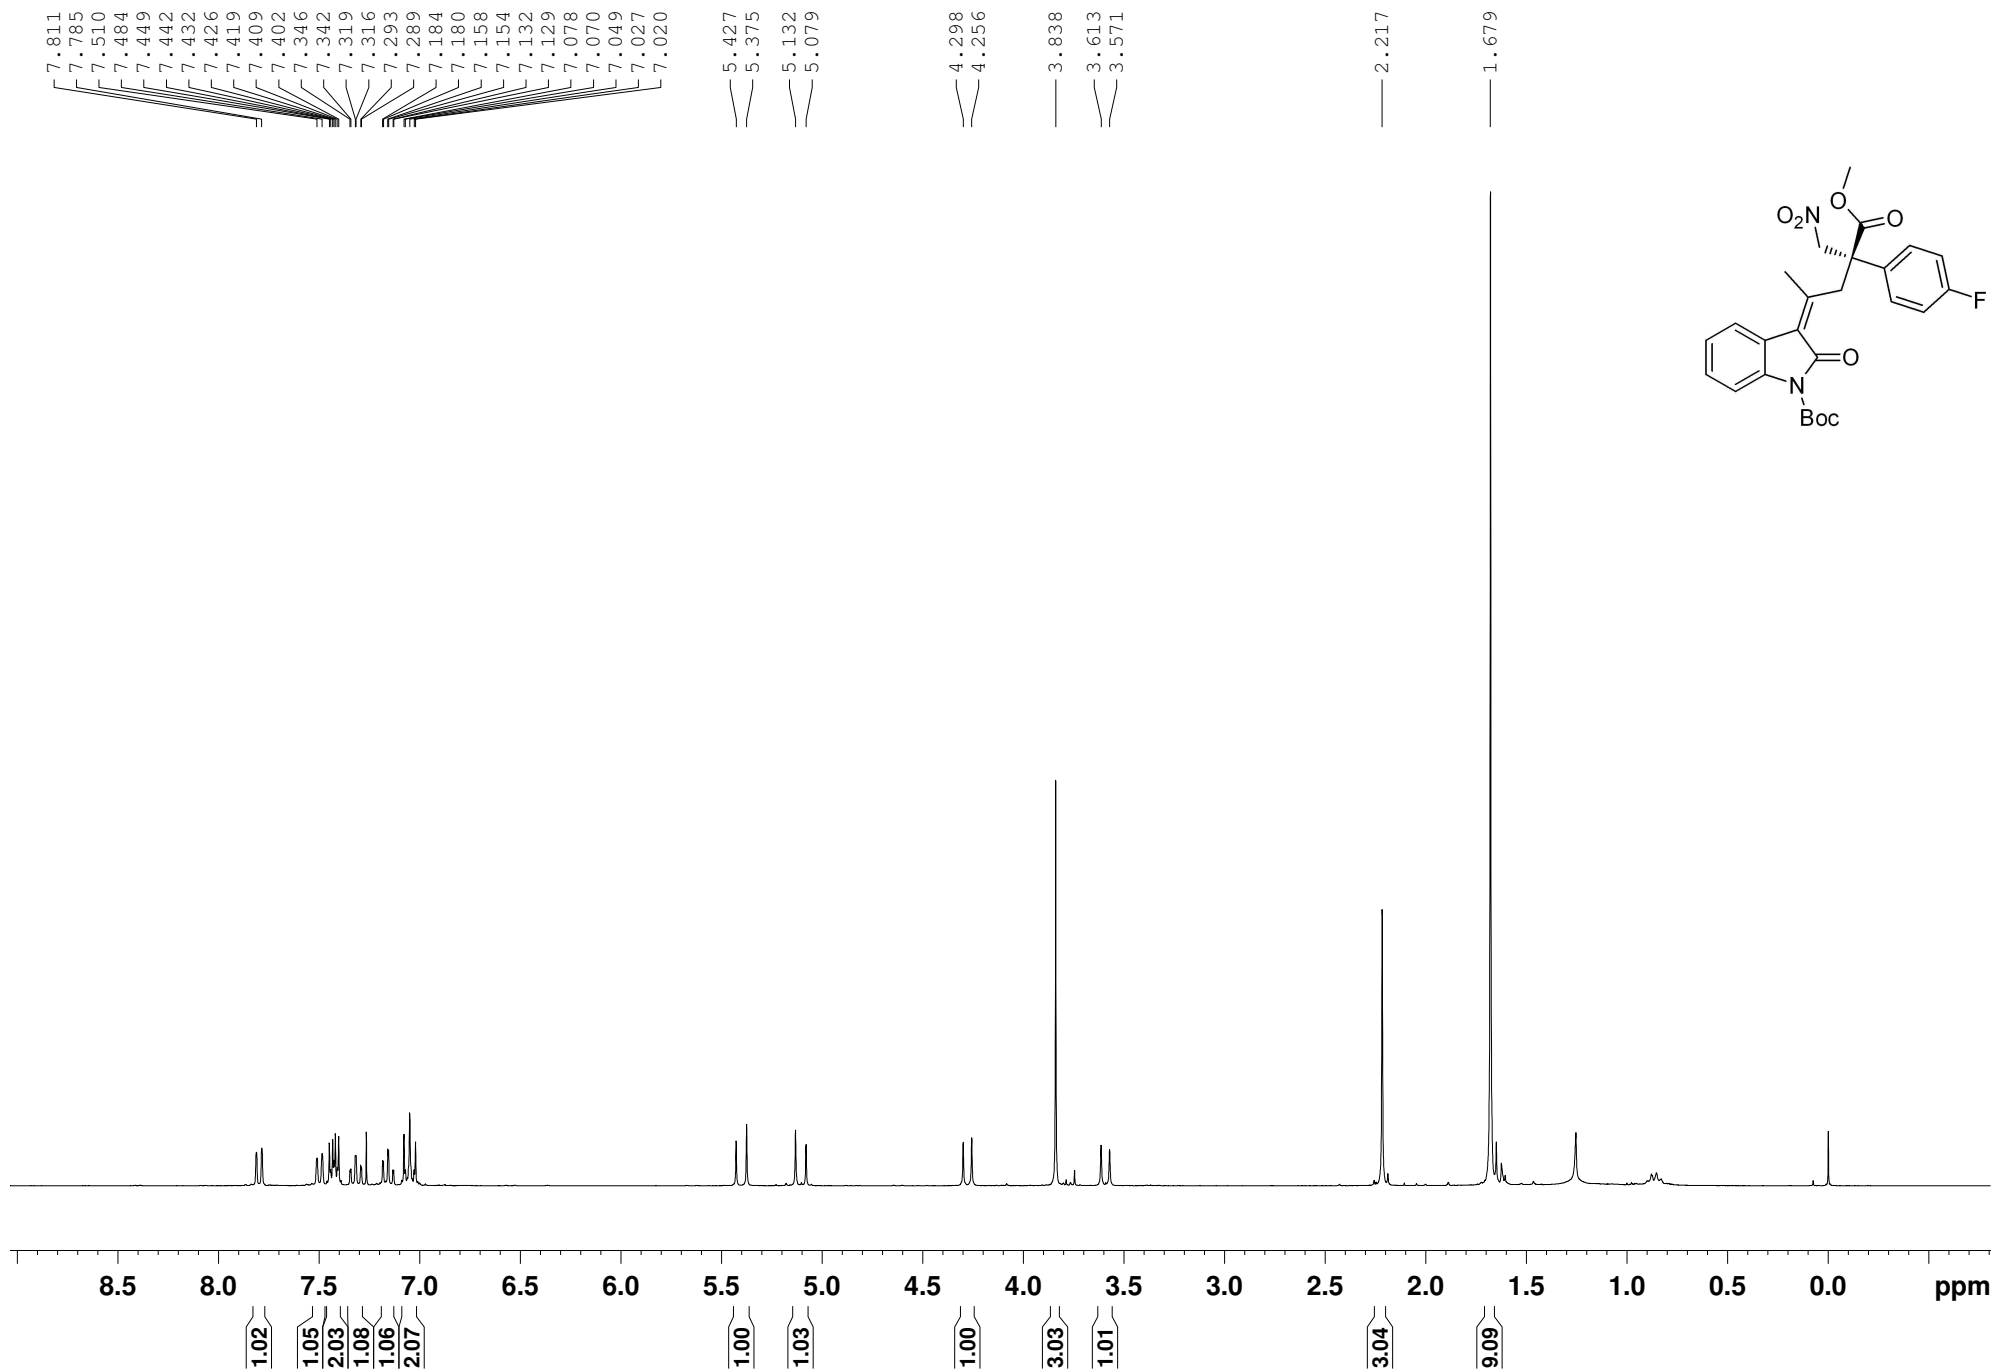

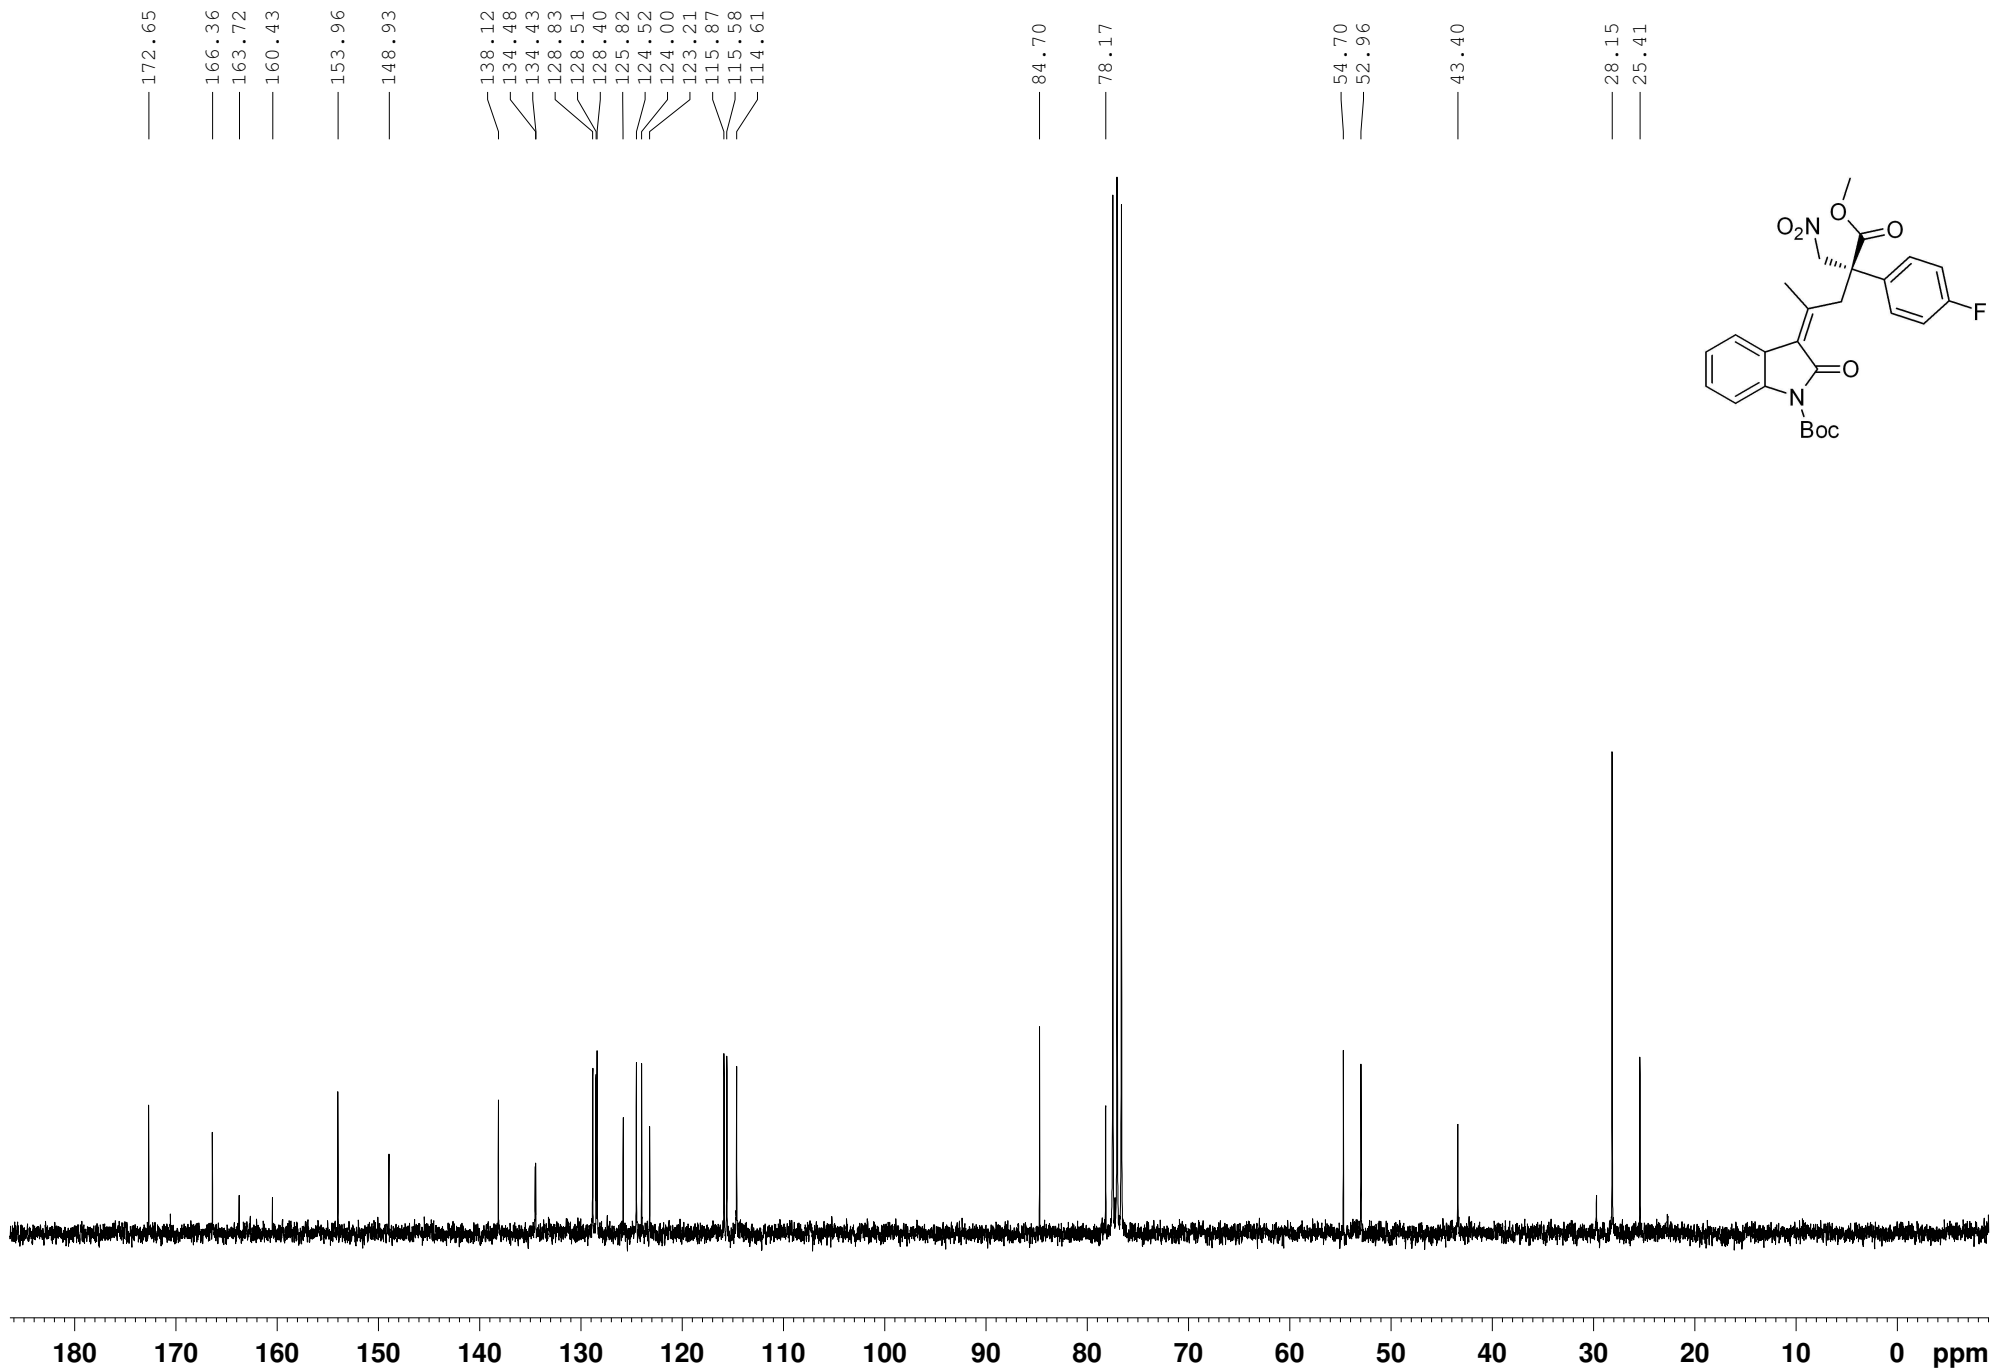

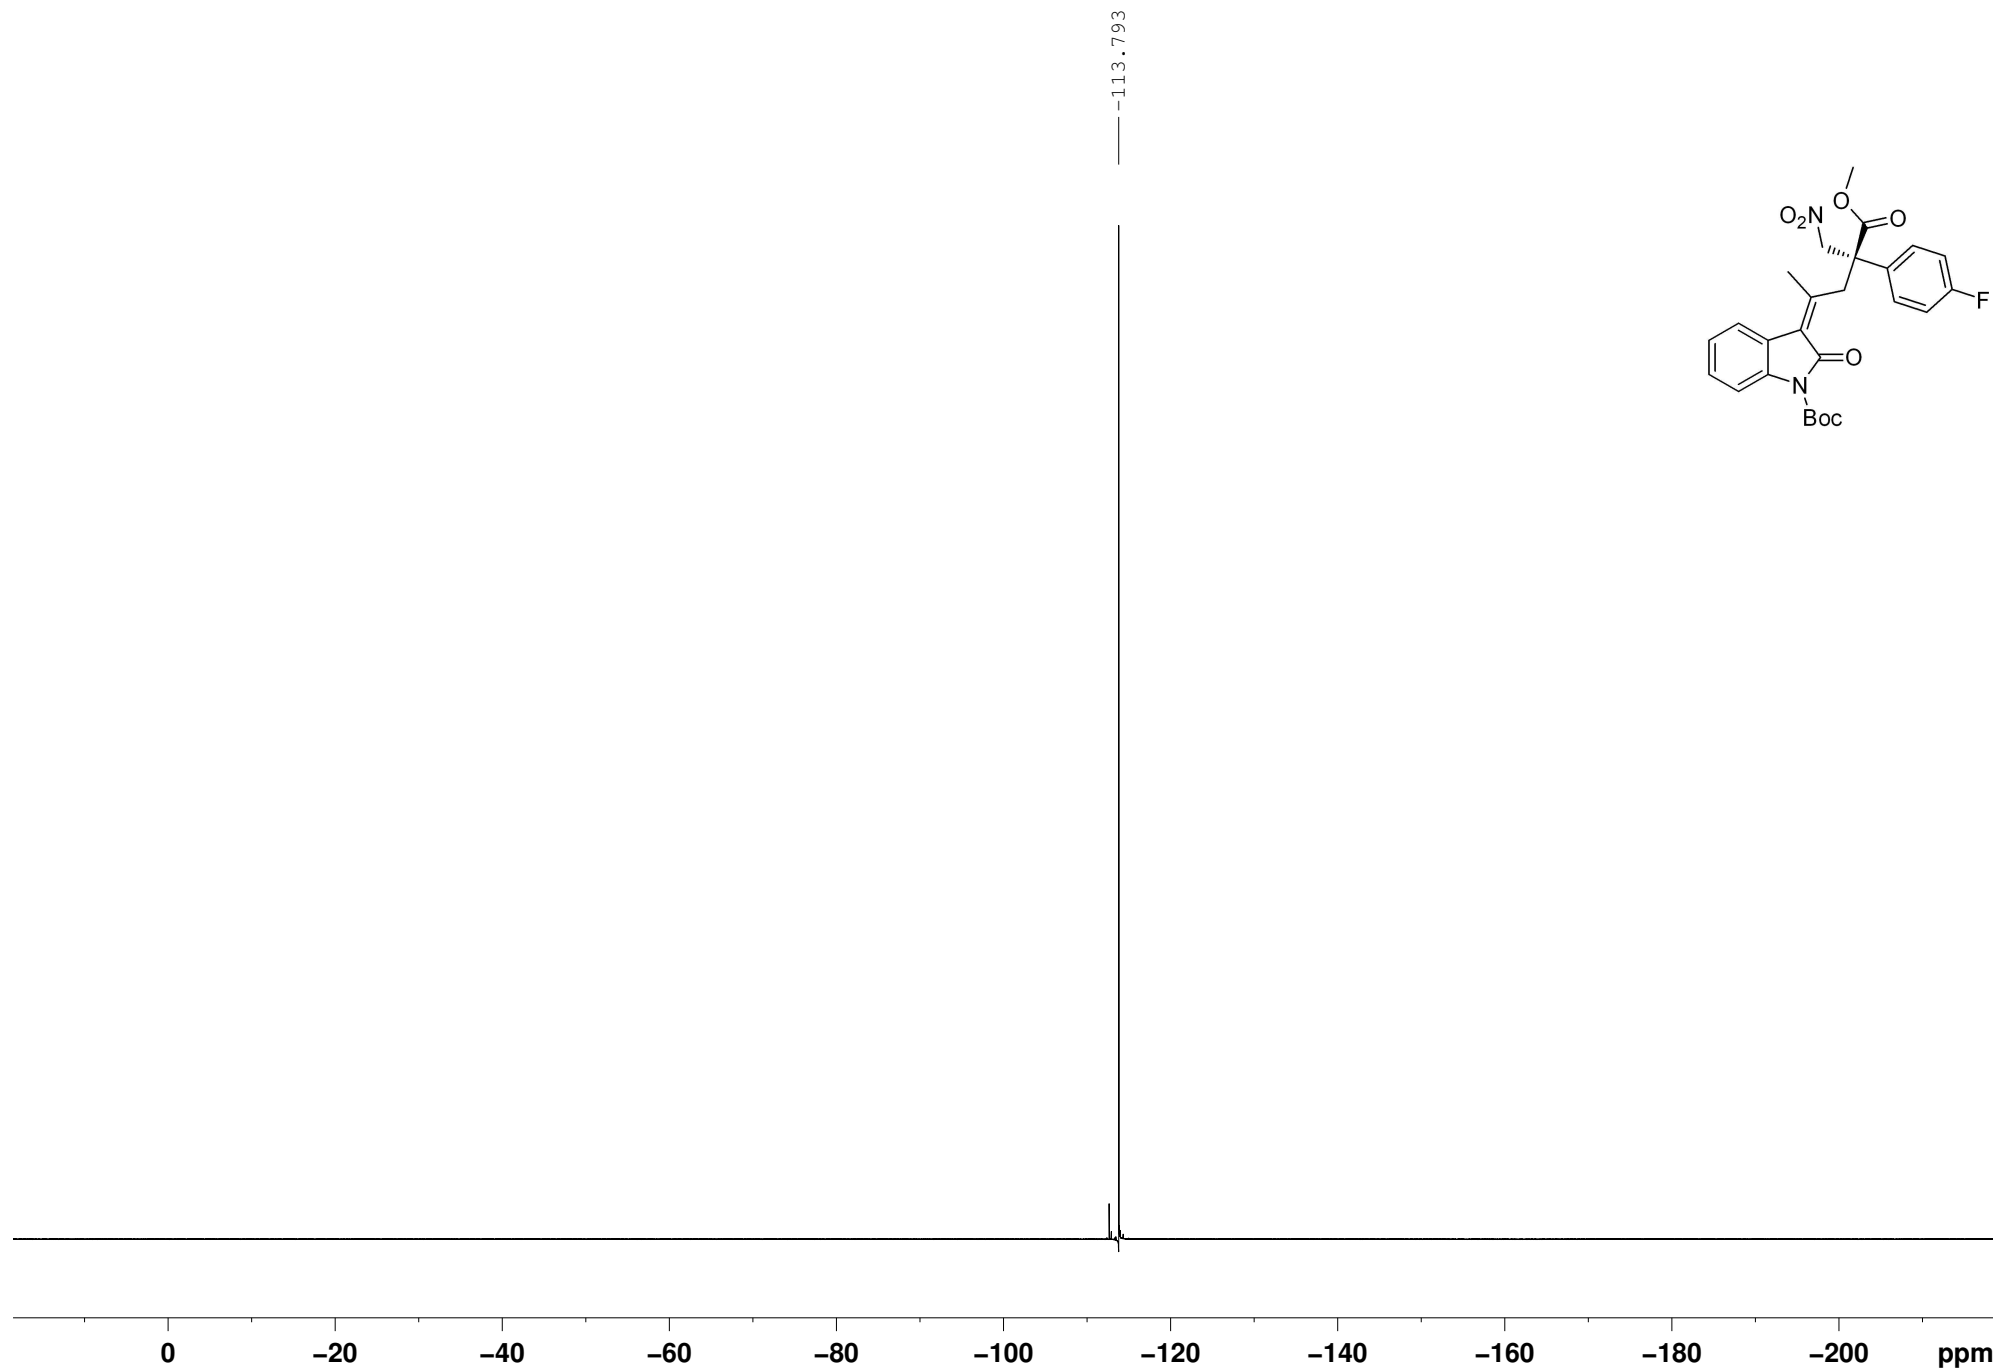

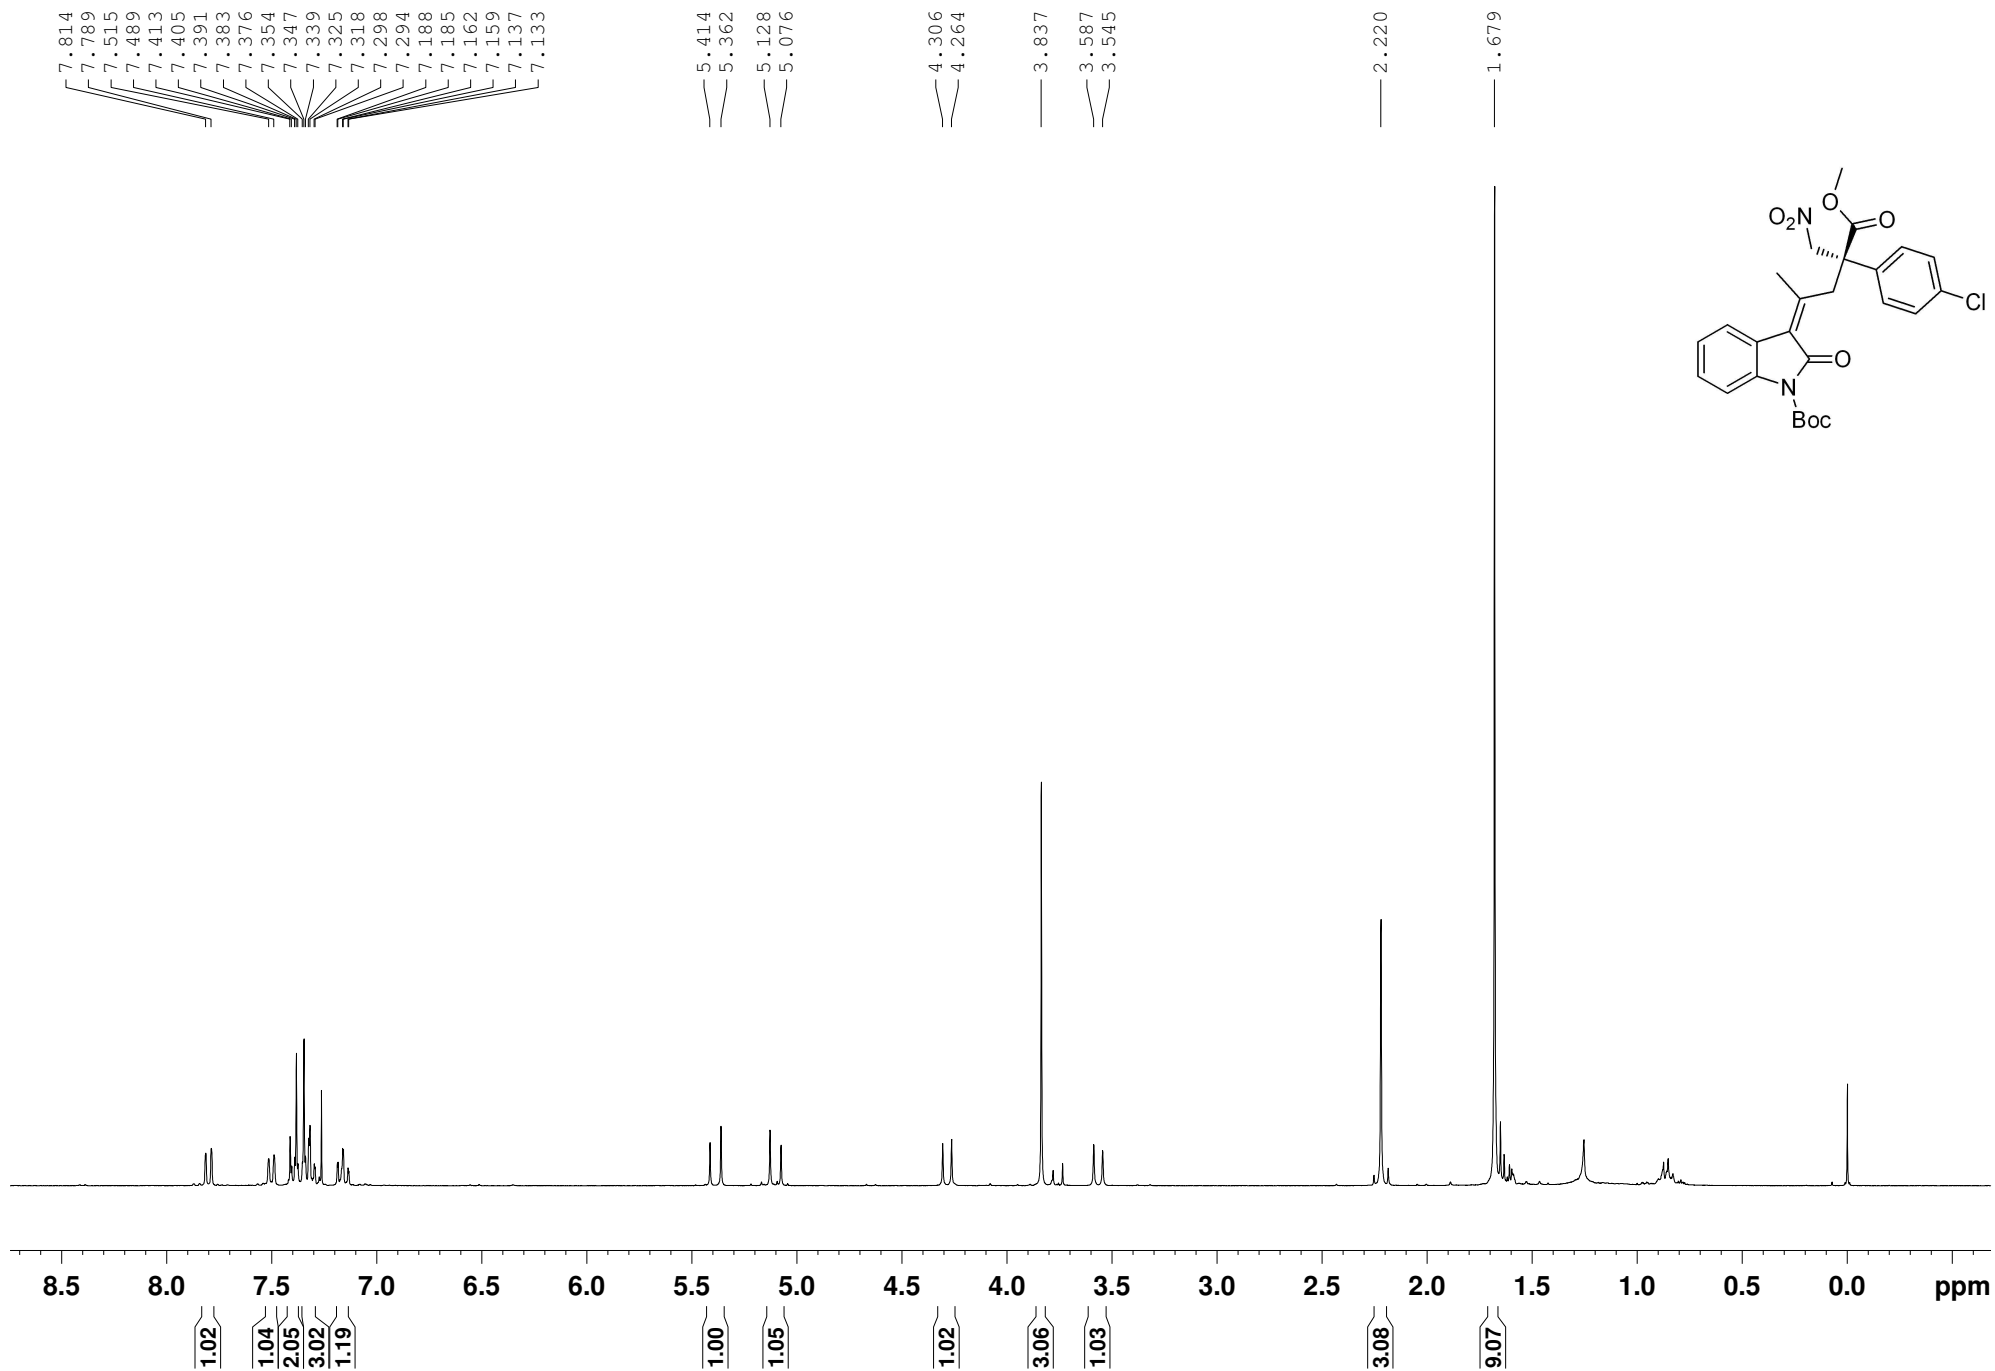

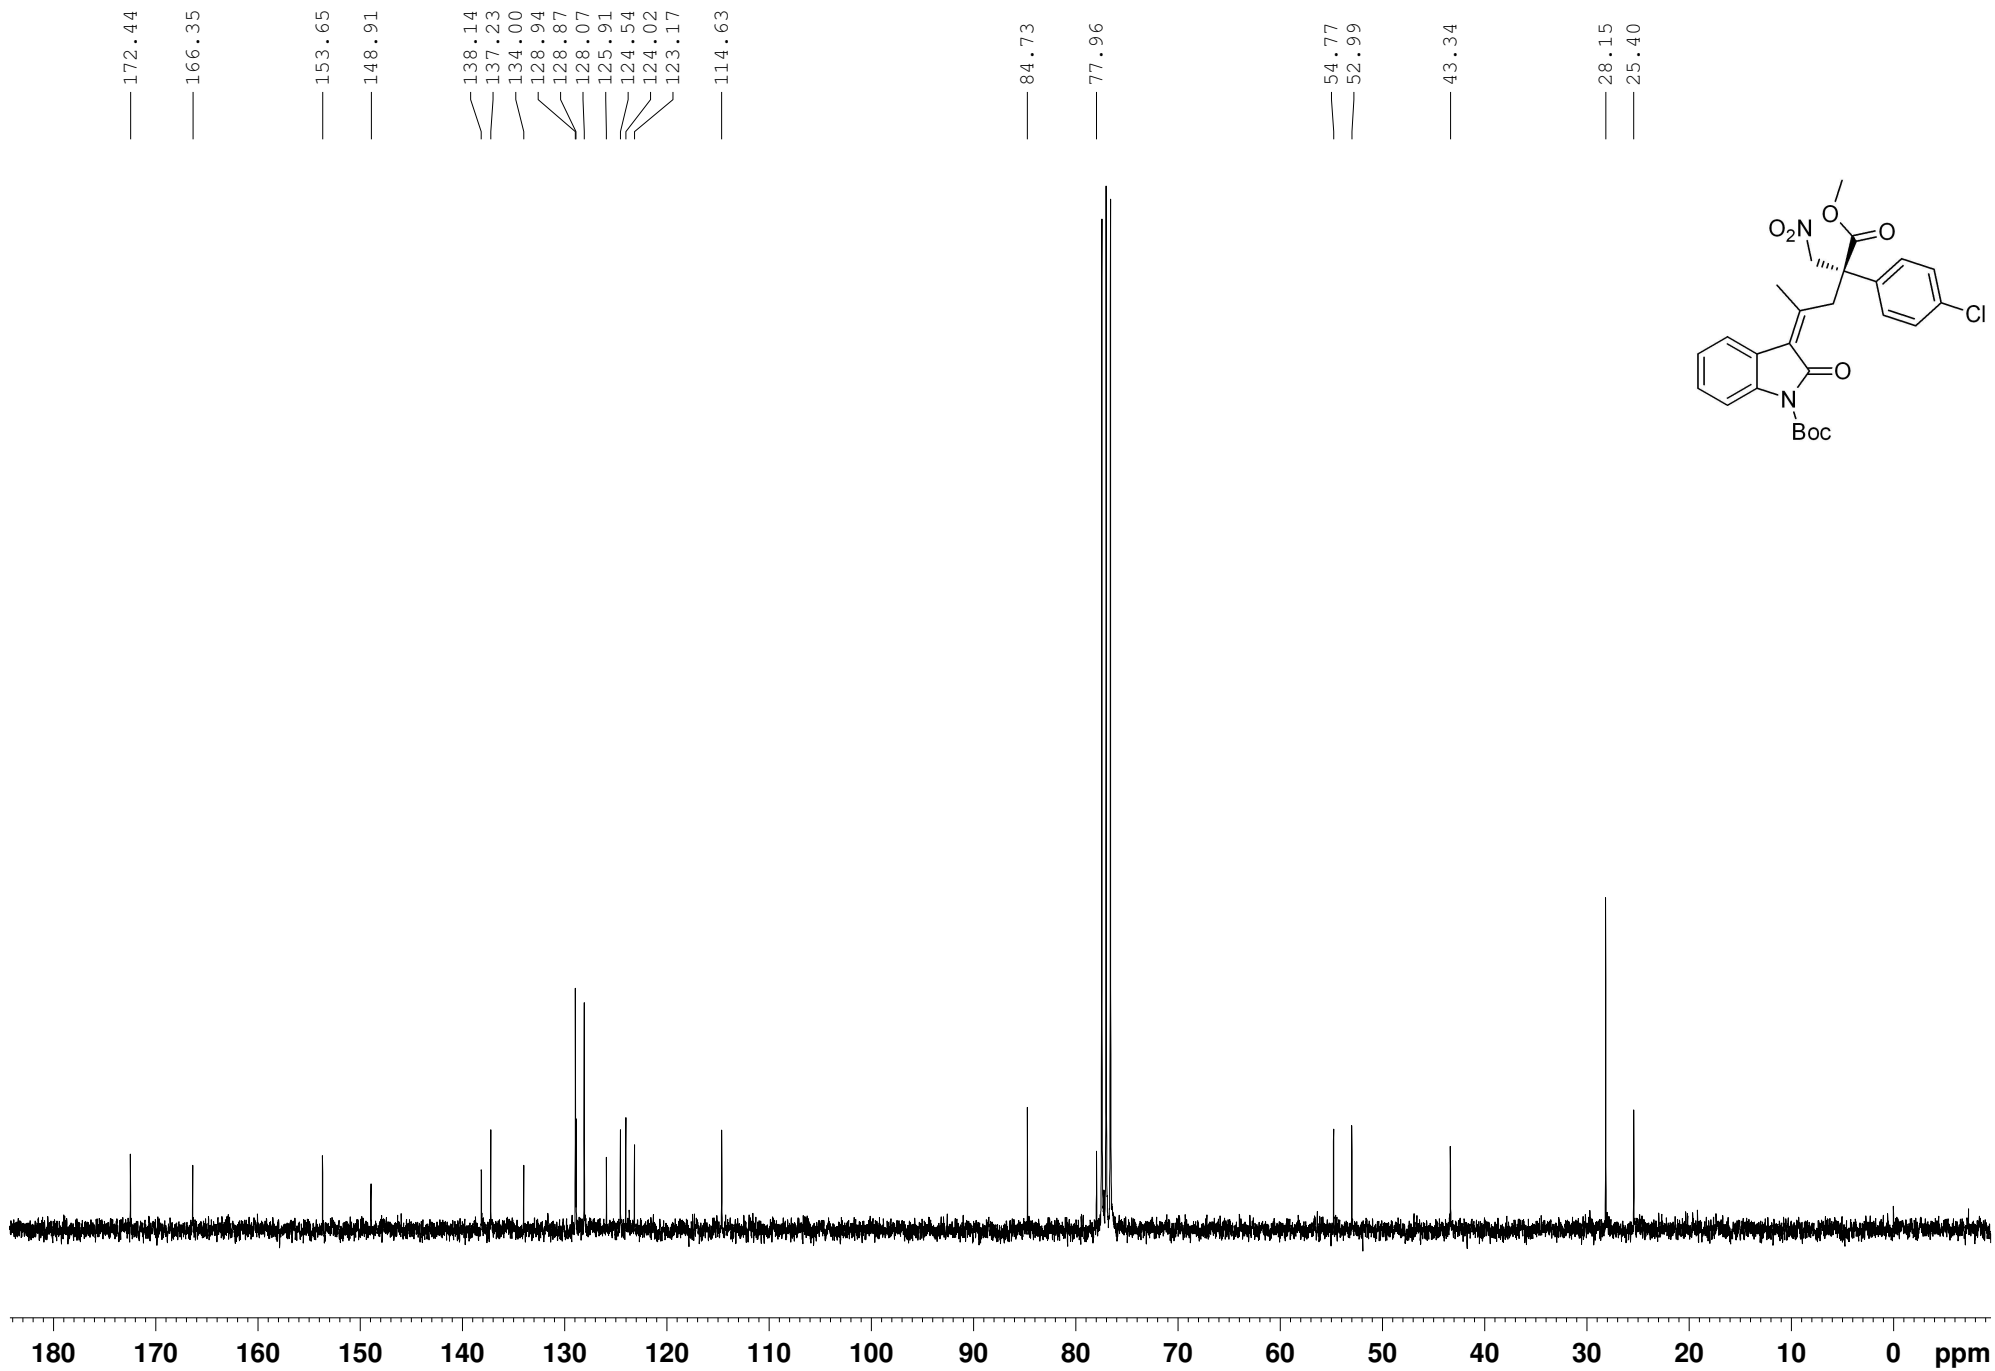



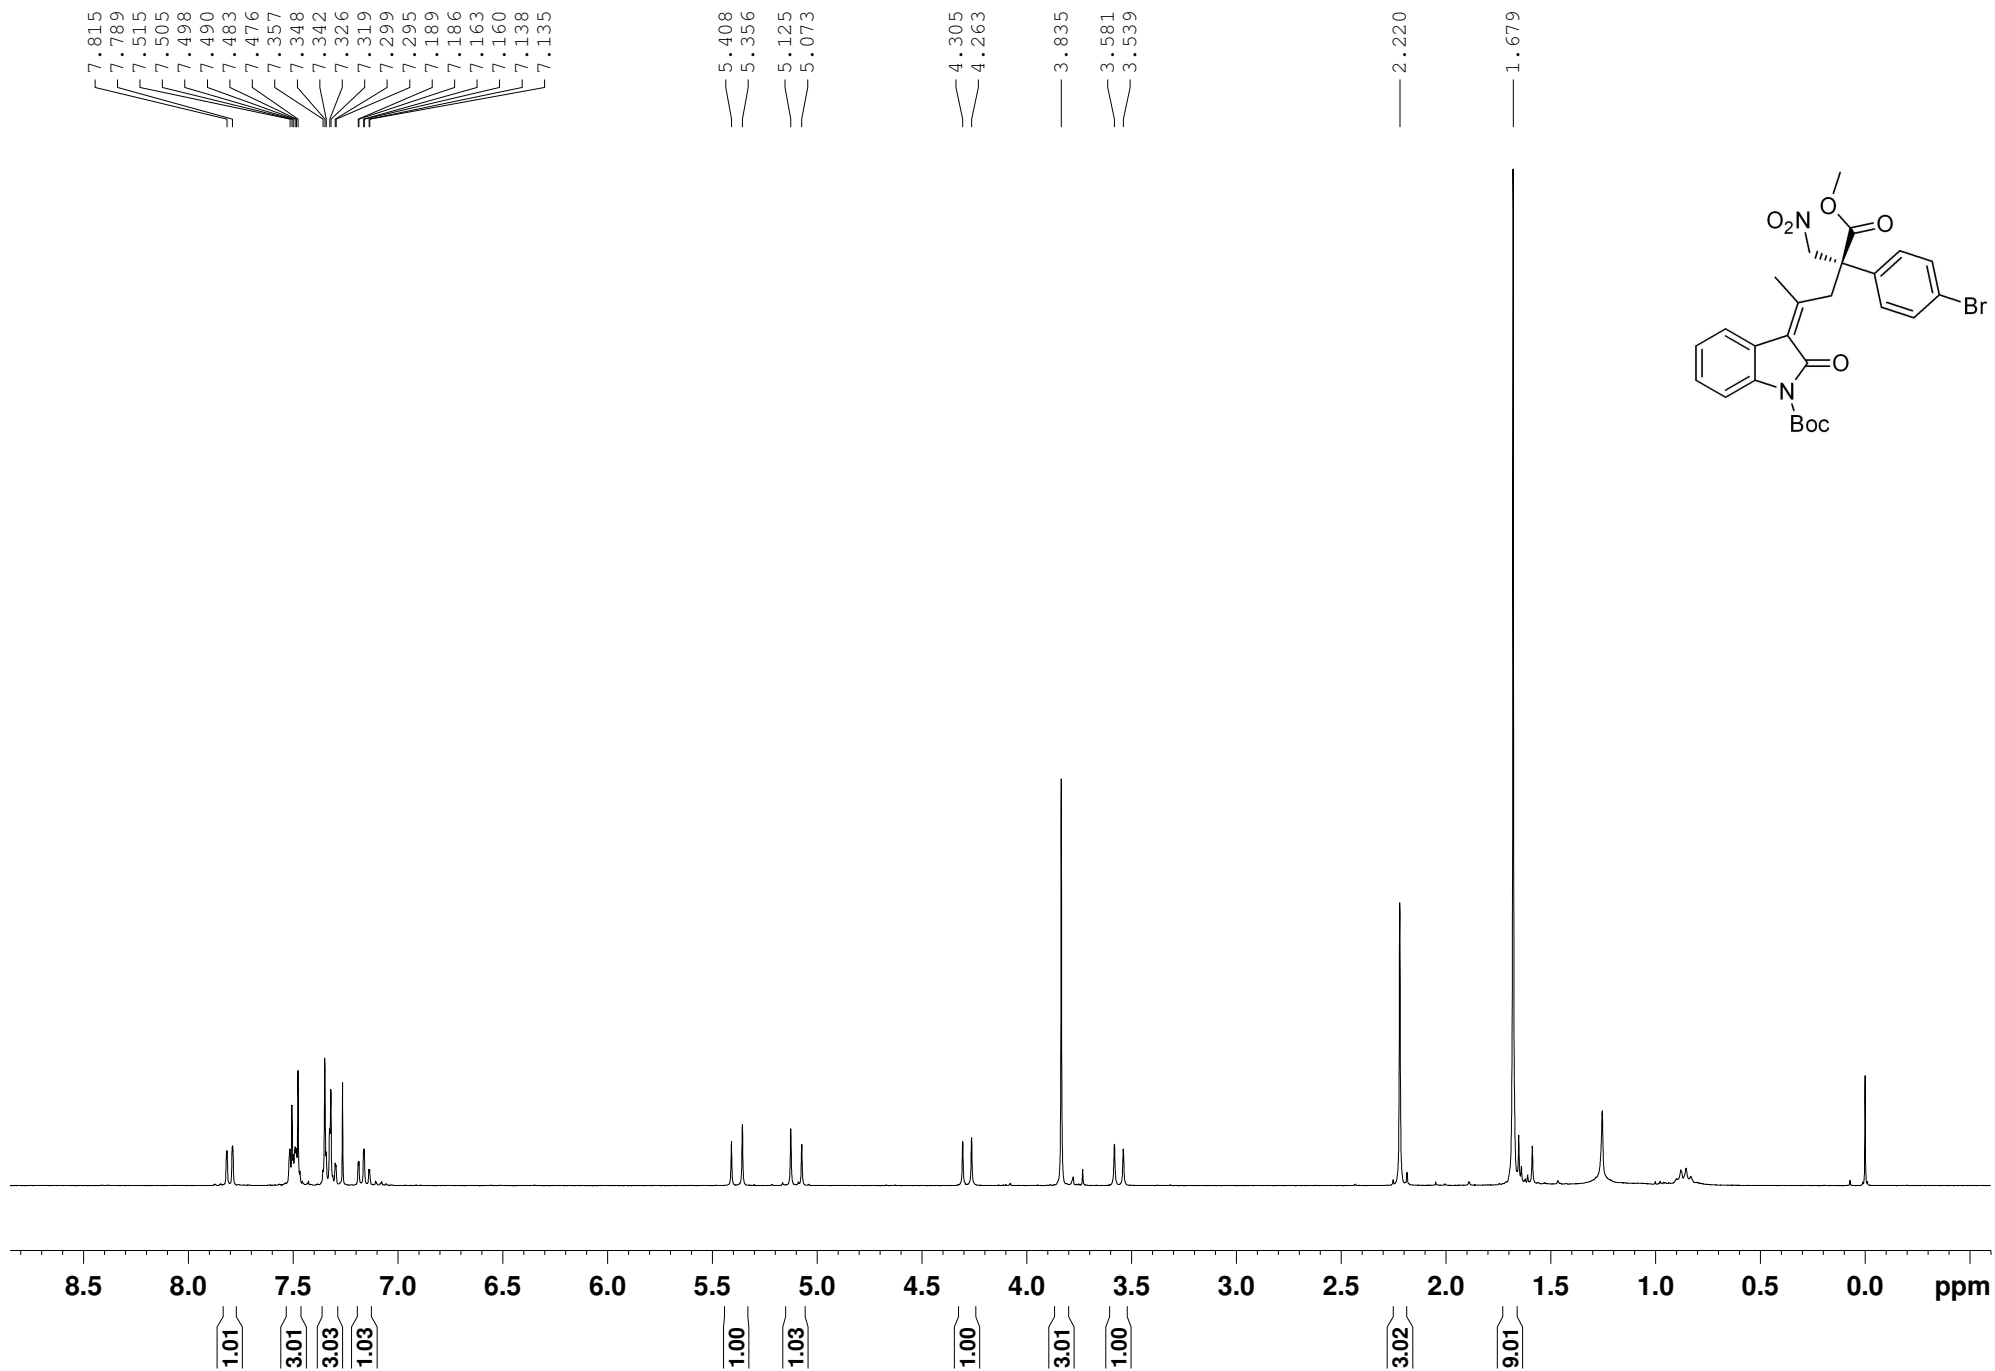

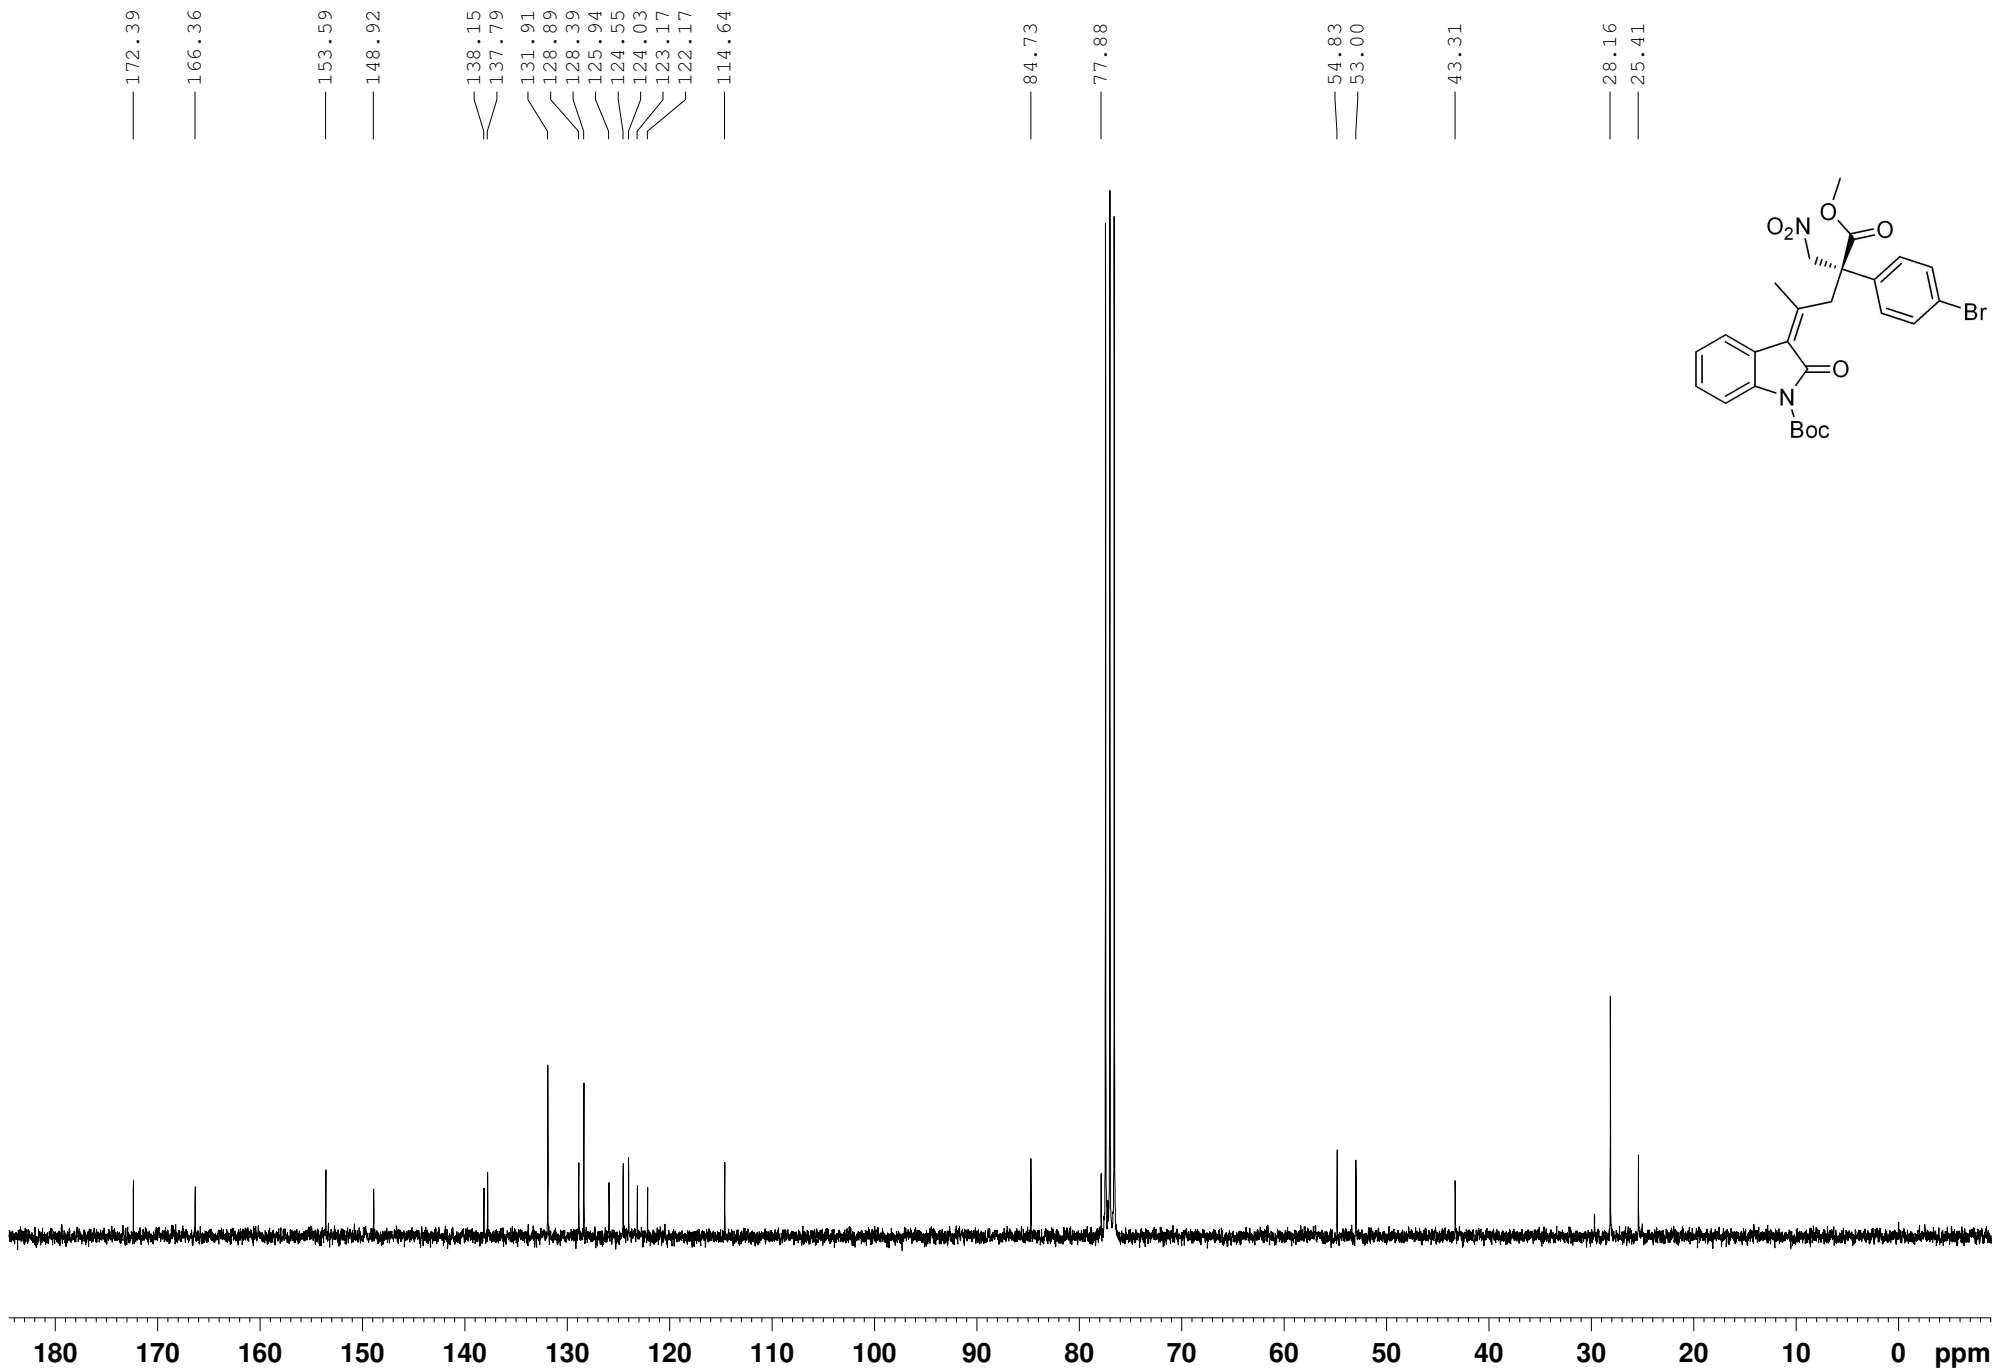

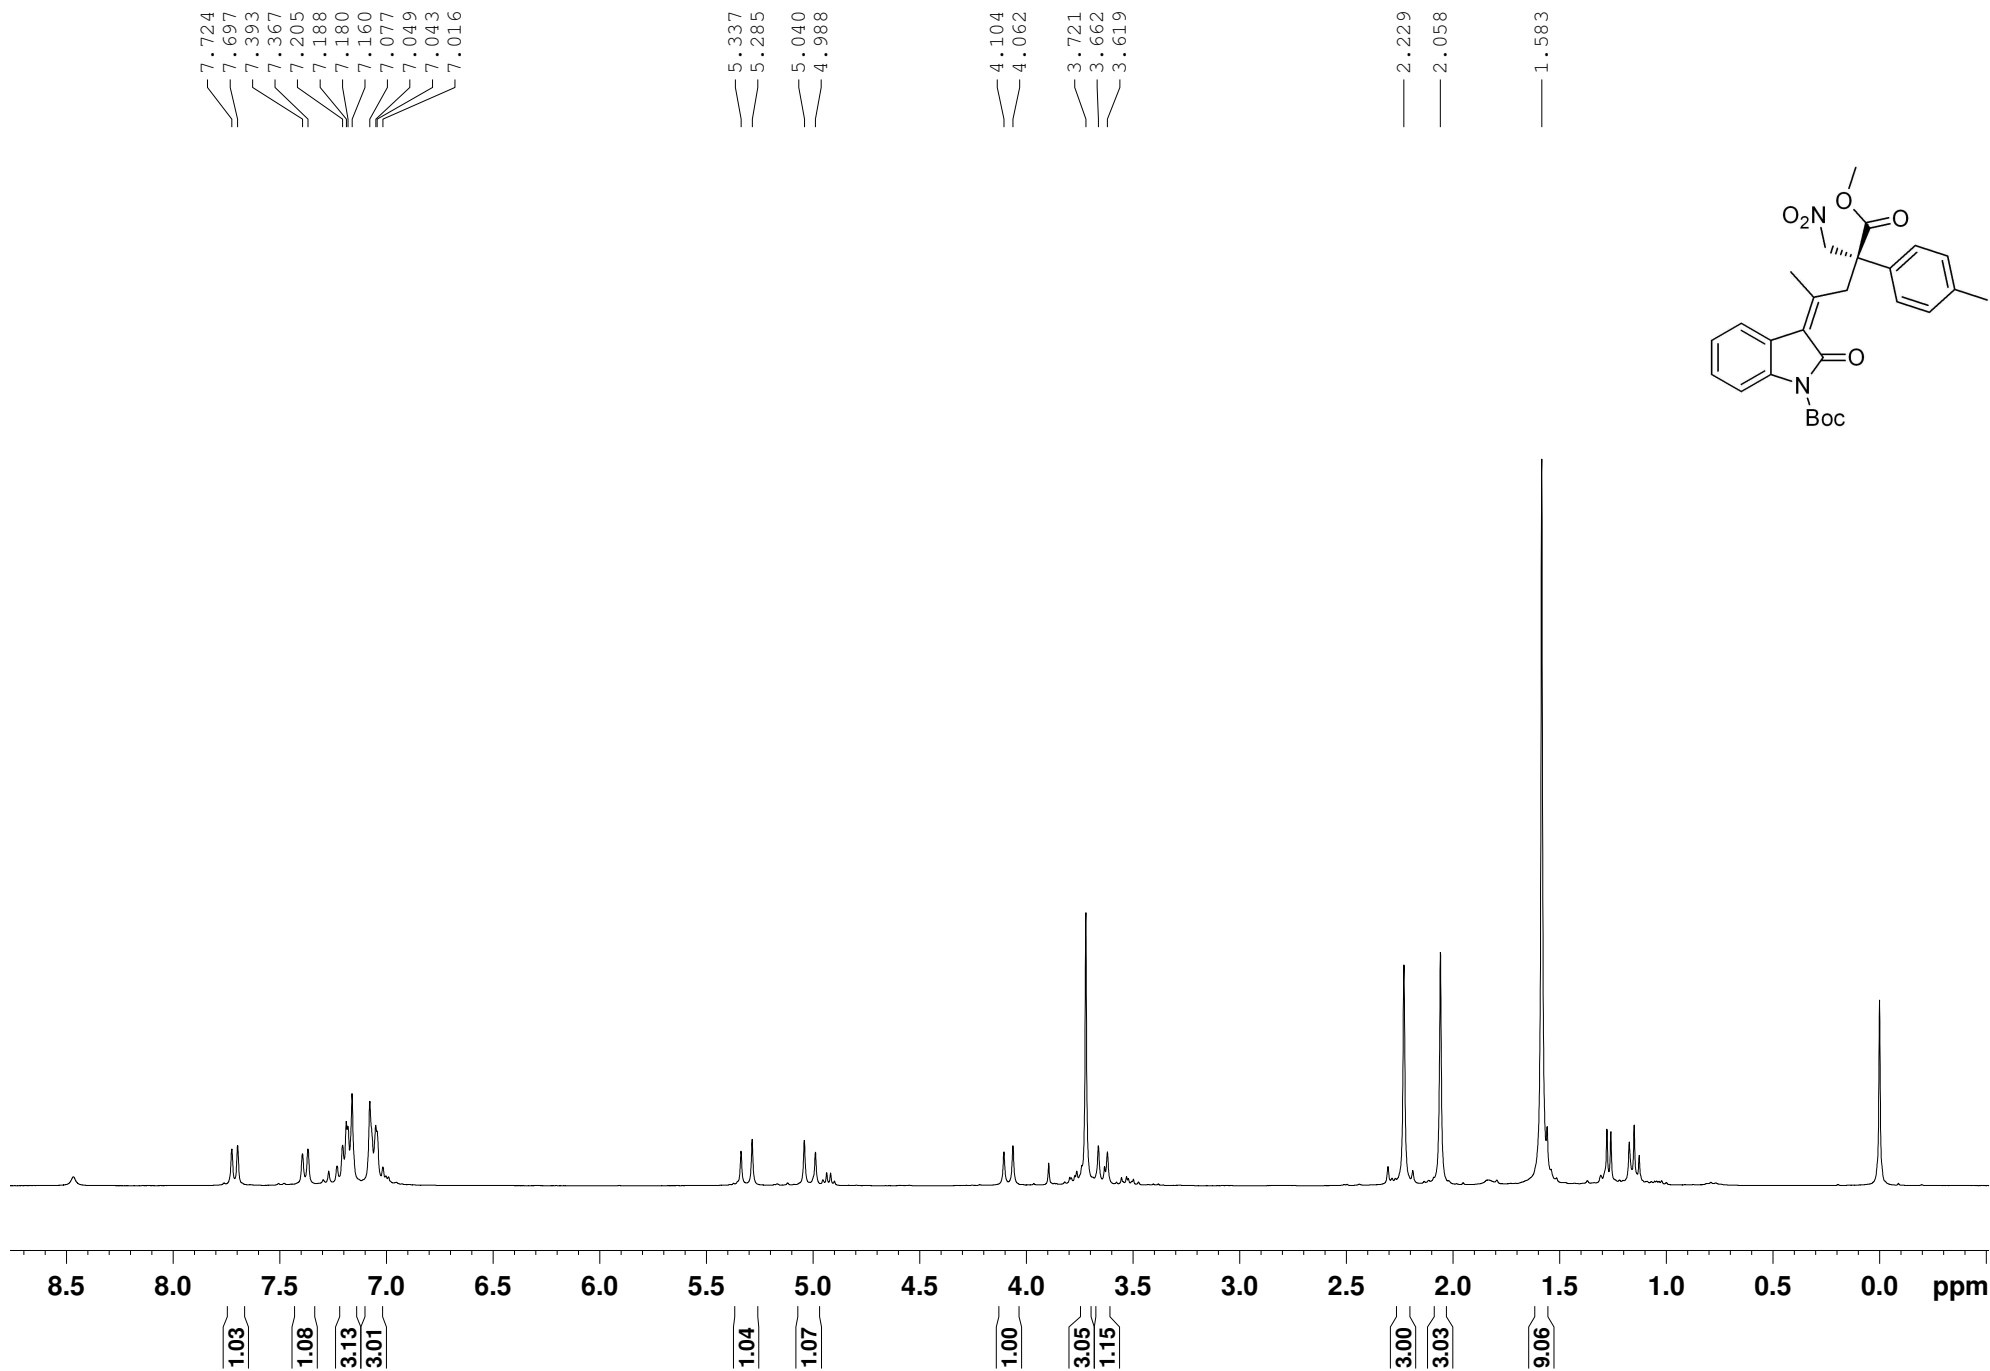

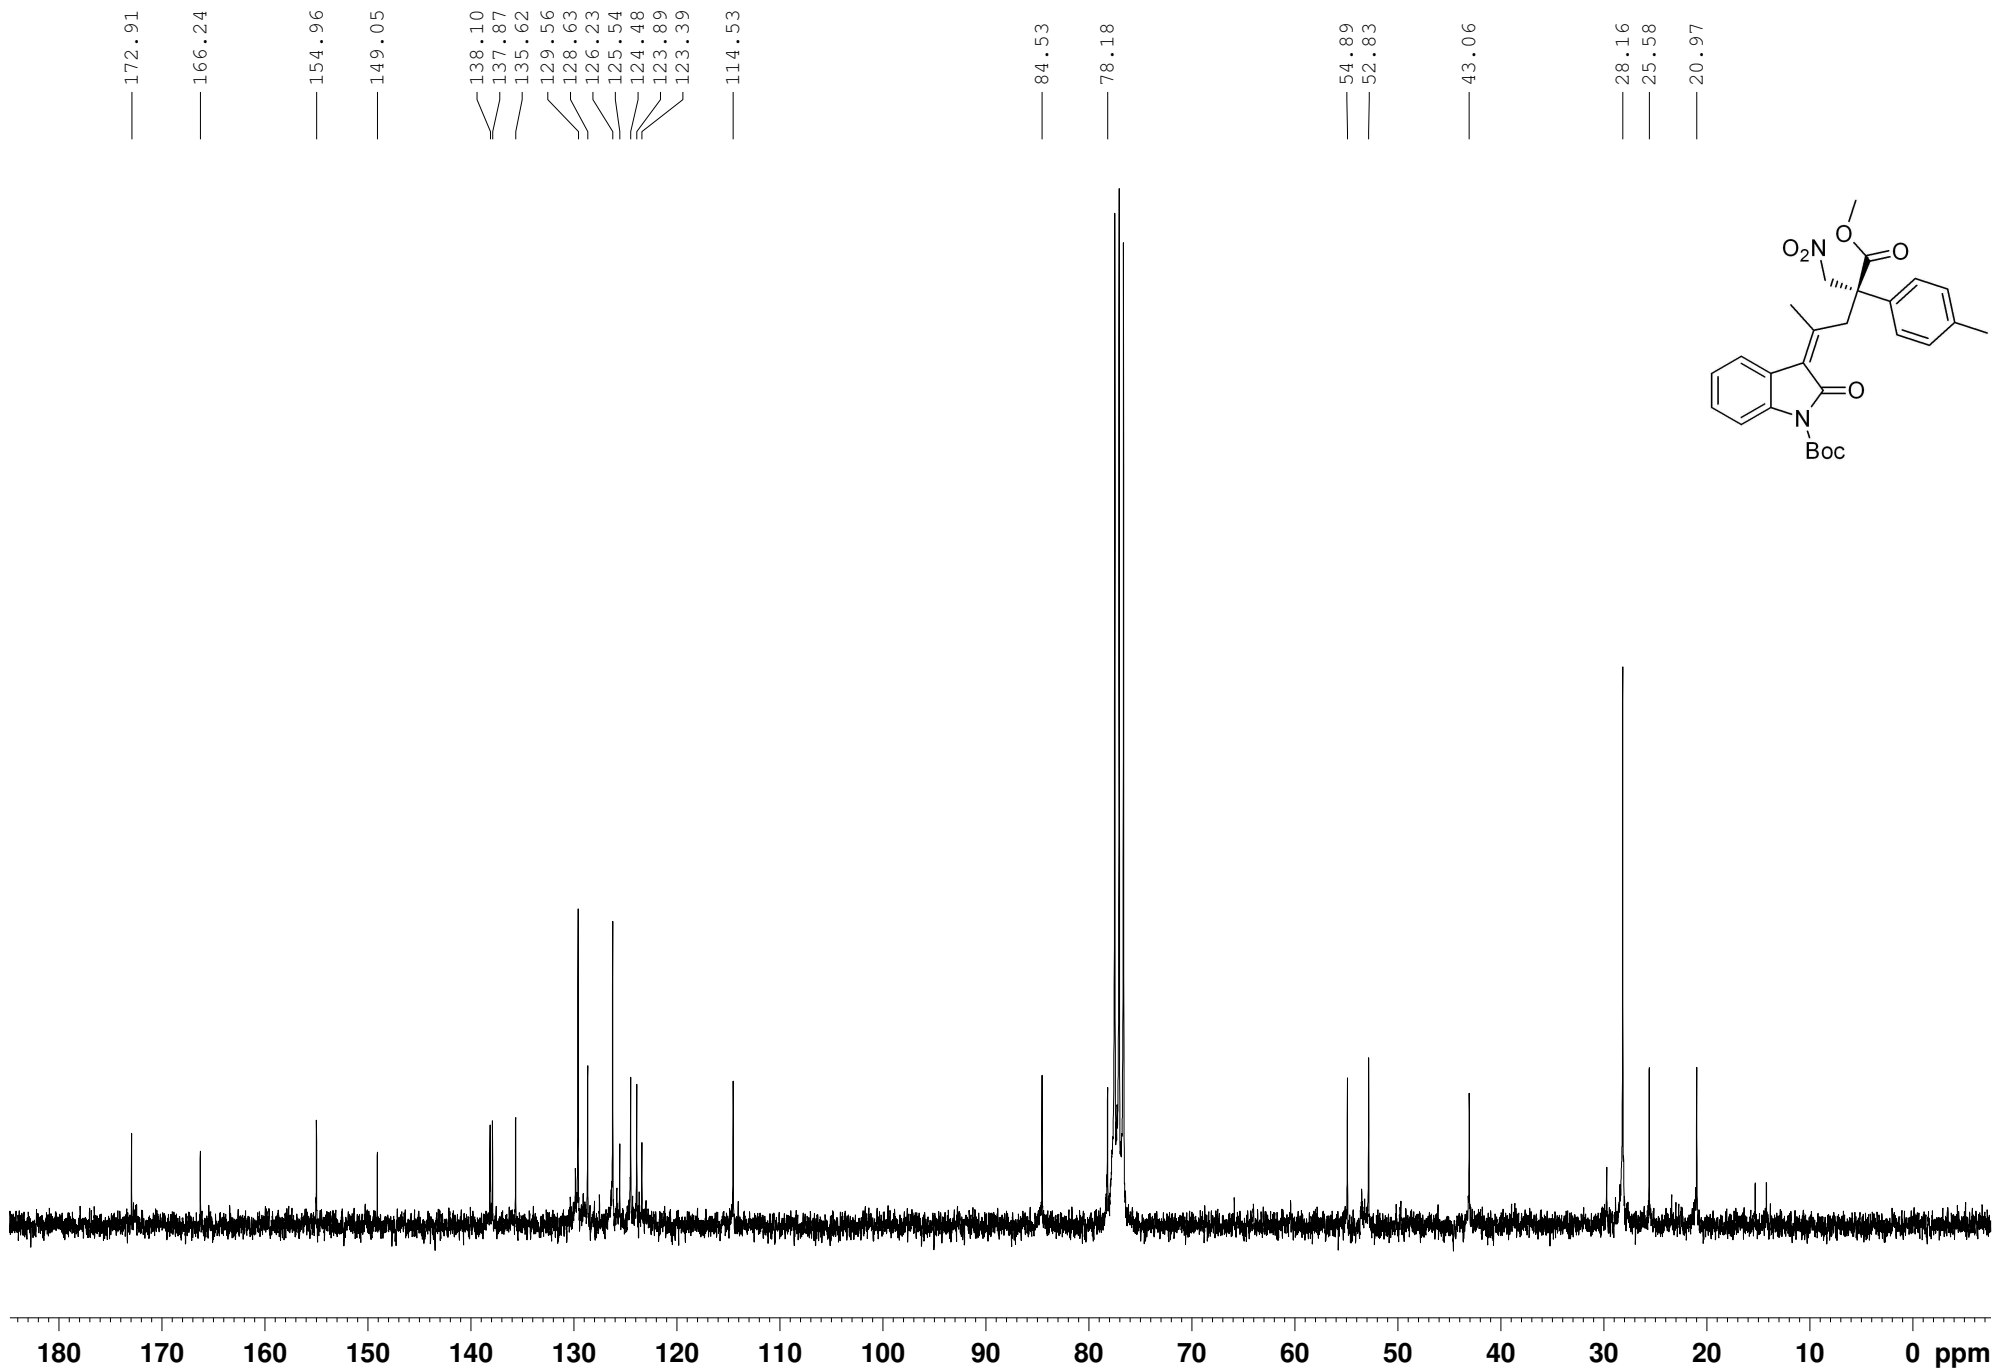

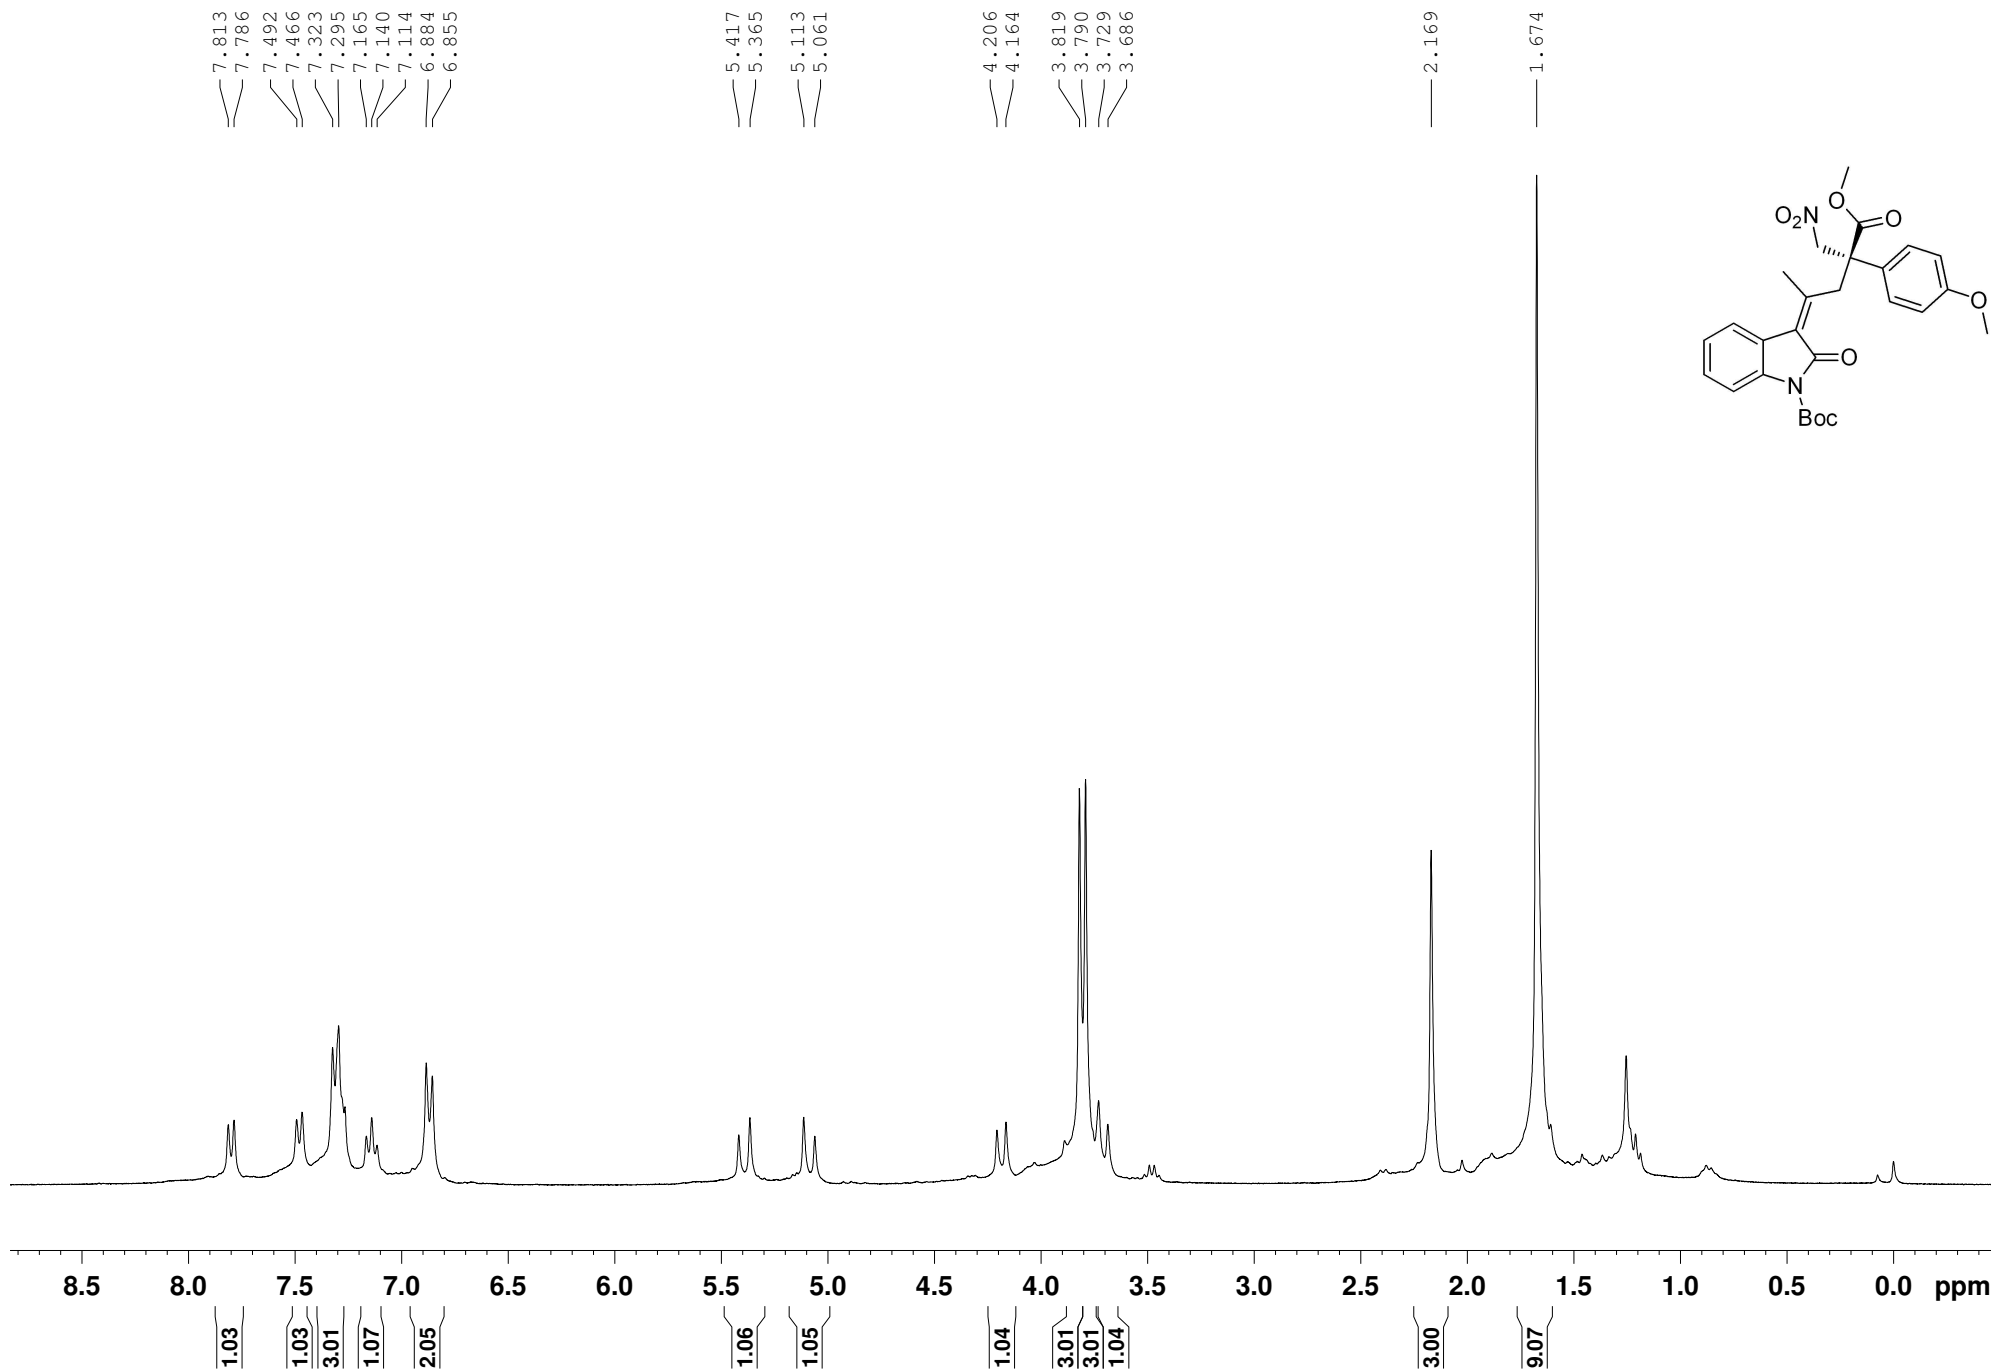

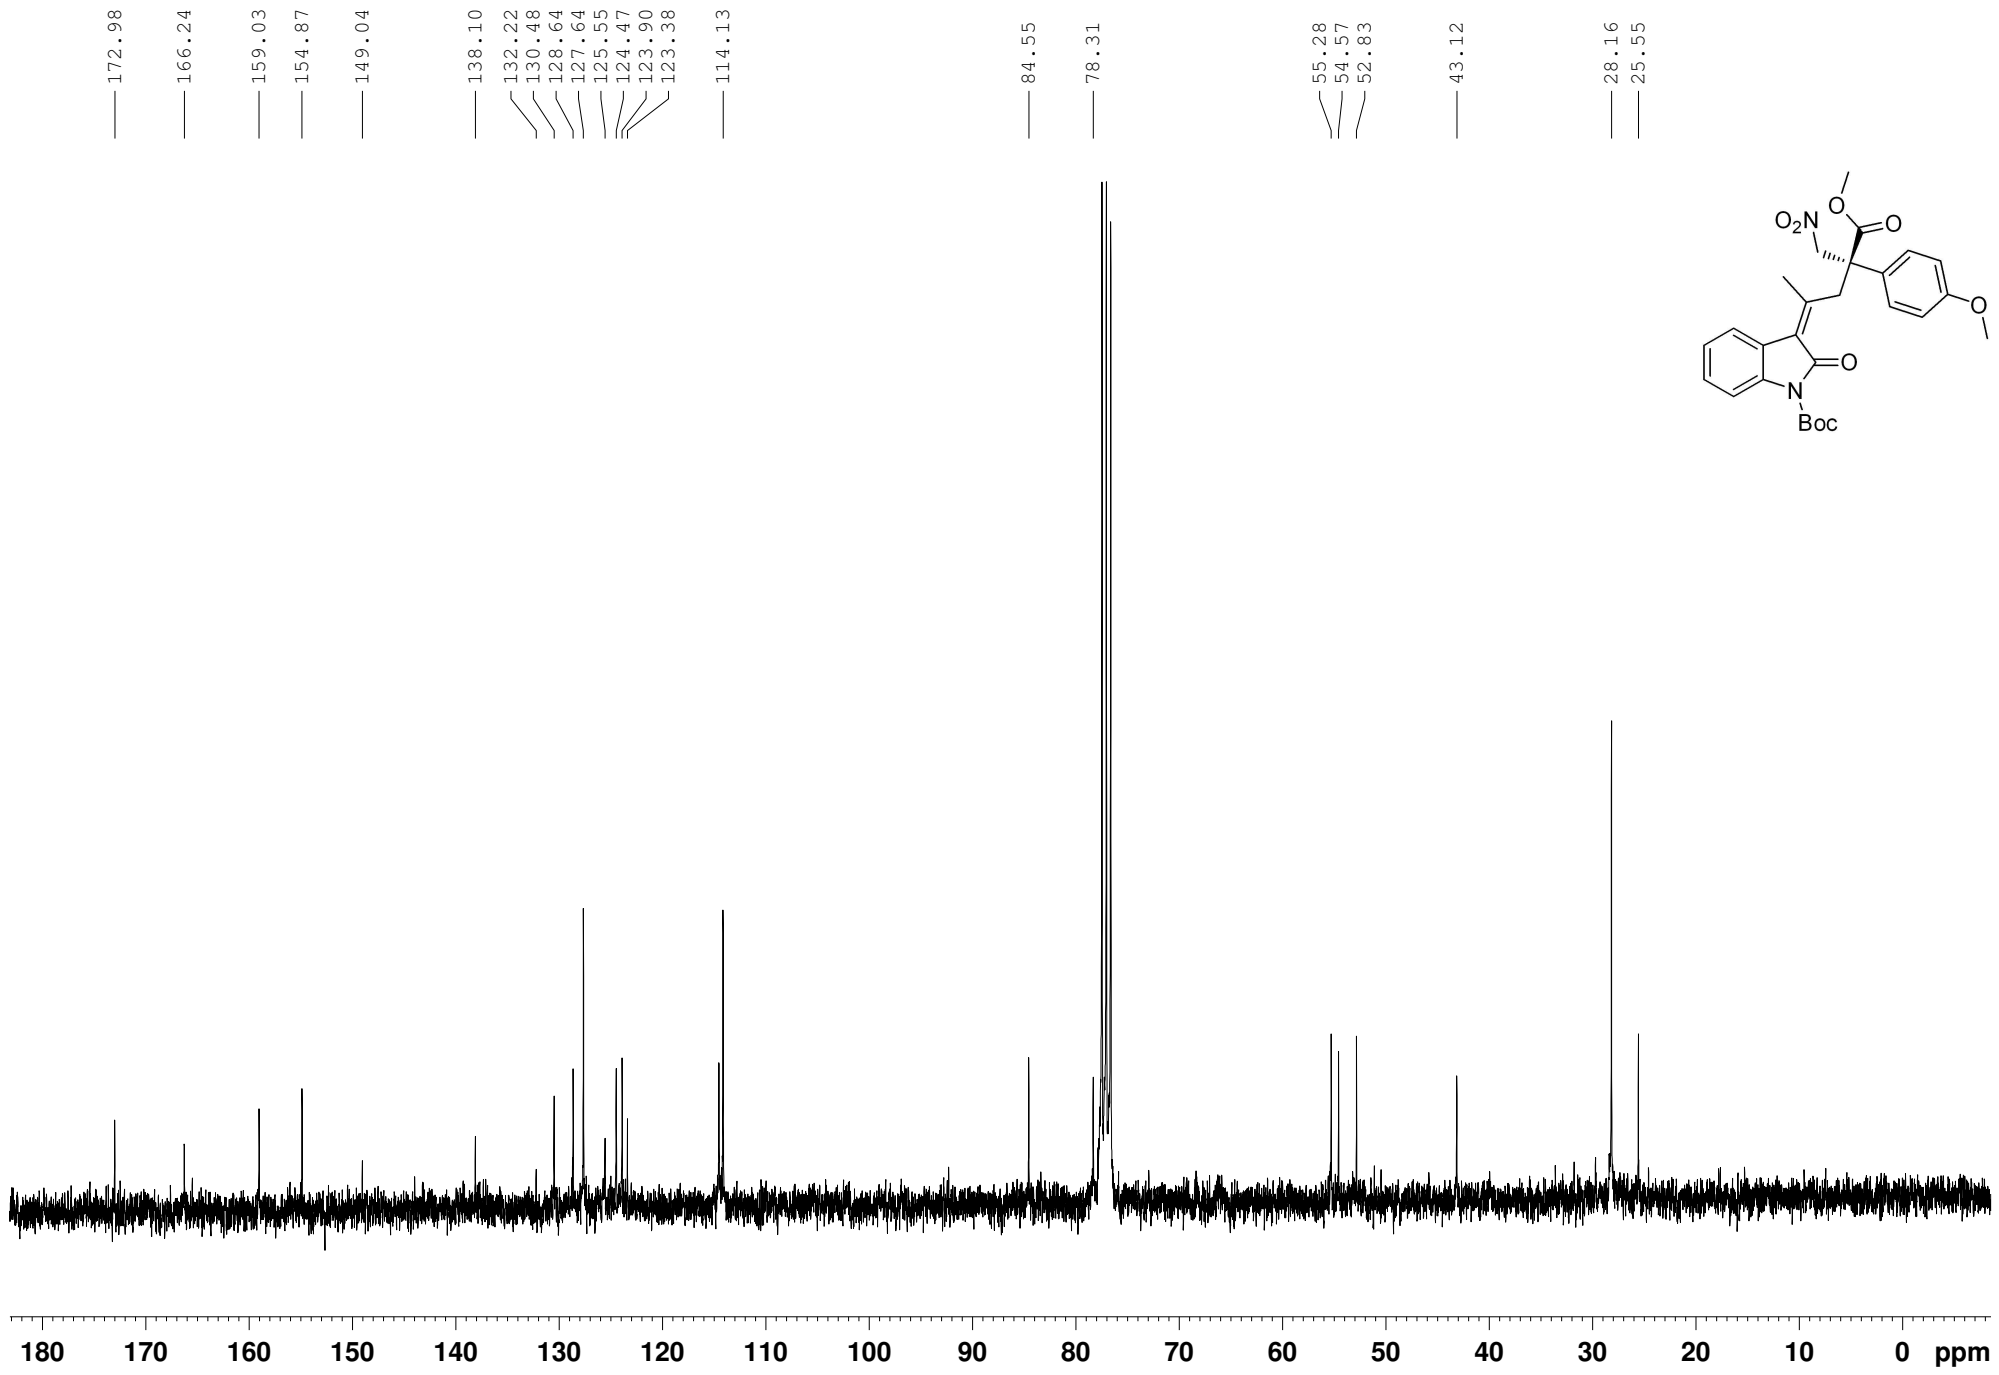

— 172.98

— 166.24

— 159.03

— 154.87

— 149.04

— 138.10

— 132.22

— 130.48

— 128.64

— 127.64

— 125.55

— 124.47

— 123.90

— 123.38

— 114.13

— 84.55

— 78.31

— 55.28

— 54.57

— 52.83

— 43.12

— 28.16

— 25.55

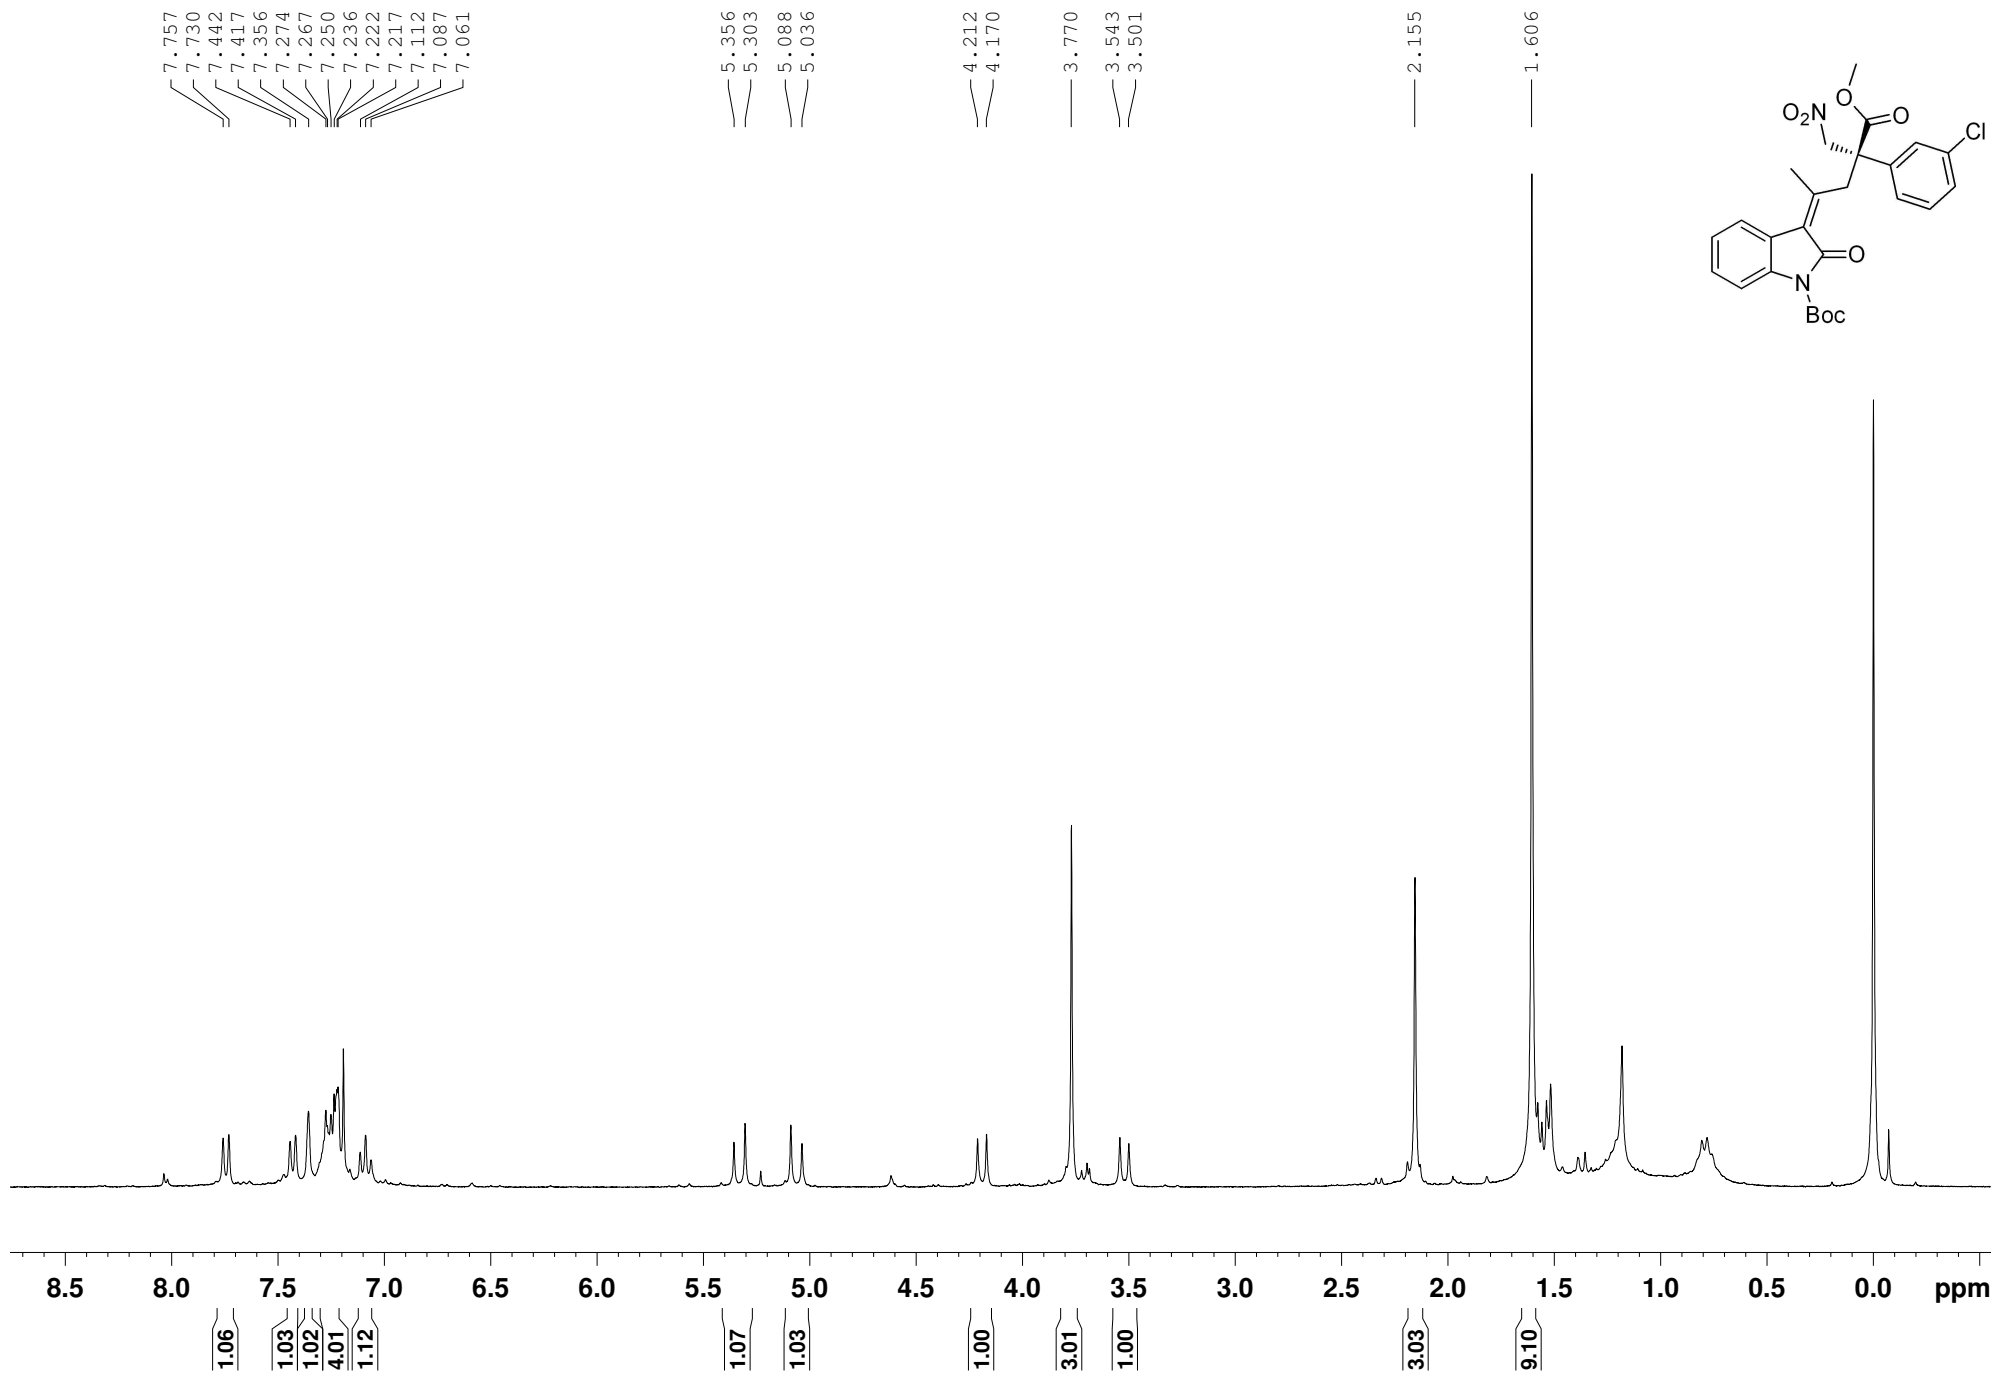

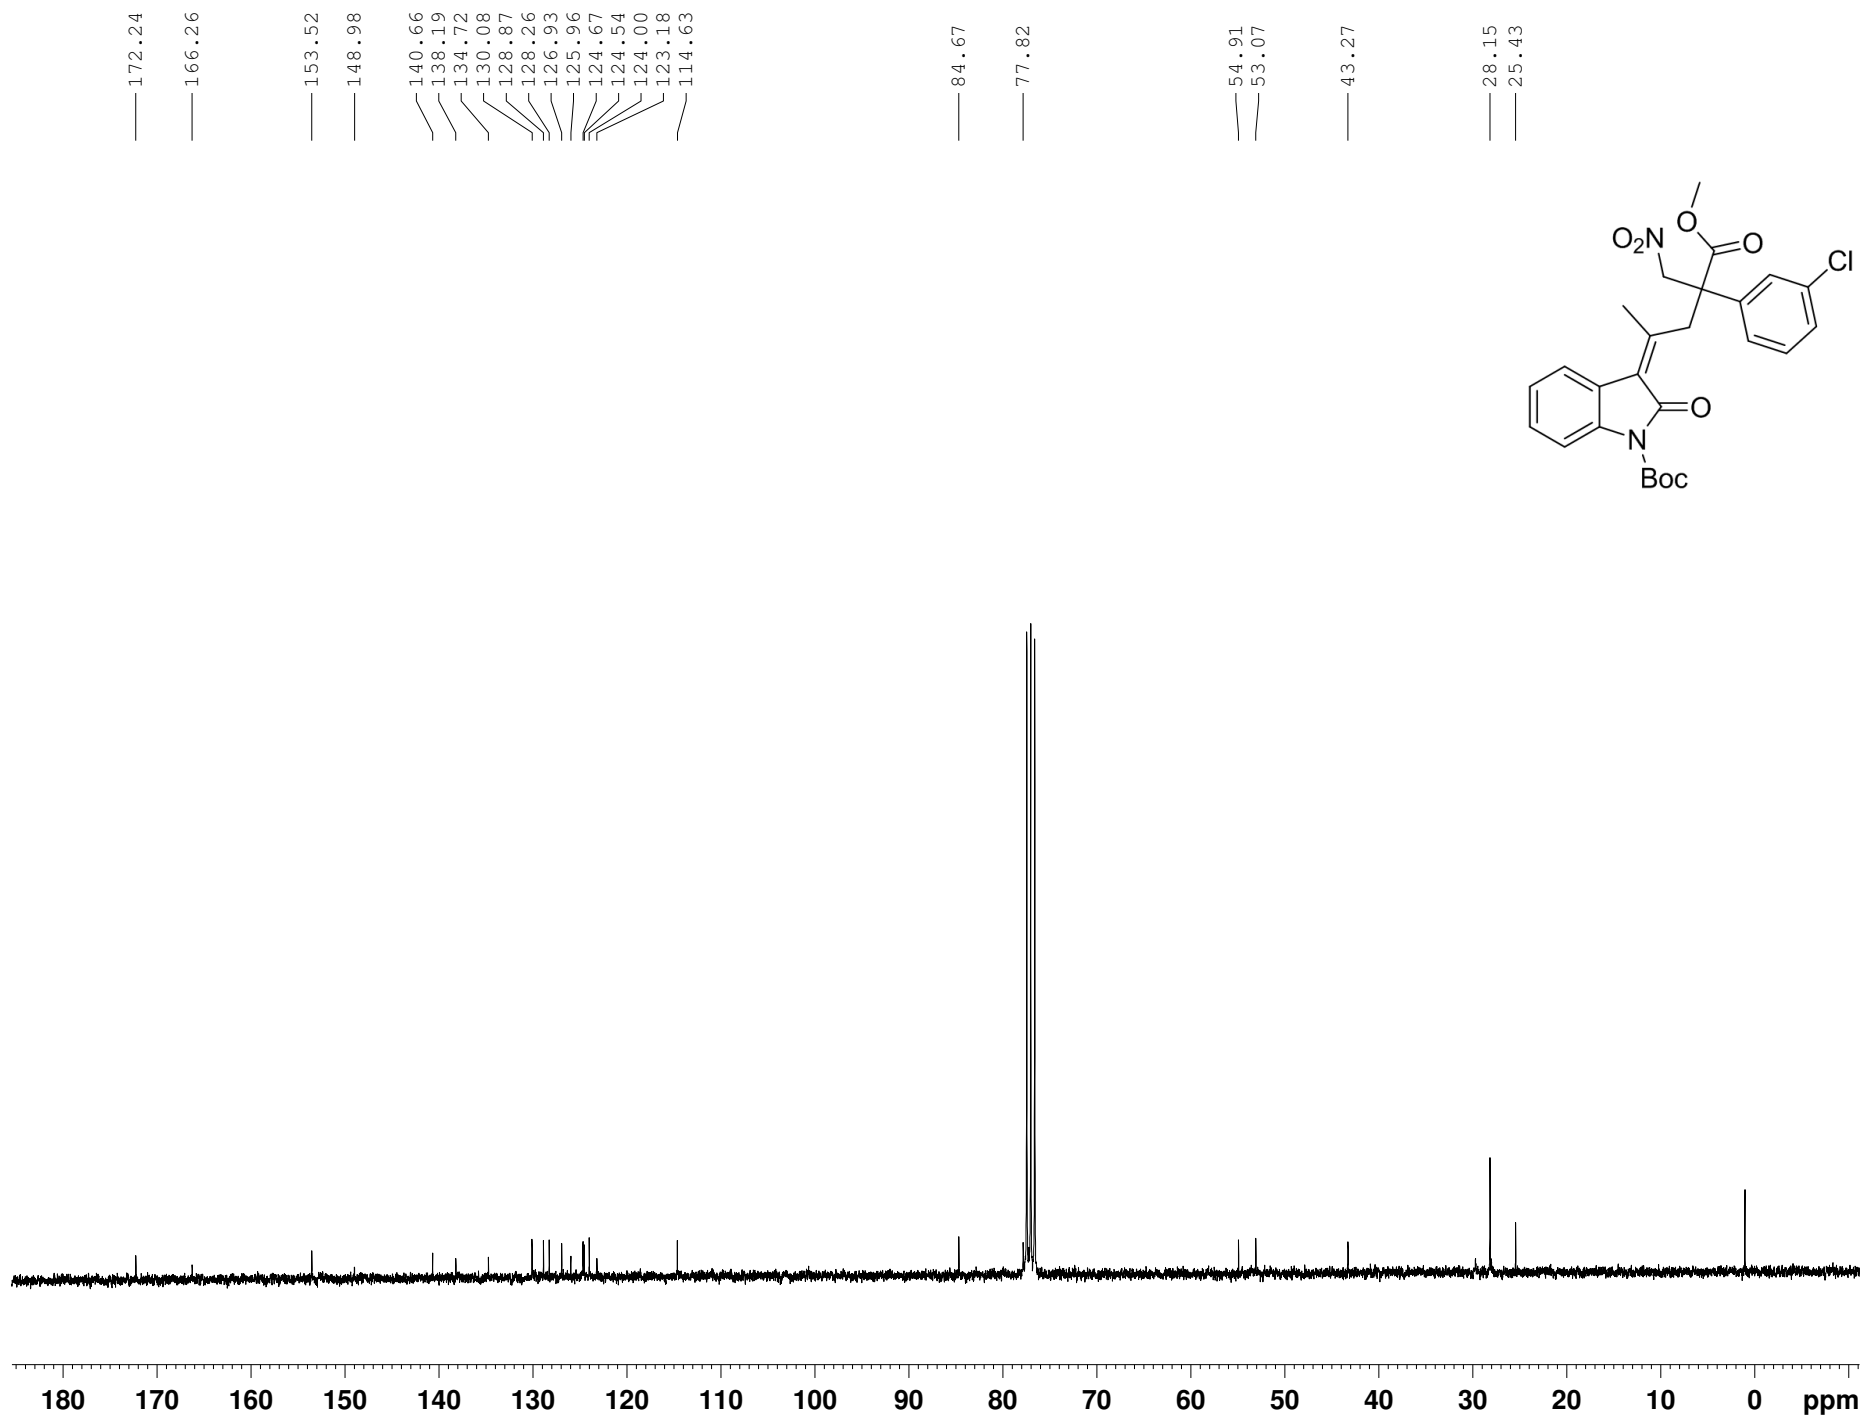



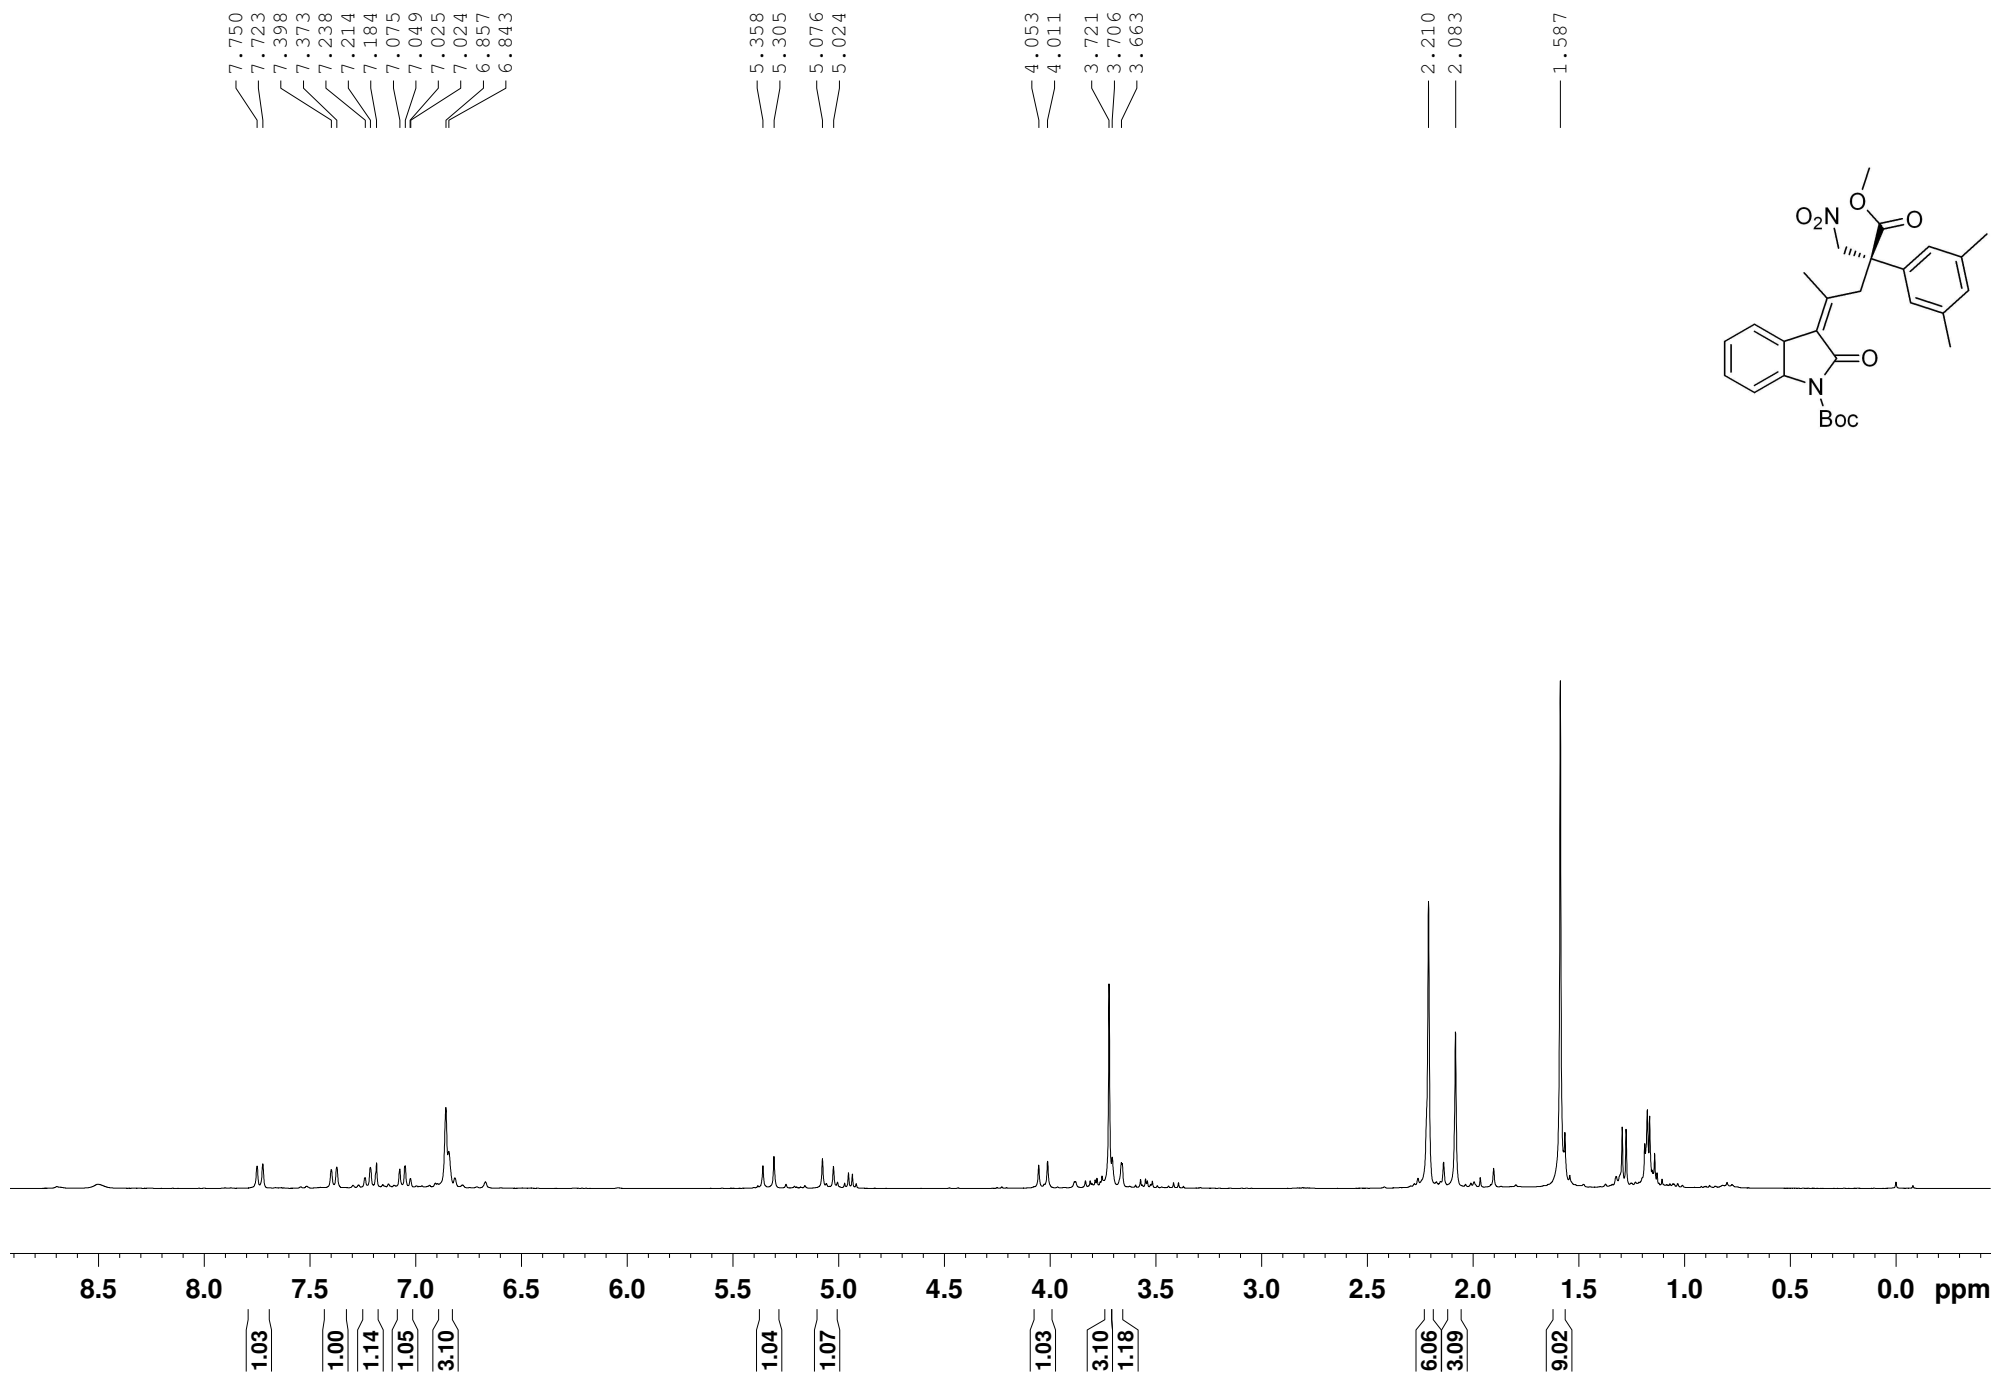

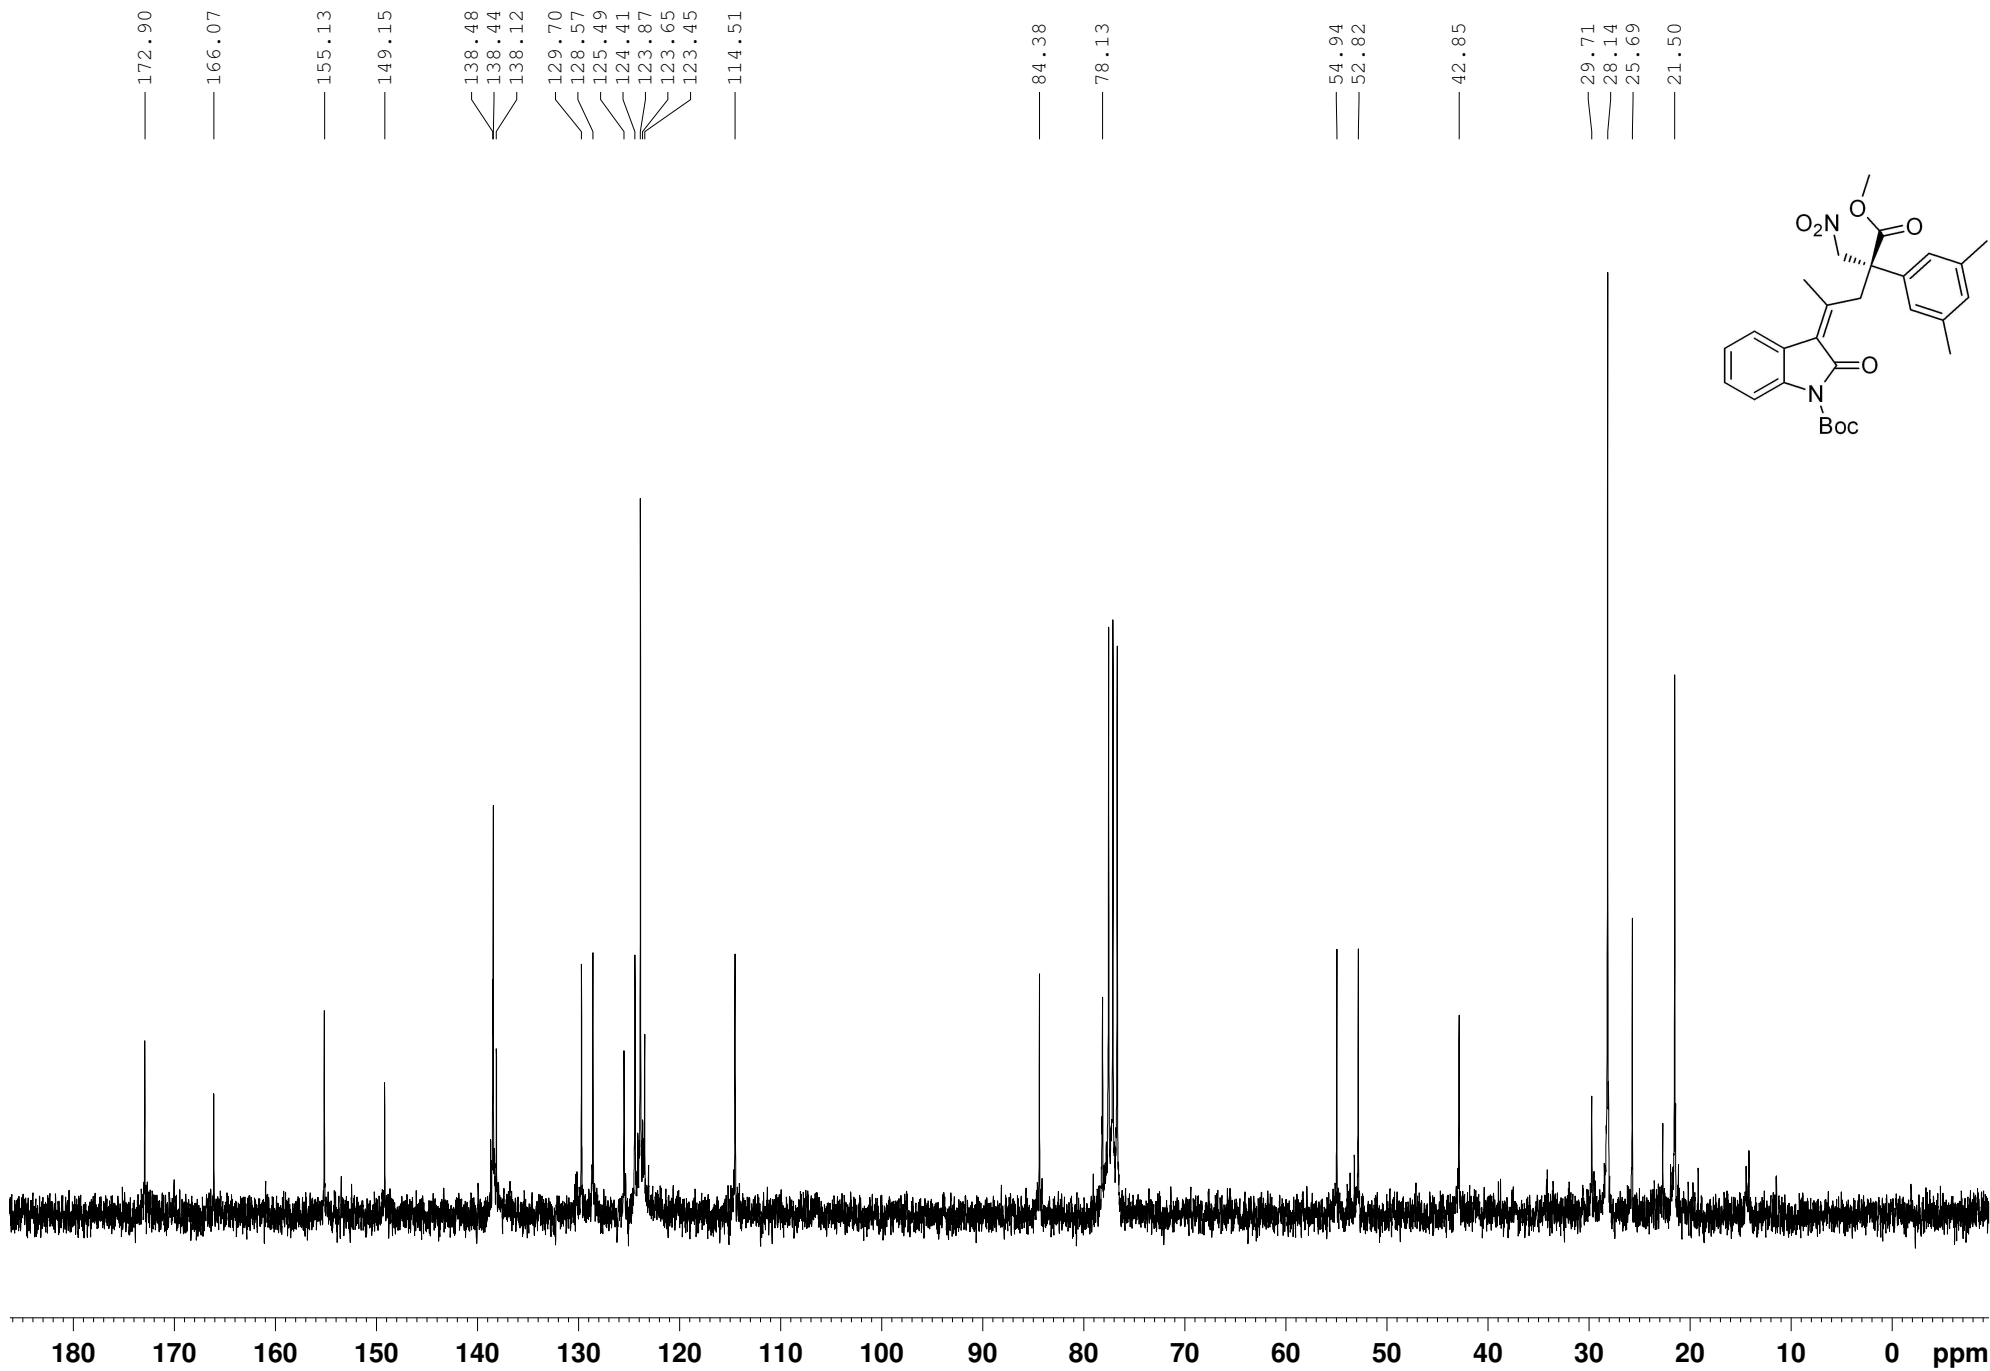

— 172.90

— 166.07

— 155.13

— 149.15

— 138.48

— 138.44

— 138.12

— 129.70

— 128.57

— 125.49

— 124.41

— 123.87

— 123.65

— 123.45

— 114.51

— 84.38

— 78.13

— 54.94

— 52.82

— 42.85

— 29.71

— 28.14

— 25.69

— 21.50

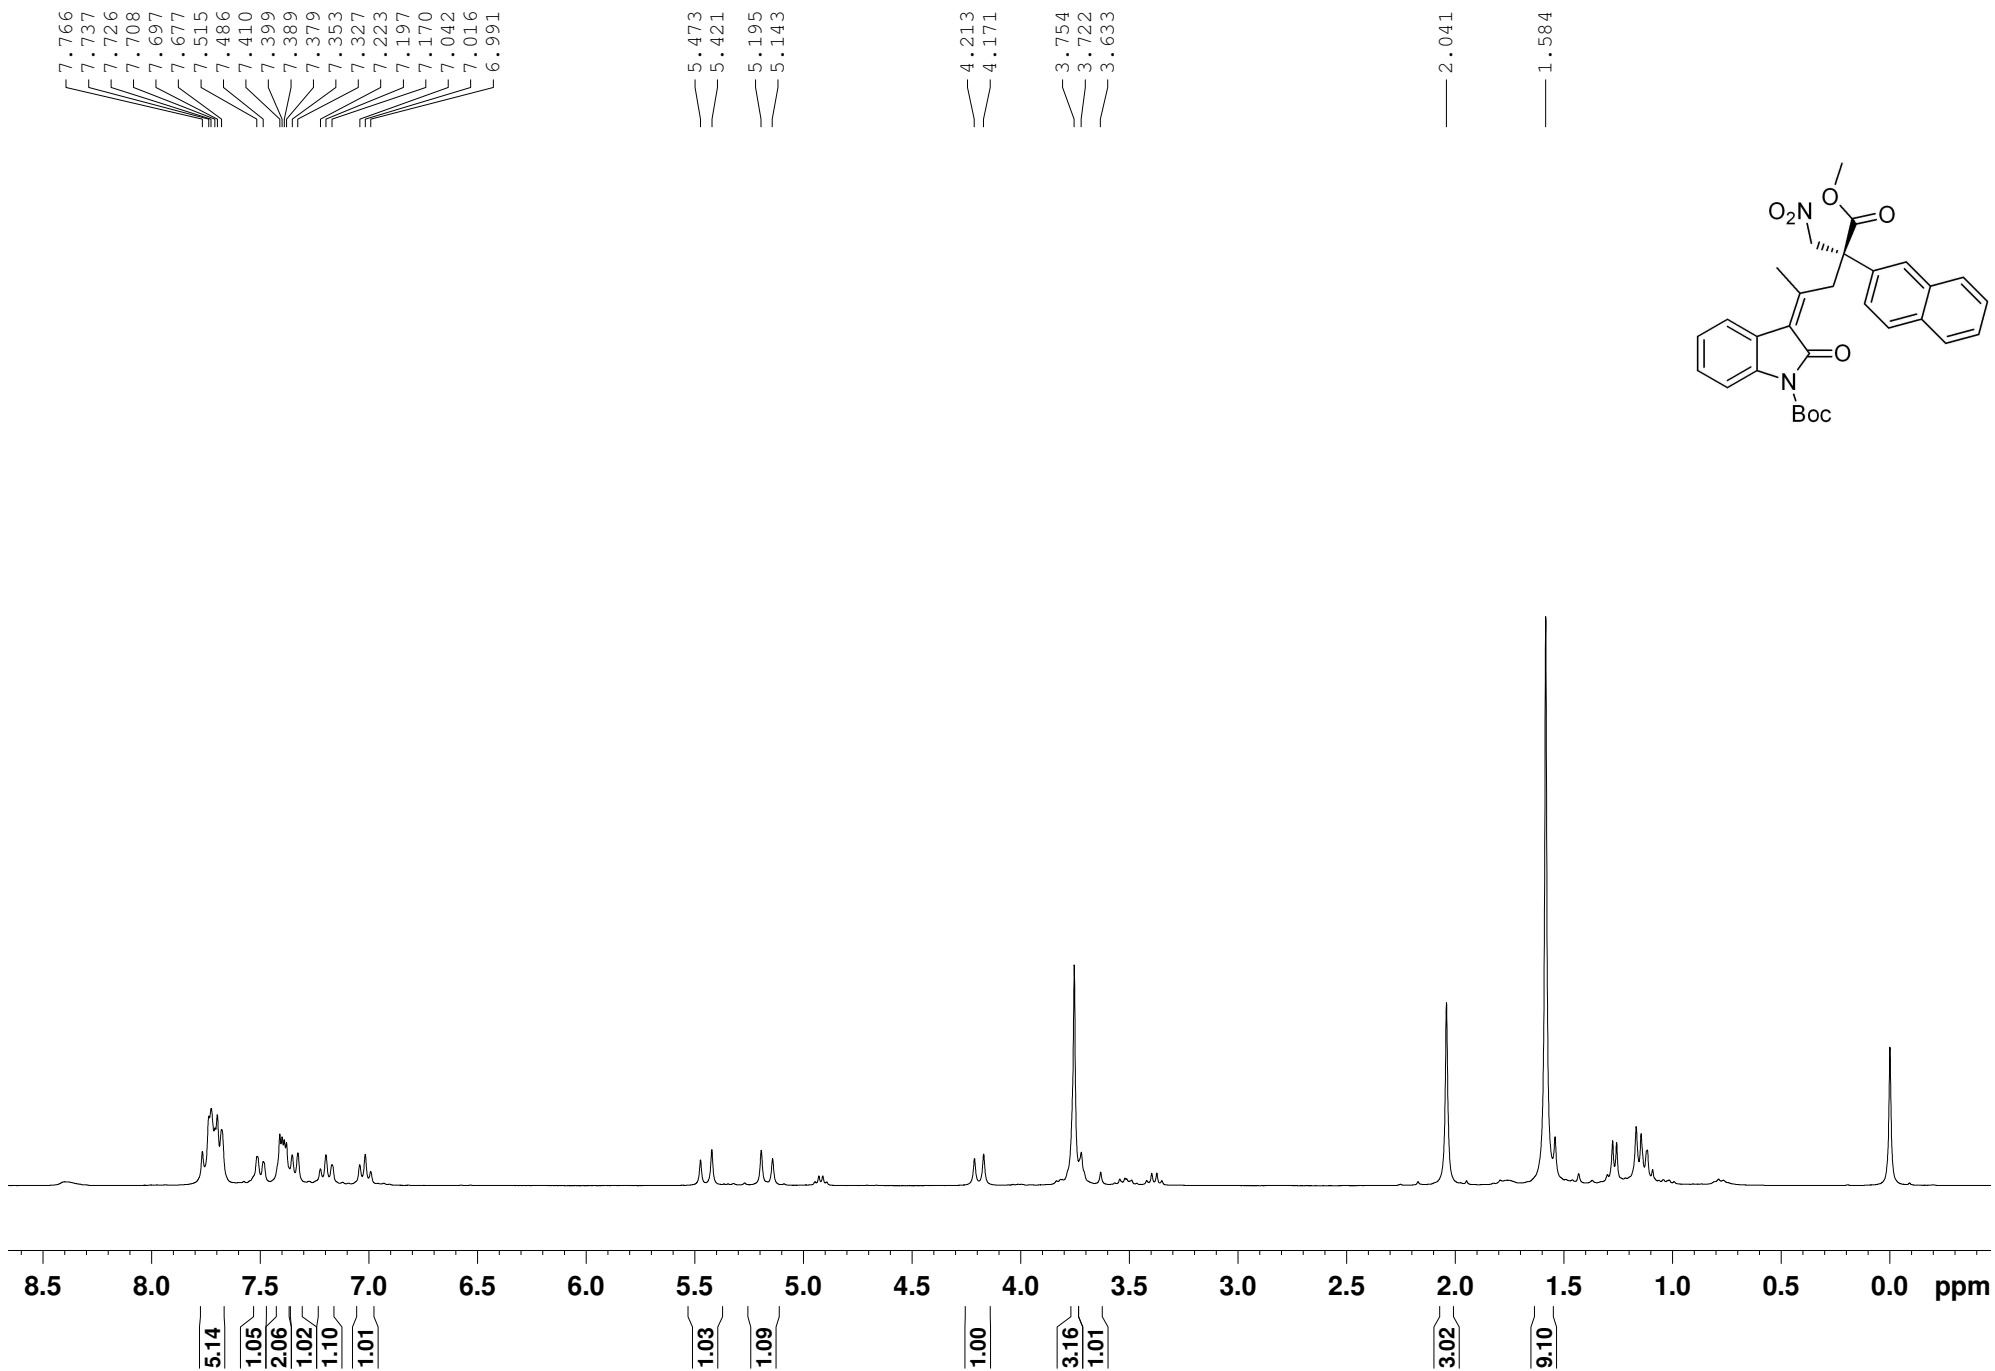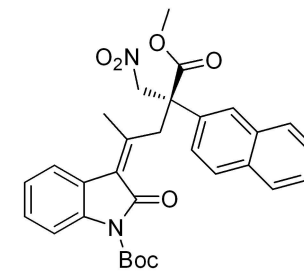

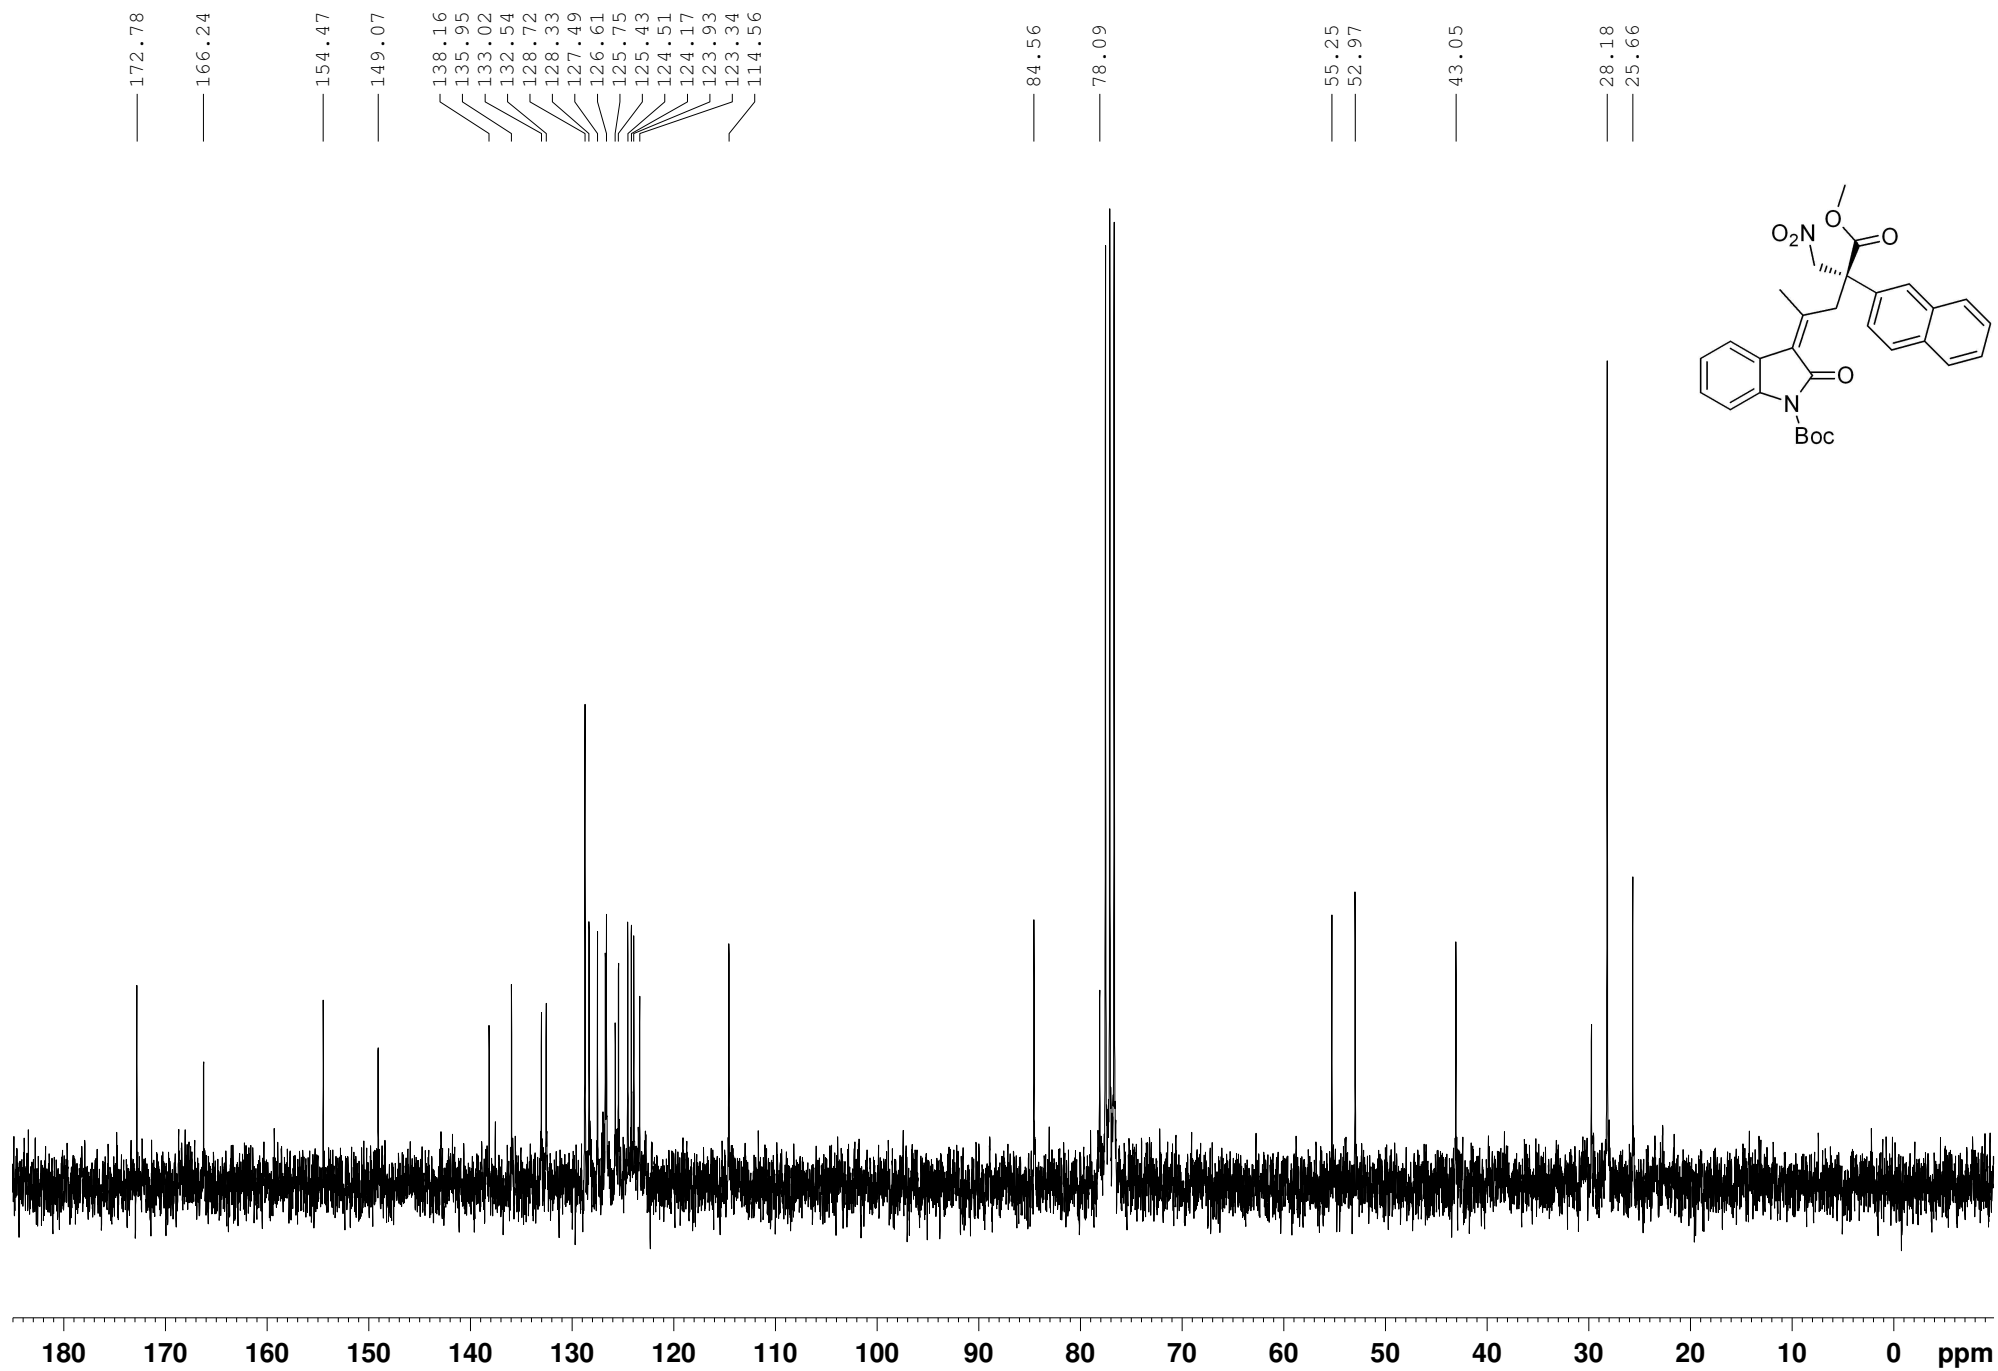

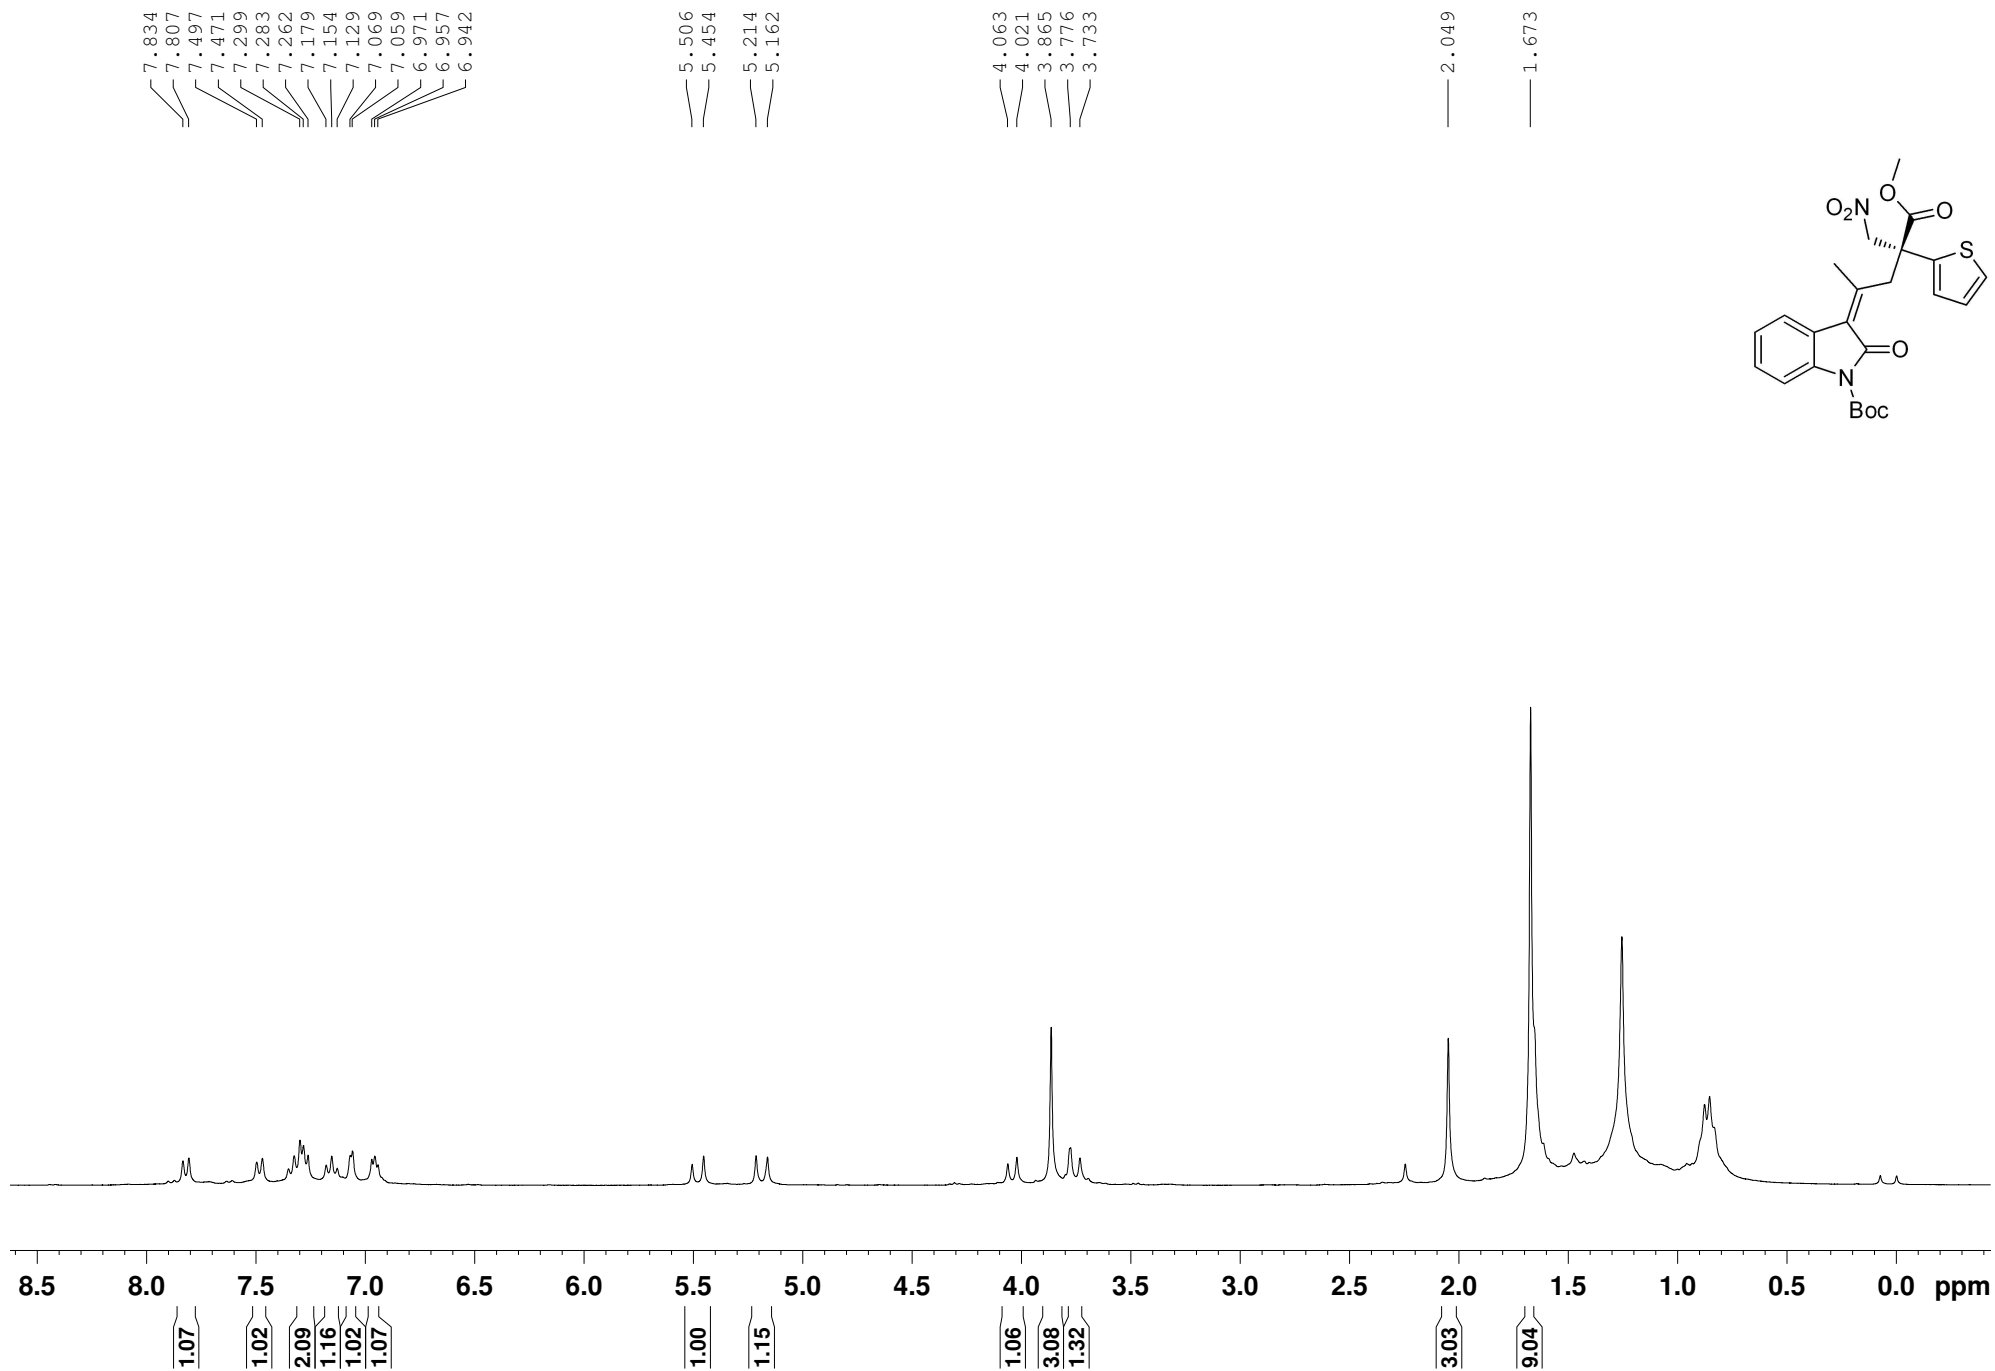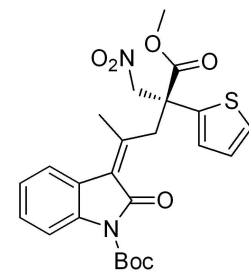

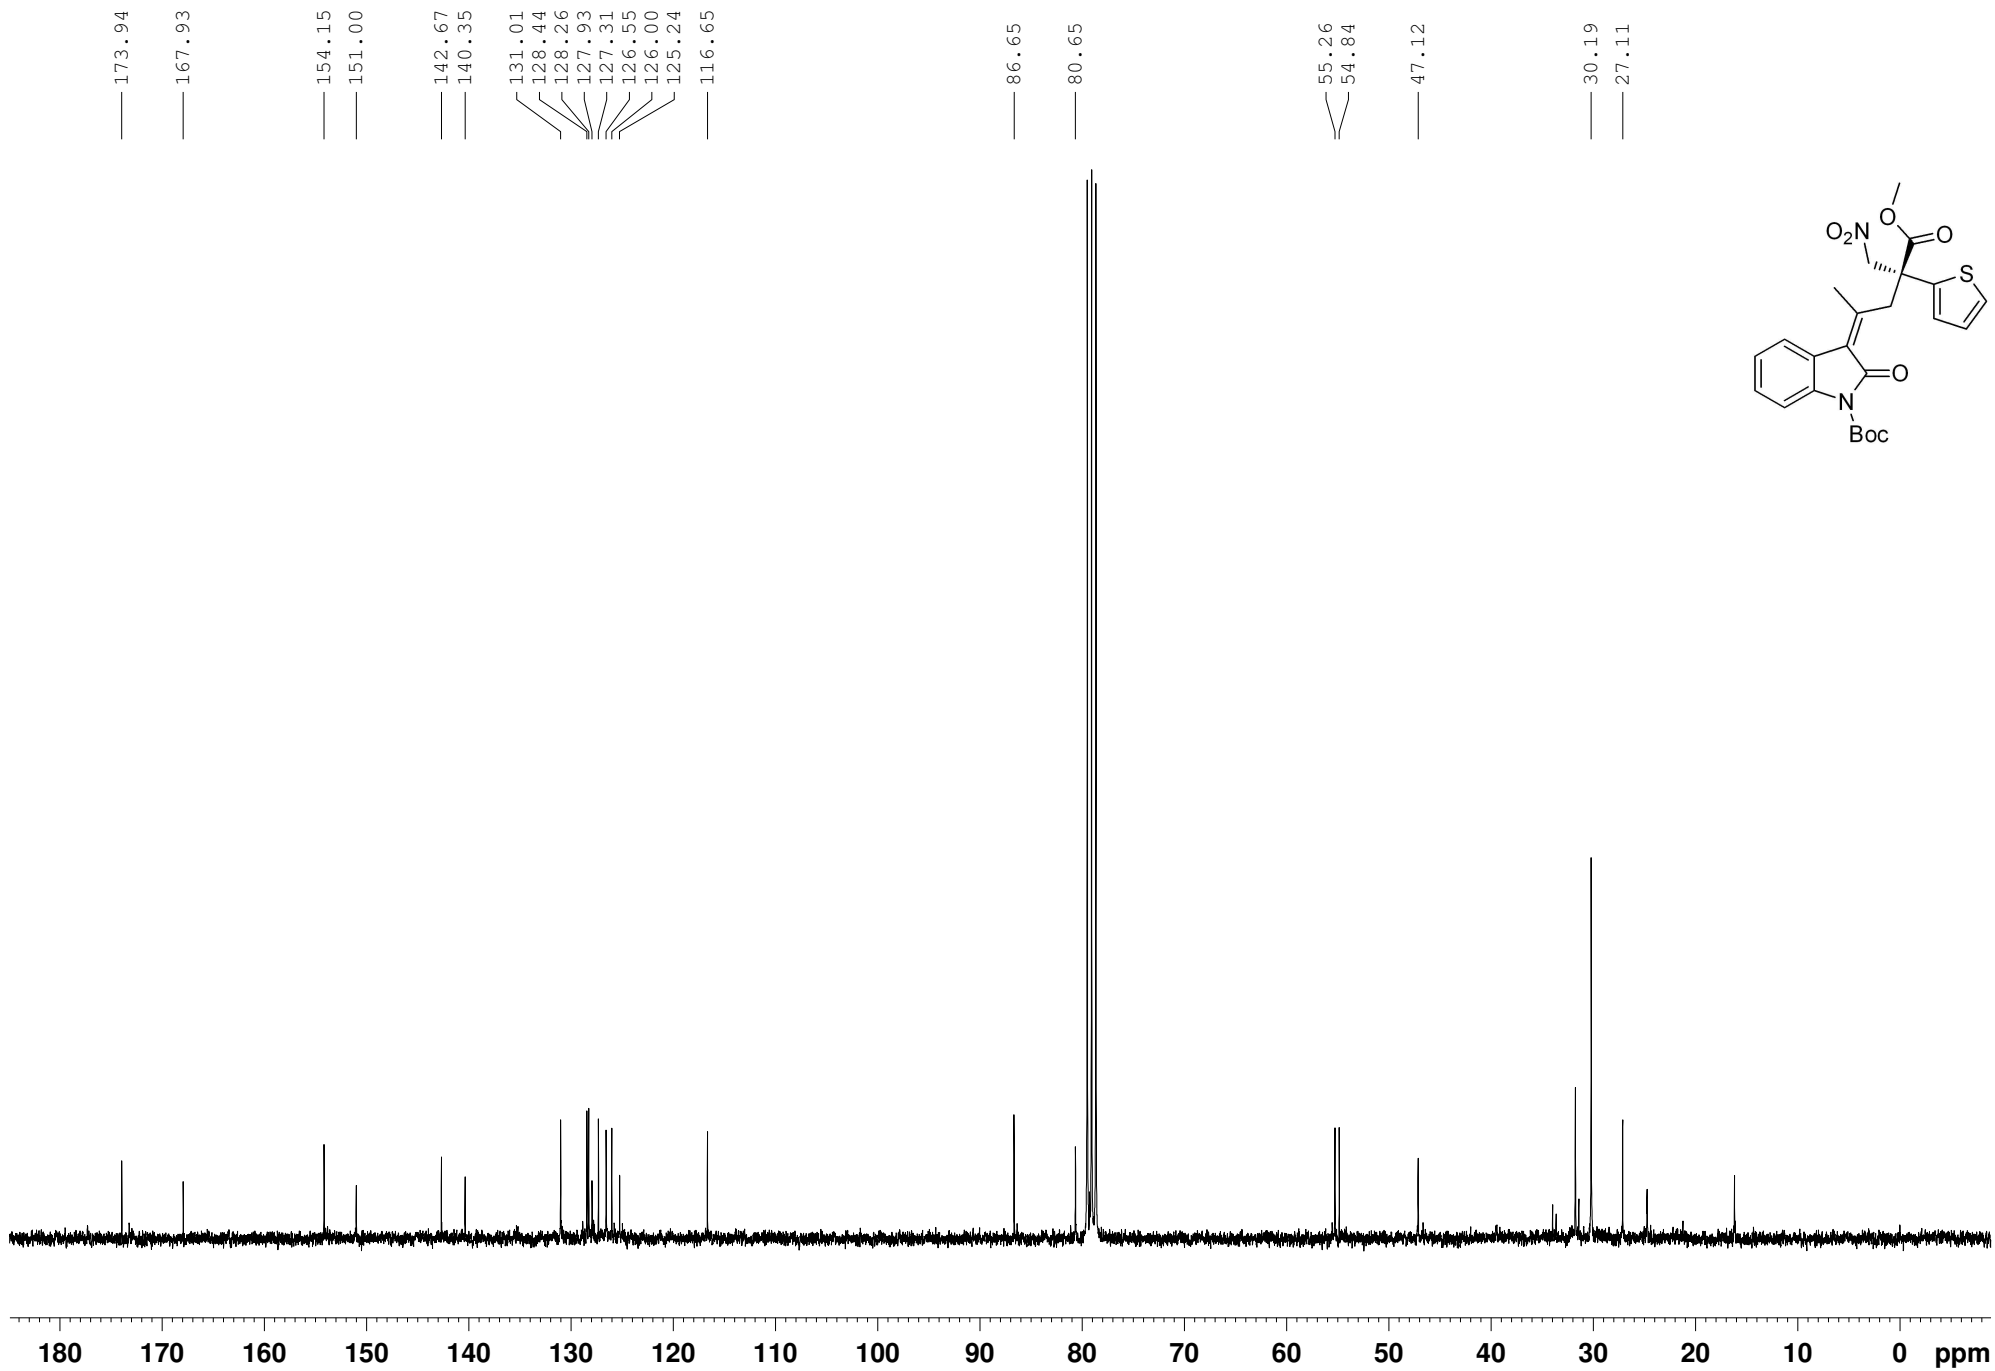

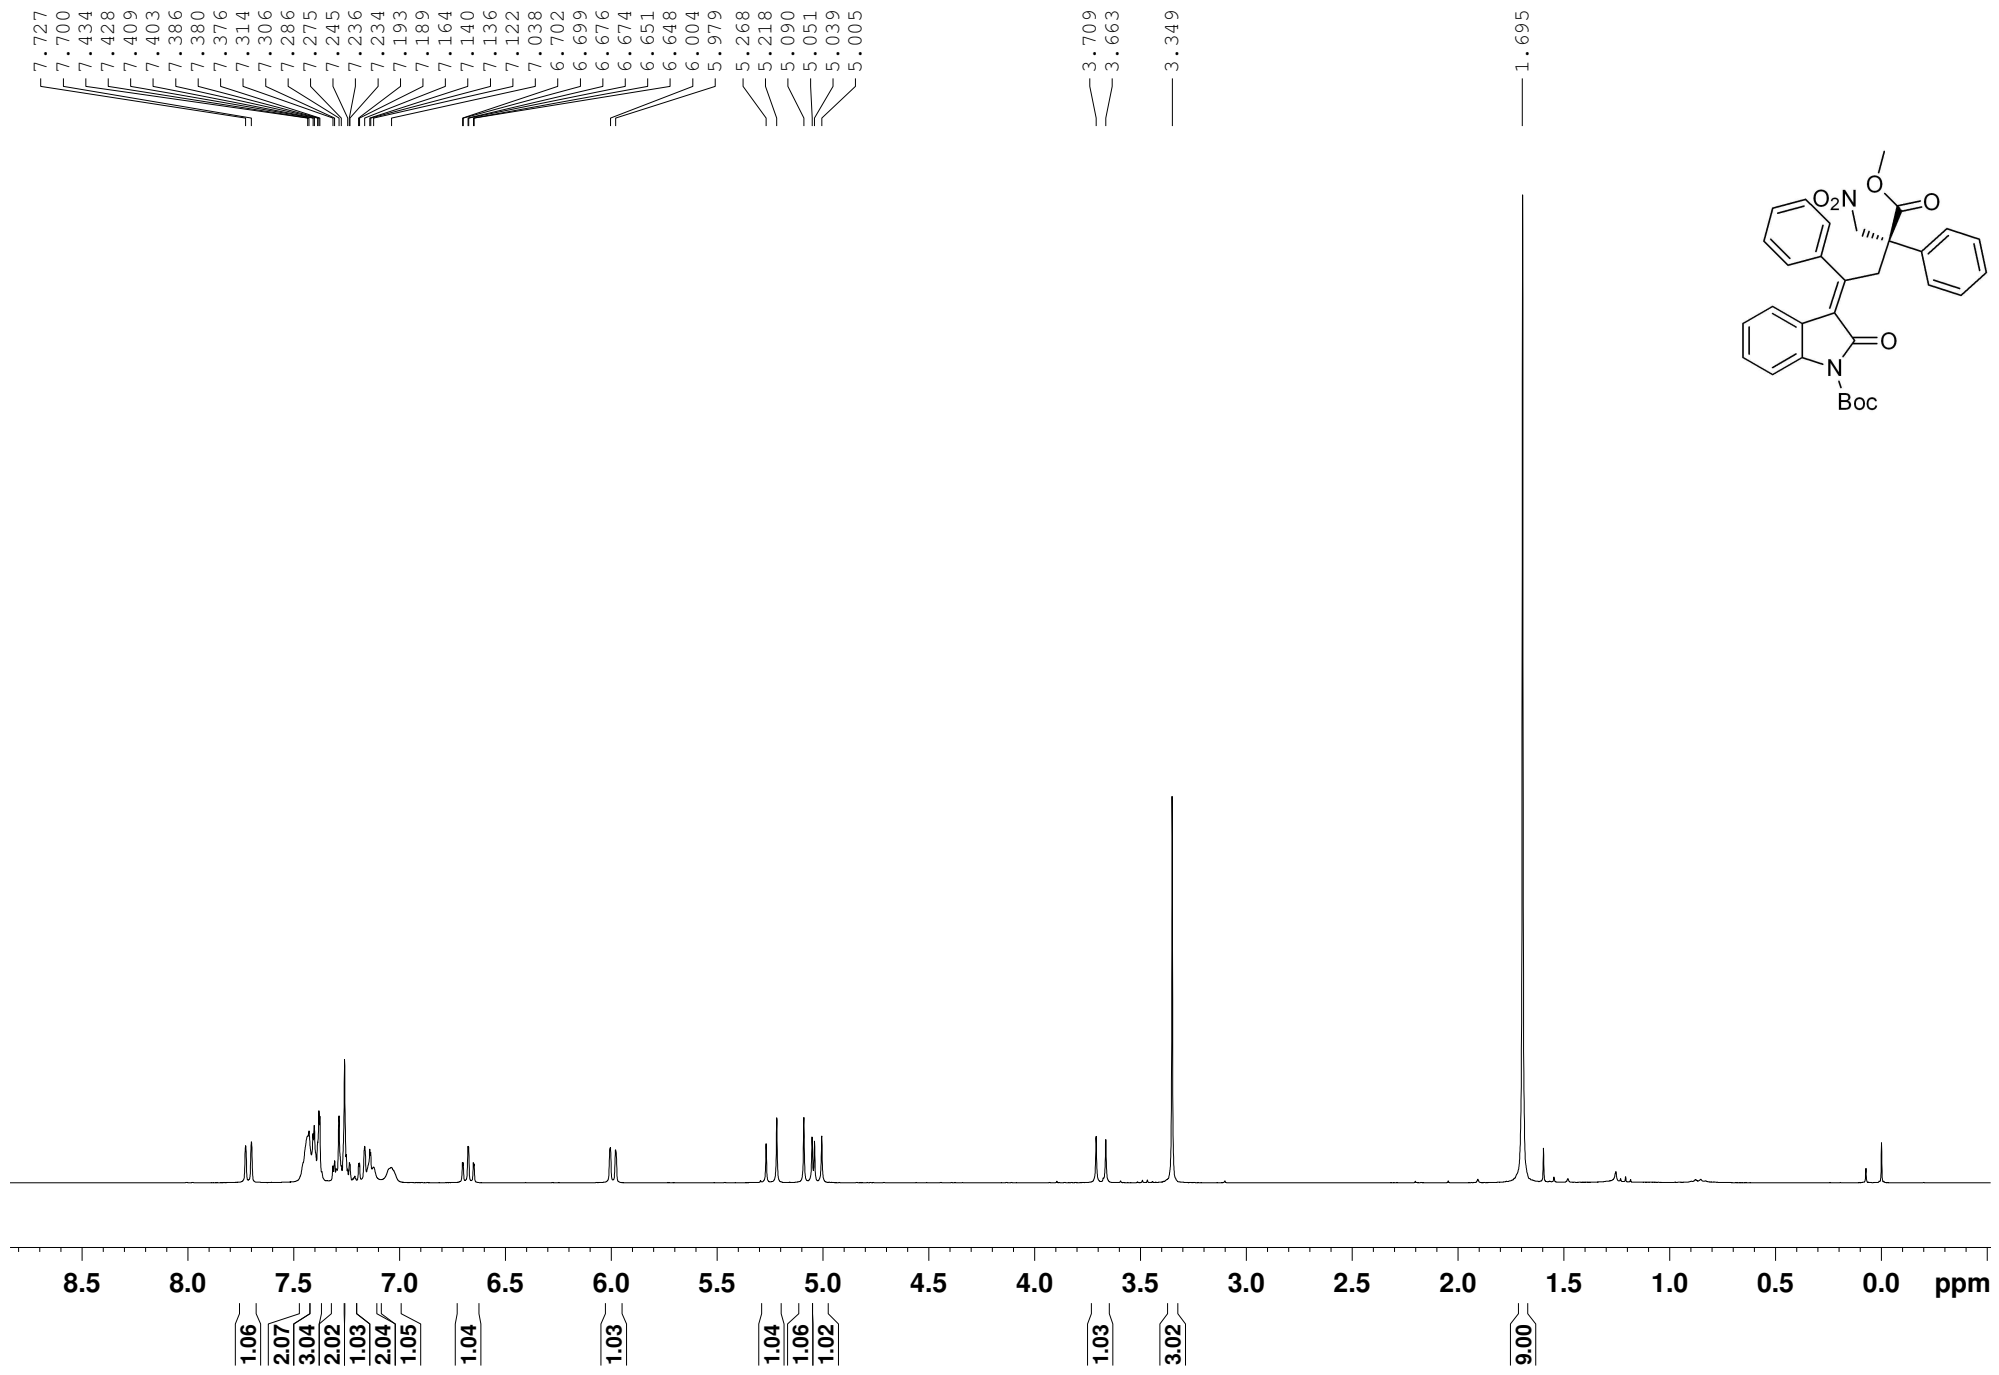

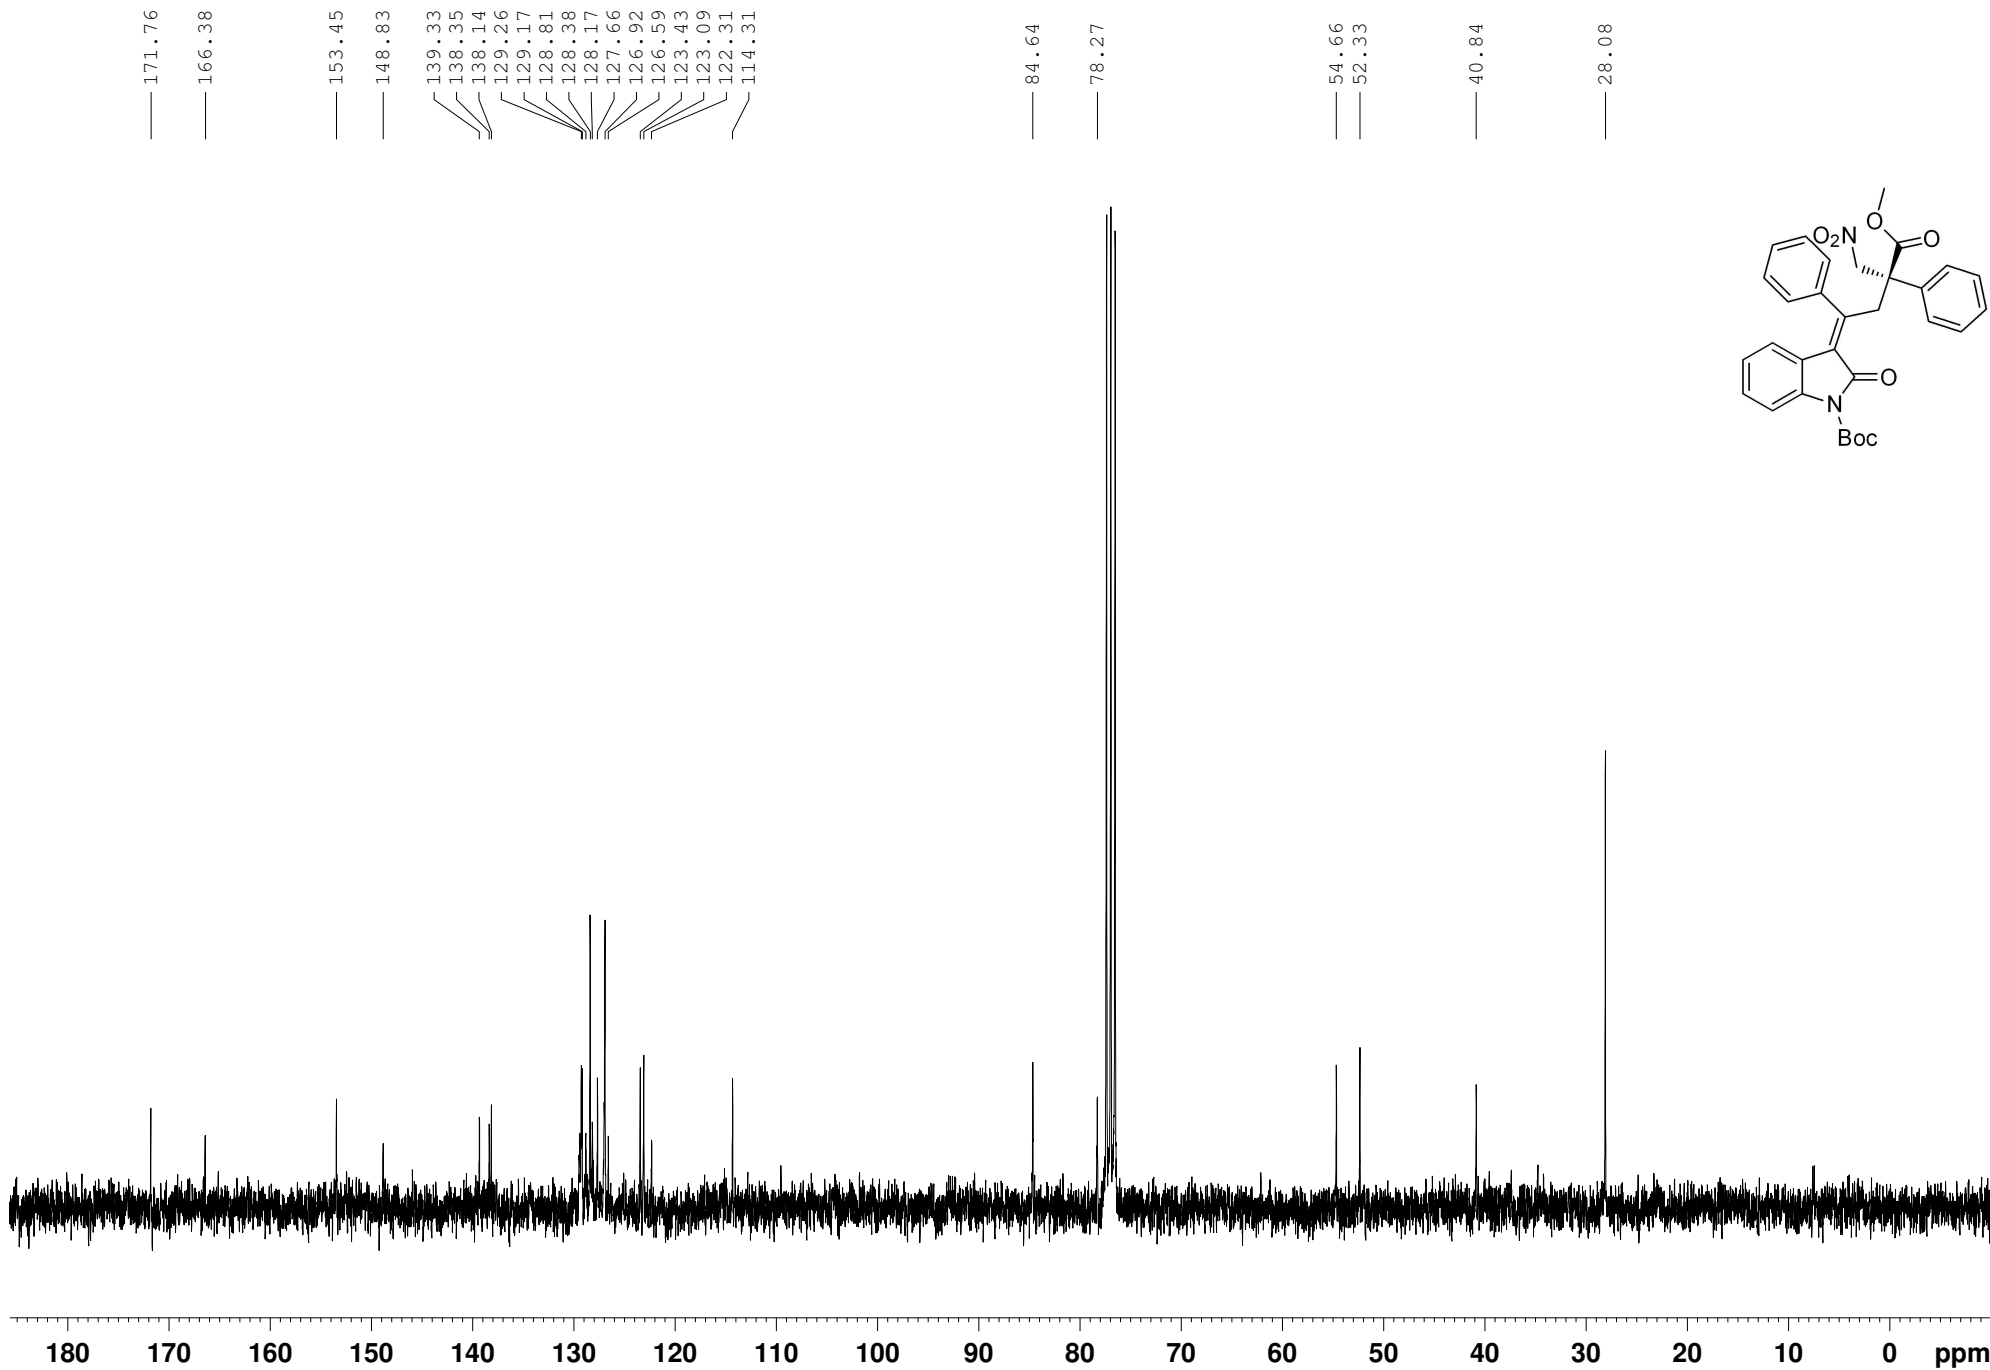



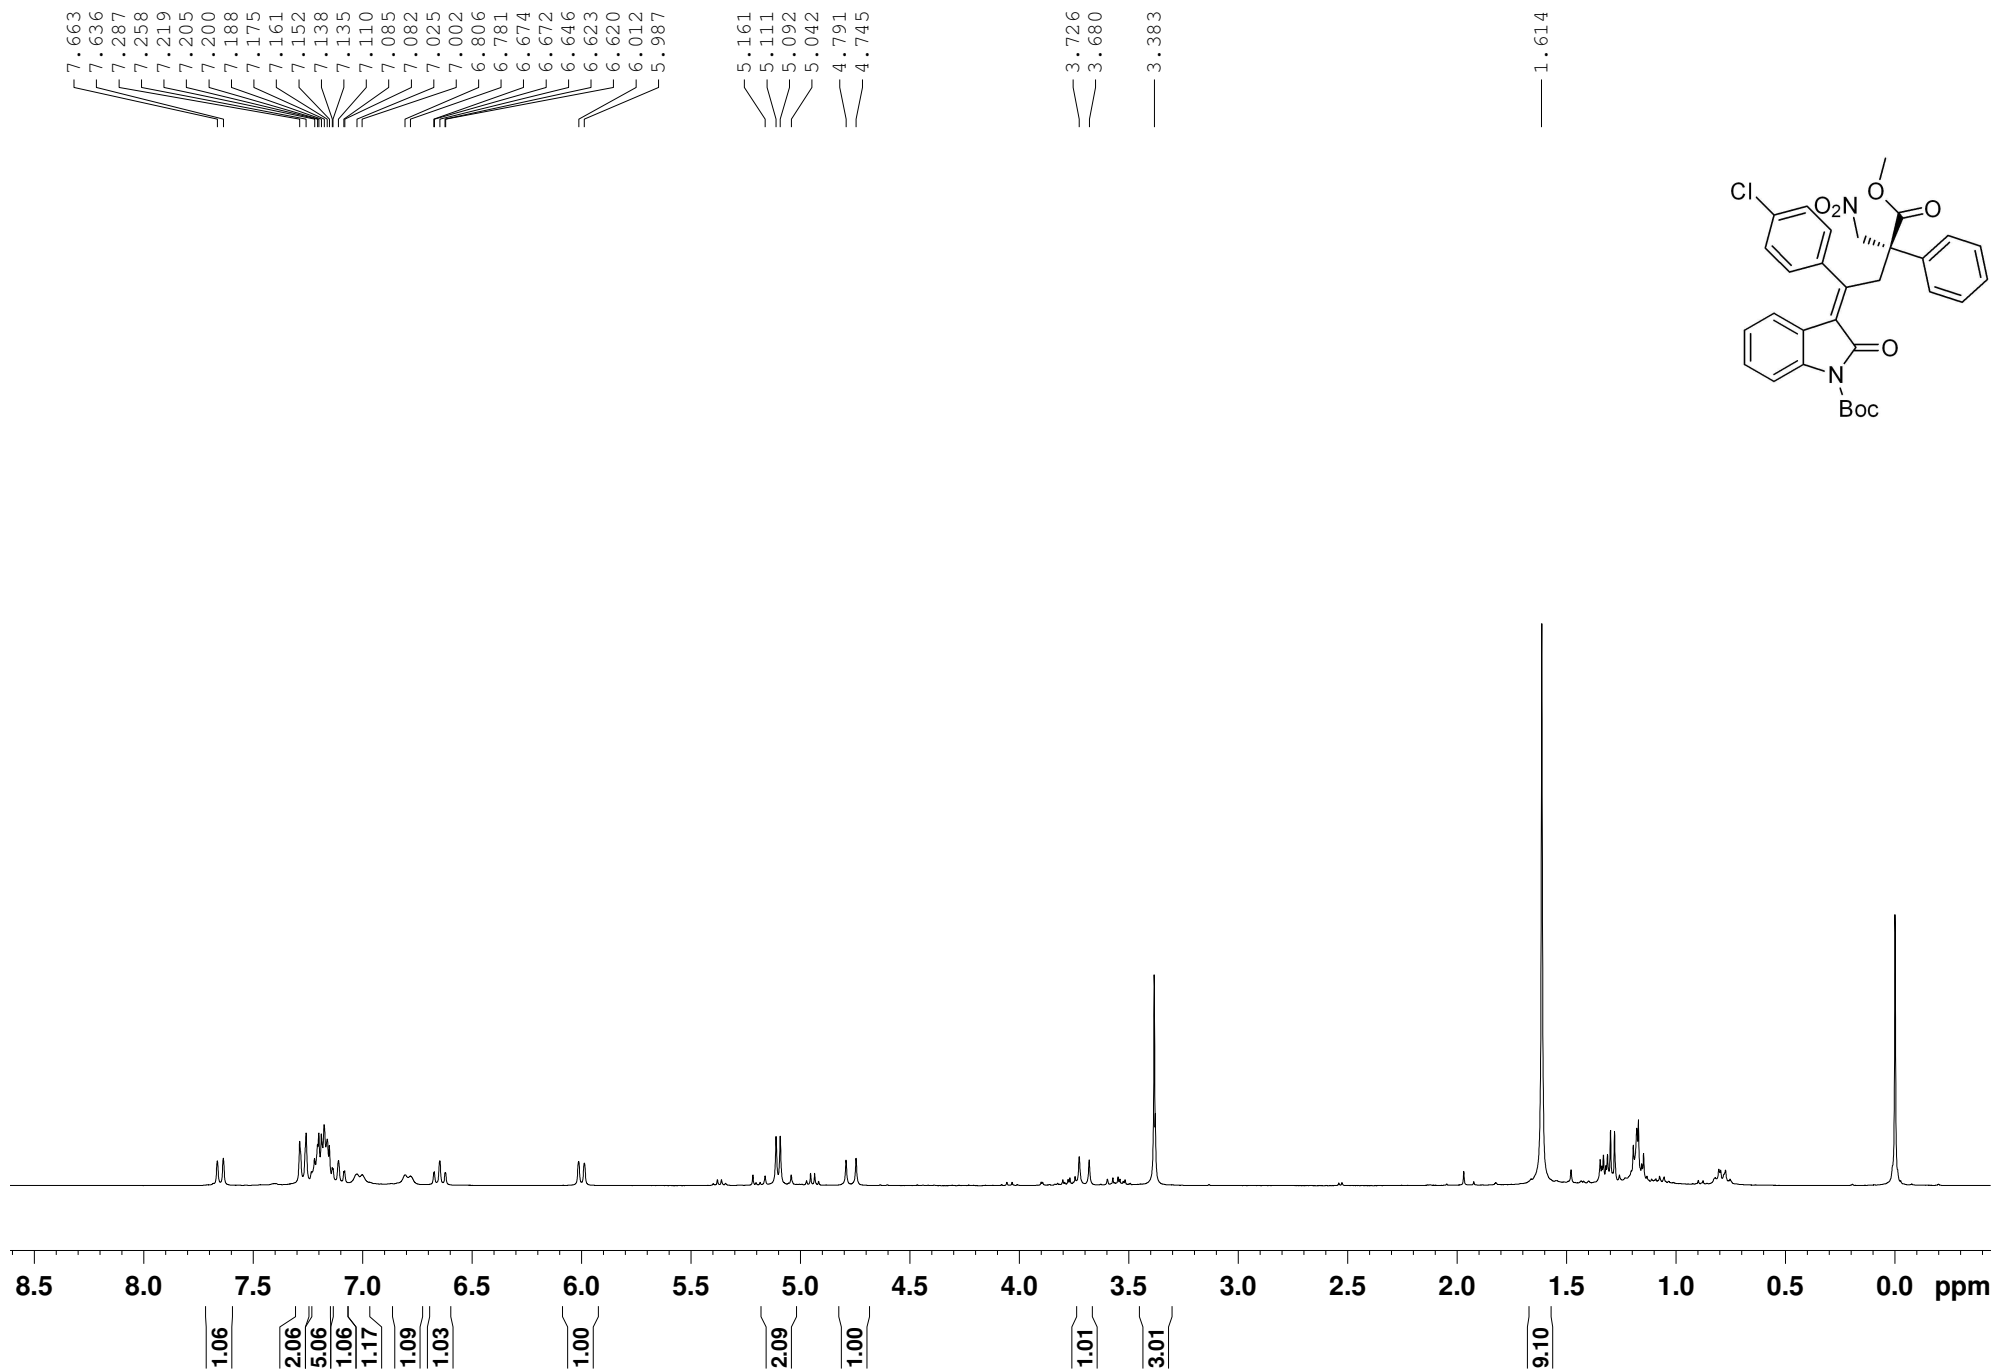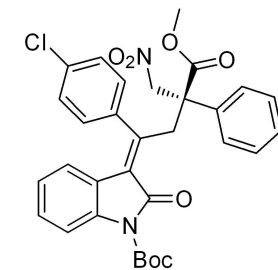

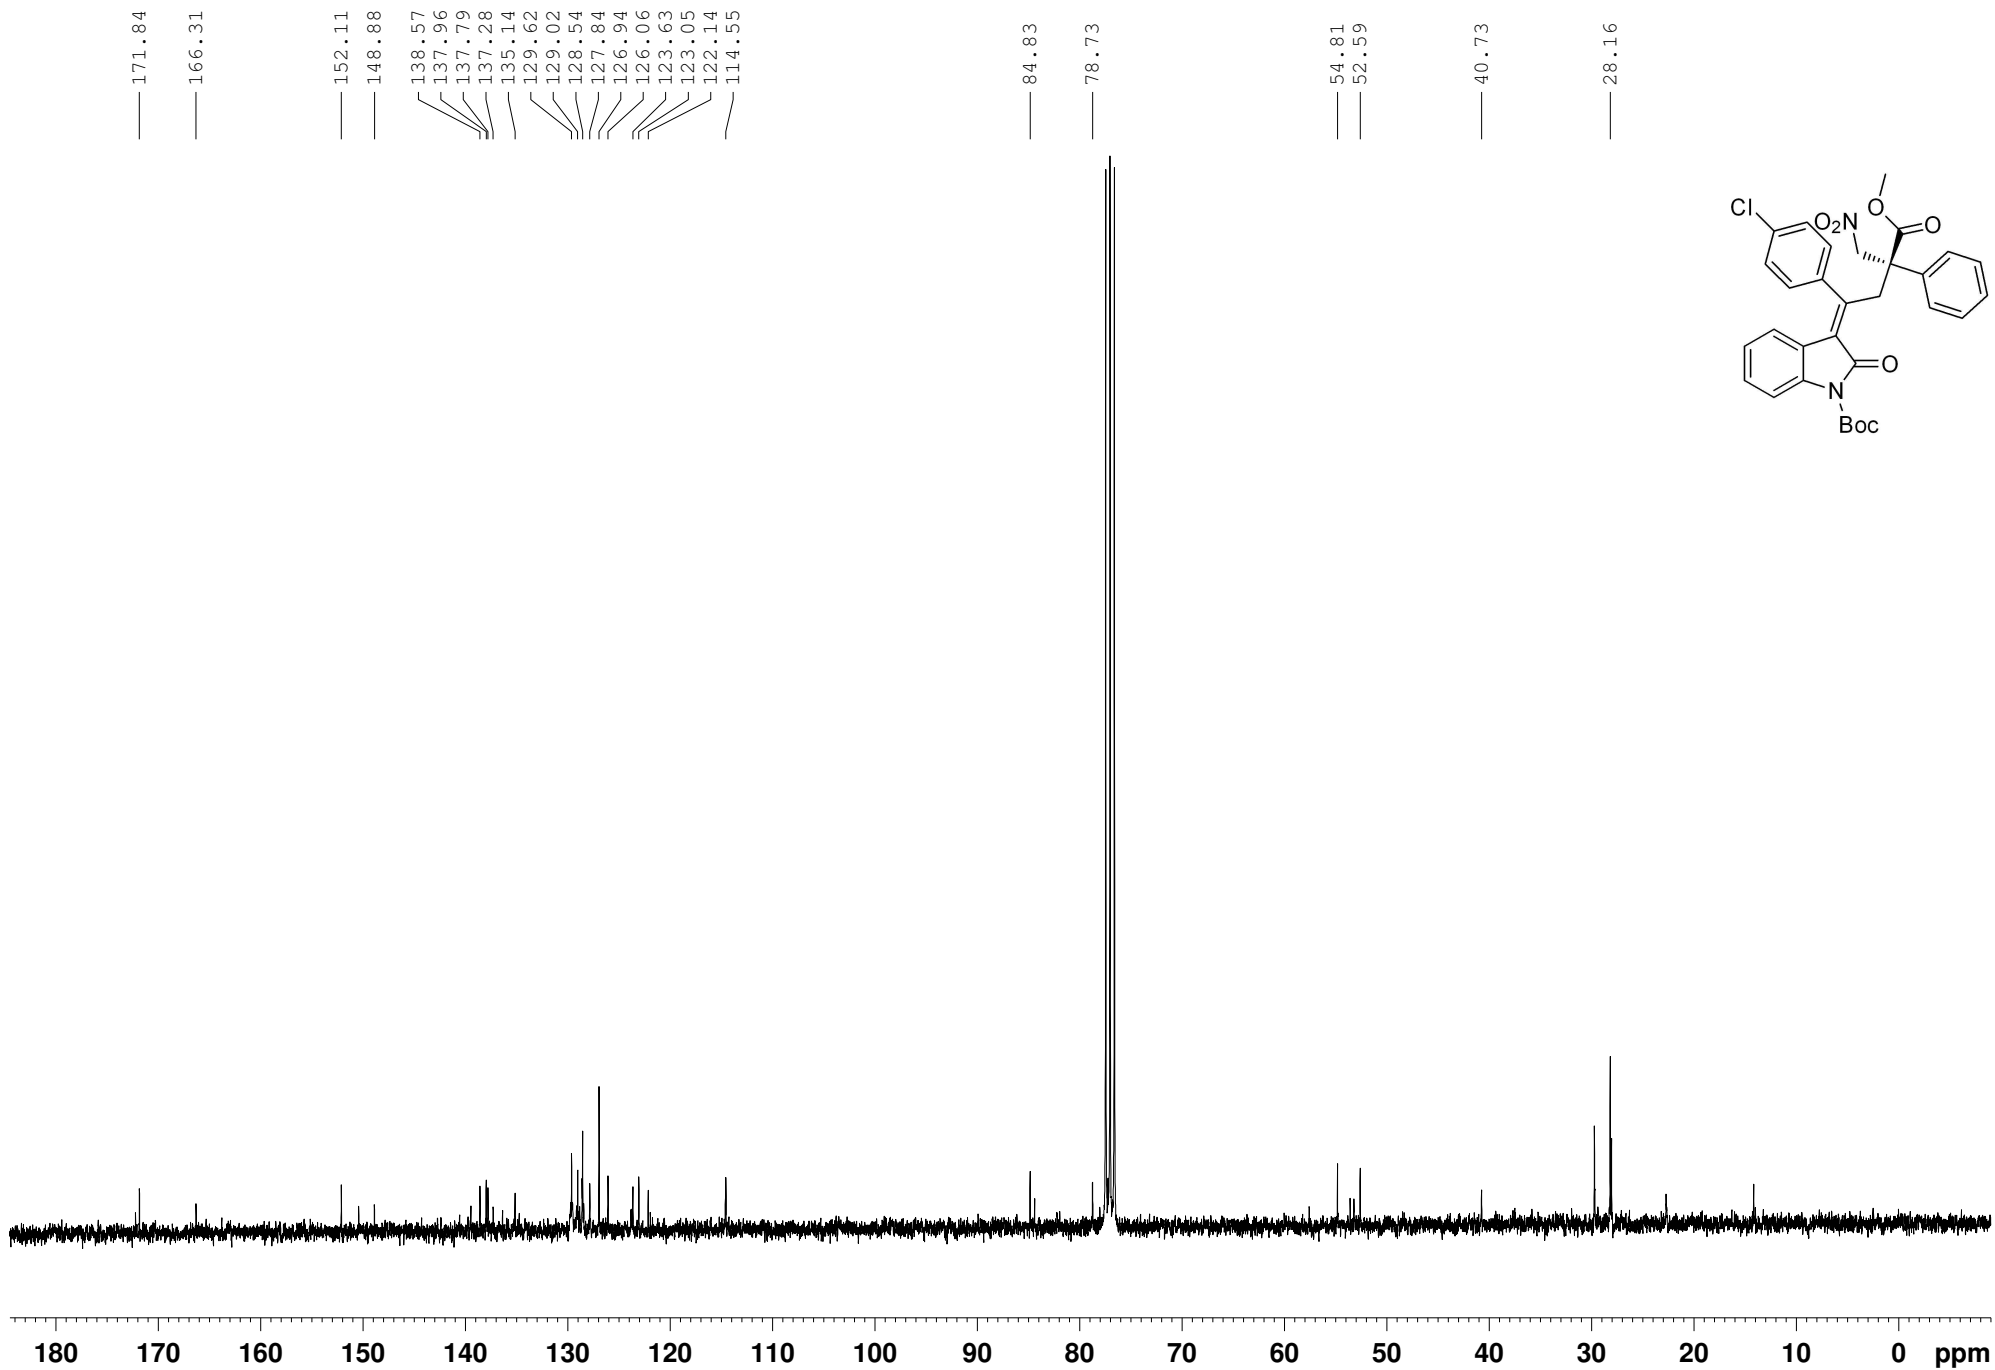

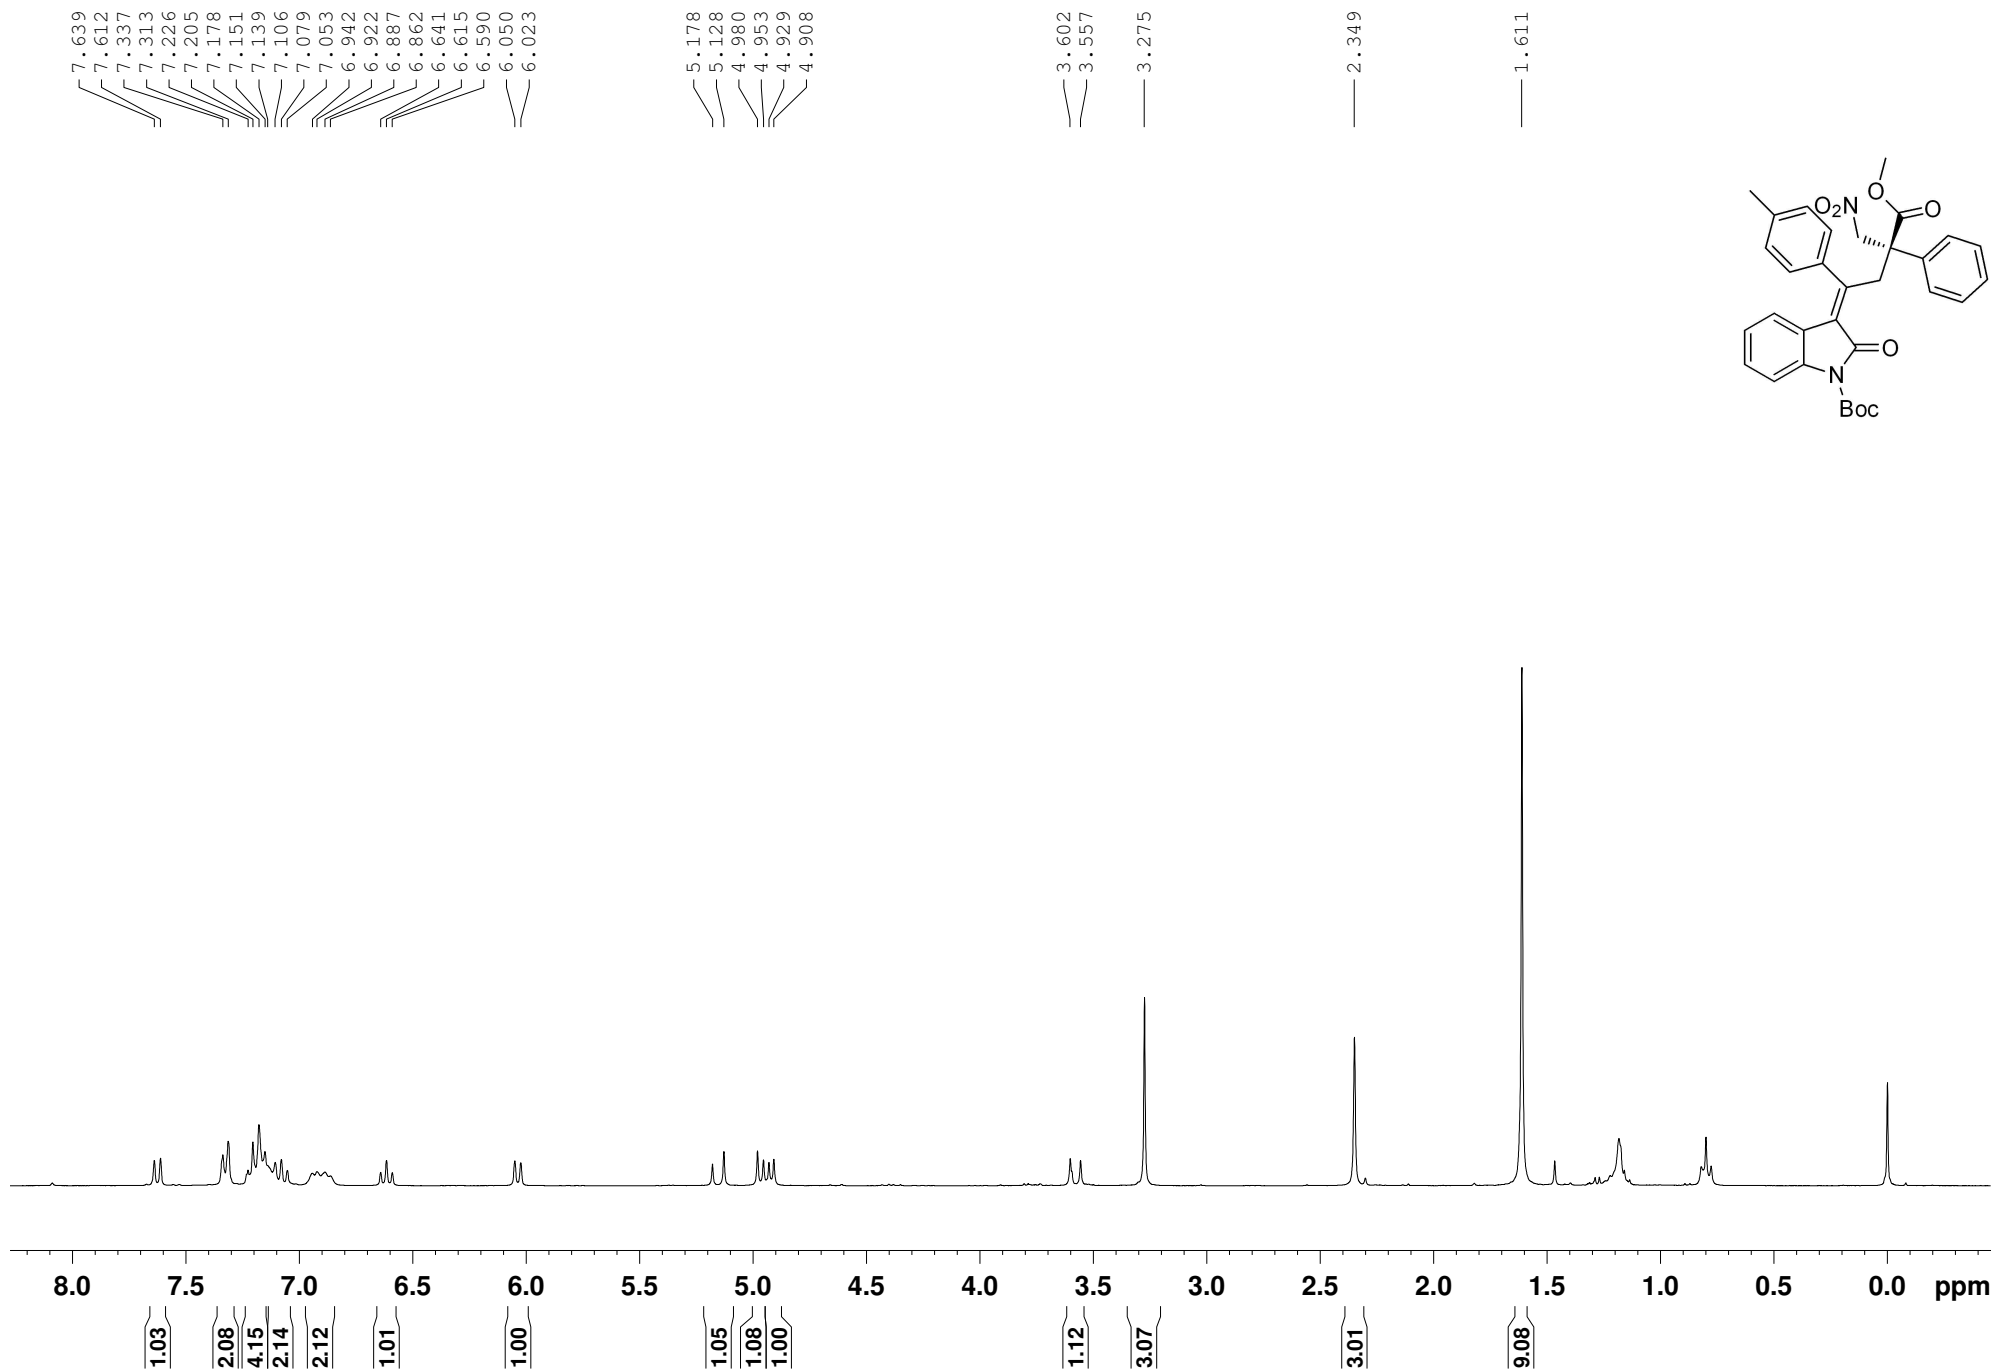

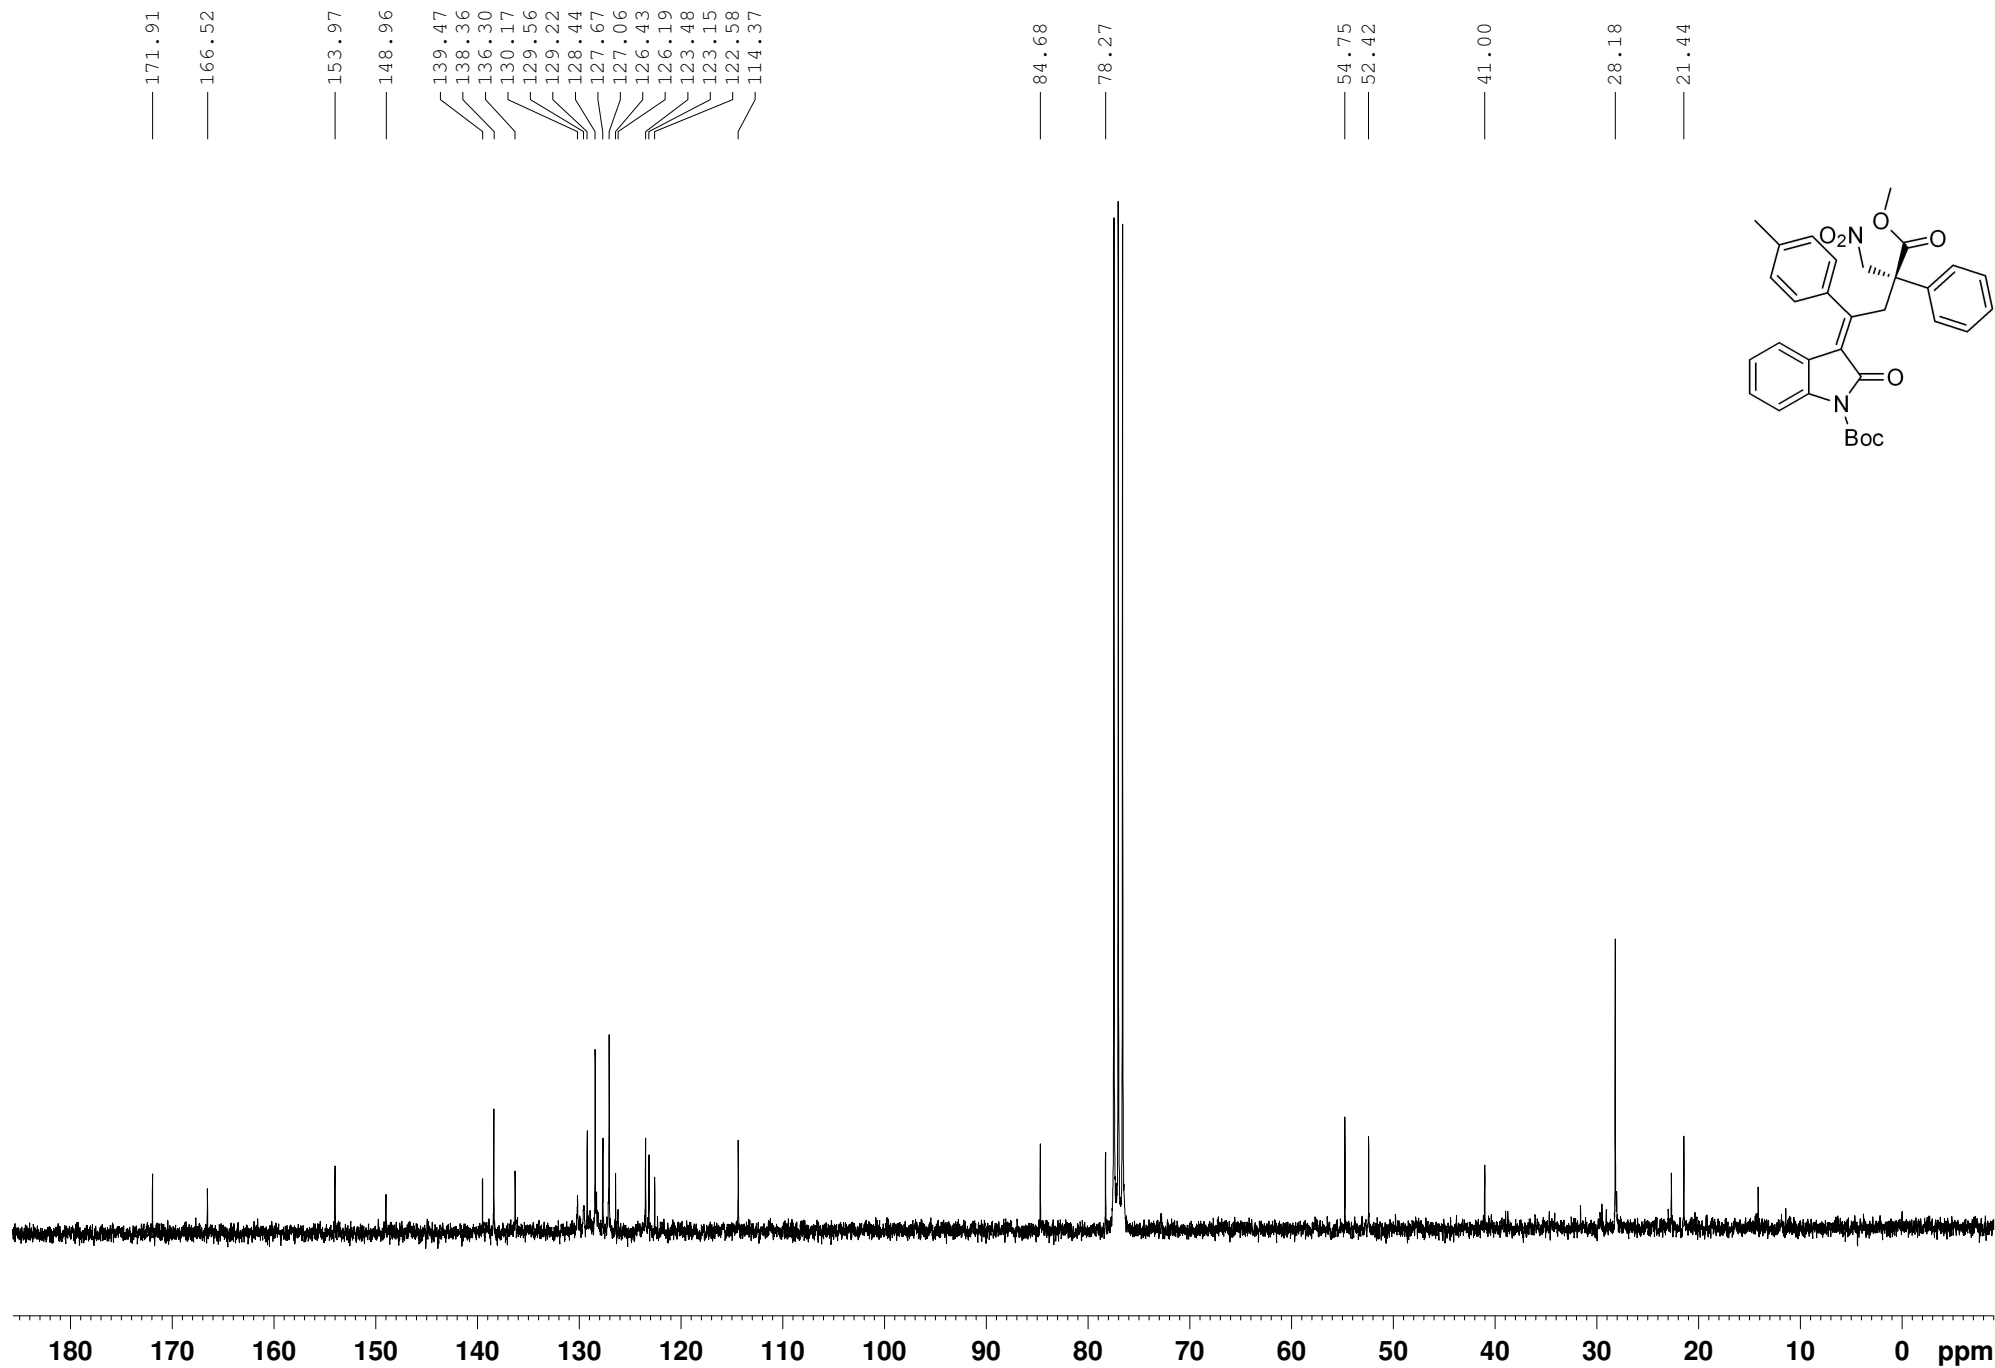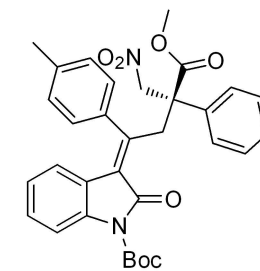

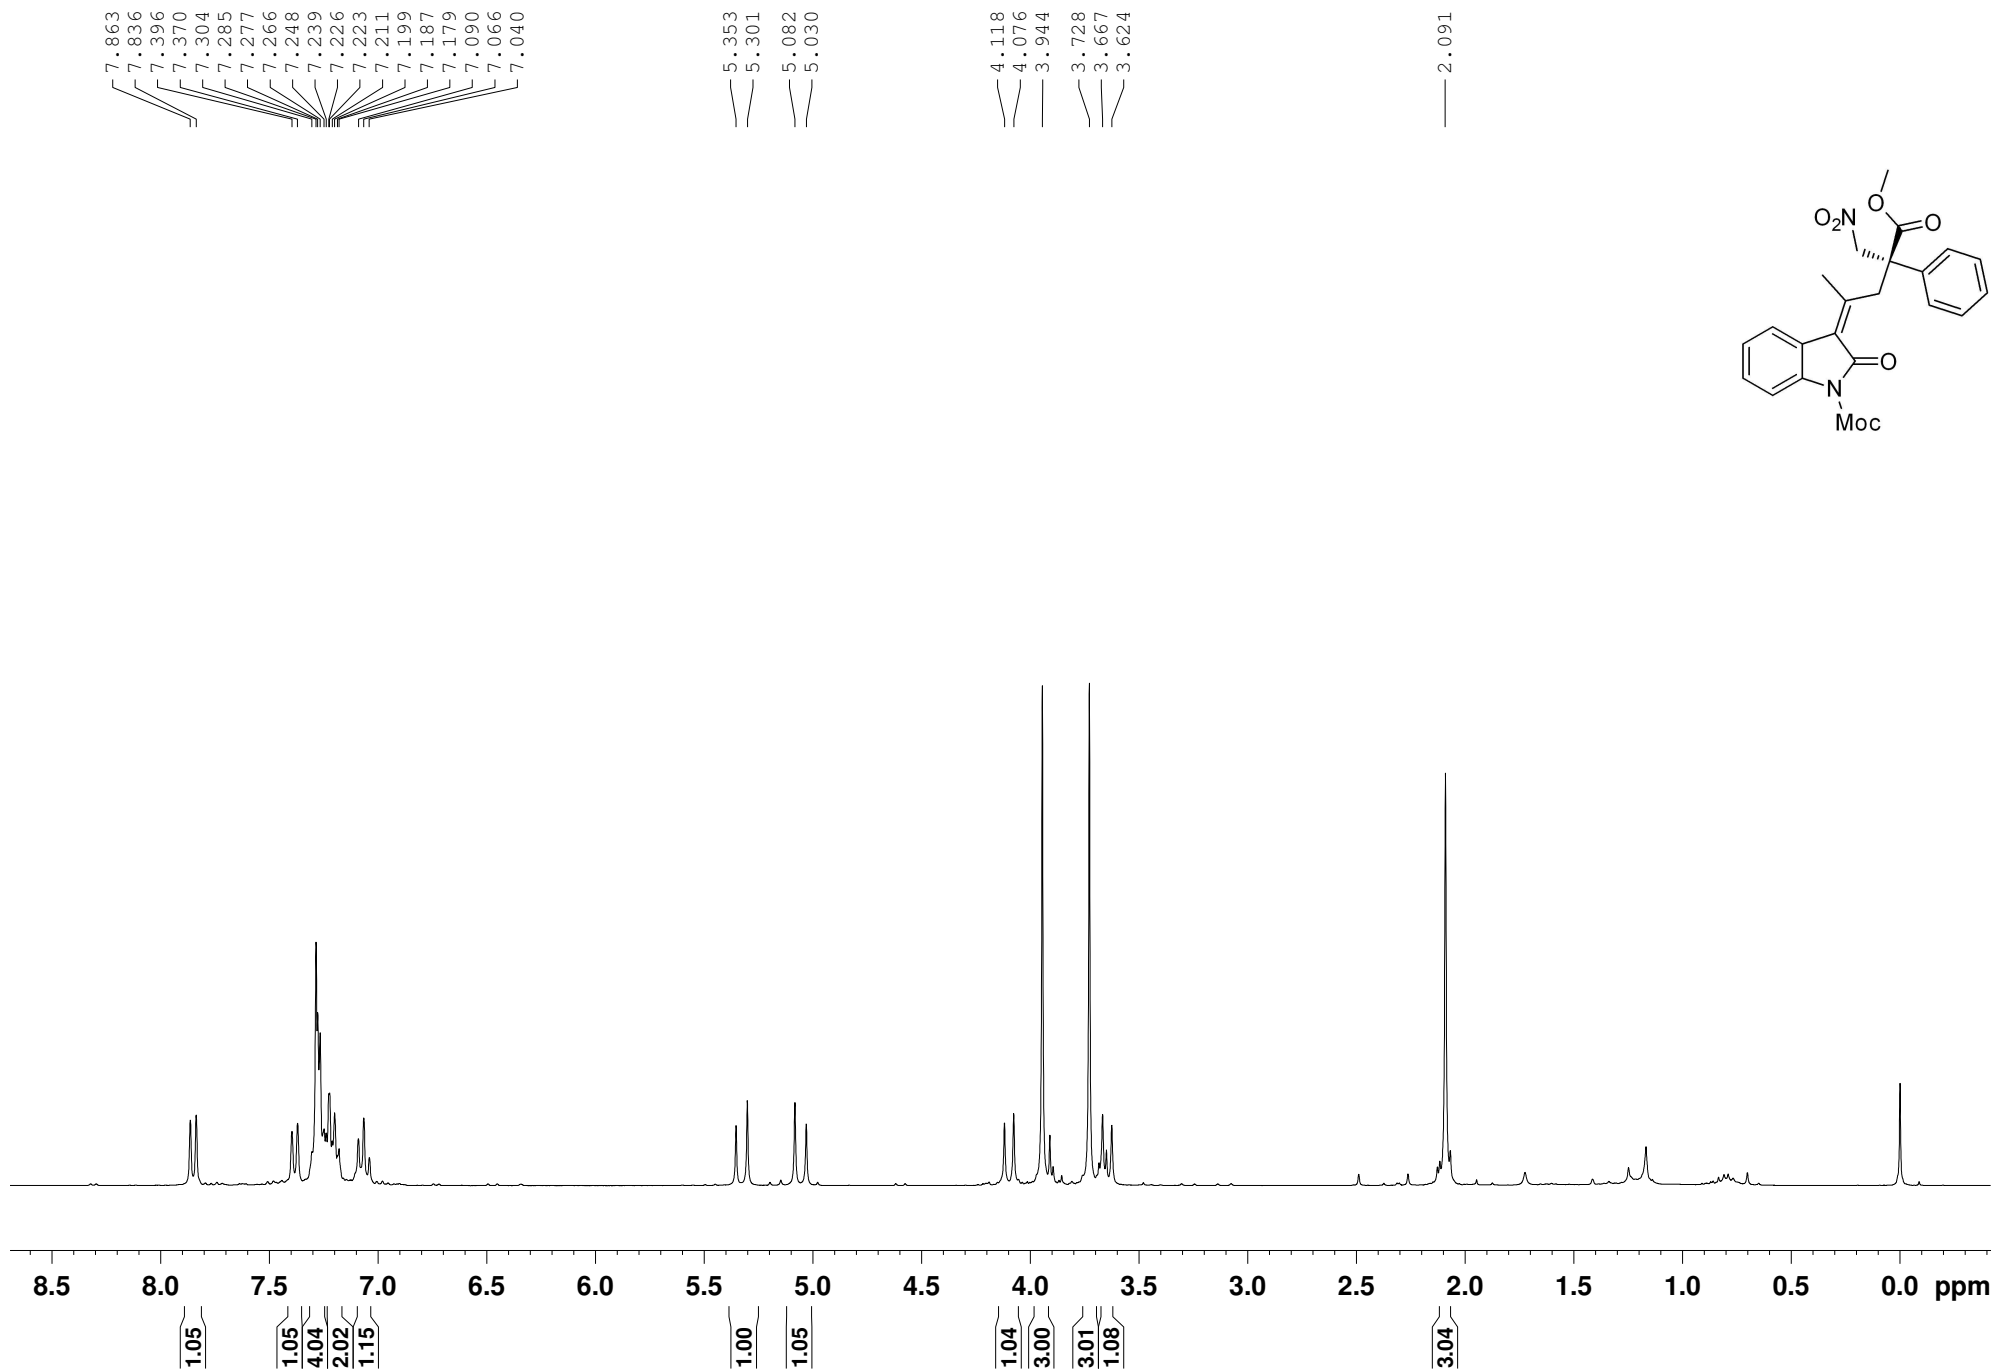

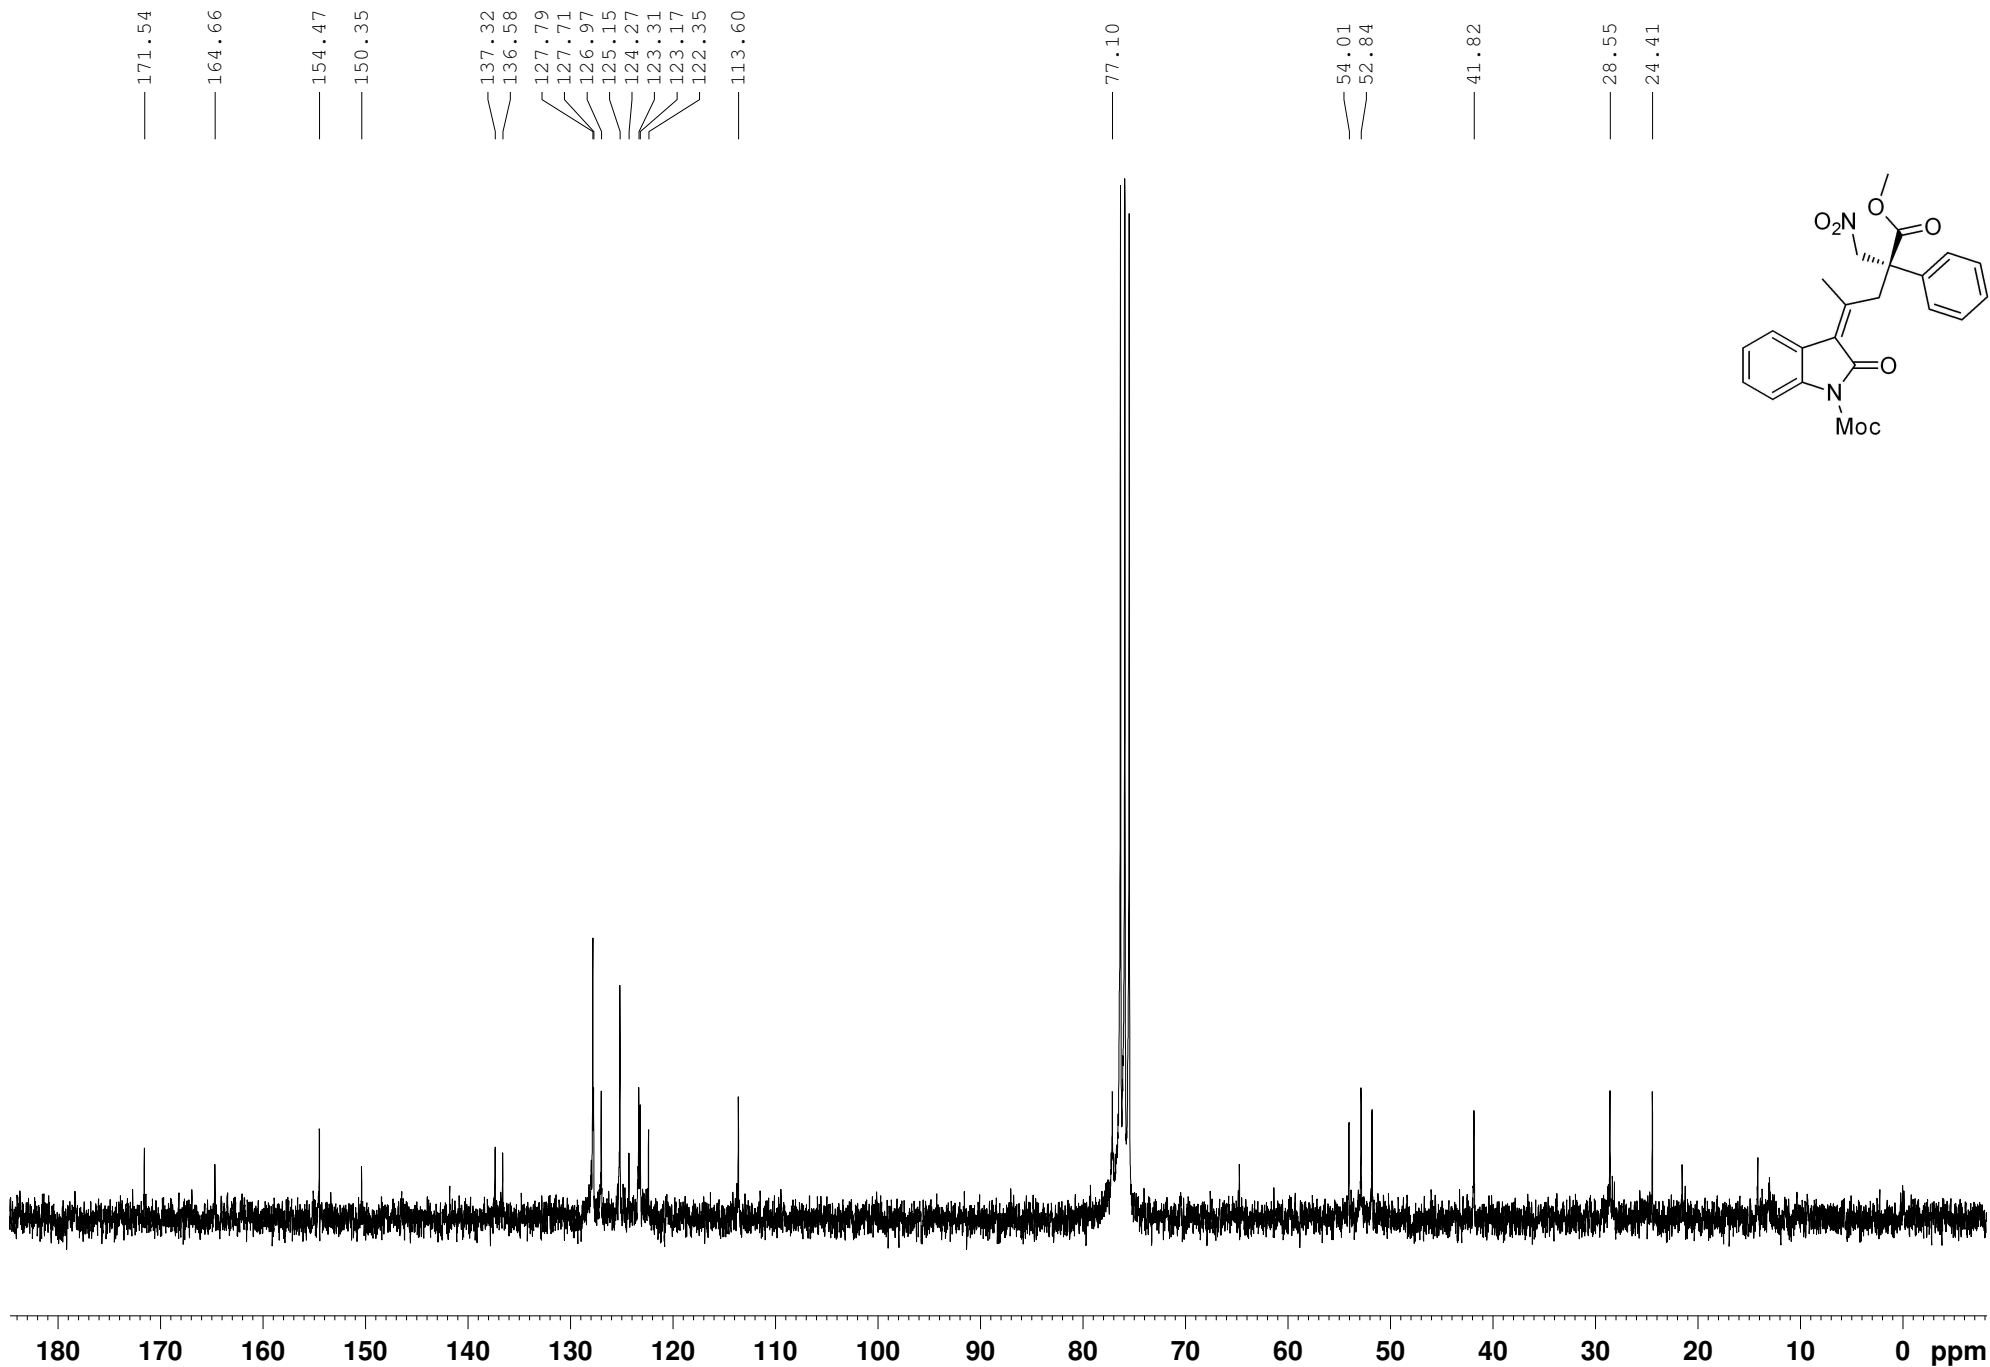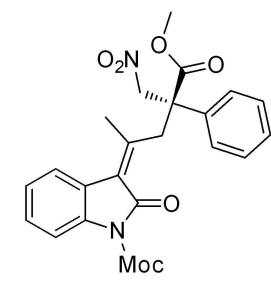



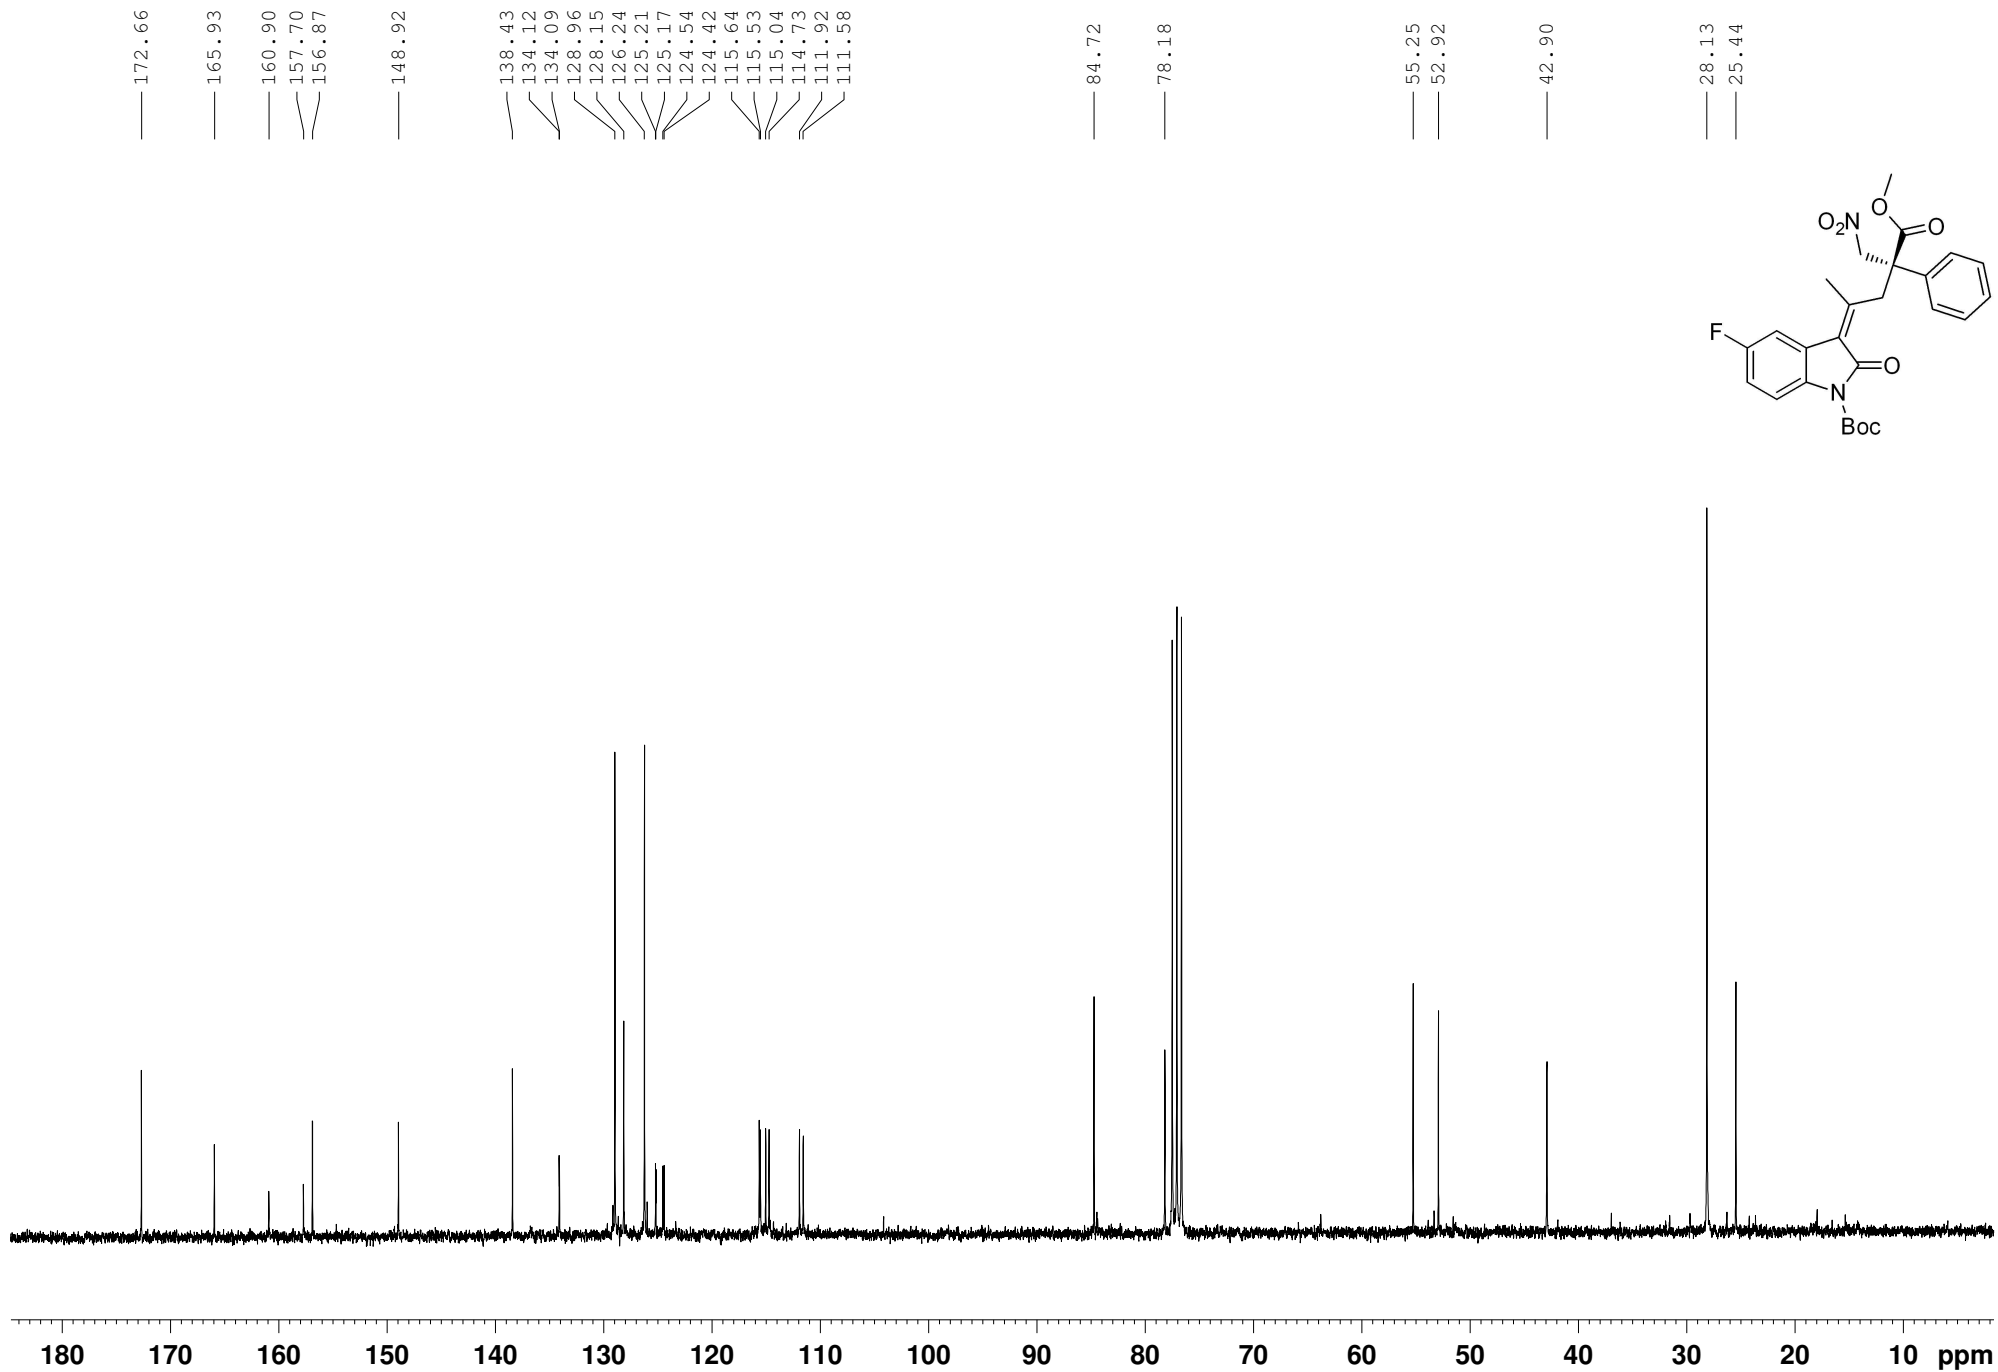



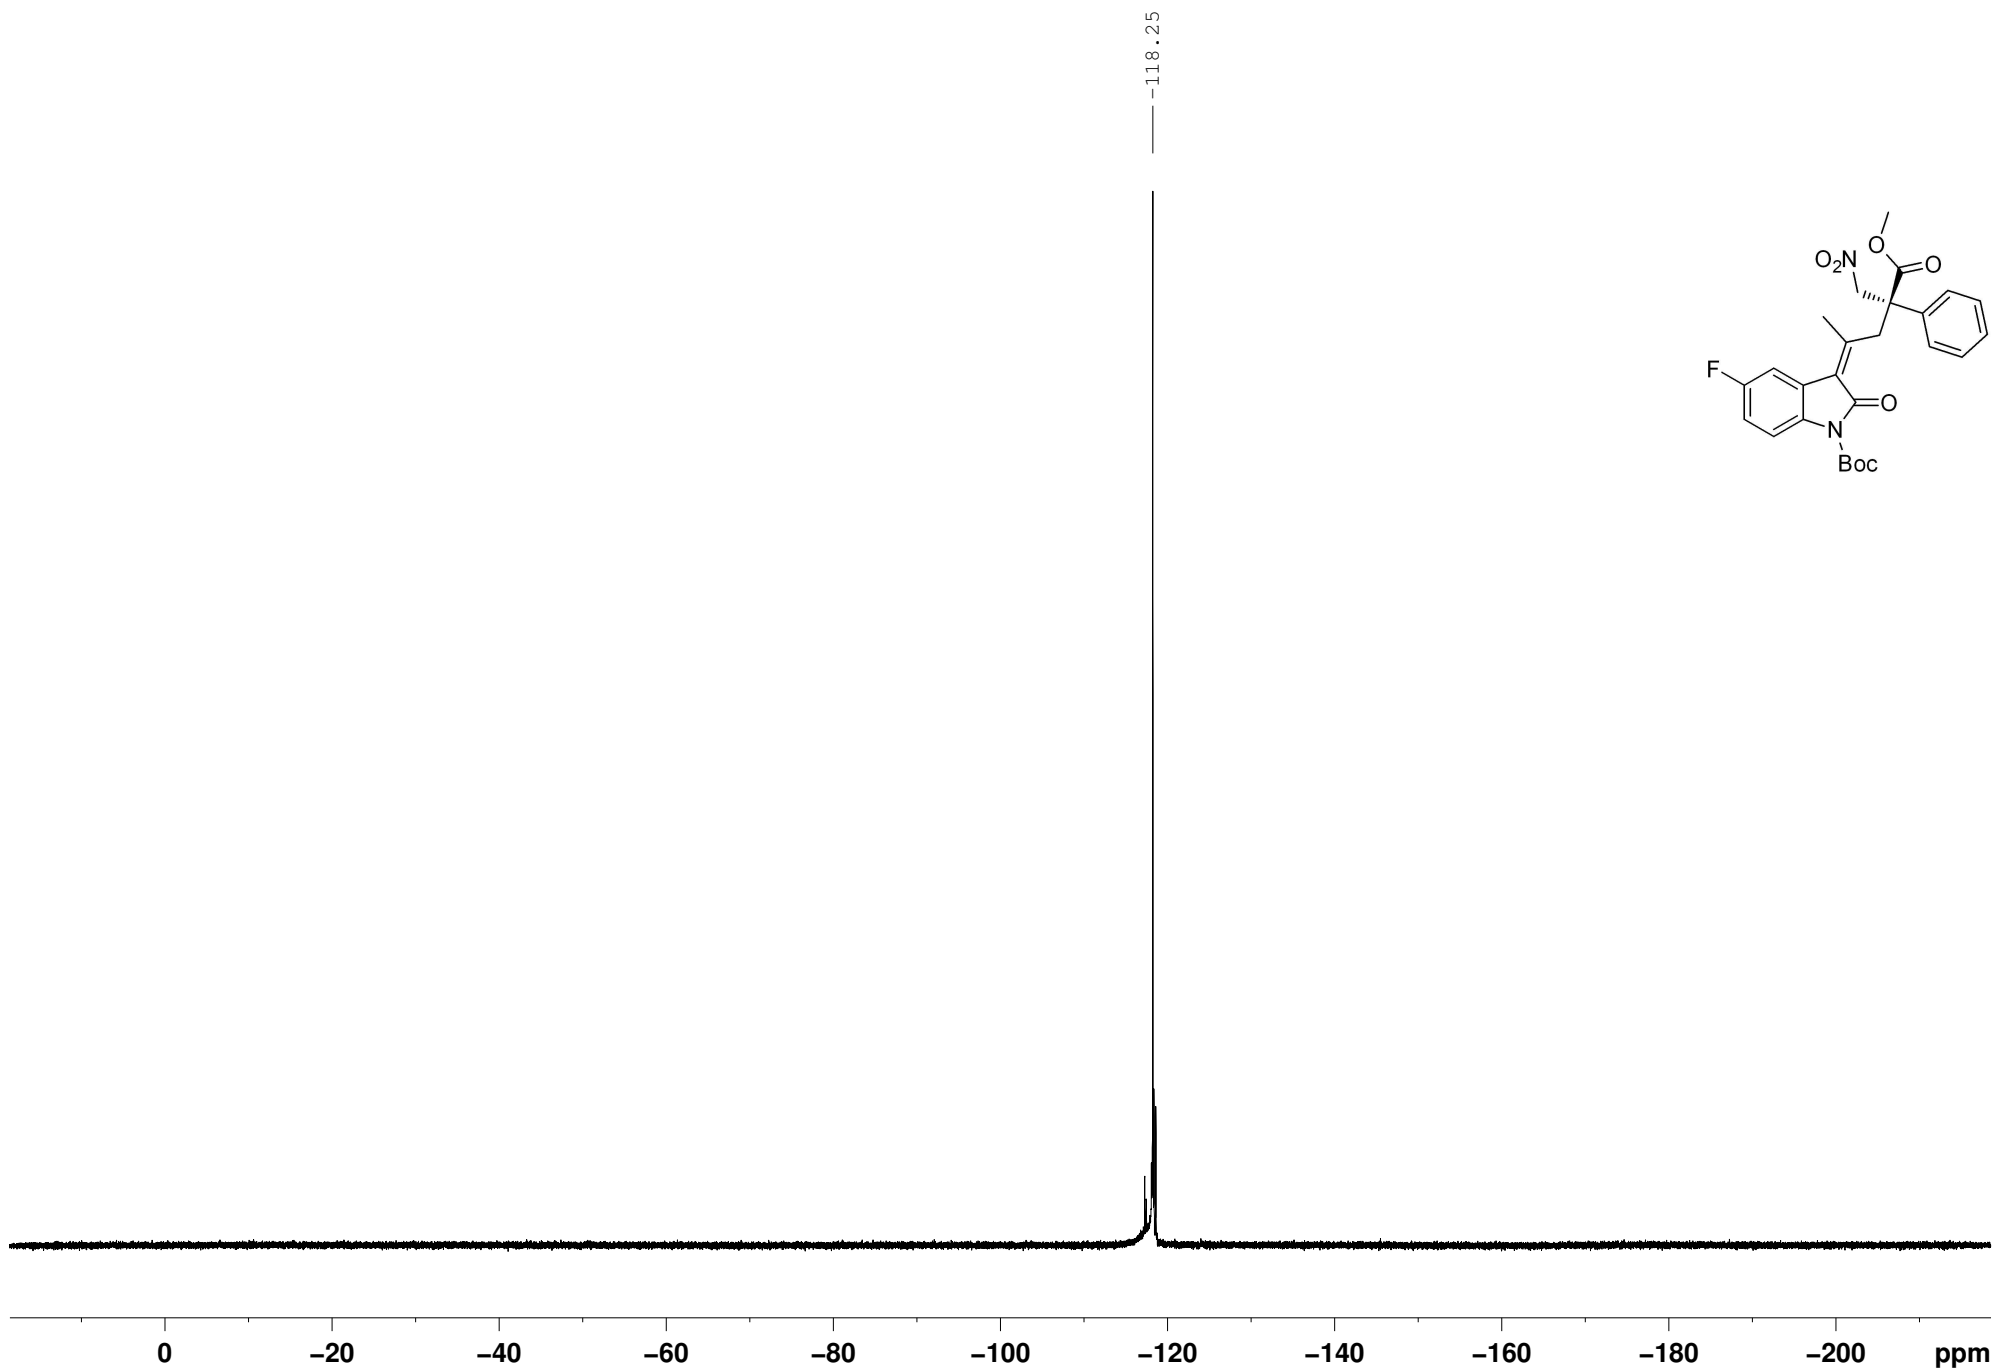

7.642  
7.613  
7.493  
7.487  
7.355  
7.348  
7.326  
7.319  
7.286  
7.274  
7.245  
7.238  
7.224  
7.220  
7.208  
7.192

5.370  
5.318  
5.075  
5.023

4.105  
4.063  
3.748  
3.720  
3.678

2.086

1.585

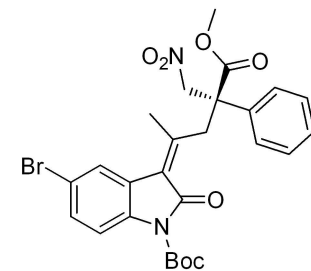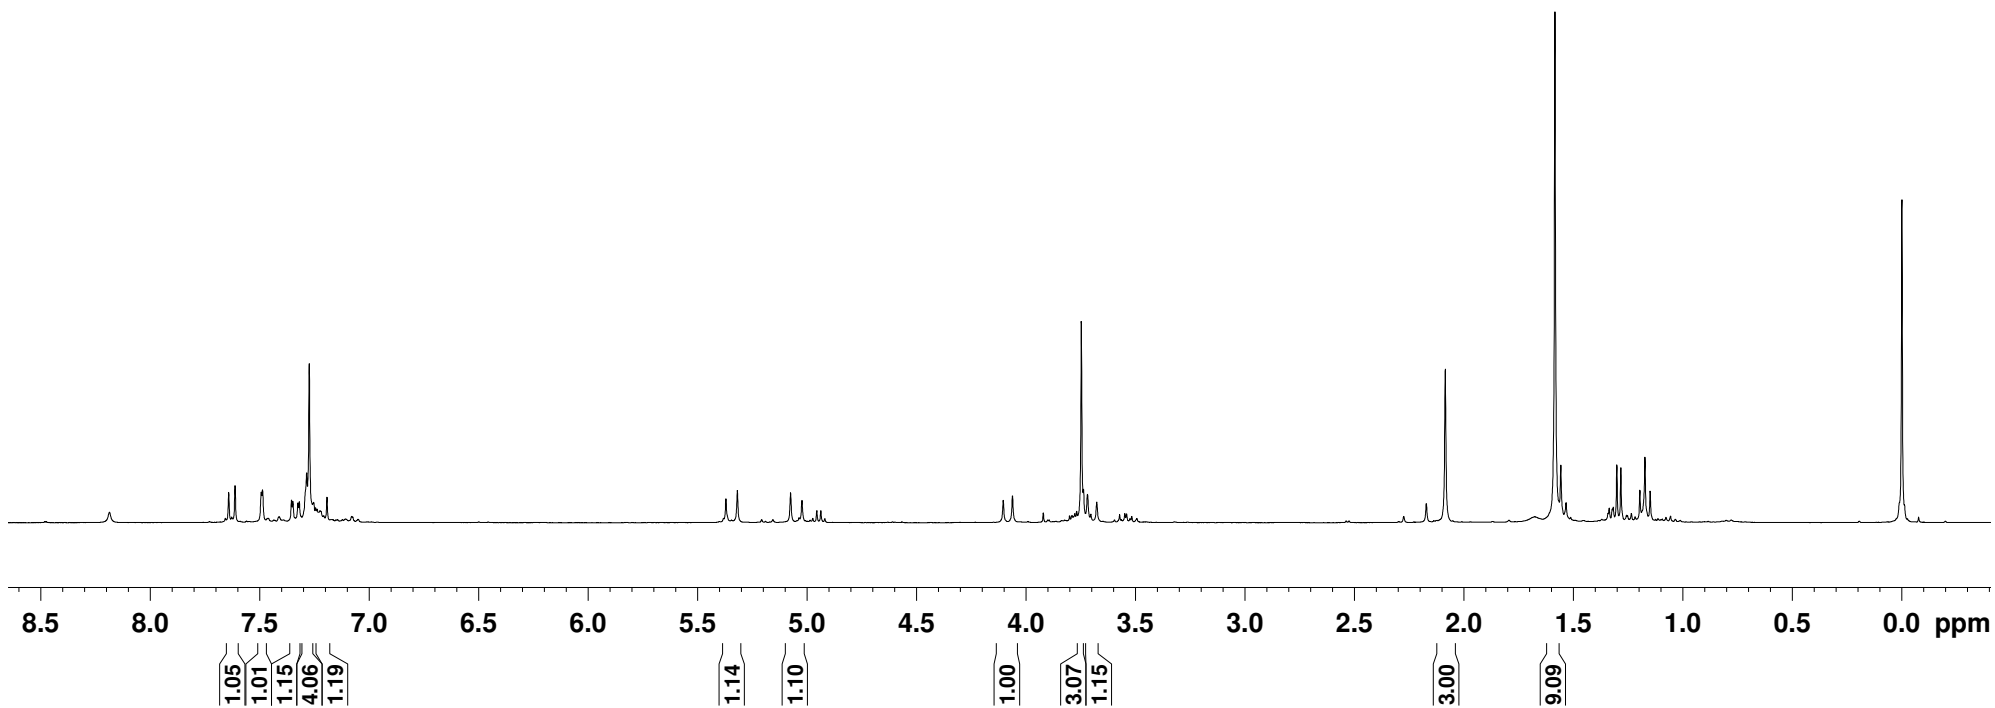

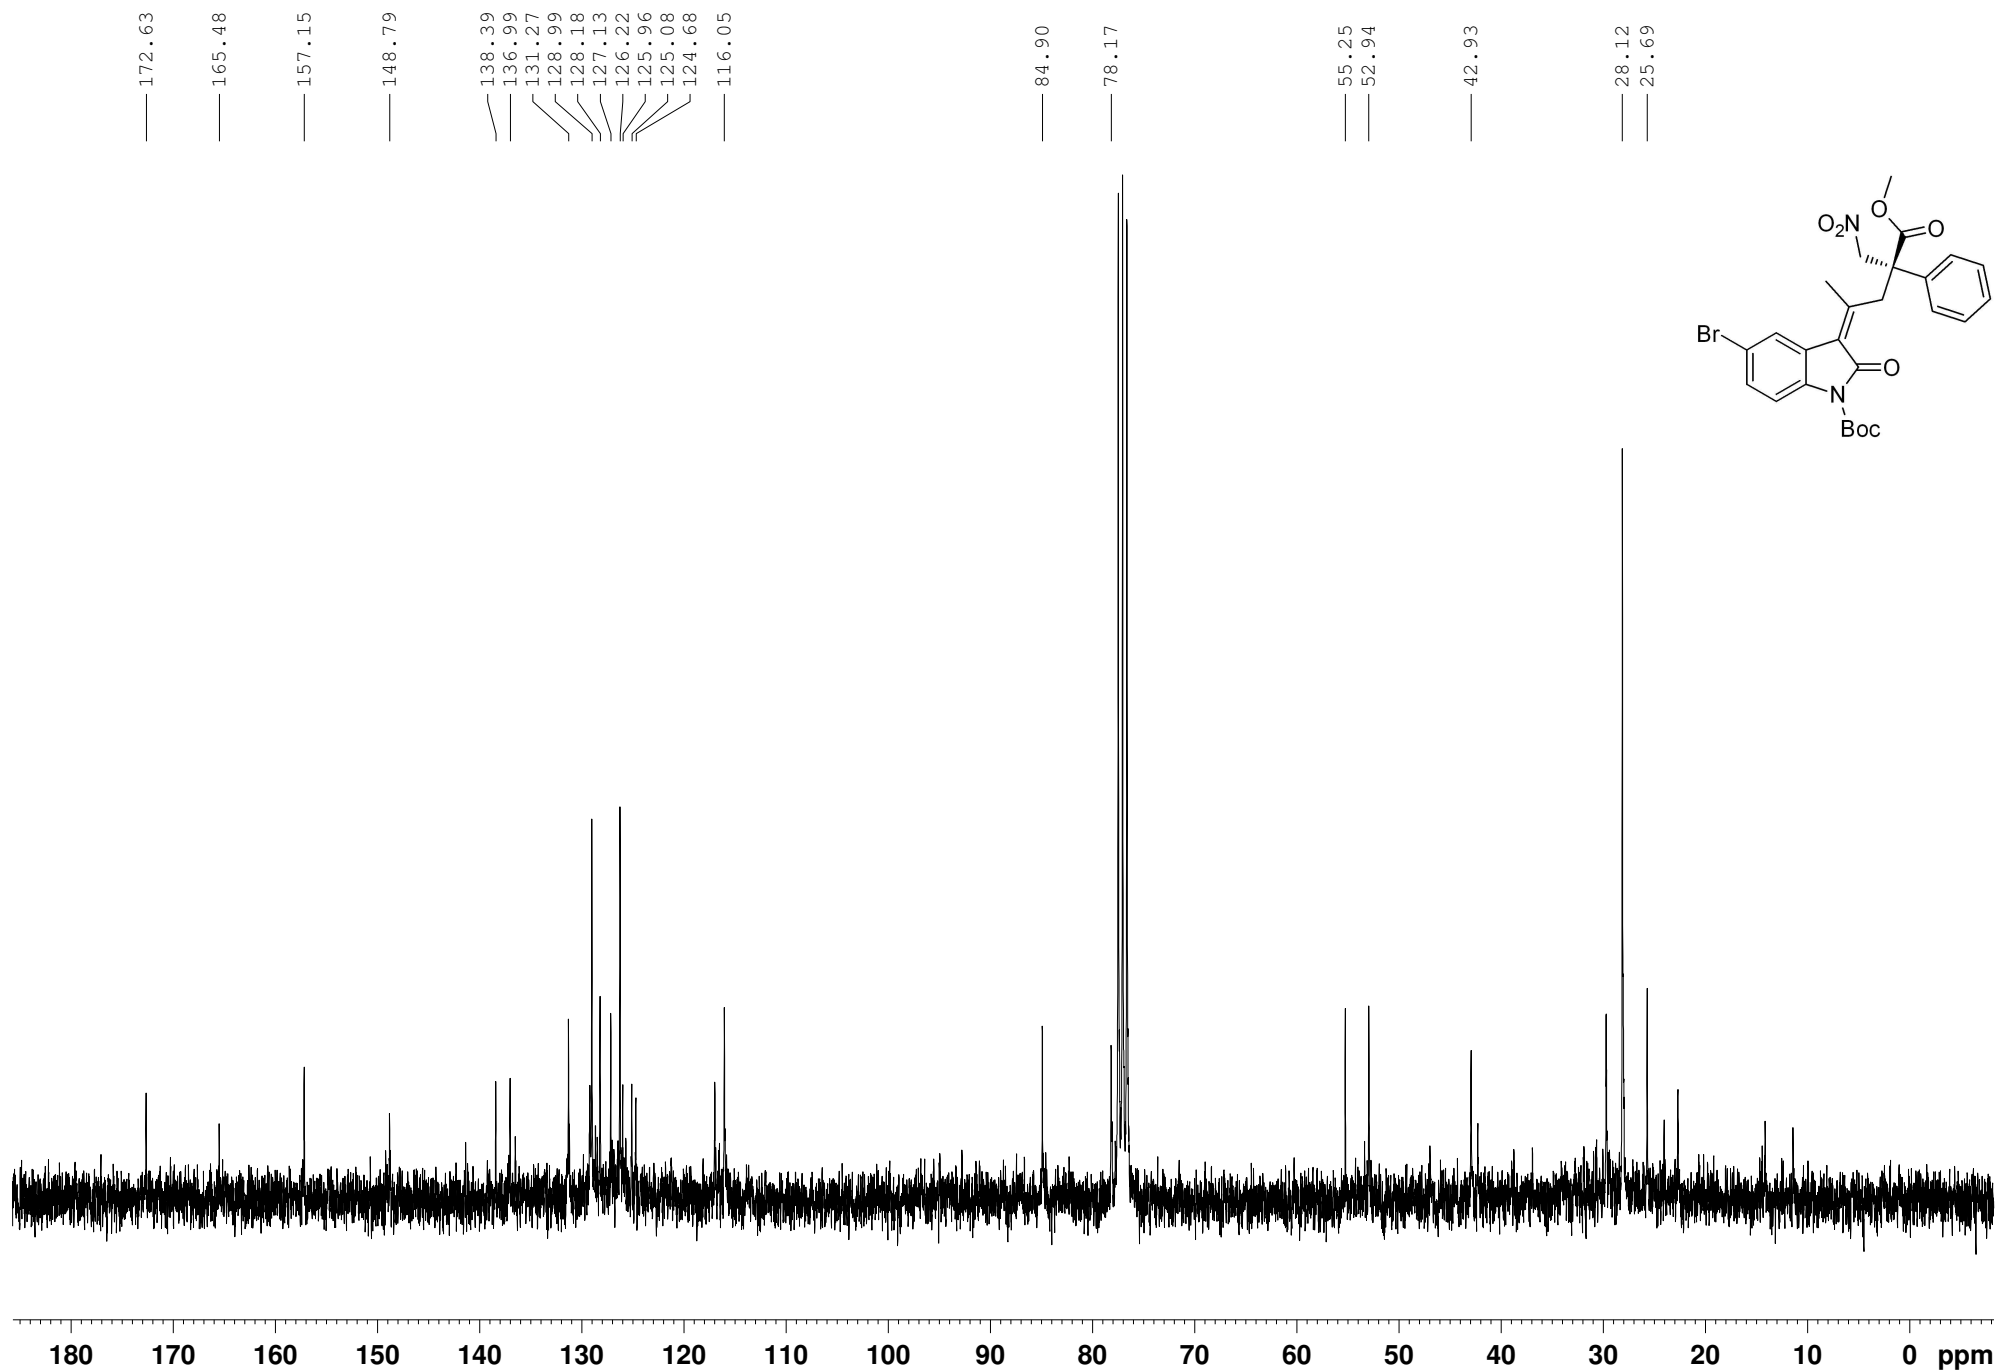

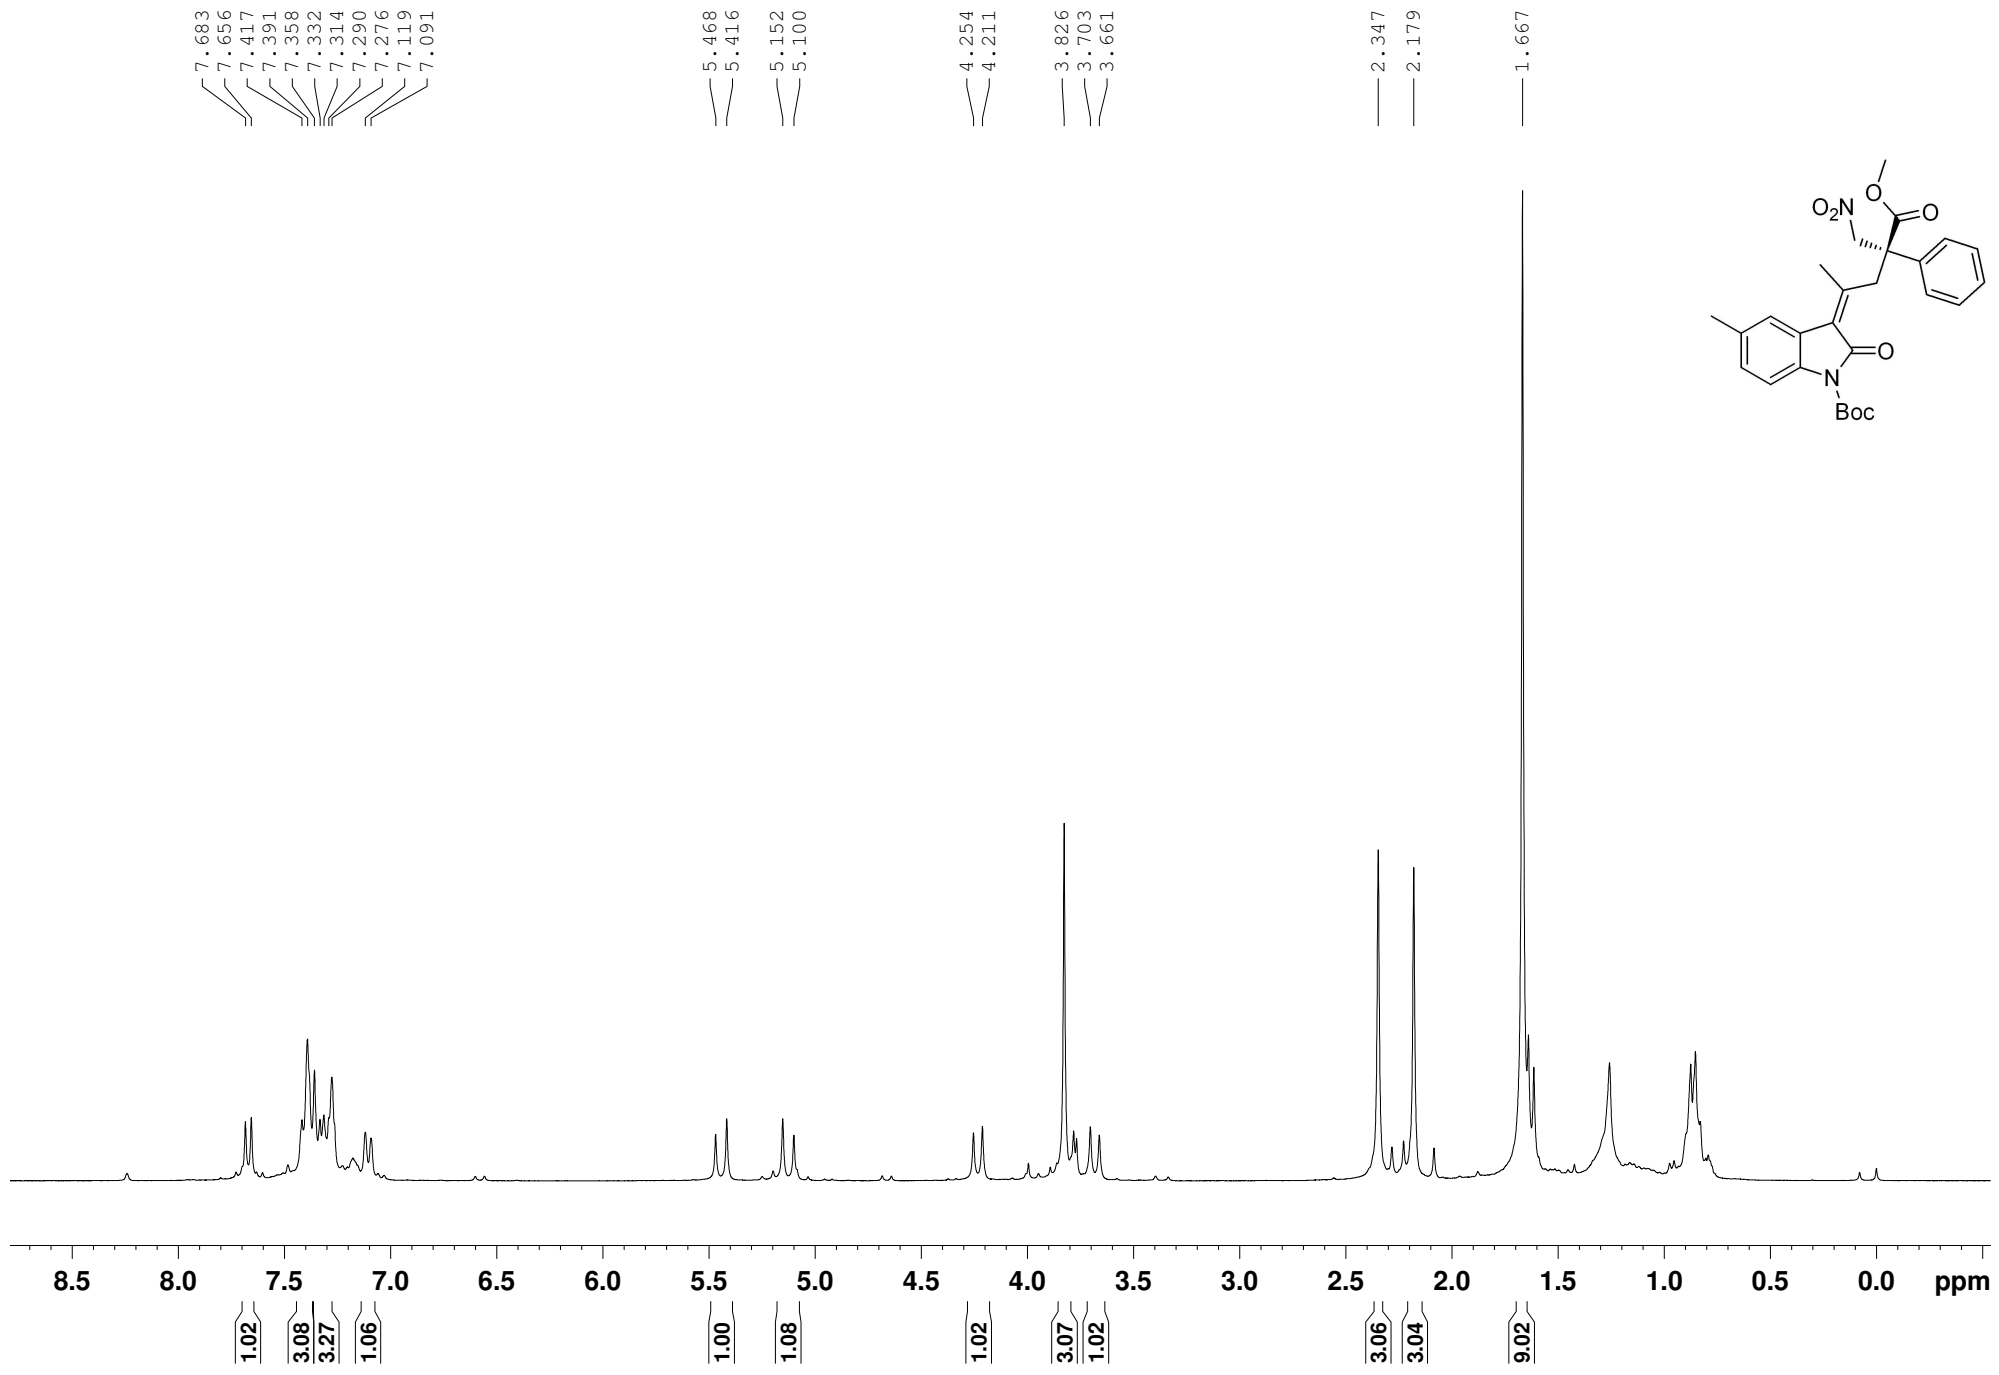

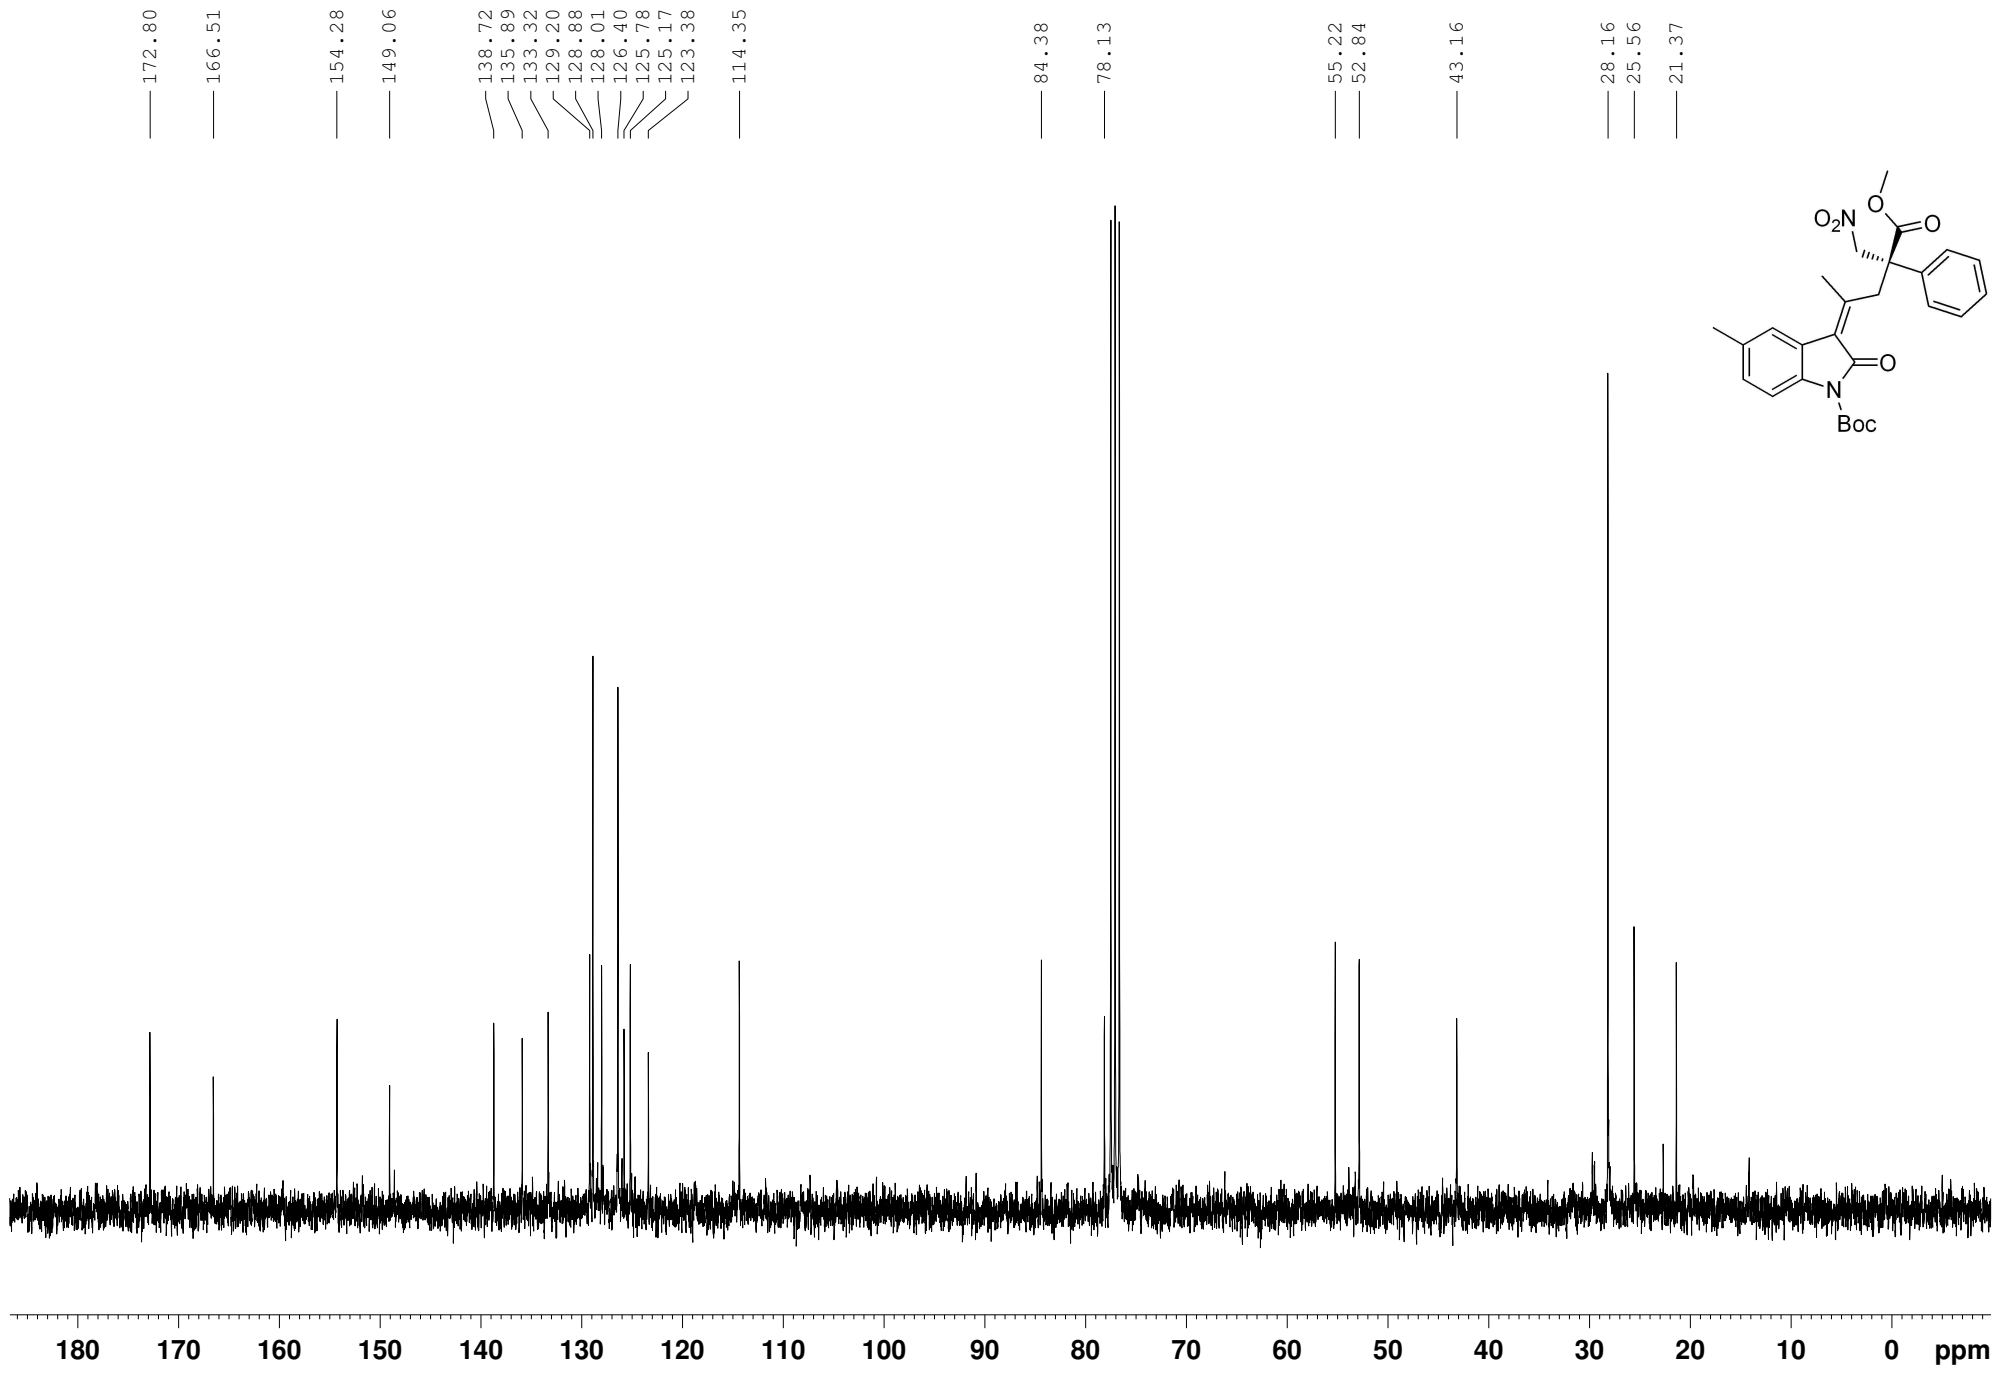

— 172.80

— 166.51

— 154.28

— 149.06

— 138.72

— 135.89

— 133.32

— 129.20

— 128.88

— 128.01

— 126.40

— 125.78

— 125.17

— 123.38

— 114.35

— 84.38

— 78.13

— 55.22

— 52.84

— 43.16

— 28.16

— 25.56

— 21.37

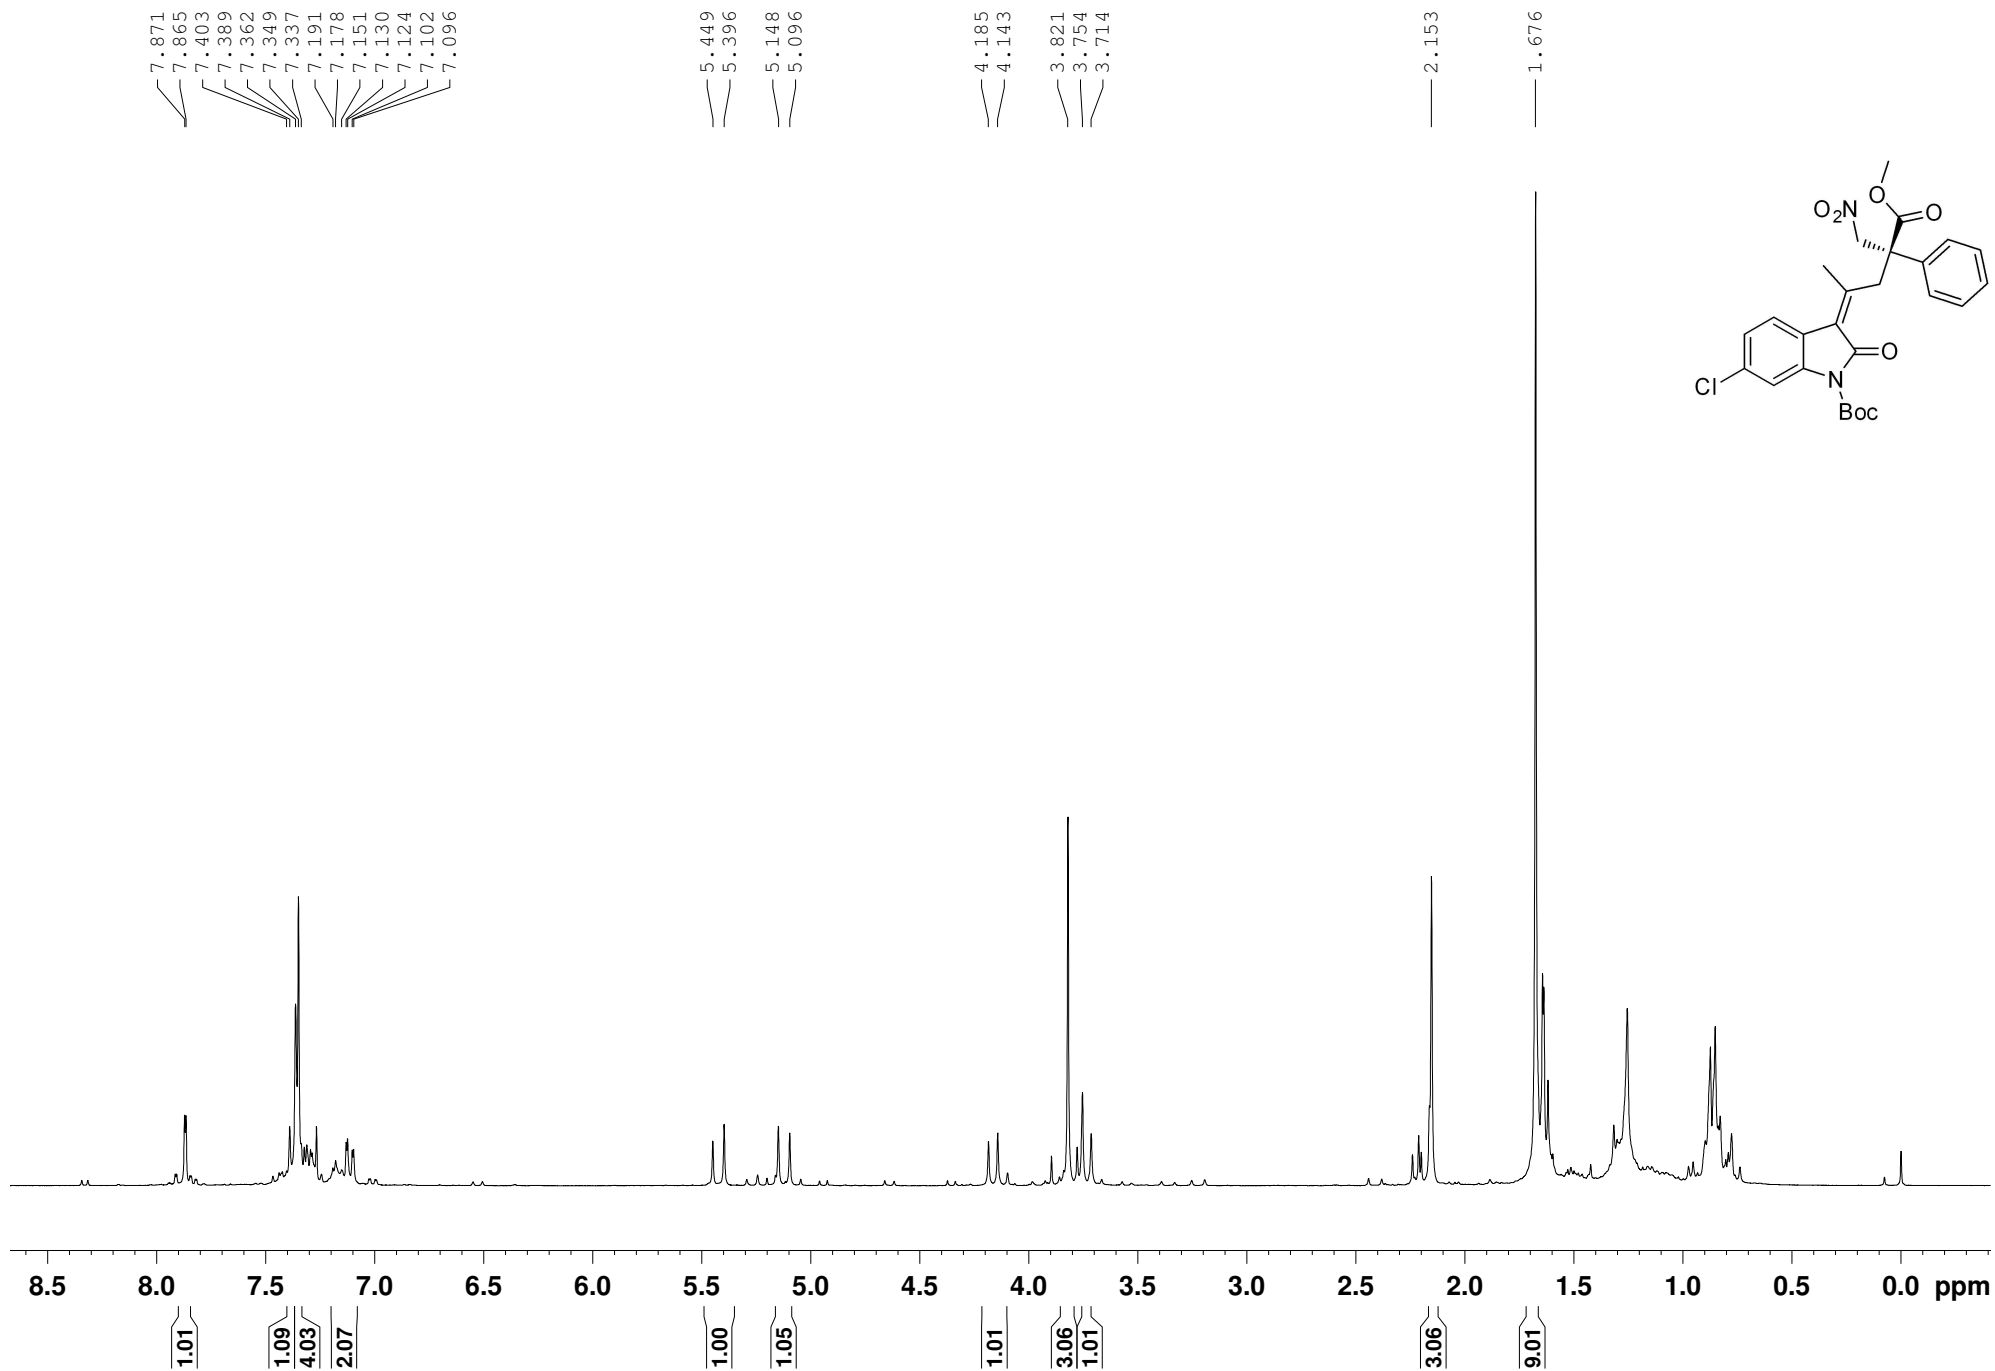

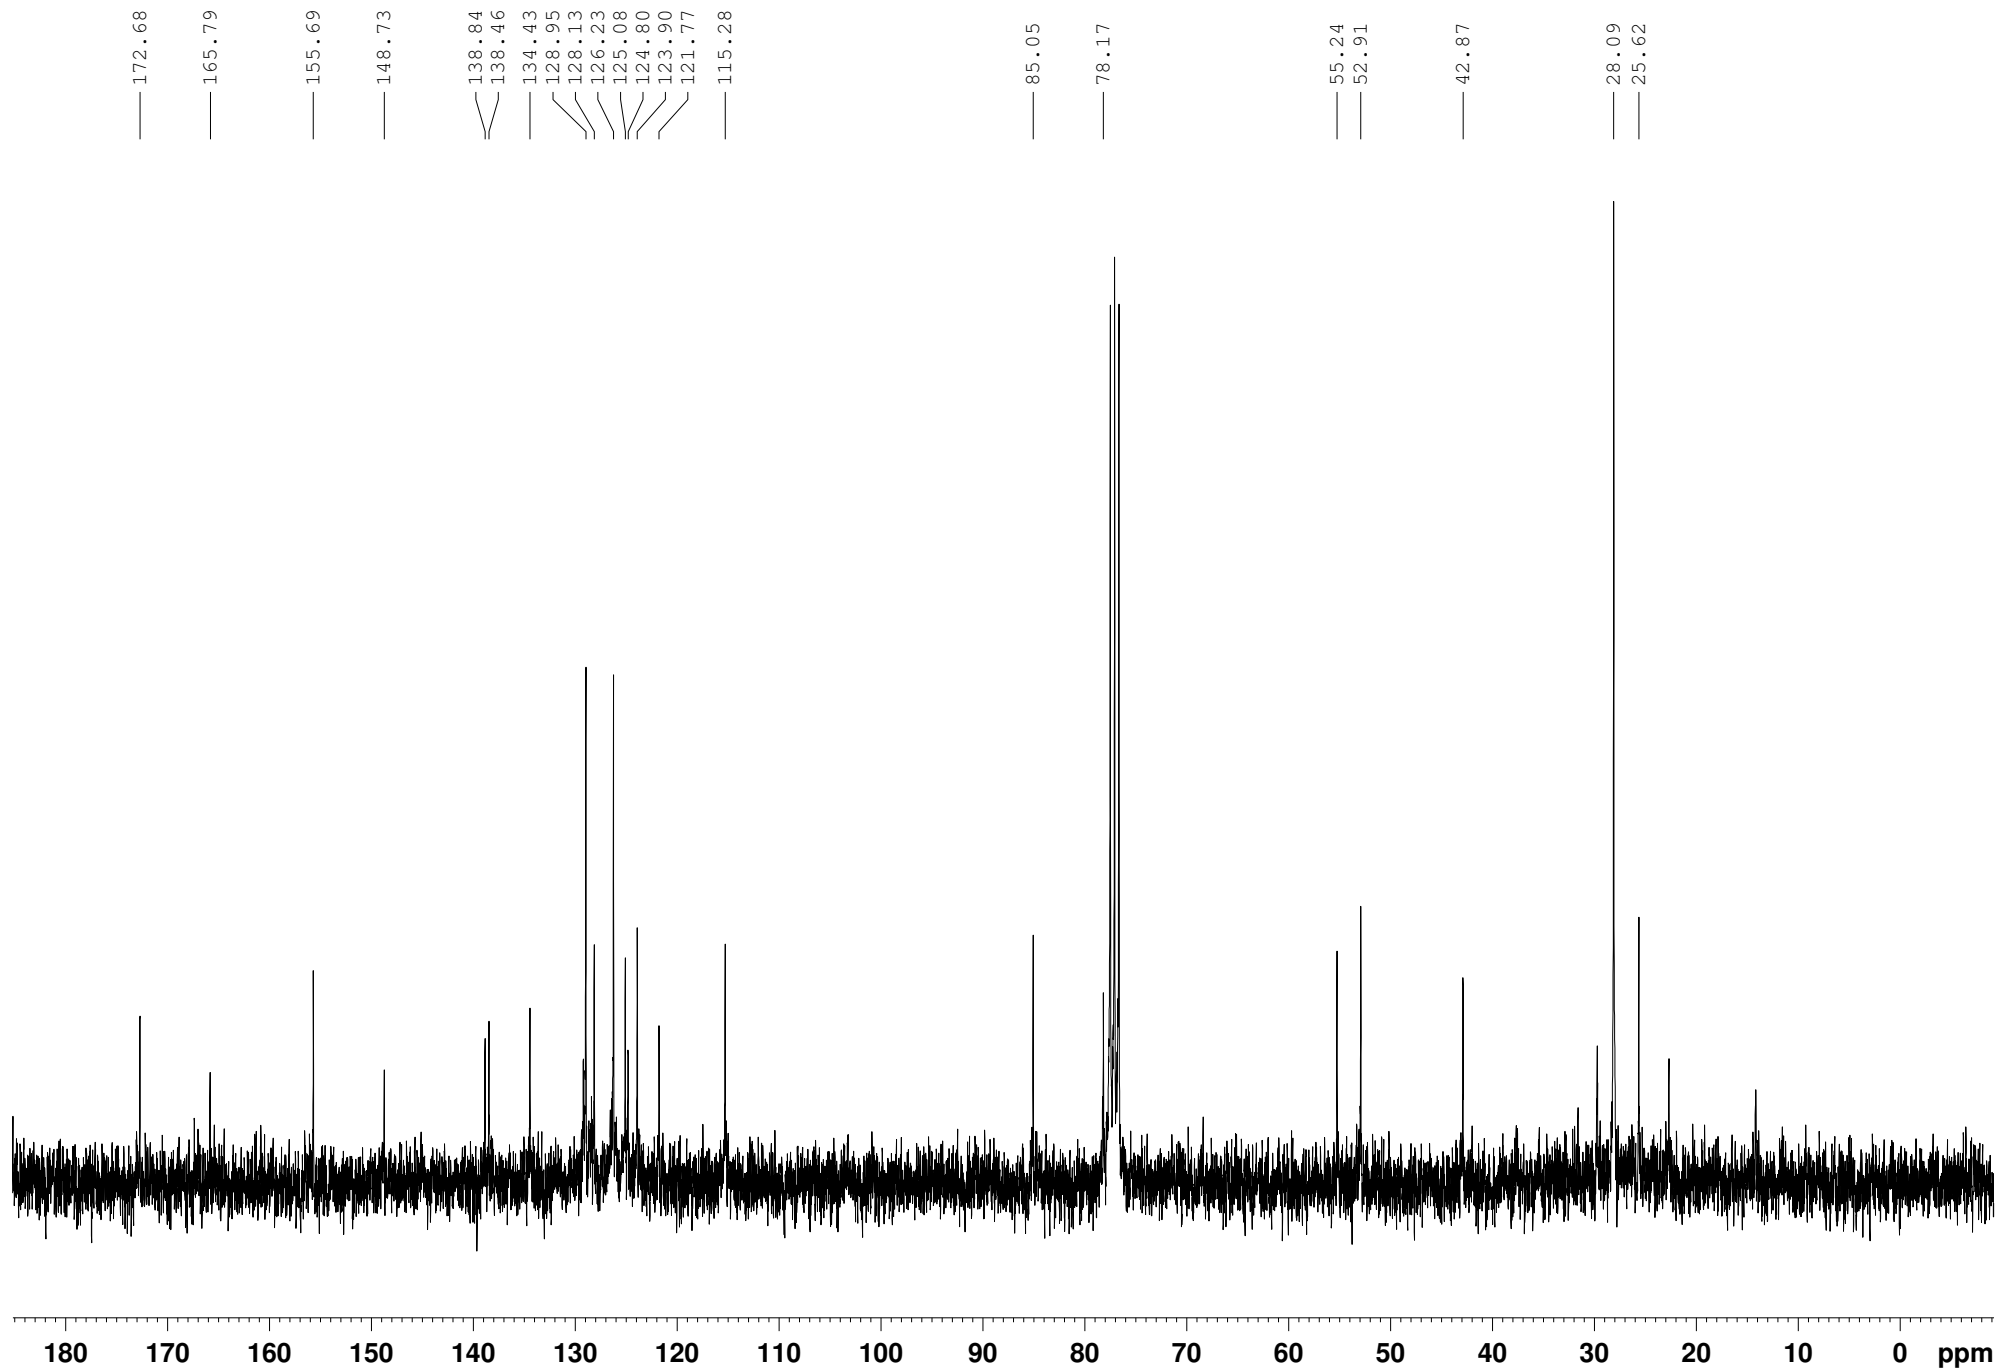

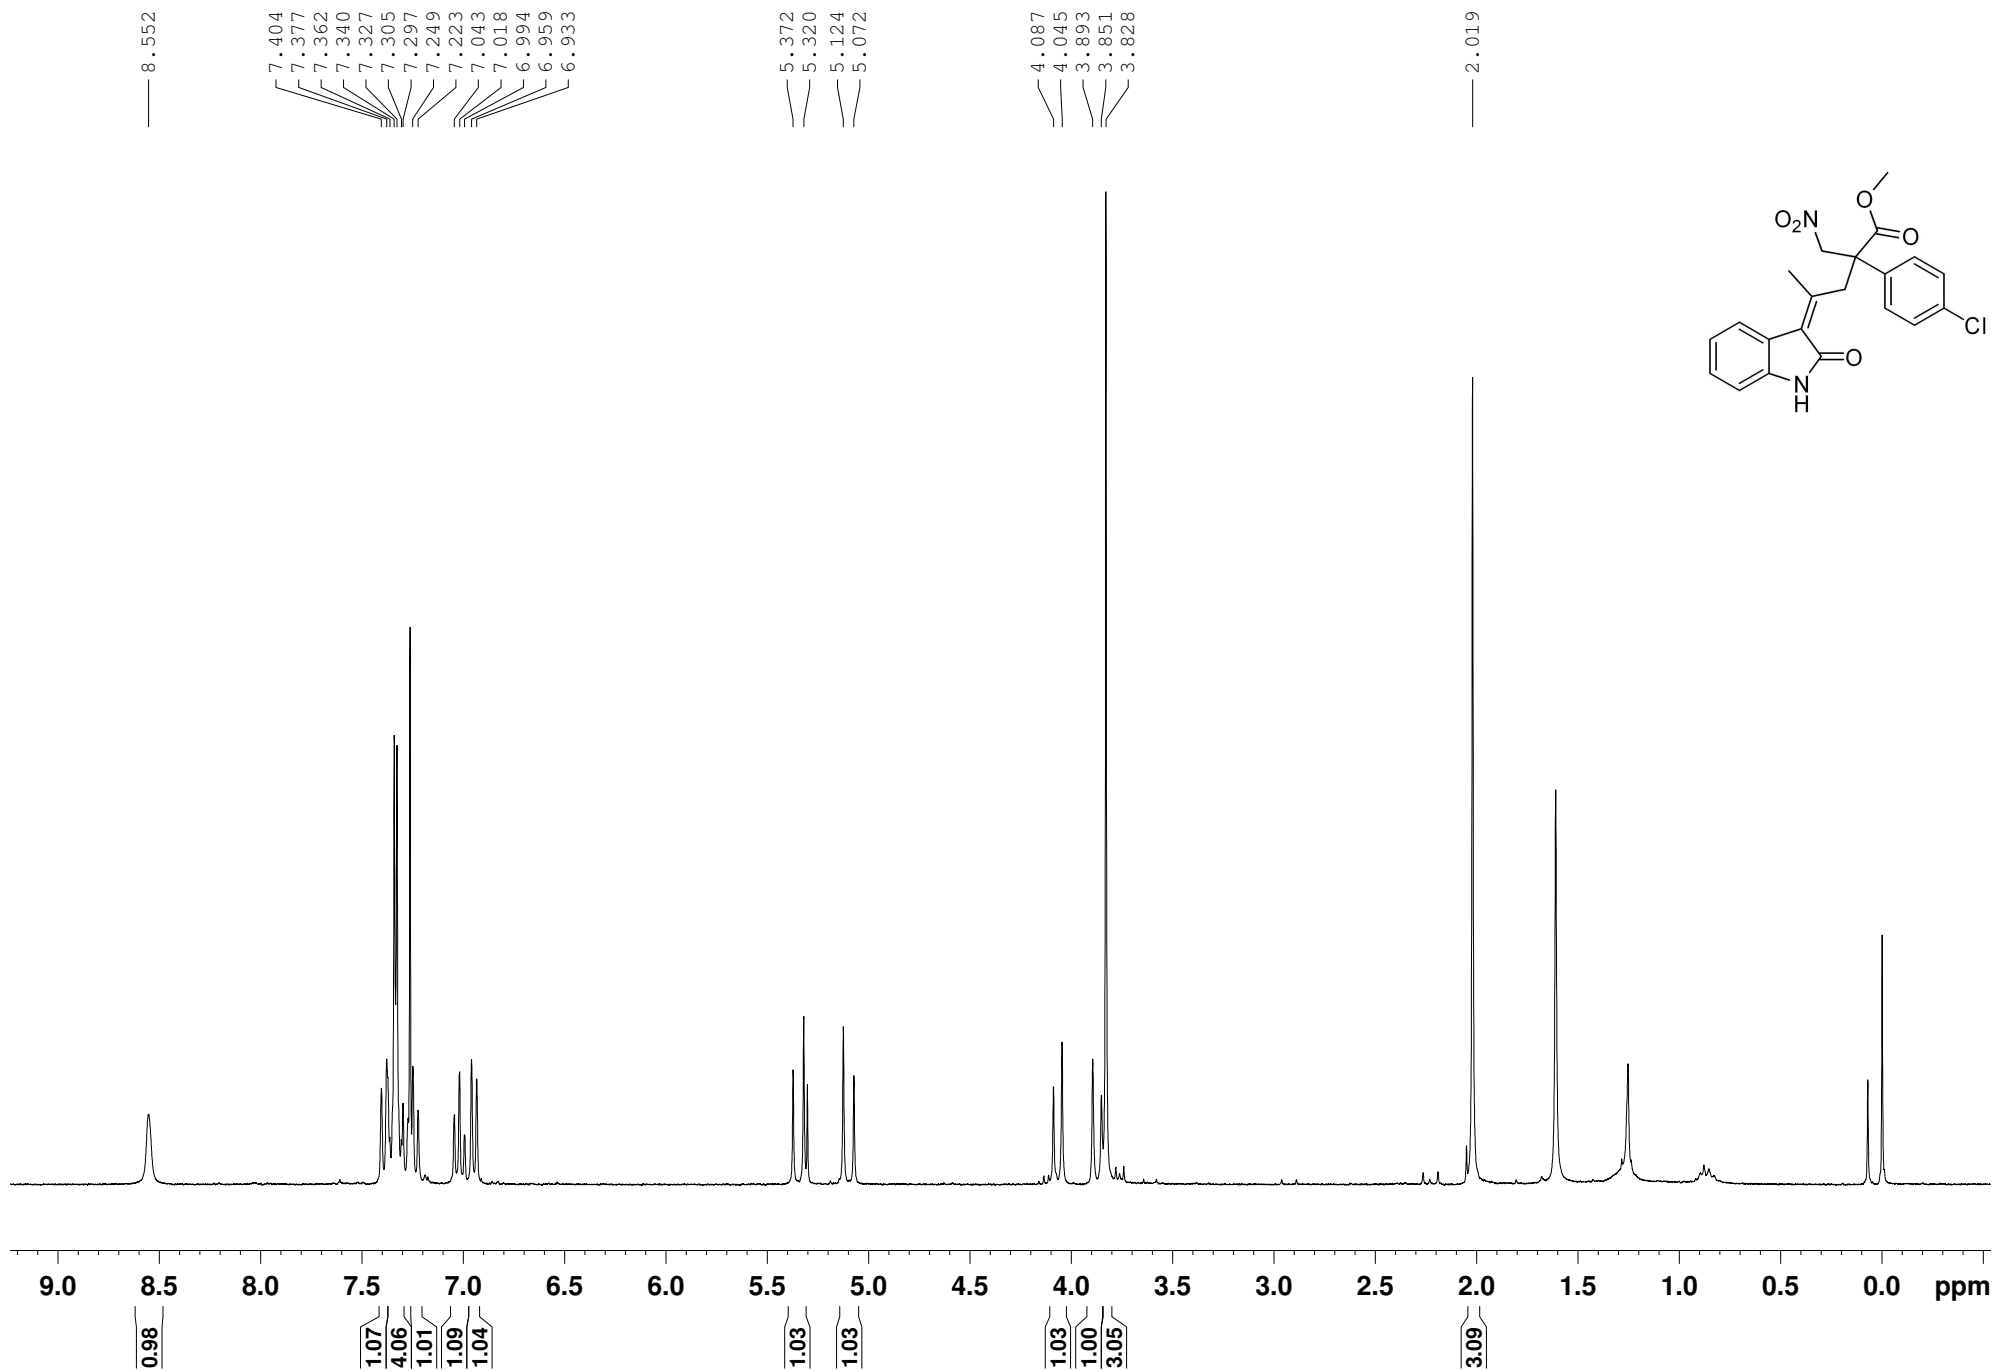



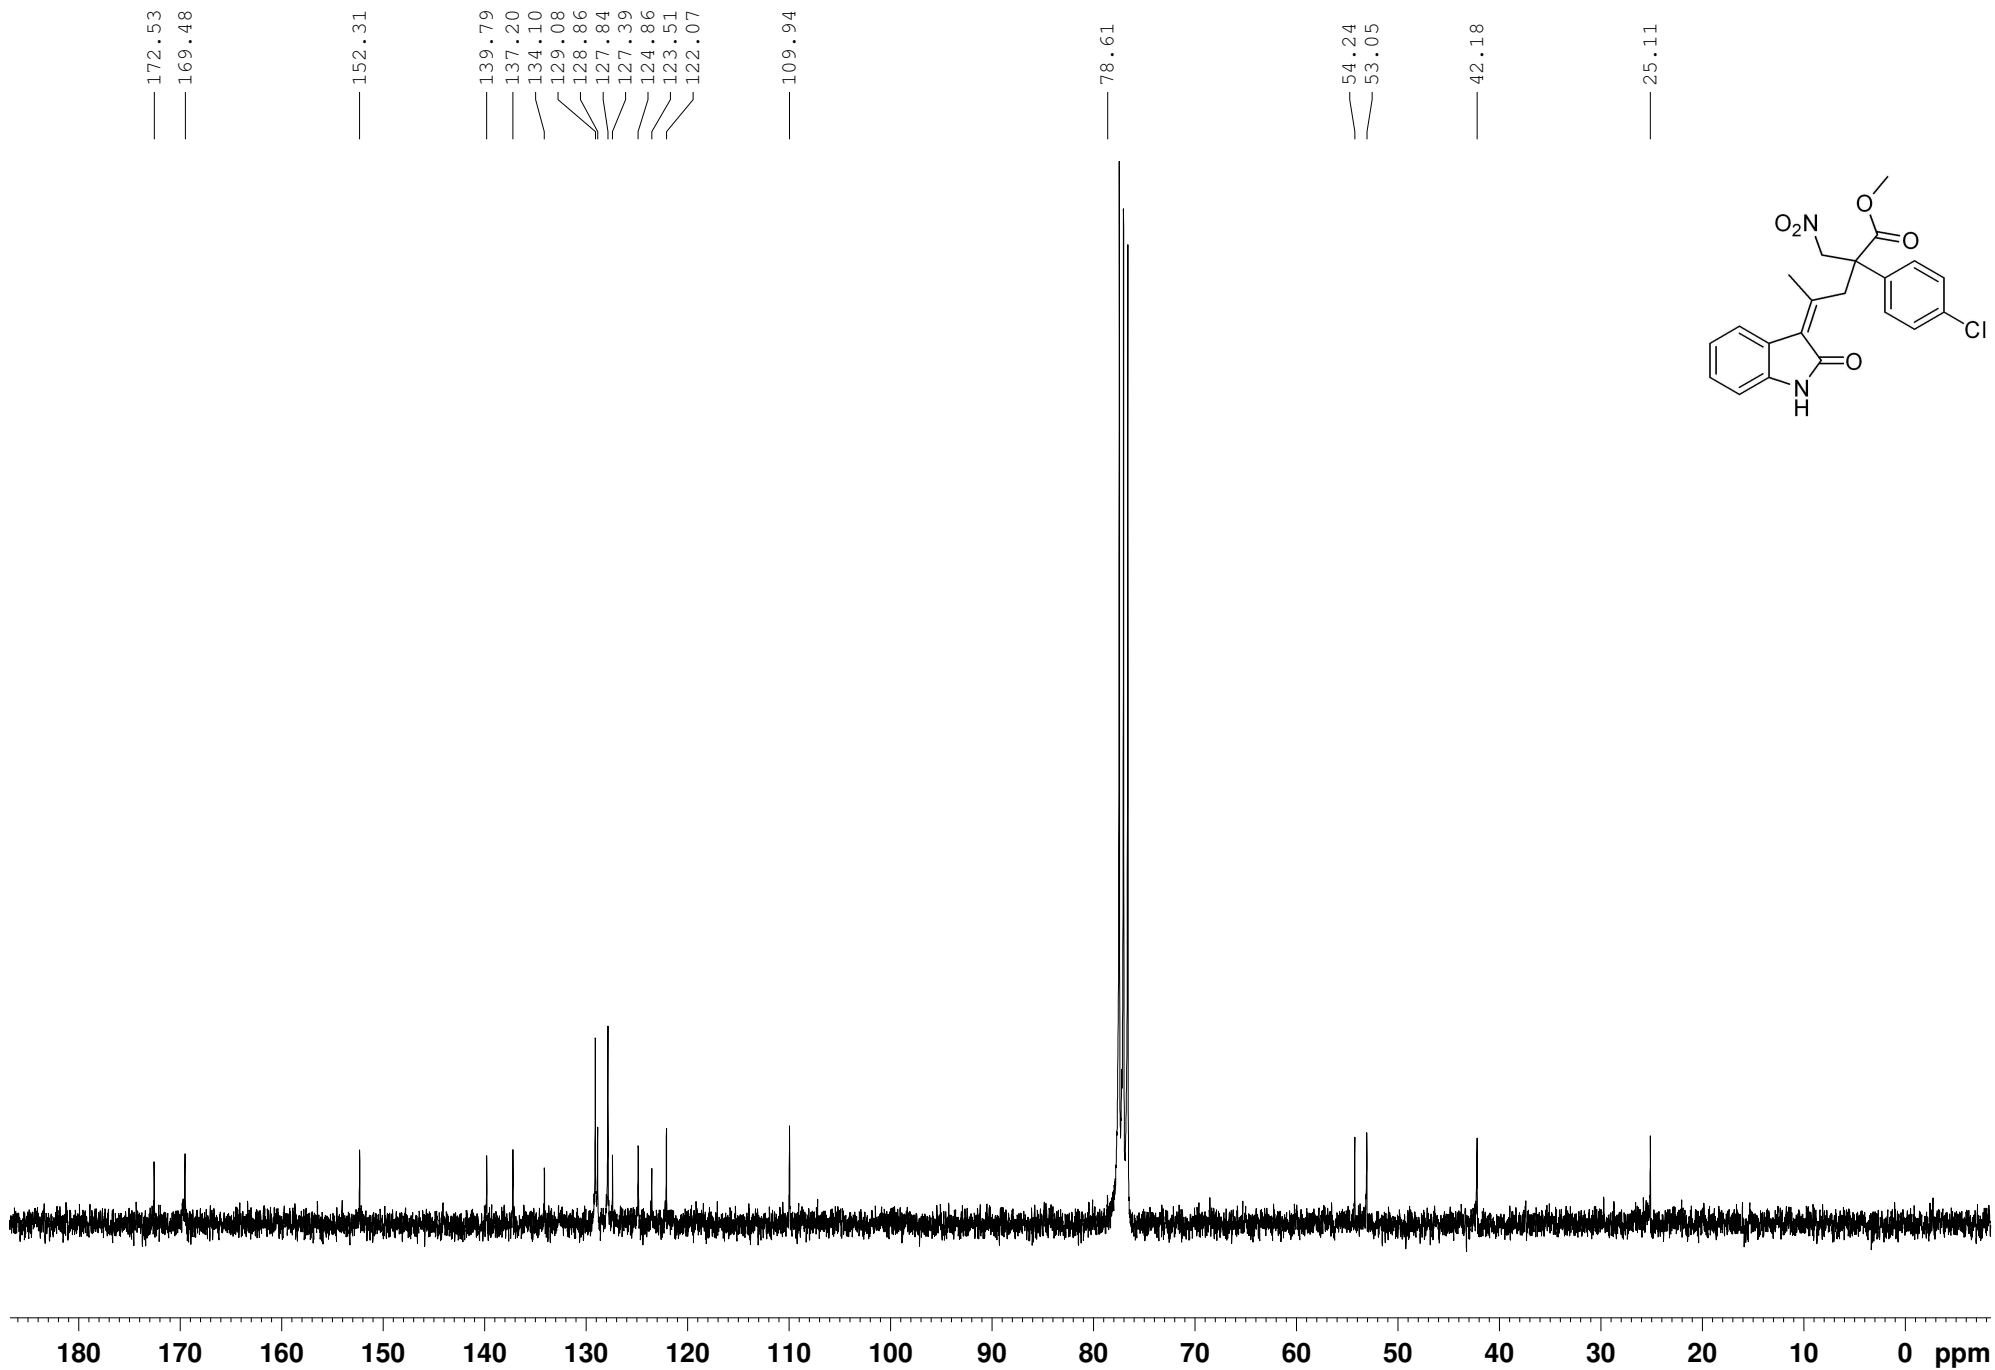

## 9. HPLC Chromatogram of Compounds 4

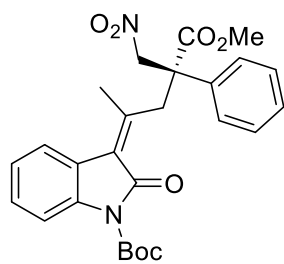

4a

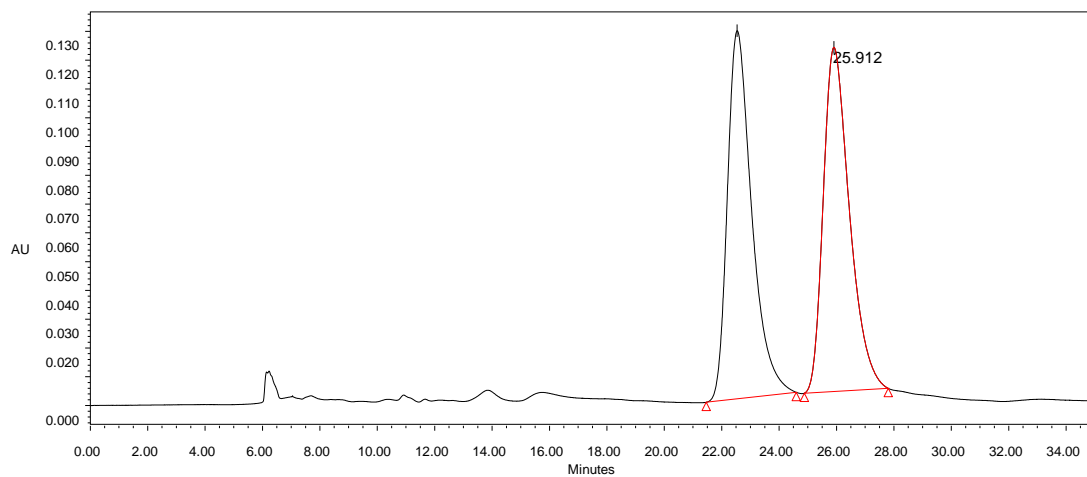

| Entry | Retention Time | Area    | Area (%) | Height | Int Type | Peak Type |
|-------|----------------|---------|----------|--------|----------|-----------|
| 1     | 22.538         | 7548024 | 49.93    | 127947 | bb       | Unknown   |
| 2     | 25.912         | 7569823 | 50.07    | 119586 | bb       | Unknown   |

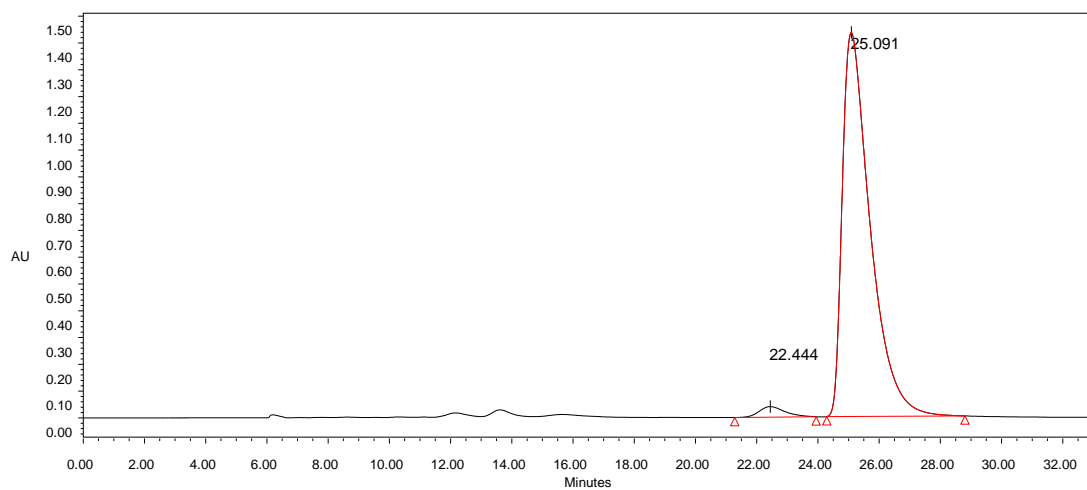

| Entry | Retention Time | Area     | Area (%) | Height  | Int Type | Peak Type |
|-------|----------------|----------|----------|---------|----------|-----------|
| 1     | 22.444         | 2308798  | 2.48     | 39322   | bb       | Unknown   |
| 2     | 25.091         | 90694221 | 97.52    | 1434018 | bb       | Unknown   |

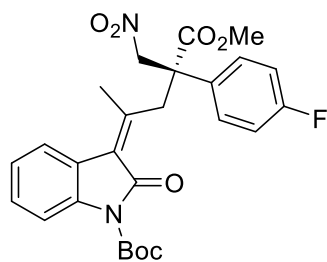

4b

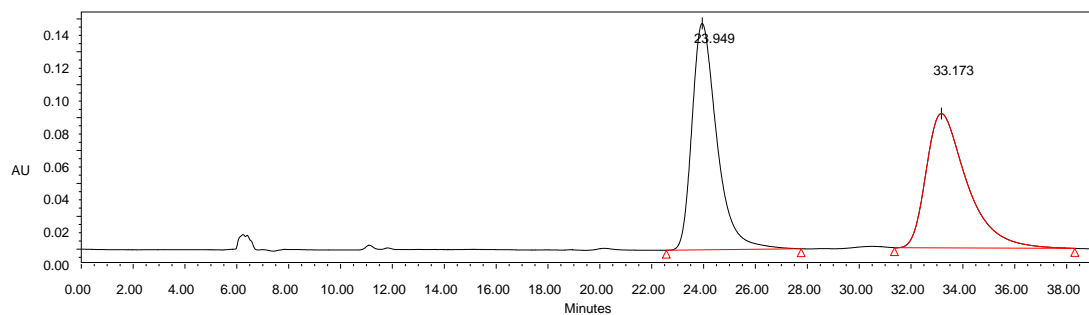

| Entry | Retention Time | Area    | Area (%) | Height | Int Type | Peak Type |
|-------|----------------|---------|----------|--------|----------|-----------|
| 1     | 23.949         | 9182080 | 50.65    | 137716 | bb       | Unknown   |
| 2     | 33.173         | 8946114 | 49.35    | 81698  | bb       | Unknown   |

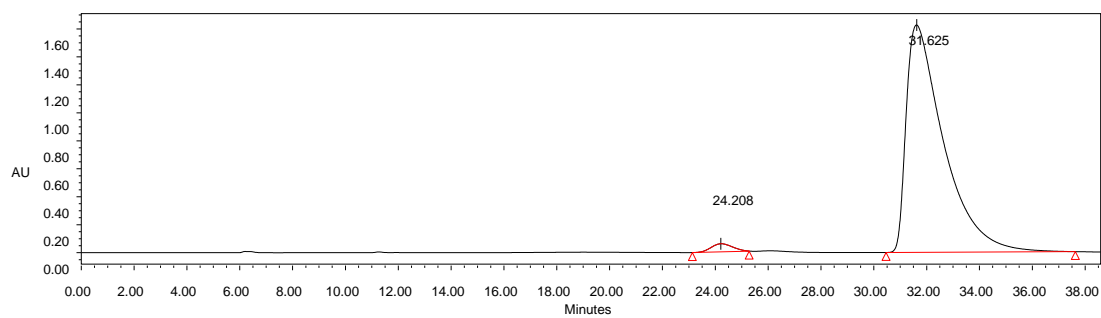

| Entry | Retention Time | Area      | Area (%) | Height  | Int Type | Peak Type |
|-------|----------------|-----------|----------|---------|----------|-----------|
| 1     | 24.208         | 3239664   | 1.98     | 57740   | bb       | Unknown   |
| 2     | 31.625         | 160257161 | 98.02    | 1625658 | bb       | Unknown   |

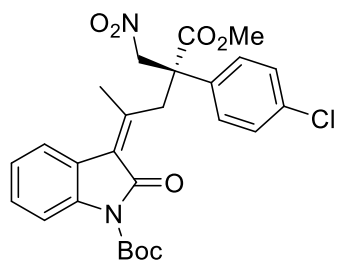

4c

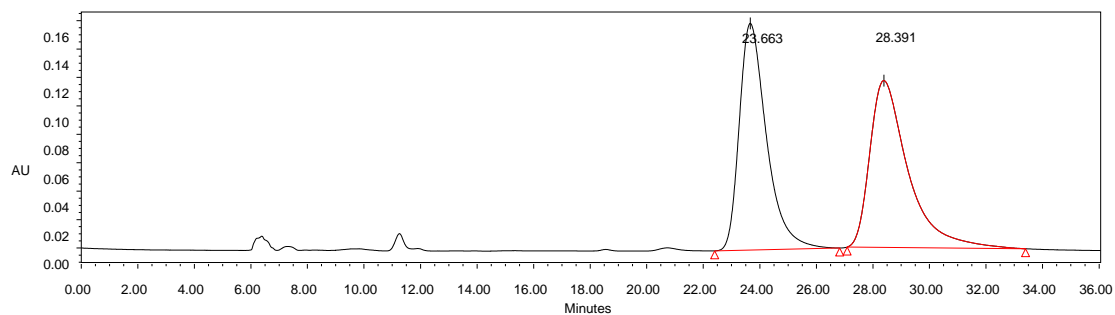

| Entry | Retention Time | Area     | Area (%) | Height | Int Type | Peak Type |
|-------|----------------|----------|----------|--------|----------|-----------|
| 1     | 23.663         | 10676134 | 49.19    | 159487 | bb       | Unknown   |
| 2     | 28.391         | 11027032 | 50.81    | 117385 | bb       | Unknown   |

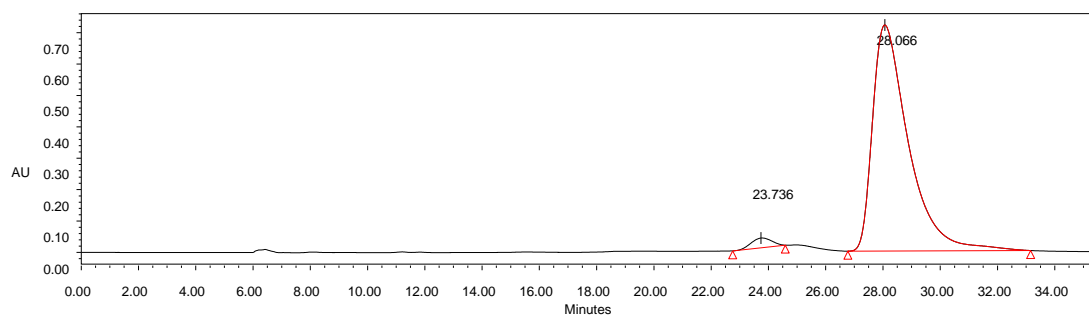

| Entry | Retention Time | Area     | Area (%) | Height | Int Type | Peak Type |
|-------|----------------|----------|----------|--------|----------|-----------|
| 1     | 23.736         | 1555436  | 2.42     | 31181  | bb       | Unknown   |
| 2     | 28.066         | 62682534 | 97.58    | 720397 | bb       | Unknown   |

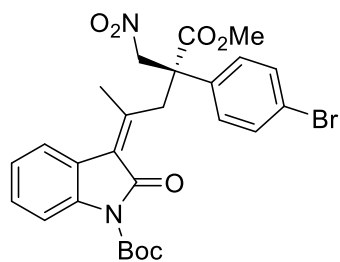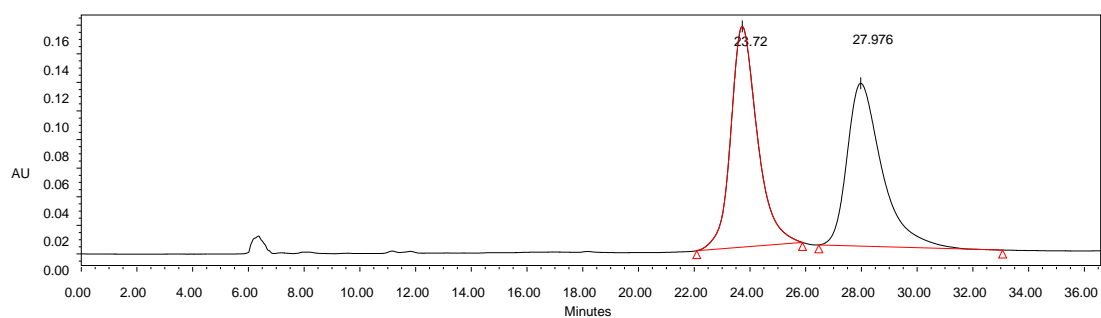

| Entry | Retention Time | Area     | Area (%) | Height | Int Type | Peak Type |
|-------|----------------|----------|----------|--------|----------|-----------|
| 1     | 23.724         | 10252334 | 50.94    | 154384 | bb       | Unknown   |
| 2     | 27.976         | 9874652  | 49.06    | 113816 | bb       | Unknown   |

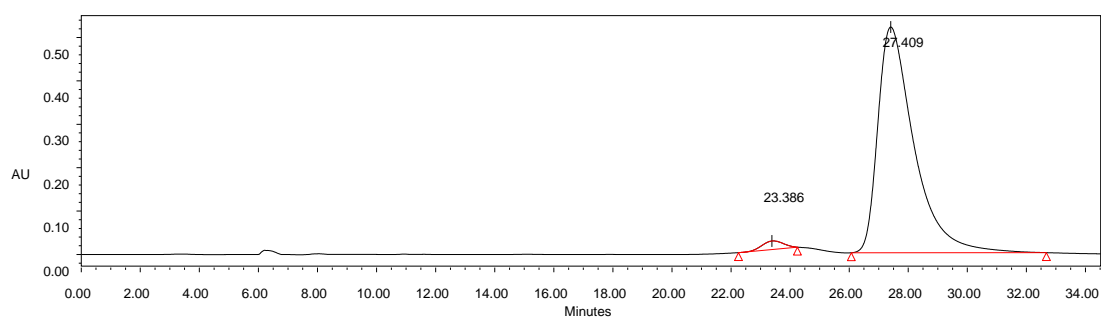

| Entry | Retention Time | Area     | Area (%) | Height | Int Type | Peak Type |
|-------|----------------|----------|----------|--------|----------|-----------|
| 1     | 23.386         | 987340   | 2.18     | 19730  | bb       | Unknown   |
| 2     | 27.409         | 44305742 | 97.82    | 520205 | bb       | Unknown   |

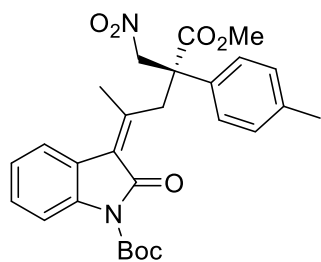

4e

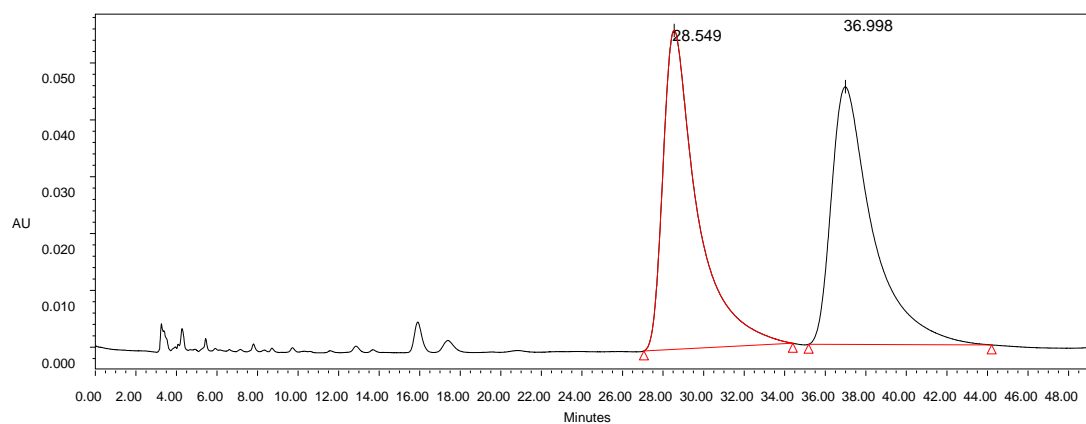

| Entry | Retention Time | Area    | Area (%) | Height | Int Type | Peak Type |
|-------|----------------|---------|----------|--------|----------|-----------|
| 1     | 28.549         | 6590049 | 50.69    | 56100  | bb       | Unknown   |
| 2     | 36.998         | 6411793 | 49.31    | 45326  | bb       | Unknown   |

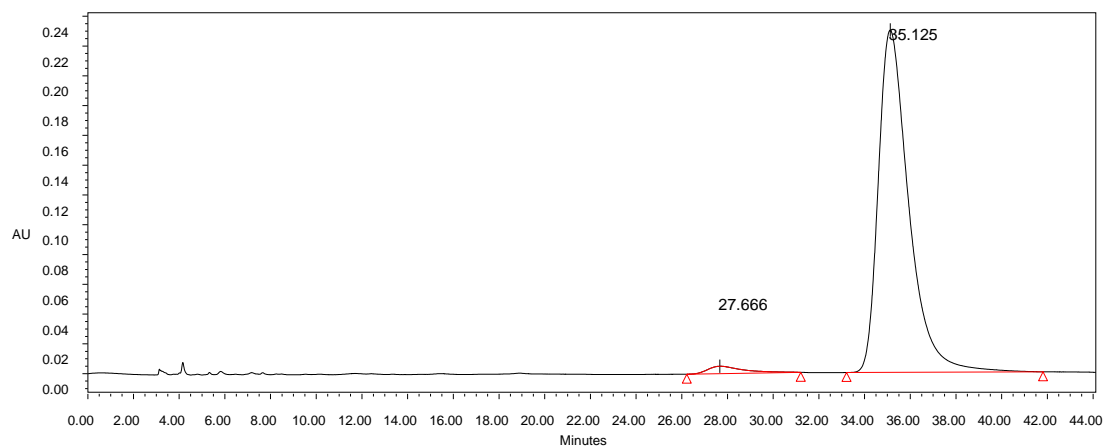

| Entry | Retention Time | Area     | Area (%) | Height | Int Type | Peak Type |
|-------|----------------|----------|----------|--------|----------|-----------|
| 1     | 27.666         | 544395   | 2.49     | 5018   | bb       | Unknown   |
| 2     | 35.125         | 21349543 | 97.51    | 229867 | bb       | Unknown   |

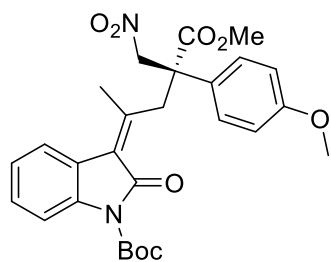

4f

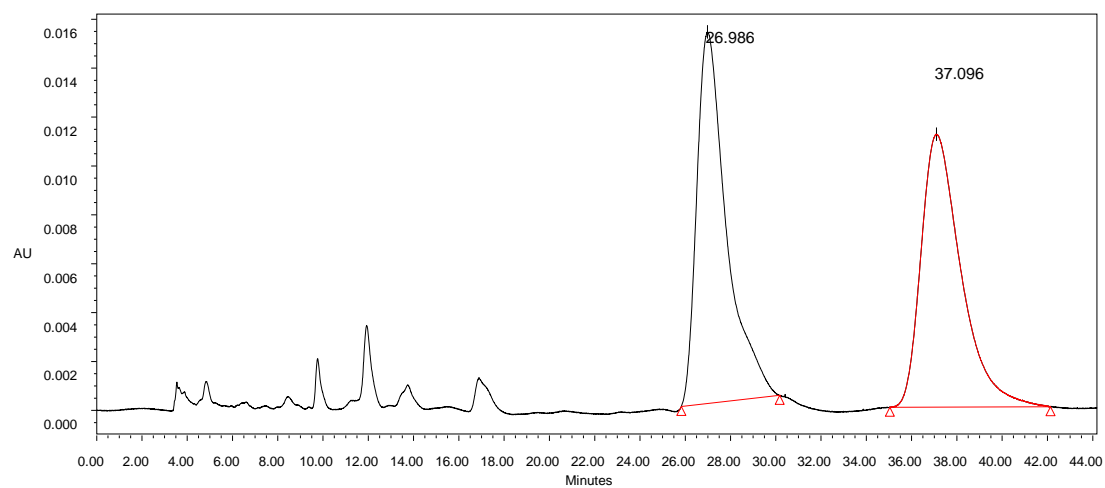

| Entry | Retention Time | Area    | Area (%) | Height | Int Type | Peak Type |
|-------|----------------|---------|----------|--------|----------|-----------|
| 1     | 26.986         | 1385813 | 50.28    | 15201  | bb       | Unknown   |
| 2     | 37.096         | 1370443 | 49.72    | 11162  | bb       | Unknown   |

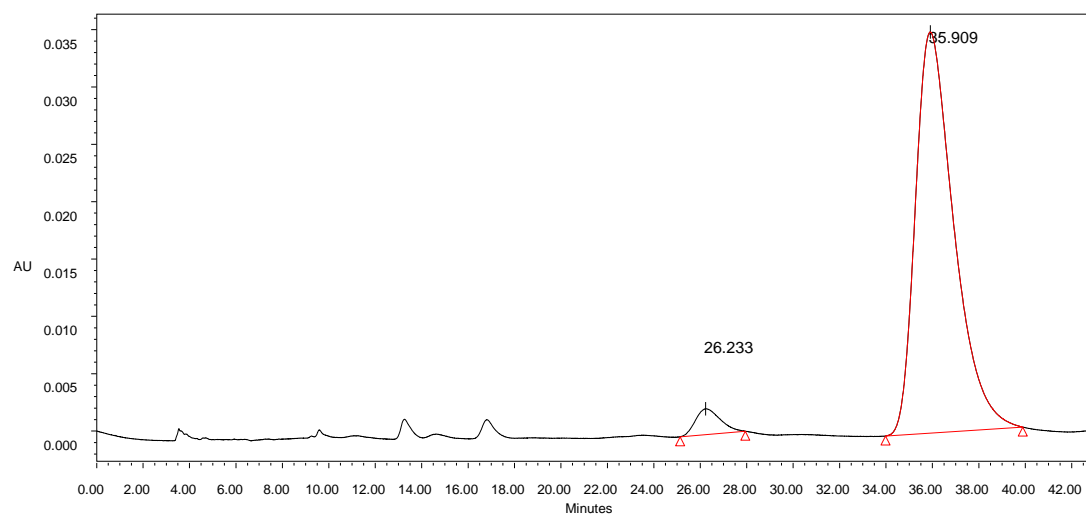

| Entry | Retention Time | Area    | Area (%) | Height | Int Type | Peak Type |
|-------|----------------|---------|----------|--------|----------|-----------|
| 1     | 26.233         | 167276  | 3.98     | 2259   | bb       | Unknown   |
| 2     | 35.909         | 4032801 | 96.02    | 34975  | bb       | Unknown   |

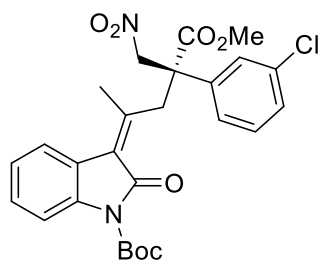

**4g**

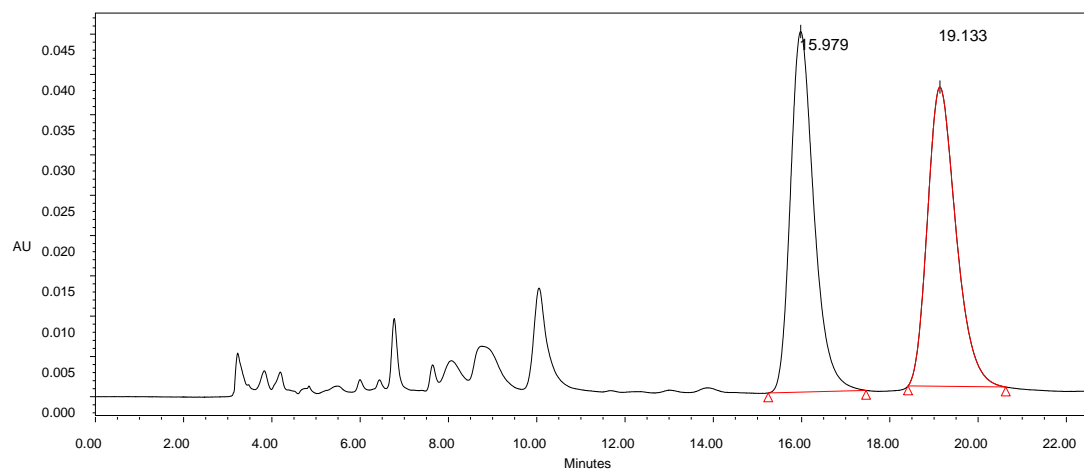

| Entry | Retention Time | Area    | Area (%) | Height | Int Type | Peak Type |
|-------|----------------|---------|----------|--------|----------|-----------|
| 1     | 15.979         | 1655546 | 49.80    | 44750  | bb       | Unknown   |
| 2     | 19.133         | 1668782 | 50.20    | 37129  | bb       | Unknown   |

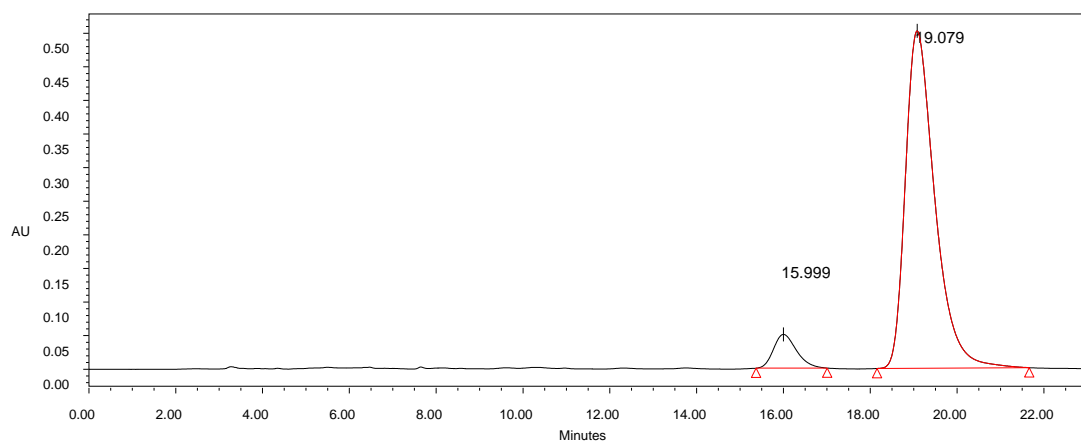

| Entry | Retention Time | Area     | Area (%) | Height | Int Type | Peak Type |
|-------|----------------|----------|----------|--------|----------|-----------|
| 1     | 15.999         | 1843243  | 7.21     | 50229  | bb       | Unknown   |
| 2     | 19.079         | 23709372 | 92.79    | 502135 | bb       | Unknown   |



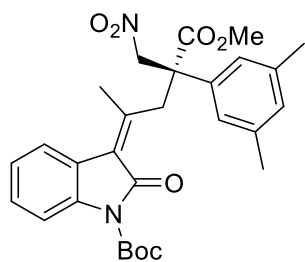

4h

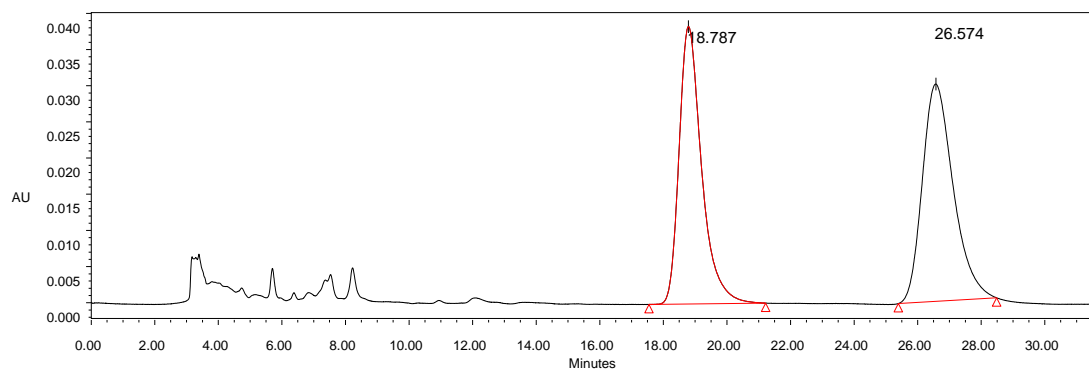

| Entry | Retention Time | Area    | Area (%) | Height | Int Type | Peak Type |
|-------|----------------|---------|----------|--------|----------|-----------|
| 1     | 18.787         | 1887534 | 48.21    | 38345  | bb       | Unknown   |
| 2     | 26.574         | 2027784 | 51.79    | 30044  | bb       | Unknown   |

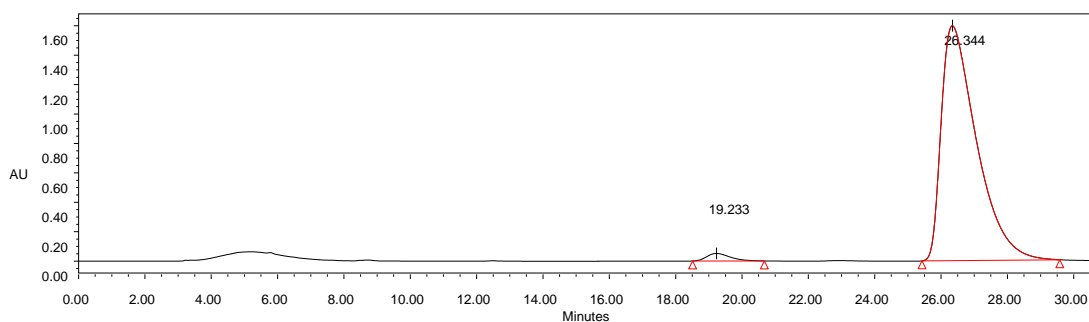

| Entry | Retention Time | Area      | Area (%) | Height  | Int Type | Peak Type |
|-------|----------------|-----------|----------|---------|----------|-----------|
| 1     | 19.233         | 2513466   | 2.09     | 51300   | bb       | Unknown   |
| 2     | 26.344         | 117744895 | 97.91    | 1596904 | bb       | Unknown   |

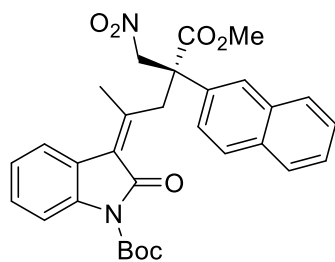

4i

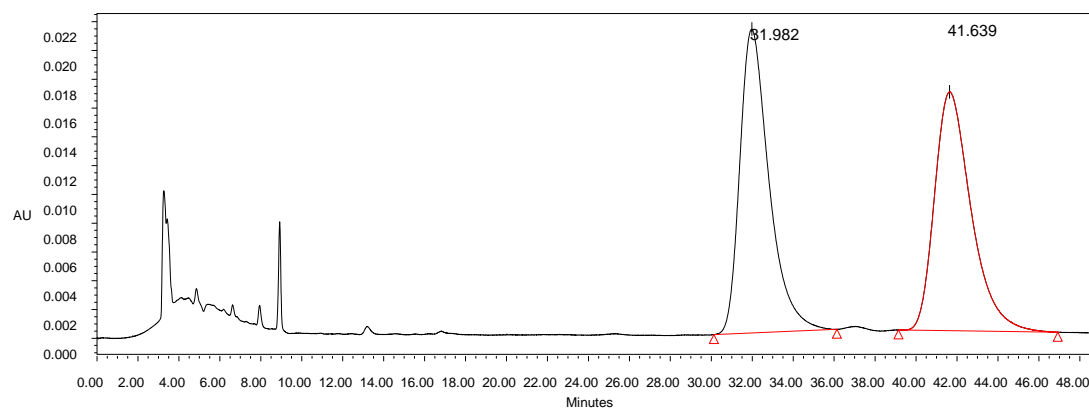

| Entry | Retention Time | Area    | Area (%) | Height | Int Type | Peak Type |
|-------|----------------|---------|----------|--------|----------|-----------|
| 1     | 31.982         | 2091266 | 50.35    | 21118  | bb       | Unknown   |
| 2     | 41.639         | 2061949 | 49.65    | 16593  | bb       | Unknown   |

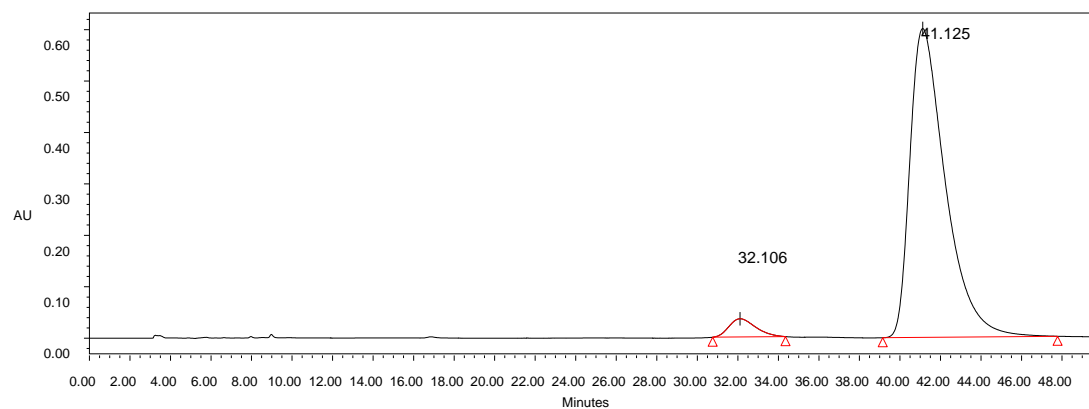

| Entry | Retention Time | Area     | Area (%) | Height | Int Type | Peak Type |
|-------|----------------|----------|----------|--------|----------|-----------|
| 1     | 32.106         | 3245893  | 4.24     | 35463  | bb       | Unknown   |
| 2     | 41.125         | 73230247 | 95.76    | 600674 | bb       | Unknown   |

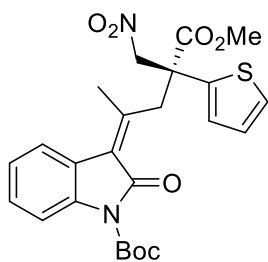

4j

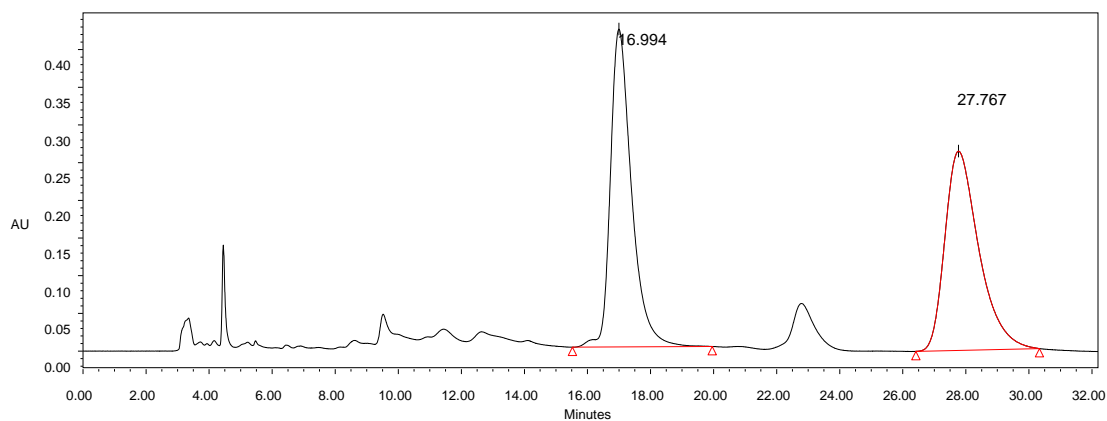

| Entry | Retention Time | Area     | Area (%) | Height | Int Type | Peak Type |
|-------|----------------|----------|----------|--------|----------|-----------|
| 1     | 16.994         | 19697685 | 49.92    | 421824 | bb       | Unknown   |
| 2     | 27.767         | 19759125 | 50.08    | 264507 | bb       | Unknown   |

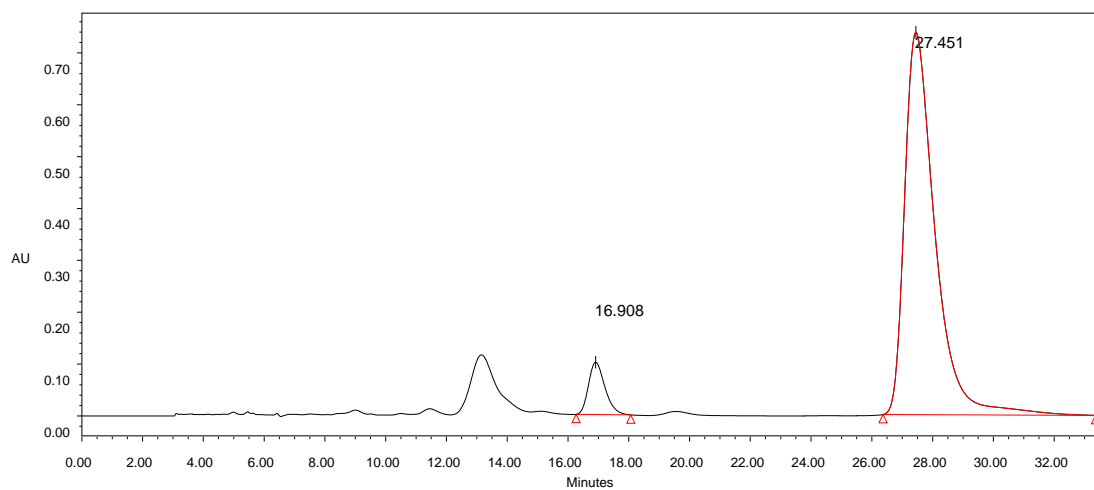

| Entry | Retention Time | Area     | Area (%) | Height | Int Type | Peak Type |
|-------|----------------|----------|----------|--------|----------|-----------|
| 1     | 16.908         | 3802126  | 6.90     | 100996 | bb       | Unknown   |
| 2     | 27.451         | 51286404 | 93.10    | 737153 | bb       | Unknown   |

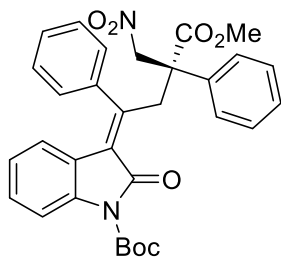

4k

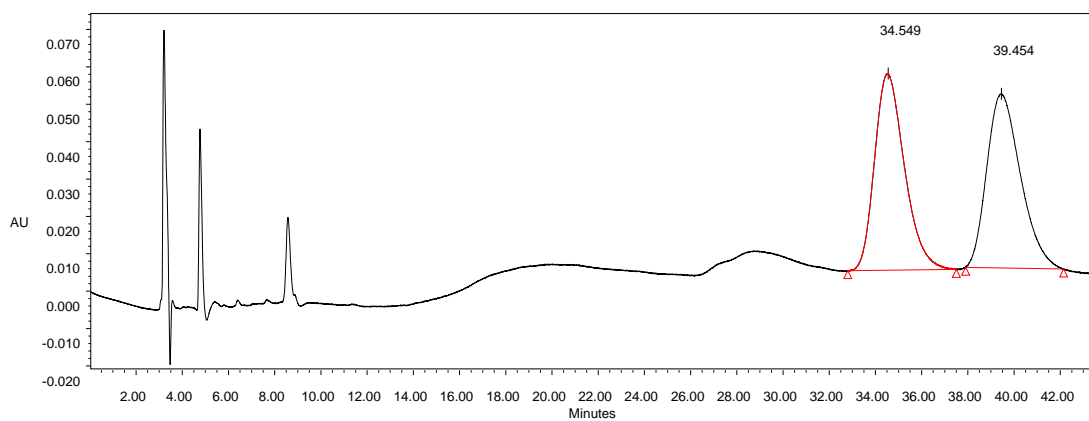

| Entry | Retention Time | Area    | Area (%) | Height | Int Type | Peak Type |
|-------|----------------|---------|----------|--------|----------|-----------|
| 1     | 34.549         | 4726916 | 50.02    | 52589  | bb       | Unknown   |
| 2     | 39.454         | 4722888 | 49.98    | 46575  | bb       | Unknown   |

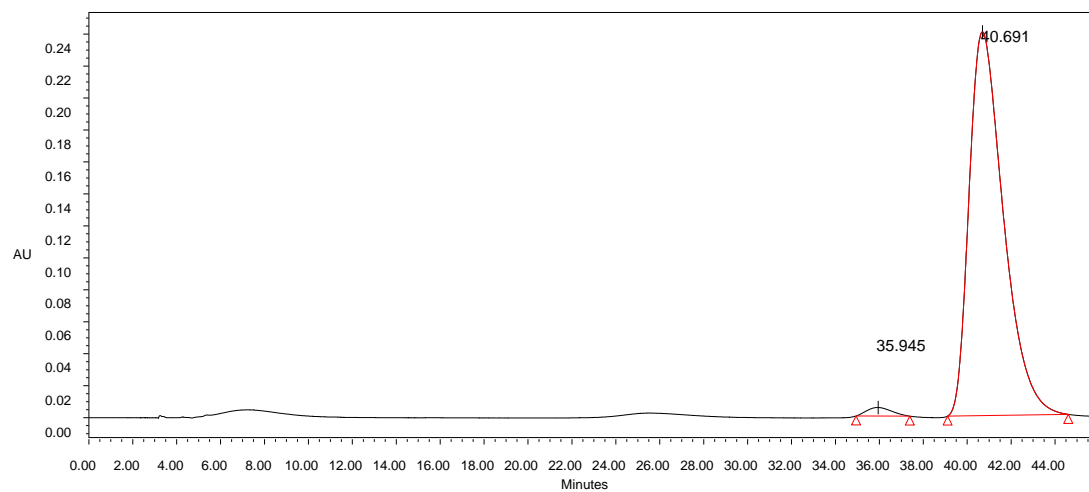

| Entry | Retention Time | Area     | Area (%) | Height | Int Type | Peak Type |
|-------|----------------|----------|----------|--------|----------|-----------|
| 1     | 35.945         | 419989   | 1.58     | 5369   | bb       | Unknown   |
| 2     | 40.691         | 26110850 | 98.42    | 240099 | bb       | Unknown   |

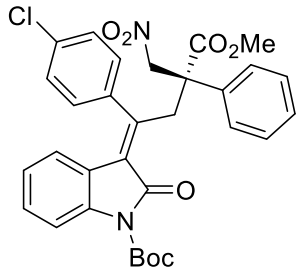

41

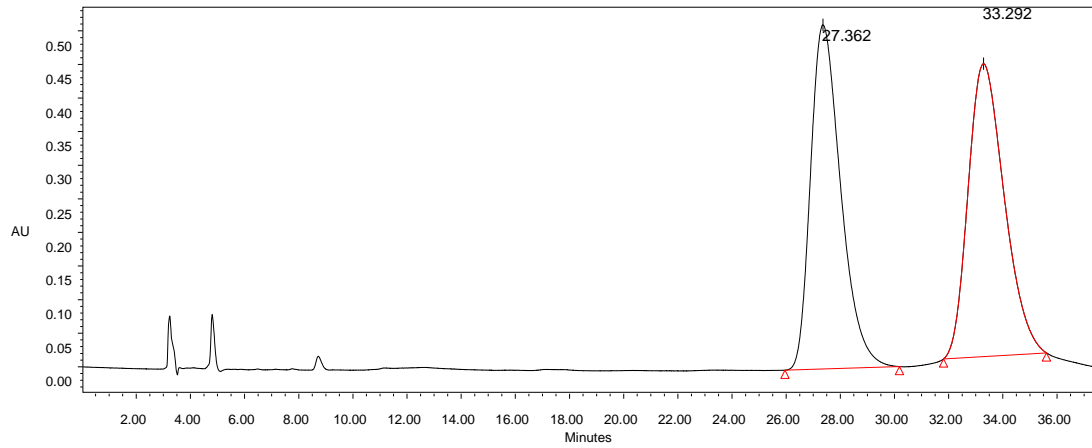

| Entry | Retention Time | Area     | Area (%) | Height | Int Type | Peak Type |
|-------|----------------|----------|----------|--------|----------|-----------|
| 1     | 27.362         | 39660558 | 49.49    | 512108 | bb       | Unknown   |
| 2     | 33.292         | 40474990 | 50.51    | 436067 | bb       | Unknown   |

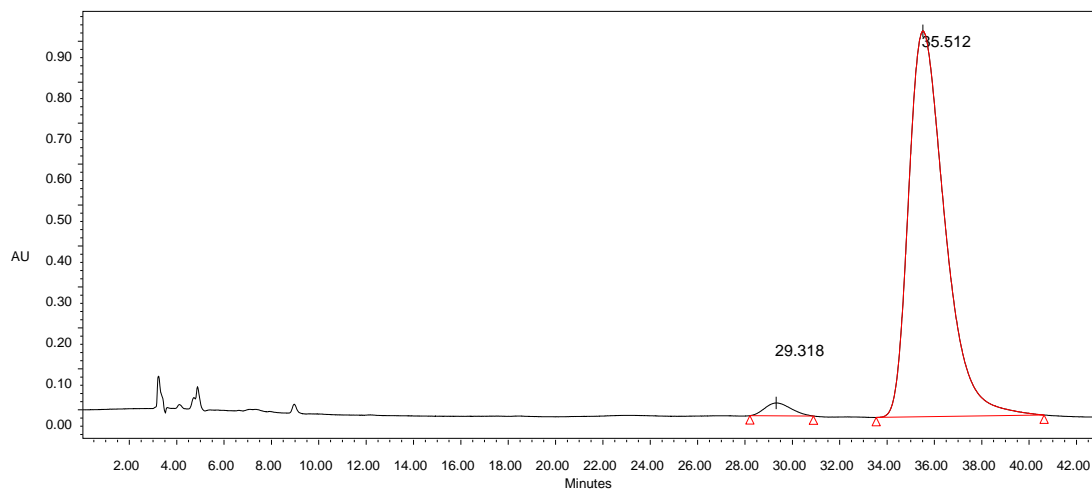

| Entry | Retention Time | Area      | Area (%) | Height | Int Type | Peak Type |
|-------|----------------|-----------|----------|--------|----------|-----------|
| 1     | 29.318         | 2407607   | 2.34     | 31356  | bb       | Unknown   |
| 2     | 35.512         | 100401256 | 97.66    | 942488 | bb       | Unknown   |

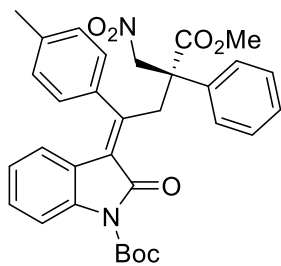

4m

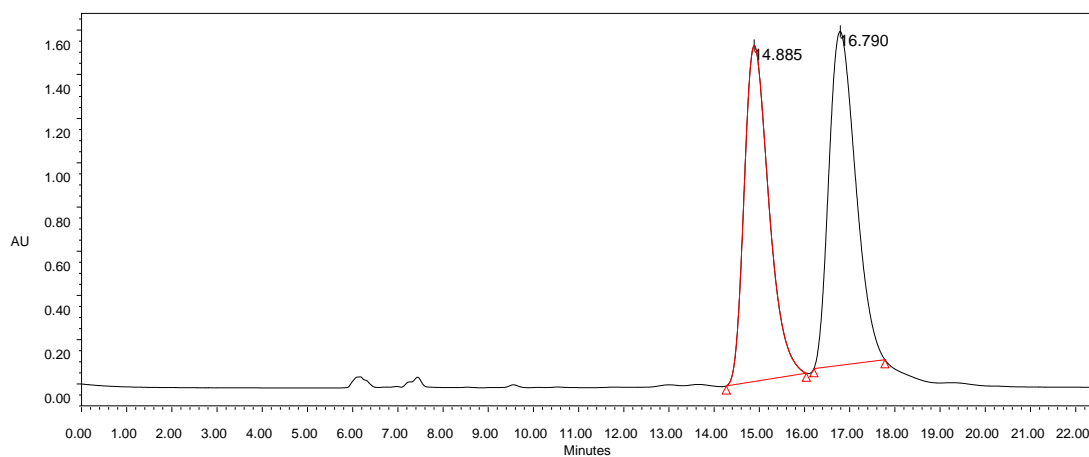

| Entry | Retention Time | Area     | Area (%) | Height  | Int Type | Peak Type |
|-------|----------------|----------|----------|---------|----------|-----------|
| 1     | 14.885         | 57816854 | 48.29    | 1519438 | bb       | Unknown   |
| 2     | 16.790         | 61911467 | 51.71    | 1510405 | bb       | Unknown   |

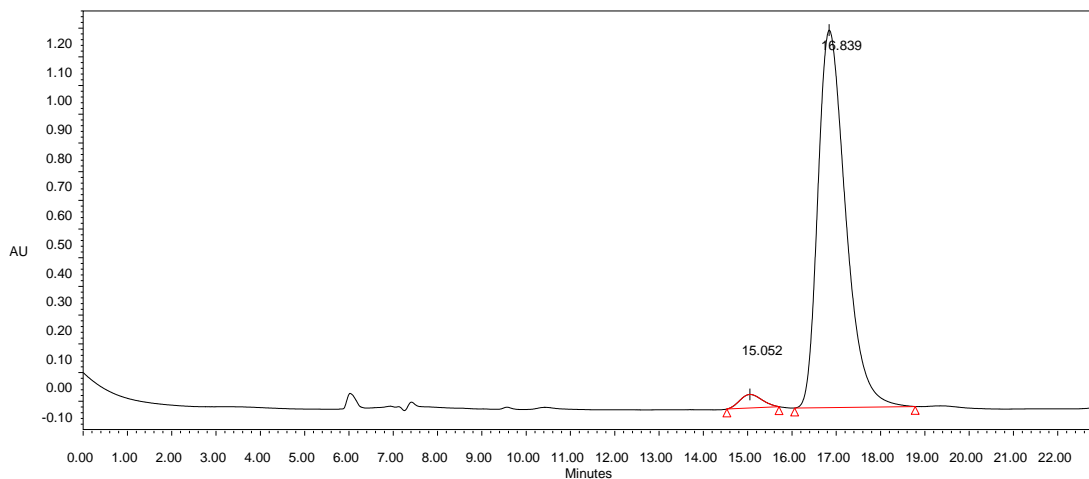

| Entry | Retention Time | Area     | Area (%) | Height  | Int Type | Peak Type |
|-------|----------------|----------|----------|---------|----------|-----------|
| 1     | 15.052         | 1637075  | 2.78     | 47222   | bb       | Unknown   |
| 2     | 16.839         | 57217215 | 97.22    | 1315281 | bb       | Unknown   |

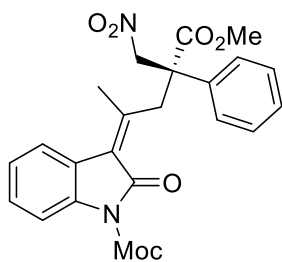

4p

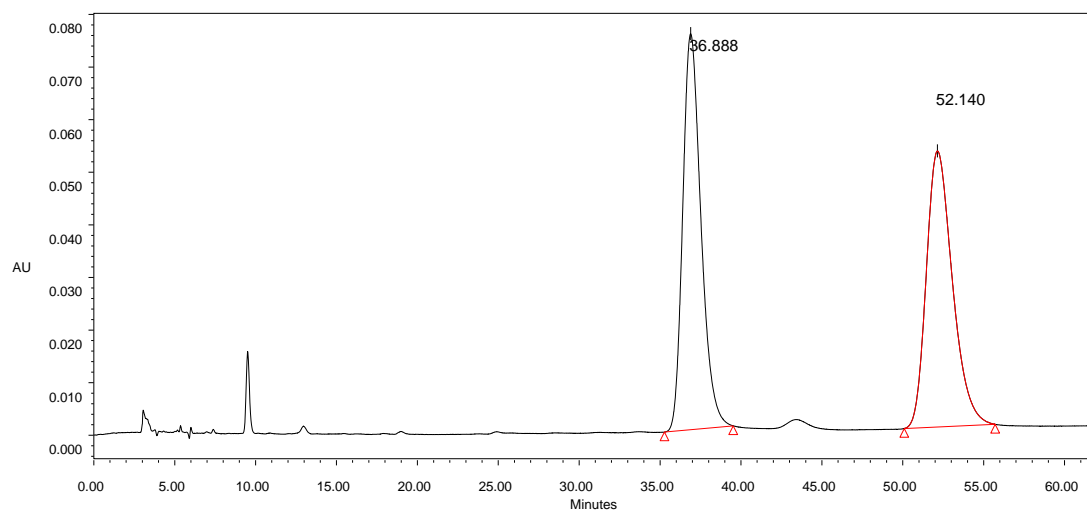

| Entry | Retention Time | Area    | Area (%) | Height | Int Type | Peak Type |
|-------|----------------|---------|----------|--------|----------|-----------|
| 1     | 36.888         | 5916233 | 50.14    | 75286  | bb       | Unknown   |
| 2     | 52.140         | 5882144 | 49.86    | 52500  | bb       | Unknown   |

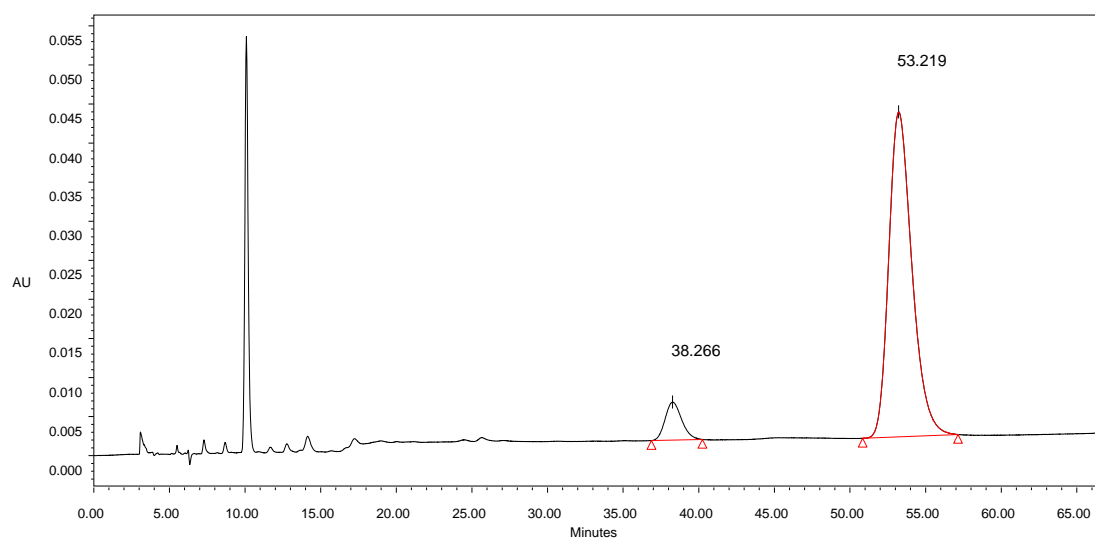

| Entry | Retention Time | Area    | Area (%) | Height | Int Type | Peak Type |
|-------|----------------|---------|----------|--------|----------|-----------|
| 1     | 38.266         | 370100  | 7.69     | 4877   | bb       | Unknown   |
| 2     | 53.219         | 4444357 | 92.31    | 41595  | bb       | Unknown   |

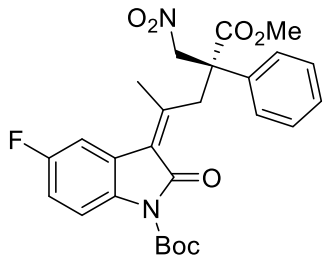

4q

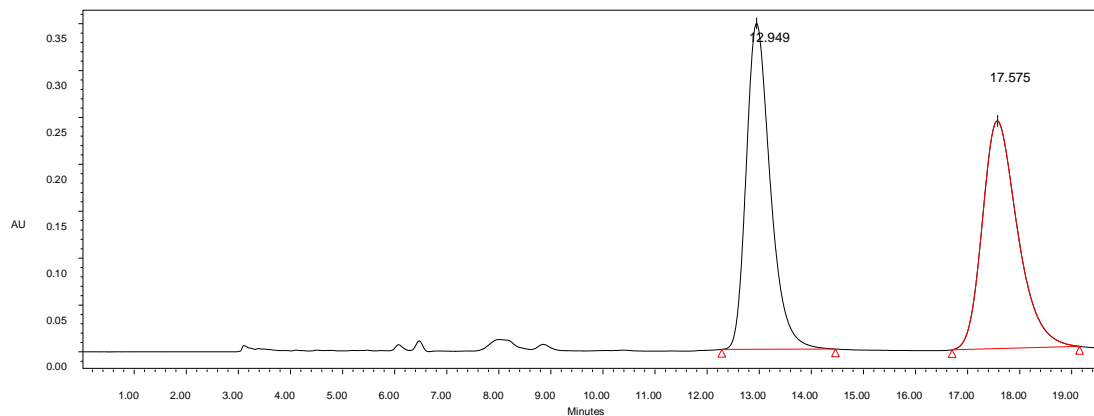

| Entry | Retention Time | Area     | Area (%) | Height | Int Type | Peak Type |
|-------|----------------|----------|----------|--------|----------|-----------|
| 1     | 12.949         | 11172029 | 49.47    | 347688 | bb       | Unknown   |
| 2     | 17.575         | 11412518 | 50.53    | 242814 | bb       | Unknown   |

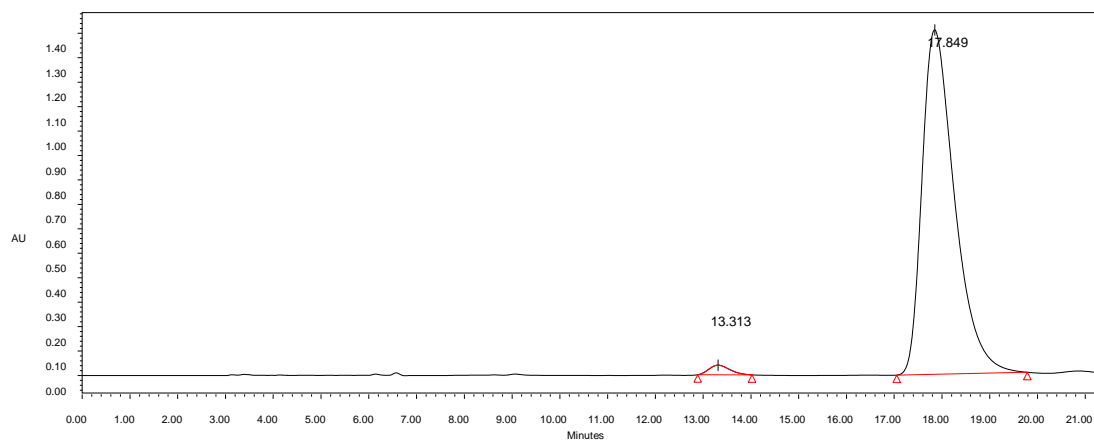

| Entry | Retention Time | Area     | Area (%) | Height  | Int Type | Peak Type |
|-------|----------------|----------|----------|---------|----------|-----------|
| 1     | 13.313         | 1192910  | 1.76     | 39372   | bb       | Unknown   |
| 2     | 17.849         | 66698289 | 98.24    | 1408903 | bb       | Unknown   |



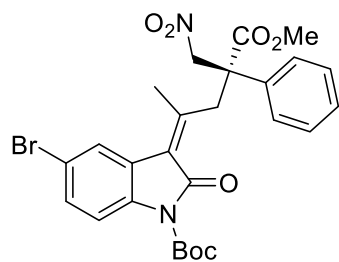

4r

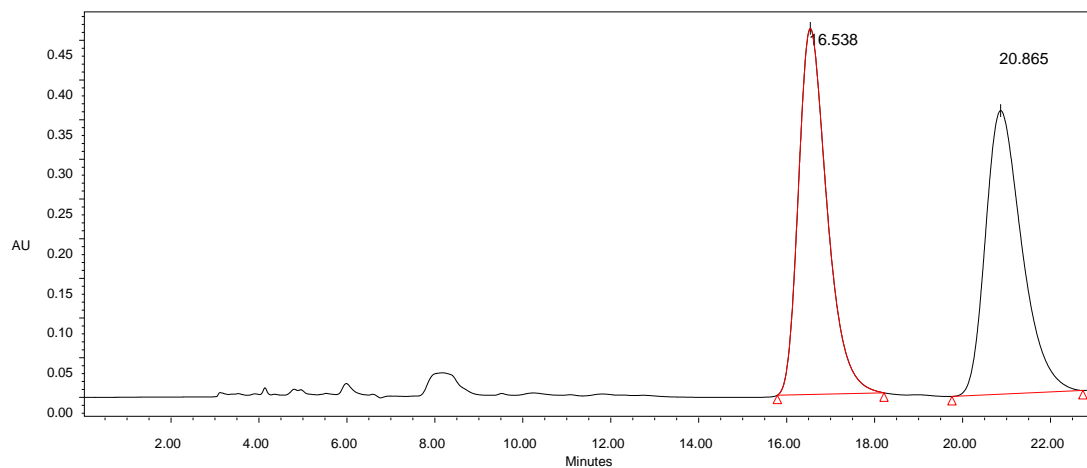

| Entry | Retention Time | Area     | Area (%) | Height | Int Type | Peak Type |
|-------|----------------|----------|----------|--------|----------|-----------|
| 1     | 16.538         | 20869603 | 50.42    | 461322 | bb       | Unknown   |
| 2     | 20.865         | 20522654 | 49.58    | 357489 | bb       | Unknown   |

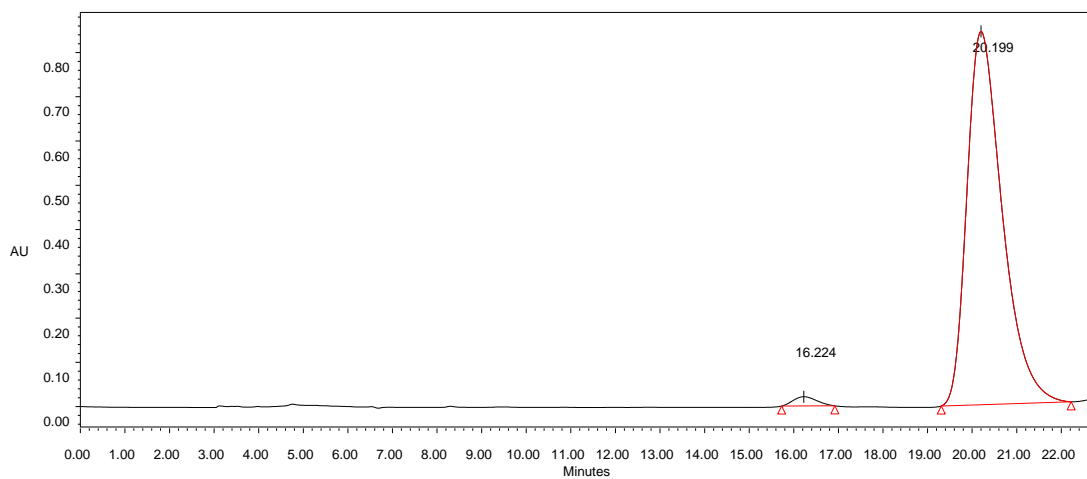

| Entry | Retention Time | Area     | Area (%) | Height | Int Type | Peak Type |
|-------|----------------|----------|----------|--------|----------|-----------|
| 1     | 16.224         | 762256   | 1.61     | 20836  | bb       | Unknown   |
| 2     | 20.199         | 46477365 | 98.39    | 843651 | bb       | Unknown   |

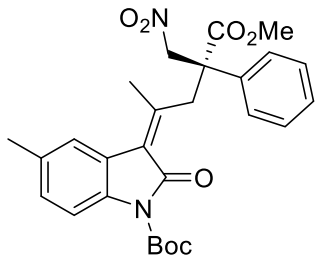

4s

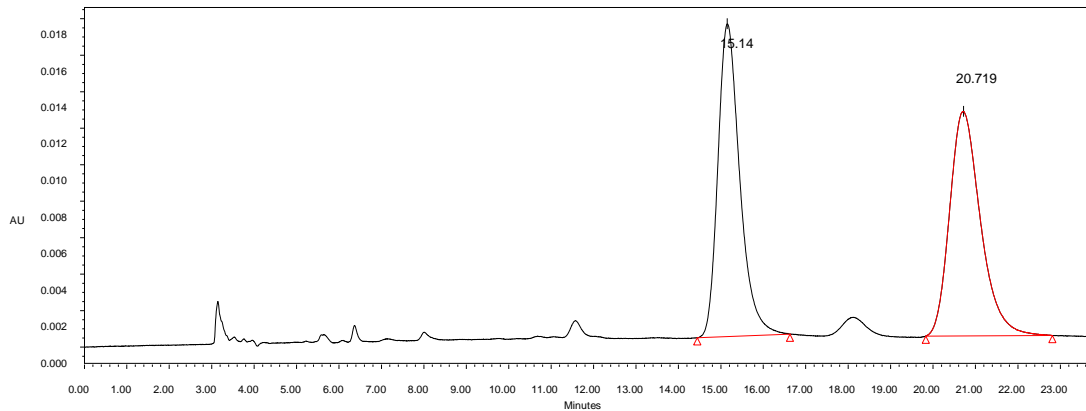

| Entry | Retention Time | Area   | Area (%) | Height | Int Type | Peak Type |
|-------|----------------|--------|----------|--------|----------|-----------|
| 1     | 15.148         | 616044 | 49.75    | 17151  | bb       | Unknown   |
| 2     | 20.719         | 622295 | 50.25    | 12319  | bb       | Unknown   |

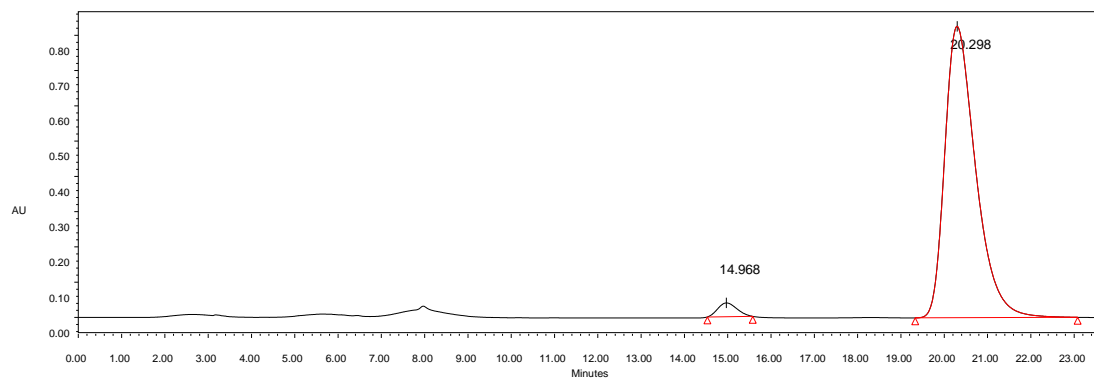

| Entry | Retention Time | Area     | Area (%) | Height | Int Type | Peak Type |
|-------|----------------|----------|----------|--------|----------|-----------|
| 1     | 14.968         | 1193201  | 2.83     | 39124  | bb       | Unknown   |
| 2     | 20.298         | 40950116 | 97.17    | 826166 | bb       | Unknown   |

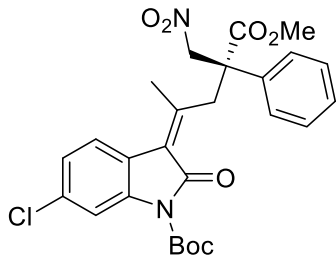

4t

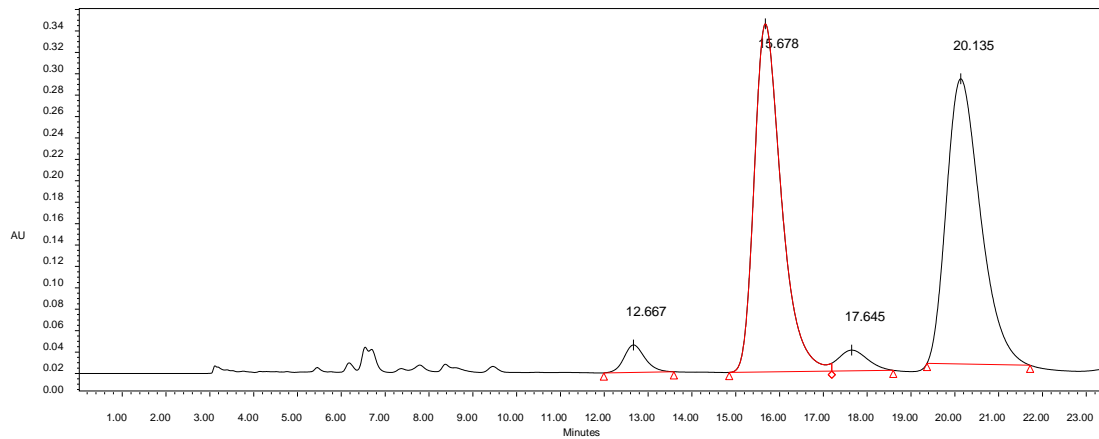

| Entry | Retention Time | Area     | Area (%) | Height | Int Type | Peak Type |
|-------|----------------|----------|----------|--------|----------|-----------|
| 1     | 12.667         | 850646   | 2.82     | 25652  | BB       | Unknown   |
| 2     | 15.678         | 14037255 | 46.59    | 325215 | Bv       | Unknown   |
| 3     | 17.645         | 874464   | 2.90     | 19369  | vb       | Unknown   |
| 4     | 20.135         | 14365992 | 47.68    | 266418 | bb       | Unknown   |

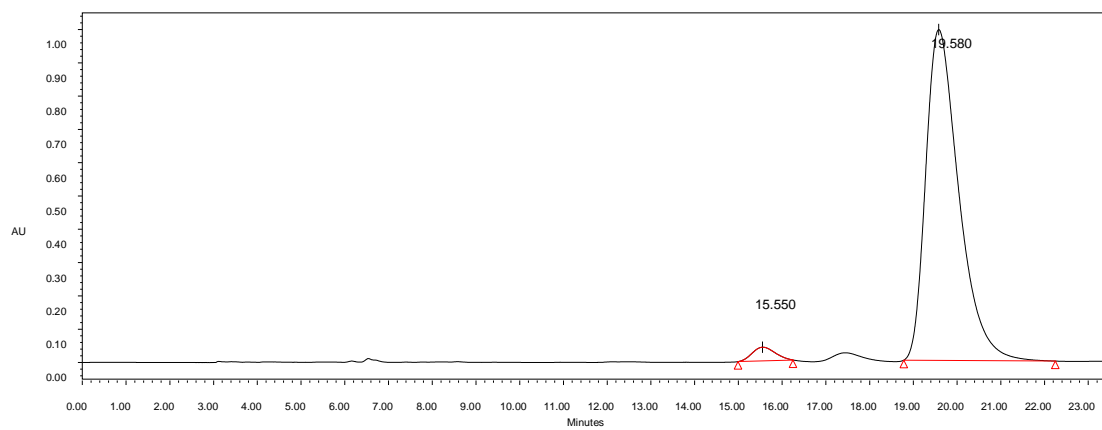

| Entry | Retention Time | Area     | Area (%) | Height | Int Type | Peak Type |
|-------|----------------|----------|----------|--------|----------|-----------|
| 1     | 15.550         | 1498731  | 2.79     | 41197  | bb       | Unknown   |
| 2     | 19.580         | 52257038 | 97.21    | 993875 | bb       | Unknown   |

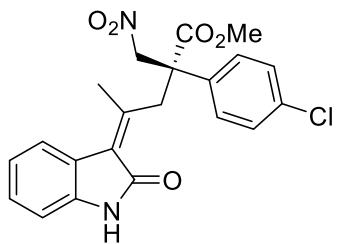

5

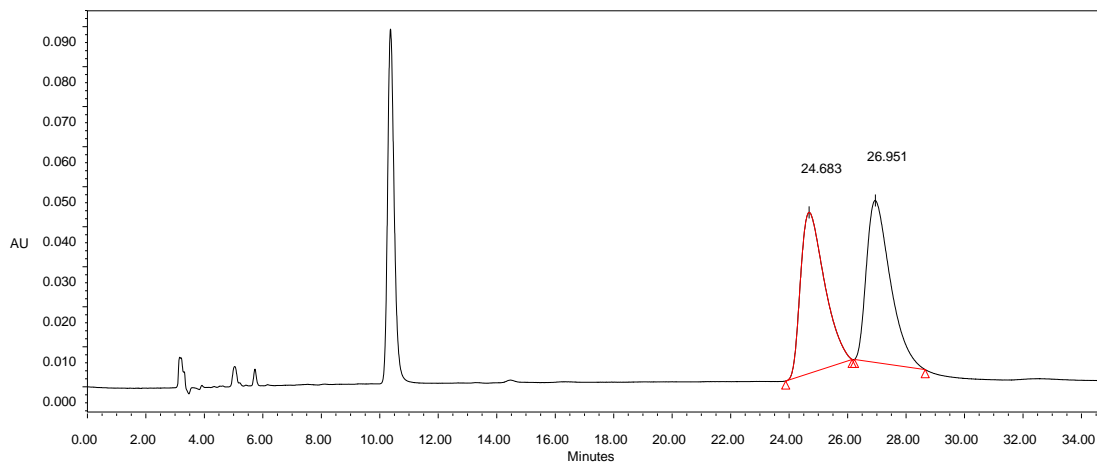

| Entry | Retention Time | Area    | Area (%) | Height | Int Type | Peak Type |
|-------|----------------|---------|----------|--------|----------|-----------|
| 1     | 24.683         | 2289977 | 50.02    | 40239  | bb       | Unknown   |
| 2     | 26.951         | 2288164 | 49.98    | 40476  | bb       | Unknown   |

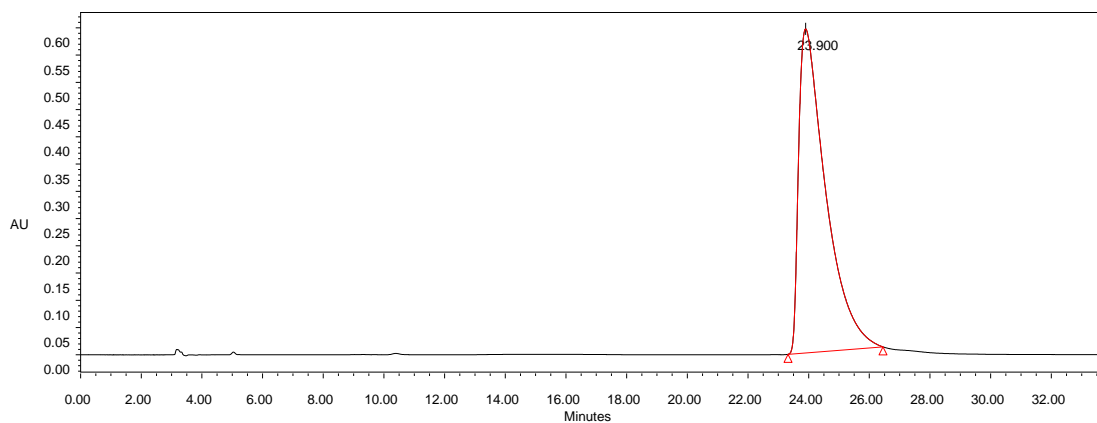

| Entry | Retention Time | Area     | Area (%) | Height | Int Type | Peak Type |
|-------|----------------|----------|----------|--------|----------|-----------|
| 1     | 23.900         | 36795471 | 99.99    | 594748 | bb       | Unknown   |
